# Supplementary material for: SARS-CoV-2 seroprevalence in a high-altitude setting in Peru: adult population-based cross-sectional study
Source: PeerJ. 2021 Sep 20;9:e12149. doi: 10.7717/peerj.12149 (PMC8459728; doi:10.7717/peerj.12149)
Supplement: Supplemental Information 1 [file peerj-09-12149-s001.xlsx]

## Sheet: Hoja1
cdo	member	Site	codfam	Gender	Age	npeopleinfamily	HBP	DM	renal	cancer	cardiac_disease	asthma	Weight	Height	Cough	Throat pain	Back pain	Difficulty breathing	Fever	General discomfort	Diarrhea	Nasal congestion	Headache	Muscle pain	Decreased smell	away from other people	Use of mask	Use of N95 mask	Use of a face shield	Use of gloves	Use of alcohol	wash my hands	lab result	date	imc	years_of_study	phhogar	phogarmuerta	phogarcovid	pcontactocovid
909	1	Quillabamba	18	Fem	45	2	Not	Not	Not	Not	Not	Not	65	1.5	Not	Not	Not	Not	Not	Not	Not	Not	Yes	Not	Not	Always	Always	Never	Never	Never	Always	Always	Not	20 Sep 20	28.8889	12a+	2	Not	Not	Not
115	1	Periphery of Cusco	3892	Masc	83	1	Yes	Not	Not	Not	Not	Not	72	1.63	Not	Not	Not	Not	Not	Not	Not	Not	Not	Not	Not	Frequently	Always	Never	Sometimes	Never	Frequently	Always	Not	14 Sep 20	27.0993	7-11a	1	Not	Not	Not
46	1	Cusco	1151	Fem	57	2	Not	Not	Not	Yes	Not	Not	60	1.56	Not	Not	Not	Not	Not	Not	Not	Not	Yes	Yes	Not		Sometimes	Never	Sometimes		Frequently	Always	Not	14 Sep 20	24.6548	12a+	2	Not	Not	Yes
559	1	Cusco	559.1.10	Masc	23	1	Not	Not	Not	Not	Not	Not	64	1.6	Not	Yes	Not	Not	Not	Not	Not	Not	Not	Not	Not	Always	Always	Sometimes	Frequently	Never	Always	Always	Not	20 Sep 20	25	12a+	2	Not	Not	Not
507	1	Cusco	21roc01	Fem	48	1	Not	Not	Not	Not	Not	Not	78	1.63	Not	Not	Not	Not	Not	Not	Not	Not	Yes	Not	Not	Always	Always	Always	Frequently	Never	Always	Always	Not	20 Sep 20	29.3575	12a+	2	Not	Not	Not
454	1	Quillabamba	1004	Masc	46	2	Not	Not	Not	Not		Not	52	1.58	Not	Not	Not	Not	Not	Not	Not	Not	Not	Not	Not	Frequently	Frequently	Never	Never	Never	Frequently	Frequently	Not	19 Sep 20	20.83	7-11a	2	Not	Not	Not
78	1	Periphery of Cusco	462B	Fem	46	2	Not	Not	Not	Not	Not	Not	60	1.67	Not	Not	Not	Not	Not	Not	Not	Not	Not	Not	Not	Always	Always				Always	Always	Not	14 Sep 20	21.5139	12a+	2	Not	Not	Not
557	1	Cusco	557.1.10	Masc	30	1	Not	Not	Not	Not	Not	Not	62	1.6	Not	Not	Not	Not	Not	Not	Not	Not	Not	Not	Not	Always	Always	Sometimes	Sometimes	Never	Always	Always	Not	20 Sep 20	24.2188	12a+	1	Not	Not	Not
265	1	Periphery of Cusco	77022	Masc	75	2	Not	Not	Not	Not	Not	Not	56	1.67	Not	Not	Not	Not	Not	Not	Not	Not	Not	Not	Not	Always	Always	Never	Frequently	Never	Always	Always	Not	19 Sep 20	20.0796	12a+	2	Not	Not	Not
205	1	Quillabamba	Q205	Masc	57	1	Not	Yes	Not	Not	Not	Not	87	1.68	Not	Not	Not	Not	Not	Not	Not	Not	Not	Not	Not	Always	Always	Never	Sometimes	Sometimes	Always	Always	Not	14 Sep 20	30.8248	7-11a	2	Not	Not	Not
1011- 429	2	Quillabamba	N3	Fem	19	2	Not	Not	Not	Not	Not	Not	57	1.66	Not	Not	Not	Not	Yes	Yes	Not	Not	Yes	Not	Not	Frequently	Frequently	Never	Never	Never	Frequently	Frequently	Not	20 Sep 20	20.6852	7-11a	2	Not	Not	Not
131	1	Periphery of Cusco	4431	Masc	25	1	Not	Not	Not	Not	Not	Not	78	1.65	Not	Not	Not	Not	Not	Not	Not	Not	Not	Not	Not	Always	Always	Never	Never	Never	Always	Always	Not	14 Sep 20	28.6501	12a+	1	Not	Not	Not
629	1	Cusco	45ZB29	Fem	74	2	Yes	Not	Not	Not	Not	Not	60	1.6	Not	Yes	Not	Not	Not	Not	Not	Not	Yes	Not	Not	Always	Always	Sometimes	Frequently	Never	Always	Always	Not	26 Sep 20	23.4375	7-11a	2	Not	Not	Not
939	1	Quillabamba	48	Masc	21	2	Not	Not	Not	Not	Not	Not			Yes	Not	Yes	Not	Not	Not	Not	Not	Not	Not	Not	Always	Always	Never	Never	Never	Always	Always	Yes	20 Sep 20		7-11a	2	Not	Not	Not
738	1	Cusco	45JL11	Fem	70	1	Not	Not	Not	Not	Not	Not	68	1.55	Not	Not	Not	Not	Not	Not	Not	Not	Not	Not	Not	Always	Always	Never	Sometimes	Never	Always	Always	Not	27 Sep 20	28.3039	<7a	1	Not	Not	Not
32	1	Cusco	1142A	Fem	26	1	Not	Not	Not	Not	Not	Not	60	1.55	Not	Not	Not	Not	Not	Yes	Not	Not	Yes	Yes	Not	Frequently	Always	Never	Always	Never	Always	Always	Yes	14 Sep 20	24.974	12a+	1	Not	Not	Not
50	1	Cusco	3052	Masc	34	2	Not	Not	Not	Not	Not	Not	67	1.68	Not	Yes	Not	Not	Not	Yes	Not	Not	Yes	Not	Not	Always	Always	Never	Sometimes	Never	Always	Always	Not	14 Sep 20	23.7387	12a+	2	Yes	Yes	Not
89	2	Periphery of Cusco	411G	Fem	68	2	Yes	Not	Not	Not	Not	Not			Not	Not	Not	Not	Not	Not	Not	Not	Not	Not	Not	Frequently	Frequently	Sometimes	Always	Sometimes	Always	Always	Yes	14 Sep 20		<7a	2	Not	Yes	Not
486	1	Quillabamba	1035	Fem	36	1	Not	Not	Not	Not	Not	Not	77	1.62	Not	Yes	Not	Not	Not	Not	Not	Not	Not	Not	Not	Always	Always	Never	Never	Never	Always	Always	Yes	19 Sep 20	29.34	7-11a	2	Not	Not	Not
529	2	Cusco	45ANT01	Fem	24	2	Not	Not	Not	Not	Not	Not	68	1.57	Not	Not	Not	Not	Not	Not	Not	Not	Yes	Yes	Not	Always	Always	Never	Sometimes	Never	Always	Frequently	Yes	20 Sep 20	27.5873	7-11a	2	Not	Not	Not
39	2	Periphery of Cusco	9613	Fem	64	2	Not	Not	Not	Not	Not	Not	63	1.49	Not	Not	Not	Not	Not	Not	Not	Not	Not	Not	Not	Frequently	Always		Always	Never	Always	Frequently	Not	14 Sep 20	28.3771	<7a	2	Not	Not	Not
9	1	Periphery of Cusco	22241	Fem	39	1	Yes	Not	Not	Not	Not	Not	55	1.52	Yes	Not	Not	Not	Yes	Not	Yes	Not	Yes	Yes	Not	Frequently	Always	Never	Sometimes	Never	Frequently	Frequently	Not	14 Sep 20	23.8054	7-11a	2	Not	Not	Not
449	1	Quillabamba	7	Masc	65	1	Not	Yes	Not	Not	Not	Not	59	1.56	Not	Not	Not	Not	Not	Not	Not	Yes	Not	Not	Not	Frequently	Always	Sometimes	Never	Never	Always	Frequently	Not	20 Sep 20	24.2439	7-11a	2	Not	Not	Not
474	1	Quillabamba	1024	Fem	45	1	Not	Not	Not	Not	Not	Not	53	1.45	Not	Not	Not	Not	Not	Not	Not	Not	Not	Not	Not	Sometimes	Always	Never	Never	Never	Always	Always	Not	19 Sep 20	25.2081	7-11a	2	Not	Not	Not
371	1	Periphery of Cusco	25A18	Masc	58	2	Not	Not	Not	Not	Not	Not	82	1.61	Not	Yes	Yes	Not	Not	Not	Not	Not	Not	Not	Not	Always	Always	Never	Sometimes	Never	Always	Always	Not	26 Sep 20	31.6346	<7a	2	Not	Not	Not
166	2	Quillabamba	21	Fem	29	2	Not	Not	Not	Not	Not	Not	58	1.5	Not	Not	Not	Not	Not	Not	Not	Not	Not	Not	Not	Always	Always	Never	Never	Never	Sometimes	Always	Not	14 Sep 20	25.7778	12a+	2	Not	Not	Not
89	1	Periphery of Cusco	411G	Fem	23	2	Not	Not	Not	Not	Not	Not			Not	Not	Not	Not	Not	Not	Not	Not	Not	Not	Not	Always	Always	Always	Always	Always	Always	Always	Yes	14 Sep 20		12a+	2	Not	Yes	Not
332	2	Periphery of Cusco	5205	Masc	48	3	Not	Not	Not	Not	Not	Not	64	1.68	Yes	Yes	Yes	Not	Yes	Yes	Not	Not	Yes	Yes	Yes	Frequently	Always	Never	Sometimes	Never	Never	Always	Yes	25 Sep 20	22.6757	<7a	2	Not	Not	Not
1013 430	1	Quillabamba	N4	Fem	55	1	Not		Not	Not	Not	Not	60	1.54	Not	Not	Not	Not	Not	Not	Not	Not	Not	Not	Not	Frequently	Frequently	Sometimes	Frequently	Sometimes	Frequently	Always	Not	14 Sep 20	25.2994	12a+	2	Not	Not	Yes
925	1	Quillabamba	34	Fem	28	3	Not	Not	Not	Not	Not	Not	55	1.63	Not	Not	Not	Not	Not	Not	Not	Not	Not	Not	Not	Always	Always	Never	Never	Never	Always	Always	Not	20 Sep 20	20.7008	12a+	2	Not	Not	Not
1008 - 426	2	Cusco	45ER27	Fem	58	3	Not	Not	Not	Not	Not	Not	80	1.68	Not	Not	Not	Not	Not	Not	Not	Not	Not	Not	Not	Always	Always	Always	Always	Always	Always	Always	Not	20 Sep 20	28.3447	12a+	2	Not	Not	Not
554	1	Cusco	45-2U9	Masc	59	2	Yes	Not	Not	Not	Not	Not	68	1.69	Not	Not	Not	Not	Not	Not	Not	Not	Not	Not	Not	Always		Sometimes	Frequently	Never	Always	Always	Not	20 Sep 20	23.8087	7-11a	2	Not	Not	Not
27	1	Periphery of Cusco	4991	Masc	71	2	Yes	Not	Not	Not	Not	Not	70	1.64	Not	Not	Not	Not	Not	Not	Not	Not	Not	Not	Not	Always	Always	Never	Never	Never	Always	Always	Not	14 Sep 20	26.0262	7-11a	2	Not	Not	Not
1008 - 426	1	Cusco	45ER27	Masc	65	3	Not	Not	Not	Not	Not	Not	85	1.72	Not	Not	Not	Not	Not	Not	Not	Not	Not	Not	Not	Always	Always	Always	Always	Always	Always	Always	Not	20 Sep 20	28.7318	12a+	2	Not	Not	Not
455	1	Quillabamba	1005	Fem	42	1	Not	Not	Not	Not	Not	Not	78	1.62	Not	Not	Not	Not	Yes	Not	Not	Not	Yes	Not	Not	Always	Never	Never	Never	Never	Always	Always	Not	19 Sep 20	29.7211	12a+	1	Not	Not	Not
158	1	Quillabamba	1	Fem	59	1	Not	Not	Not	Not	Not	Not	55	1.63	Not	Not	Yes	Not	Not	Not	Not	Not	Yes	Not	Yes	Always	Frequently	Frequently	Never	Never	Always	Always	Yes	14 Sep 20	20.7008	7-11a	1	Not	Yes	Yes
471	1	Quillabamba	1021	Fem	50	1	Not	Not	Not	Not	Not	Not	55	1.56	Not	Yes	Yes	Not	Not	Yes	Not	Yes	Yes	Not	Not	Sometimes	Sometimes	Never	Never	Never	Sometimes	Always	Not	19 Sep 20	22.6003	12a+	2	Not	Not	Not
210	1	Quillabamba	Q210	Fem	54	2	Not	Not	Not	Not	Not	Not	61	1.55	Not	Not	Not	Not	Not	Not	Not	Not	Not	Not	Not	Frequently	Always	Sometimes	Frequently	Sometimes	Always	Always	Not	14 Sep 20	25.3902	12a+	2	Not	Not	Not
163	1	Quillabamba	24	Masc	67	1	Not	Not	Not	Not	Not	Not	78	1.62	Not	Not	Not	Not	Not	Not	Not	Not	Not	Not	Not	Always	Always	Never	Never	Never	Always	Always	Not	14 Sep 20	29.7211	12a+	1	Yes	Not	Not
46	2	Cusco	1151	Masc	57	2	Not	Not	Not	Not	Not	Not	72	1.76	Not	Not	Not	Not	Not	Not	Not	Not	Not	Not	Not	Always	Always	Never	Always	Never	Always	Always	Yes	14 Sep 20	23.2438	12a+	2	Not	Not	Yes
82	1	Periphery of Cusco	453C	Fem	28	2	Not	Not	Not	Not	Not	Not	56	1.55	Not	Not	Not	Not	Not	Not	Not	Not	Not	Not	Not	Frequently	Always		Sometimes	Sometimes	Always	Always	Not	14 Sep 20	23.309	7-11a	2	Not	Not	Not
17	1	Periphery of Cusco	34	Masc	30	1	Not	Not	Not	Not	Not	Yes	60	1.76	Not	Not	Yes	Not	Not	Not	Not	Not	Not	Not	Not	Frequently	Always	Sometimes	Frequently	Never	Frequently	Always	Not	14 Sep 20	19.3698	12a+	1	Not	Not	Not
27	2	Periphery of Cusco	4991	Fem	67	2	Not	Not	Not	Not	Not	Not	60	1.6	Not	Not	Not	Not	Not	Not	Not	Not	Not	Not	Not	Always	Always	Never	Never	Never	Always	Always	Not	14 Sep 20	23.4375	<7a	2	Not	Not	Not
178	1	Quillabamba	9	Fem	57	1	Not	Yes	Not	Not	Not	Not	88	1.5	Yes	Yes	Yes	Not	Not	Yes	Not	Not	Yes	Not	Not	Never	Never	Never	Never	Never	Never	Never	Not	14 Sep 20	39.1111		1	Not	Not	Not
361	1	Cusco	452B20	Fem	49	1	Yes	Not	Not	Not	Not	Not	58	1.55	Not	Not	Yes	Yes	Not	Not	Not	Not	Yes	Not	Not	Always	Always	Never	Always	Never	Always	Always	Not	26 Sep 20	24.1415	12a+	2	Not	Not	Not
925	3	Quillabamba	34	Fem	20	3	Not	Not	Not	Not	Not	Not	56	1.53	Not	Not	Not	Not	Not	Not	Not	Not	Not	Not	Not	Always	Always	Never	Never	Never	Always	Always	Yes	20 Sep 20	23.9224	12a+	2	Not	Not	Not
1008 - 426	3	Cusco	45ER27	Masc	63	3	Not	Not	Not	Not	Not	Not	67	1.67	Not	Not	Not	Not	Not	Not	Not	Not	Not	Not	Not	Always	Always		Always		Always	Always	Not	20 Sep 20	24.0238	<7a	2	Not	Not	Not
510	1	Cusco	21k003	Fem	21	1	Not	Not	Not	Not	Not	Not	51	1.54	Not	Yes	Yes	Yes	Yes	Yes	Yes	Yes	Yes	Yes	Not	Always	Always	Never	Always	Sometimes	Always	Always	Not	20 Sep 20	21.5045	12a+	1	Not	Not	Yes
554	2	Cusco	45-2U9	Fem	52	2	Not	Not	Not	Not	Not	Not	65	1.59	Not	Not	Not	Not	Not	Not	Not	Not	Not	Not	Not	Always	Always	Sometimes	Frequently	Sometimes	Always	Always	Not	20 Sep 20	25.711	12a+	2	Not	Not	Not
258	1	Periphery of Cusco	62091	Masc	57	1	Not	Not	Not	Not	Not	Not	78	1.72	Not	Not	Not	Not	Not	Not	Not	Not	Not	Yes	Not	Always	Always	Never	Frequently	Never	Always	Always	Not	19 Sep 20	26.3656	12a+	2	Not	Not	Not
236	2	Periphery of Cusco	5573	Masc	23	2	Not	Not	Not	Not		Not	70	1.69	Yes	Yes	Not	Not	Not	Not	Not	Not	Yes	Not	Not	Always	Always	Never	Always	Never	Always	Always	Not	19 Sep 20	24.5089	12a+	2	Not	Yes	Yes
918	2	Quillabamba	27	Fem	57	2	Not	Not	Not	Not	Not	Not	74	1.54	Not	Not	Not	Not	Not	Not	Not	Not	Not	Not	Not	Always	Always	Never	Never	Never	Always	Always	Not	20 Sep 20	31.2026	<7a	2	Not	Not	Not
629	2	Cusco	45ZB29	Masc	78	2	Not	Not	Not	Not	Not	Not	82	1.68	Not	Not	Yes	Not	Not	Not	Not	Not	Not	Not	Not	Always	Always	Never	Never	Never	Always	Always	Not	26 Sep 20	29.0533	12a+	2	Not	Not	Not
99	2	Periphery of Cusco	22271	Fem	58	2	Not	Not	Not	Not	Not	Not	70	1.6	Not	Not	Not	Not	Not	Not	Not	Not	Yes	Yes	Not	Always	Always	Sometimes	Always	Never	Always	Always	Not	14 Sep 20	27.3438	12a+	2	Yes	Not	Yes
51	1	Cusco	3053	Fem	59	2	Not	Not	Not	Not	Not	Not	70	1.55	Not	Yes	Not	Not	Yes	Yes	Not	Not	Yes	Not	Not	Always	Always	Never	Always	Sometimes	Always	Always	Not	14 Sep 20	29.1363	12a+	2	Not	Not	Yes
444	1	Quillabamba	2	Masc	52	2	Not	Yes	Not	Not	Not	Not	70	1.65	Not	Not	Not	Not	Not	Not	Not	Not	Not	Not	Not	Always	Always	Never	Never	Never	Always	Always	Not	20 Sep 20	25.7117	12a+	2	Not	Not	Not
939	2	Quillabamba	48	Fem	52	2	Not	Not	Not	Not	Not	Not			Not	Not	Yes	Not	Not	Not	Not	Not	Not	Not	Not	Always	Always	Never	Never	Never	Always	Always	Not	20 Sep 20		7-11a	2	Not	Not	Not
99	1	Periphery of Cusco	22271	Masc	66	2	Not	Not	Yes	Not	Not	Not	69	1.68	Not	Not	Yes	Not	Not	Not	Not	Not	Not	Not	Not	Always	Always	Sometimes	Always	Never	Always	Always	Not	14 Sep 20	24.4473	12a+	2	Yes	Not	Yes
332	3	Periphery of Cusco	5205	Fem	33	3	Not	Not	Not	Not		Not	70	1.6	Not	Yes	Yes	Not	Yes	Yes	Yes	Not	Not	Yes	Not	Always	Always	Never	Frequently	Sometimes	Always	Always	Yes	25 Sep 20	27.3438	7-11a	2	Not	Not	Not
179	1	Quillabamba	8	Masc	75	1	Yes	Yes	Not	Not	Not	Yes	60	1.65	Yes	Not	Yes	Not	Not	Yes	Not	Not	Not	Not	Not	Always	Always	Never	Always	Never	Always	Always	Not	14 Sep 20	22.0386	<7a	1	Not	Not	Not
137	1	Cusco	3115	Masc	70	2	Not	Not	Not	Not	Not	Not	90	1.75	Not	Not	Not	Not	Not	Not	Not	Not	Yes	Not	Not	Always	Always			Sometimes	Always	Always	Not	14 Sep 20	29.3878	12a+	2	Not	Not	Not
552	1	Cusco	45ER12	Fem	43	2	Not	Not	Not	Not	Not	Not	72	1.5	Yes	Not	Yes	Not	Not	Yes	Not	Not	Not	Not	Not	Frequently	Always	Always	Always	Always	Always	Always	Yes	20 Sep 20	32		2	Not	Yes	Yes
231	1	Periphery of Cusco	8372	Fem	22	1	Not	Not	Not	Not	Not	Not	69	1.6	Yes	Yes	Not	Not	Yes	Not	Not	Yes	Not	Not	Not	Frequently	Frequently	Never	Frequently	Sometimes	Always	Always	Yes	18 Sep 20	26.9531	12a+	2	Not	Not	Not
747	1	Cusco	45DR26	Fem	42	1	Not	Not	Not	Not	Not	Not	58	1.55	Not	Not	Not	Not	Not	Not	Not	Yes	Yes	Not	Not	Always	Always	Never	Always	Never	Always	Always	Yes	27 Sep 20	24.1415	7-11a	1	Not	Not	Not
236	1	Periphery of Cusco	5573	Fem	60	2	Not	Not	Not	Not	Not	Not	65	1.55	Yes	Yes	Yes	Not	Not	Not	Not	Not	Yes	Yes	Not	Always	Always	Never	Always	Never	Frequently	Always	Not	19 Sep 20	27.0552	7-11a	2	Not	Yes	Yes
353	1	Periphery of Cusco	29021	Fem	52	1	Not	Not	Not	Not	Not	Not	75	1.7	Yes	Not	Yes	Not	Not	Not	Not	Not	Not	Yes	Not	Always	Always	Never	Frequently	Never	Always	Always	Not	26 Sep 20	25.9516	12a+	2	Not	Not	Not
78	2	Periphery of Cusco	462B	Fem	73	2	Not	Not	Not	Not	Not	Not	62	1.5	Not	Not	Yes	Not	Not	Not	Not	Not	Not	Not	Not	Always	Always		Always		Always		Not	14 Sep 20	27.5556	7-11a	2	Not	Not	Not
2	2	Periphery of Cusco	22211	Masc	51	2	Not	Not	Not	Not	Not	Not	130	1.92	Not	Not	Not	Not	Not	Not	Not	Not	Not	Not	Not	Always	Always	Always	Always	Never	Always	Always	Not	14 Sep 20	35.2648	12a+	2	Not	Not	Not
478	1	Quillabamba	1027	Fem	60	1	Not	Not	Not	Not	Not	Not	85	1.59	Not	Not	Yes	Not	Not	Not	Not	Not	Not	Not	Not	Always	Always	Never	Never	Never	Always	Always	Yes	19 Sep 20	33.6221	7-11a	1	Not	Not	Not
403	1	Periphery of Cusco	-	Fem	43	2	Not	Not	Not	Not	Not	Not	90	1.6	Not	Not	Not	Not	Not	Not	Not	Not	Yes	Not	Not	Frequently	Frequently	Never	Sometimes	Never	Frequently	Frequently	Yes	27 Sep 20	35.1562	12a+	2	Not	Not	Not
137	2	Cusco	3115	Fem	72	2	Yes	Not	Not	Not	Not	Not	75	1.65	Not	Not	Not	Not	Not	Not	Not	Not	Not	Not	Not	Always	Always		Never	Never	Always	Always	Not	14 Sep 20	27.5482		2	Not	Not	Not
524	1	Cusco	45 ANT 06	Fem	85	2	Not	Not	Not	Not	Not	Not	60	1.53	Not	Not	Not	Not	Not	Yes	Not	Not	Not	Not	Not	Always	Frequently	Frequently	Never	Never	Always	Always	Not	20 Sep 20	25.6312	<7a	2	Not	Not	Not
529	1	Cusco	45ANT01	Fem	44	2	Not	Not	Not	Not	Not	Not	80	1.6	Yes	Yes	Not	Not	Not	Not	Not	Not	Yes	Not	Not	Always	Always	Always	Sometimes	Never	Always	Always	Yes	20 Sep 20	31.25	12a+	2	Not	Not	Not
564	1	Periphery of Cusco	5325	Fem	73	2	Not	Not	Not	Not	Not	Not	70	1.55	Not	Not	Not	Not	Not	Not	Not	Not	Yes	Yes	Not	Frequently	Always	Never	Frequently	Never	Always	Frequently	Not	20 Sep 20	29.1363	<7a	2	Not	Not	Not
39	1	Periphery of Cusco	9613	Masc	73	2	Not	Not	Not	Not	Not	Not	90	1.7	Yes	Not	Not	Not	Not	Not	Not	Not	Not	Not	Not	Frequently	Always	Never	Always	Never	Always	Frequently	Not	14 Sep 20	31.1419	<7a	2	Not	Not	Not
564	2	Periphery of Cusco	5325	Fem	24	2	Not	Not	Not	Not	Not	Not	51	1.55	Not	Not	Yes	Not	Yes	Yes	Not	Not	Yes	Yes	Not	Frequently	Always	Never	Frequently	Never	Always	Frequently	Not	20 Sep 20	21.2279	12a+	2	Not	Not	Not
120	1	Periphery of Cusco	4421	Fem	31	1	Not	Not	Not	Not	Not	Not	70	1.67	Not	Not	Not	Not	Not	Not	Not	Not	Yes	Not	Not	Always	Always	Sometimes	Sometimes	Sometimes	Always	Always	Not	14 Sep 20	25.0995	12a+	2	Not	Not	Not
175	1	Quillabamba	12	Fem	56	1	Not	Not	Not	Not	Not	Not	66	1.5	Not	Not	Not	Not	Not	Not	Not	Not	Not	Not	Not	Always	Always	Never	Always	Never	Always	Always	Not	14 Sep 20	29.3333	<7a	1	Not	Yes	Not
467	1	Quillabamba	1017	Masc	41	1	Not	Not	Not	Not	Not	Not	89	1.79	Not	Not	Not	Not	Not	Not	Not	Not	Not	Not	Not	Always	Always	Never	Never	Never	Always	Always	Not	19 Sep 20	27.7769	7-11a	2
718	1	Periphery of Cusco	45ME08	Masc	53	1	Not	Not	Not	Not	Not	Not	78	1.66	Not	Yes	Not	Not	Yes	Not	Yes	Not	Yes	Not	Not	Frequently	Frequently	Never	Sometimes	Never	Frequently	Frequently	Yes	27 Sep 20	28.306	7-11a	1	Not	Not	Not
170	1	Quillabamba	17	Fem	31	1	Not	Not	Not	Not	Not	Not	52	1.45	Not	Not	Not	Not	Not	Yes	Not	Yes	Not	Not	Not	Sometimes	Always	Never	Never	Never	Always	Always	Not	14 Sep 20	24.7325	7-11a	1	Not	Yes	Yes
241	1	Periphery of Cusco	5512	Masc	25	1	Not	Not	Not	Not	Not	Not			Not	Not	Not	Not	Not	Not	Not	Not	Yes	Not	Not	Frequently	Always	Never	Never	Never	Always	Always	Not	19 Sep 20		12a+	1	Not	Not	Yes
84	1	Periphery of Cusco	411B	Fem	25	1	Not	Not	Not	Not	Not	Not	70	1.65	Not	Not	Not	Not	Not	Not	Not	Not	Not	Not	Not	Always	Always	Never	Always	Sometimes	Always	Always	Not	14 Sep 20	25.7117	7-11a	1	Not	Not	Not
453	2	Quillabamba	1003	Masc	52	2	Yes	Not	Not	Not	Not	Not	95	1.7	Not	Not	Not	Not	Not	Not	Not	Not	Not	Not	Not	Always	Always	Never	Never	Never	Sometimes	Always	Yes	19 Sep 20	32.872	12a+	2	Not	Not	Not
403	2	Periphery of Cusco	-	Masc	22	2	Not	Not	Not	Not	Not	Not	70	1.63	Not	Not	Not	Not	Not	Not	Not	Not	Not	Not	Not	Frequently	Frequently	Never	Sometimes	Never	Frequently	Frequently	Not	27 Sep 20	26.3465	12a+	2	Not	Not	Not
351	1	Periphery of Cusco	29013	Masc	32	1	Not	Not	Not	Not	Not	Not	70	1.75	Not	Not	Not	Not	Not	Not	Not	Not	Not	Not	Not	Always	Always	Always	Always	Always	Always	Always	Not	26 Sep 20	22.8571	12a+	2	Not	Not	Not
511	1	Cusco	21k002	Fem	35	1	Not	Not	Not	Not	Not	Not	48	1.56	Yes	Yes	Yes	Not	Not	Not	Not	Yes	Yes	Yes	Not	Frequently	Always	Never	Always	Sometimes	Sometimes	Always	Yes	20 Sep 20	19.7239	12a+	1	Not	Not	Yes
267	1	Periphery of Cusco	62031	Fem	33	2	Not	Not	Not	Not	Not	Not	60	1.59	Not	Not	Not	Not	Not	Not	Not	Not	Not	Not	Not	Always	Always	Never	Sometimes	Never	Always	Always	Not	19 Sep 20	23.7332	12a+	1	Not	Not	Not
2	1	Periphery of Cusco	22211	Fem	77	2	Not	Not	Not	Not	Not	Not	65	1.6	Not	Not	Not	Not	Not	Not	Not	Not	Not	Not	Not	Always	Always	Always	Always	Never	Always	Always	Not	14 Sep 20	25.3906	12a+	2	Not	Not	Not
70	1	Periphery of Cusco	414C	Fem	51	2	Not	Not	Not	Not	Not	Not	76	1.65	Not	Not	Not	Not	Not	Not	Not	Not	Not	Not	Not	Always	Always	Never	Frequently	Never	Always	Always	Not	14 Sep 20	27.9155	12a+	2	Not	Not	Not
119	1	Periphery of Cusco	4421	Fem	42	1	Not	Not	Not	Not	Not	Not	60	1.55	Not	Not	Not	Not	Not	Not	Not	Not	Yes	Not	Not	Always	Always	Never	Always	Always	Always	Always	Not	14 Sep 20	24.974	12a+	1	Not	Not	Not
935	1	Quillabamba	44	Fem	45	1	Not	Not	Not	Not	Not	Not			Not	Not	Not	Not	Not	Not	Not	Not	Not	Not	Not	Always	Always	Never	Never	Never	Always	Always	Yes	20 Sep 20		7-11a	1	Not	Not	Not
59	1	Periphery of Cusco	224	Masc	34	2	Not	Not	Not	Not	Not	Not	80	1.79	Not	Not	Not	Not	Not	Not	Not	Not	Not	Not	Not	Always	Always				Always	Always	Not	14 Sep 20	24.968	12a+	2	Not	Not	Not
195	2	Quillabamba	Q195	Masc	26	2	Not	Not	Not	Not	Not	Not	80	1.74	Not	Yes	Not	Not	Not	Not	Not	Not	Not	Not	Not	Always	Always	Sometimes	Frequently	Never	Always	Always	Not	14 Sep 20	26.4236	12a+	2	Not	Not	Not
934	1	Quillabamba	43	Fem	55	1	Not	Not	Not	Not	Not	Not			Not	Not	Not	Not	Not	Not	Not	Not	Not	Not	Not	Always	Always	Never	Never	Never	Always	Always	Not	20 Sep 20		<7a	1	Not	Not	Not
348	2	Periphery of Cusco	29041	Fem	64	2	Not	Yes	Not	Not	Not	Not	69	1.65	Not	Not	Yes	Not	Not	Not	Not	Not	Yes	Yes	Not	Always	Always	Always	Always		Always	Always	Not	26 Sep 20	25.3443	12a+	2	Not	Not	Not
445	2	Quillabamba	3	Fem	50	2	Not	Not	Not	Not	Not	Not	67	1.53	Not	Not	Not	Not	Not	Not	Not	Not	Not	Not	Not	Always	Always	Never	Never	Never	Always	Always	Not	20 Sep 20	28.6215	12a+	2	Not	Not	Not
177	1	Quillabamba	10	Fem	49	2	Yes	Not	Not	Not	Not	Not	82	1.55	Not	Not	Not	Not	Not	Not	Not	Not	Not	Not	Not	Always	Always	Frequently	Always	Never	Always	Always	Yes	14 Sep 20	34.1311	7-11a	2	Yes	Not	Not
195	1	Quillabamba	Q195	Fem	26	2	Not	Not	Not	Not	Not	Not	50	1.57	Not	Not	Not	Not	Not	Not	Not	Not	Not	Not	Not	Always	Always	Sometimes	Sometimes	Sometimes	Sometimes	Always	Not	14 Sep 20	20.2848	12a+	2	Not	Not	Not
352	2	Periphery of Cusco	29023	Fem	64	2	Not	Not	Not	Not	Not	Not			Not	Not		Not	Not	Not	Not	Not	Not	Not	Not	Frequently	Always	Always	Frequently	Sometimes	Always	Always	Not	26 Sep 20		12a+	2	Not	Yes	Yes
358	1	Cusco	452B17	Fem	48	2	Not	Not	Not	Not	Not	Not	60	1.53	Not	Not	Yes	Not	Yes	Not	Not	Not	Not	Yes	Not	Always	Always	Never	Frequently	Never	Always	Always	Not	26 Sep 20	25.6312	7-11a	2	Not	Not	Not
552	2	Cusco	45ER12	Fem	35	2	Not	Not	Not	Not		Not	60	1.37	Not	Not	Not	Not	Not	Not	Not	Not	Not	Not	Not	Always	Always		Always		Always	Always	Not	20 Sep 20	31.9676	12a+	2	Not	Yes	Yes
401	1	Periphery of Cusco	50ME04	Masc	48	1	Not	Not	Not	Not	Not	Not	74	1.6	Not	Not	Yes	Not	Not	Not	Yes	Not	Yes	Yes	Not	Always	Always	Never	Sometimes	Never	Always	Always	Not	27 Sep 20	28.9062	12a+	1	Not	Not	Not
352	1	Periphery of Cusco	29023	Masc	62	2	Not	Not	Not	Not	Not	Not	75	1.72	Not	Not	Not	Yes	Not	Not	Not	Not	Yes	Not	Not	Always	Always	Always	Frequently	Sometimes	Always		Yes	26 Sep 20	25.3515	12a+	2	Not	Yes	Yes
108	1	Periphery of Cusco	3852	Fem	50	1	Not	Not	Not	Not	Not	Not	103	1.68	Yes	Yes	Yes	Not	Not	Yes	Yes	Yes	Yes	Yes	Not	Always	Always	Frequently	Frequently	Never	Always	Always	Not	14 Sep 20	36.4938	12a+	1	Not	Not	Not
126	1	Periphery of Cusco	9664	Fem	29	1	Not	Not	Not	Not	Not	Not	72	1.58	Not	Not	Not	Not	Not	Not	Not	Not	Not	Not	Not	Frequently	Always	Sometimes	Always	Never	Always	Always	Not	14 Sep 20	28.8415	7-11a	2	Yes	Not	Not
211	1	Quillabamba	Q211	Fem	28	1	Not	Not	Not	Not	Not	Not		1.55	Not	Not	Yes	Not	Not	Yes	Not	Yes	Yes	Yes	Not	Always	Always	Always	Sometimes	Sometimes	Always	Always	Not	14 Sep 20		12a+	1	Yes	Yes	Yes
702	1	Periphery of Cusco	45ME13	Masc	34	1	Not	Not	Not	Not		Not	90	1.89	Not	Not	Not	Not	Not	Yes	Not	Yes	Not	Yes	Not	Always	Always	Never	Never	Never	Always	Always	Not	27 Sep 20	25.1953	7-11a	2	Not	Not	Not
235	1	Periphery of Cusco	5562-B	Fem	50	1	Not	Not	Not	Not	Not	Not	67	1.63	Not	Not	Not	Not	Not	Not	Not	Not	Not	Not	Not	Always	Always	Frequently	Always	Sometimes	Frequently	Always	Not	19 Sep 20	25.2174	12a+	2	Not	Not	Not
281	1	Periphery of Cusco	62012	Masc	46	1	Not	Not	Not	Not	Not	Not	93	1.74	Yes	Yes	Yes	Not	Not	Not	Not	Not	Not	Not	Not	Always	Always	Never	Frequently	Never	Always	Always	Not	19 Sep 20	30.7174	7-11a	1	Not	Not	Not
268	1	Periphery of Cusco	62153	Masc	69	2	Not	Not	Not	Not	Not	Not	78	1.65	Yes	Yes	Not	Not	Not	Not	Yes	Yes	Yes	Not	Not	Always	Always	Never	Always	Never	Always	Always	Not	19 Sep 20	28.6501	12a+	2	Not	Not	Not
541	1	Cusco	45ER7	Fem	28	1	Not	Not	Not	Not	Not	Not	62	1.6	Not	Not	Not	Not	Not	Not	Not	Not	Not	Not	Not	Always	Always	Sometimes	Sometimes	Never	Always	Always	Not	20 Sep 20	24.2188	12a+	2	Not	Not	Not
306	1	Cusco	45ER28	Fem	47	1	Not	Not	Not	Not	Not	Not	57	1.48	Not	Not	Not	Not	Not	Not	Not	Not	Not	Yes	Not	Always	Always	Never	Frequently	Never	Always	Always	Yes	20 Sep 20	26.0226	7-11a	2	Yes	Not	Not
453	1	Quillabamba	1003	Masc	74	2	Yes	Yes	Not	Not	Not	Not	72	1.62	Not	Not	Not	Not	Not	Not	Not	Not	Yes	Not	Not	Always	Always	Never	Never	Never	Always	Always	Not	19 Sep 20	27.4348	7-11a	2	Not	Not	Not
166	1	Quillabamba	21	Fem	22	2	Not	Not	Not	Not	Not	Not	55	1.48	Not	Not	Not	Not	Not	Not	Not	Not	Not	Not	Not	Frequently	Frequently	Never	Never	Never	Always	Always	Yes	14 Sep 20	25.1096	12a+	2	Not	Not	Not
50	2	Cusco	3052	Fem	30	2	Not	Not	Not	Not	Not	Not	60	1.61	Not	Yes	Not	Not	Yes	Not	Not	Not	Yes	Not	Not	Always	Always	Never	Frequently	Never	Always	Always	Not	14 Sep 20	23.1472	12a+	2	Yes	Yes	Not
444	2	Quillabamba	2	Fem	42	2	Not	Not	Not	Not	Not	Not	60	1.47	Not	Not	Not	Not	Not	Not	Not	Not	Not	Not	Not	Always	Always	Never	Never	Never	Always	Always	Not	20 Sep 20	27.7662	12a+	2	Not	Not	Not
174	1	Quillabamba	13	Masc	54	1	Not	Not	Not	Not	Not	Not	68	1.66	Not	Not	Not	Not	Not	Not	Not	Not	Not	Not	Not	Frequently	Frequently	Frequently	Never	Never	Frequently	Frequently	Not	14 Sep 20	24.677	<7a	1	Not	Not	Not
297	1	Periphery of Cusco	S-297	Masc	24	1	Not	Not	Not	Not	Not	Not	65	1.74	Not	Not	Not	Not	Not	Not	Not	Not	Not	Not	Not	Always	Always		Always	Always	Always	Always	Not	20 Sep 20	21.4691	12a+	1	Not	Not	Not
177	2	Quillabamba	10	Masc	47	2	Not	Not	Not	Not	Not	Not	92	1.7	Not	Not	Not	Not	Not	Not	Not	Not	Not	Not	Not	Always	Always	Always	Never	Never	Always	Always	Yes	14 Sep 20	31.8339	7-11a	2	Yes	Not	Not
545	1	Cusco	45ER9-B	Masc	52	1	Not	Not	Not	Not	Not	Not	73	1.6	Not	Yes	Not	Not	Not	Not	Not	Not	Yes	Yes	Not	Always	Always	Sometimes	Sometimes	Never	Always	Always	Not	20 Sep 20	28.5156	<7a	2	Not	Not	Not
189	1	Quillabamba	Q189	Fem	55	1	Not	Yes	Not	Not	Not	Not			Not	Not	Not	Not	Not	Not	Not	Not	Not	Not	Not	Frequently	Always	Never	Never	Never	Always	Always	Not	14 Sep 20		7-11a	1	Not	Not
268	2	Periphery of Cusco	62153	Fem	64	2	Yes	Yes	Not	Not	Not	Not	64	1.5	Yes	Yes	Not	Not	Not	Not	Not	Not	Yes	Not	Not	Always	Always	Never	Frequently	Never	Always	Always	Not	19 Sep 20	28.4444	12a+	2	Not	Not	Not
251	1	Periphery of Cusco	62103	Fem	48	1	Not	Not	Not	Not	Not	Not	83	1.55	Not	Not	Not	Not	Not	Not	Not	Not	Not	Not	Not	Always	Always	Never	Sometimes	Never	Always	Always	Not	19 Sep 20	34.5474	7-11a	2	Not	Not	Not
14	1	Periphery of Cusco	32	Masc	22	1	Not	Not	Not	Not	Not	Not	60	1.55	Yes	Yes	Yes	Not	Yes	Not	Yes	Not	Not	Yes	Not	Sometimes	Frequently		Frequently		Frequently	Frequently	Not	14 Sep 20	24.974		1	Not	Not	Not
918	1	Quillabamba	27	Fem	40	2	Not	Not	Not	Not	Not	Not	63	1.59	Not	Not	Not	Not	Not	Not	Not	Not	Not	Not	Not	Always	Always	Never	Never	Never	Always	Always	Not	20 Sep 20	24.9199	7-11a	2	Not	Not	Not
808	1	Periphery of Cusco	4463-A	Fem	77	1	Yes	Not	Not	Not	Not	Yes	80	1.55	Yes	Not	Not	Not	Not	Not	Not	Not	Not	Not	Not		Always	Never					Yes	26 Sep 20	33.2987	<7a	1	Yes	Yes	Yes
86	1	Periphery of Cusco	411D	Fem	27	1	Not	Not	Not	Not	Not	Not	68	1.67	Yes	Yes	Not	Not	Not	Not	Not	Not	Not	Not	Not	Frequently	Always	Sometimes	Always	Never	Always	Always	Yes	14 Sep 20	24.3824	12a+	1	Not	Not	Not
265	2	Periphery of Cusco	77022	Fem	71	2	Not	Not	Not	Not	Not	Not	87	1.57	Not	Not	Not	Not	Not	Not	Not	Not	Not	Not	Not	Always	Always	Never	Frequently	Never	Always	Always	Not	19 Sep 20	35.2955	12a+	2	Not	Not	Not
562	1	Cusco	45-20-1	Fem	65	1	Not	Not	Not	Not	Not	Not	61	1.5	Not	Not	Yes	Not	Not	Not	Not	Not	Not	Yes	Not	Always	Always	Never	Frequently	Never	Always	Always	Not	20 Sep 20	27.1111	7-11a	2	Not	Not	Not
267	2	Periphery of Cusco	62031	Masc	26	2	Not	Not	Not	Not	Not	Not	74	1.68	Not	Not	Yes	Not	Not	Not	Not	Not	Not	Not	Not	Always	Always	Never	Sometimes	Never	Always	Always	Not	19 Sep 20	26.2188	12a+	1	Not	Not	Not
909	2	Quillabamba	18	Masc	45	2	Not	Not	Not	Not	Not	Not	65	1.6	Not	Not	Not	Not	Not	Not	Not	Not	Yes	Not	Not	Always	Always	Never	Never	Never	Always	Always	Not	20 Sep 20	25.3906	12a+	2	Not	Not	Not
358	2	Cusco	452B17	Fem	76	2	Not	Not	Not	Not	Not	Not	60	1.55	Not	Not	Not	Not	Not	Not	Not	Not	Not	Not	Not	Always	Always	Never	Sometimes	Never	Always	Always	Not	26 Sep 20	24.974	<7a	2	Not	Not	Not
445	1	Quillabamba	3	Masc	49	2	Not	Not	Not	Not	Not	Not	77	1.69	Yes	Not	Not	Not	Not	Not	Not	Not	Not	Not	Not	Always	Always	Never	Never	Never			Not	20 Sep 20	26.9598	12a+	2	Not	Not	Not
551	1	Cusco	45ER11	Fem	65	2	Not	Yes	Not	Not	Not	Not	70	1.56	Yes	Not	Not	Not	Not	Yes	Not	Not	Yes	Not	Not	Always	Always	Sometimes	Sometimes	Never	Always	Always	Yes	20 Sep 20	28.764	12a+	2	Not	Not	Not
546	1	Cusco	45ER9	Fem	37	1	Not	Not	Not	Not	Not	Not	58	1.56	Not	Not	Not	Not	Not	Not	Not	Not	Not	Not	Not	Always	Always	Sometimes	Sometimes	Never	Always	Always	Not	20 Sep 20	23.833	<7a	1	Not	Not	Not
925	2	Quillabamba	34	Fem	52	3	Not	Not	Not	Not	Not	Not	51	1.56	Not	Not	Not	Not	Not	Not	Not	Not	Not	Not	Not	Always	Always	Never	Never	Never	Always	Always	Yes	20 Sep 20	20.9566	12a+	2	Not	Not	Not
243	1	Periphery of Cusco	5531	Fem	25	1	Not	Not	Not	Not	Not	Not	62	1.55	Yes	Not	Not	Not	Not	Yes	Not	Not	Yes	Not	Not	Always	Always	Never	Always	Never	Always	Always	Not	19 Sep 20	25.8065	12a+	2	Not	Not	Not
348	1	Periphery of Cusco	29041	Fem	26	2	Not	Not	Not	Not	Not	Not	69	1.59	Not	Yes	Not	Not	Not	Not	Not	Not	Not	Not	Not	Always	Always	Always	Frequently	Sometimes	Always	Always	Not	26 Sep 20	27.2932	12a+	2	Not	Not	Not
316	1	Cusco	45ER18	Fem	23	2	Not	Not	Not	Not	Not	Not	50	1.57	Not	Yes	Not	Not	Not	Not	Not	Not	Not	Not	Not	Always	Always	Sometimes	Sometimes	Never	Always	Always	Not	20 Sep 20	20.2848	12a+	2	Not	Not	Not
82	2	Periphery of Cusco	453C	Masc	25	2	Not	Not	Not	Not	Not	Not	80	1.7	Not	Not	Not	Not	Not	Not	Not	Not	Not	Not	Not	Frequently	Always	Sometimes	Never	Never	Always	Always	Not	14 Sep 20	27.6817	7-11a	2	Not	Not	Not
153	2	Cusco	89-O	Fem	30	2	Not	Not	Not	Not	Not	Not	67	1.52	Not	Not	Not	Not	Not	Not	Not	Not	Not	Not	Not	Always	Always	Never	Always	Never	Always	Always	Not	14 Sep 20	28.9993	<7a	2	Not	Yes	Yes
454	2	Quillabamba	1004	Fem	59	2	Not	Not	Not	Not	Not	Not	74	1.61	Not	Not	Not	Not	Not	Not	Not	Not	Not	Not	Not	Frequently	Frequently	Never	Never	Never	Frequently	Always	Not	19 Sep 20	28.5483	<7a	2	Not	Not	Not
473	1	Quillabamba	1023	Masc	25	1	Not	Not	Not	Not	Not	Not	80	1.73	Yes	Yes	Yes	Not	Not	Not	Not	Not	Not	Not	Not	Always	Always	Never	Never	Never	Always	Always	Not	19 Sep 20	26.7299	12a+	2	Not	Not	Not
929	1	Quillabamba	38	Fem	57	1	Not	Not	Not	Not	Not	Not	74	1.49	Not	Not	Yes	Not	Not	Not	Not	Not	Not	Not	Not	Always	Always	Never	Never	Never			Not	20 Sep 20	33.3318	7-11a	2	Not	Not	Not
608	1	Periphery of Cusco	25-A-19	Masc	45	1	Not	Not	Not	Not	Not	Not	82	1.7	Not	Not	Not	Not	Not	Not	Not	Not	Not	Not	Not	Always	Frequently	Sometimes	Never	Never	Frequently	Always	Not	26 Sep 20	28.3737	7-11a	2	Not	Not	Not
831	1	Cusco	45KG09	Masc	56	2	Not	Not	Not	Not	Not	Not	83	1.59	Not	Not	Not	Not	Not	Not	Not	Not	Not	Not	Not	Always	Always	Never	Sometimes	Never	Always	Always	Not	27 Sep 20	32.831	7-11a	2	Not	Not	Not
31	1	Cusco	1182	Masc	41	1	Not	Not	Not	Not	Not	Not	68	1.65	Not	Not	Not	Not	Not	Not	Not	Not	Not	Not	Not	Always	Always	Always	Never	Never	Always	Always	Yes	14 Sep 20	24.977	12a+	1	Not	Not	Not
452	1	Quillabamba	1002	Fem	52	1	Not	Not	Not	Not	Not	Not	83	1.55	Yes	Not	Not	Not	Not	Not	Not	Not	Not	Not	Not	Frequently	Always	Never	Never	Never	Always	Always	Not	19 Sep 20	34.5474	12a+	1	Not	Not	Not
316	2	Cusco	45ER18	Masc	57	2	Not	Not	Not	Not	Not	Not	57	1.6	Not	Not	Not	Not	Not	Not	Not	Not	Not	Not	Not	Always	Always	Sometimes	Sometimes	Never	Always	Always	Not	20 Sep 20	22.2656	12a+	2	Not	Not	Not
1011- 429	1	Quillabamba	N3	Fem	51	2	Not	Not	Not	Not	Not	Not	54	1.52	Not	Not	Yes	Not	Not	Not	Not	Not	Not	Not	Not	Frequently	Always	Never	Sometimes	Sometimes	Sometimes	Always	Not	20 Sep 20	23.3726	12a+	2	Not	Not	Not
171	1	Quillabamba	16	Fem	52	1	Not	Not	Not	Not	Not	Not	65	1.58	Not	Not	Yes	Not	Not	Not	Not	Not	Not	Not	Not	Always	Always	Never	Never	Never	Always	Always	Not	14 Sep 20	26.0375	7-11a	1	Not	Not	Yes
332	1	Periphery of Cusco	5205	Fem	47	3	Not	Not	Not	Not	Not	Not	74	1.55	Yes	Not	Yes	Not	Yes	Not	Yes	Not	Yes	Not	Not	Frequently	Always	Never	Frequently	Never	Always	Always	Yes	25 Sep 20	30.8012	<7a	2	Not	Not	Not
524	2	Cusco	45 ANT 06	Fem	71	2	Yes	Not	Not	Not	Not	Not			Not	Yes	Not	Not	Not	Not	Yes	Not	Not	Not	Not	Always	Always	Sometimes	Sometimes	Never	Frequently	Frequently	Not	20 Sep 20		7-11a	2	Not	Not	Not
59	2	Periphery of Cusco	224	Fem	31	2	Not	Not	Not	Not	Not	Not	63	1.62	Not	Not	Not	Not	Not	Not	Not	Not	Not	Not	Not	Always	Always		Always		Always	Always	Not	14 Sep 20	24.0055	12a+	2	Not	Not	Not
831	2	Cusco	45KG09	Fem	26	2	Not	Not	Not	Not	Not	Not	68	1.7	Not	Yes	Not	Not	Not	Not	Not	Not	Not	Not	Not	Frequently	Frequently	Never	Sometimes	Never	Frequently	Frequently	Not	27 Sep 20	23.5294	12a+	2	Not	Not	Not
570	1	Periphery of Cusco	5353	Masc	60	1	Not	Not	Not	Not	Not	Not	68	1.71	Not	Not	Not	Not	Not	Not	Not	Not	Not	Not	Not	Always	Always	Never	Frequently	Never	Always	Always	Not	20 Sep 20	23.255	12a+	2	Not	Not	Not
153	1	Cusco	89-O	Fem	35	2	Not	Not	Not	Not	Not	Not	60	1.49	Not	Not	Not	Not	Not	Not	Not	Not	Not	Not	Not	Always	Always	Never	Always	Never	Always	Always	Not	14 Sep 20	27.0258	<7a	2	Not	Yes	Yes
509	1	Cusco	21k004	Masc	45	1	Not	Not	Not	Not	Not	Not	73	1.72	Yes	Yes	Yes	Yes	Yes	Not	Not	Not	Yes	Not	Not	Always	Always	Sometimes	Never	Sometimes	Always	Frequently	Not	20 Sep 20	24.6755	12a+	1	Not	Not	Not
69	1	Periphery of Cusco	414B	Fem	41	1	Not	Not	Not	Not	Not	Not	72	1.55	Not	Not	Not	Not	Not	Not	Not	Not	Not	Not	Not	Sometimes	Always	Never	Sometimes	Never	Always	Always	Not	14 Sep 20	29.9688	12a+	1	Not	Not	Not
51	2	Cusco	3053	Masc	28	2	Not	Not	Not	Not	Not	Not	62	1.6	Not	Not	Not	Not	Not	Not	Not	Not	Yes	Not	Not	Always	Always	Always	Always	Sometimes	Always	Frequently	Not	14 Sep 20	24.2188	12a+	2	Not	Not	Yes
371	2	Periphery of Cusco	25A18	Fem	55	2	Not	Not	Not	Not	Not	Not	65	1.5	Not	Yes	Not	Not	Not	Not	Not	Not	Yes	Not	Not	Always	Always	Never	Sometimes	Never	Always	Always	Not	26 Sep 20	28.8889	<7a	2	Not	Not	Not
70	2	Periphery of Cusco	414C	Fem	26	2	Not	Not	Not	Not	Not	Not	61	1.57	Yes	Yes	Not	Not	Yes	Yes	Not	Yes	Not	Not	Not	Always	Always	Never	Always	Never	Always	Always	Yes	14 Sep 20	24.7475	12a+	2	Not	Not	Not
551	2	Cusco	45ER11	Masc	72	2	Not	Not	Not	Not	Not	Not	70	1.73	Not	Not	Not	Not	Not	Yes	Not	Not	Yes	Yes	Not	Always	Always	Never	Sometimes	Never	Always	Always	Yes	20 Sep 20	23.3887		2	Not	Not	Not
91	1	Periphery of Cusco	411-I	Fem	25	1	Not	Not	Not	Not	Not	Not	54	1.54	Not	Not	Not	Not	Not	Not	Not	Not	Not	Not	Not	Always	Always	Never	Frequently	Never	Always	Always	Not	14 Sep 20	22.7694	12a+	1	Not	Not	Not
721	1	Periphery of Cusco	45ME10	Fem	40	1	Not	Not	Not	Not	Not	Not	79	1.5	Not	Yes	Not	Not	Not	Not	Yes	Not	Not	Not	Not	Always	Frequently	Never	Frequently	Never	Always	Frequently	Not	27 Sep 20	35.1111	12a+	2	Not	Not	Not
368	1	Cusco	452B27	Masc	49	1	Not	Not	Not	Not	Not	Not	70	1.57	Not	Not	Not	Not	Not	Not	Not	Not	Not	Not	Not	Always	Always	Never	Frequently	Never	Always	Always	Yes	26 Sep 20	28.3987	7-11a	3	Yes	Not	Not
52	3	Cusco	3041	Masc		3	Not	Not	Not	Not	Not	Not	77	1.72	Yes	Not	Not	Not	Not	Not	Not	Yes	Not	Not	Not	Always	Always	Never	Always	Never	Sometimes	Frequently	Not	14 Sep 20	26.0276	12a+	4	Yes	Not	Yes
818	1	Cusco	45kg01	Fem	49	1	Not	Not	Not	Not	Not	Not	70	1.59	Not	Yes	Not	Not	Not	Not	Not	Not	Not	Not	Not	Frequently	Sometimes	Never	Frequently	Sometimes	Frequently	Frequently	Not	27 Sep 20	27.6888	12a+	4	Yes	Not	Not
44	1	Cusco	1143B	Fem	20	3	Not	Not	Not	Not	Not	Not	67		Not	Not	Not	Not	Not	Not	Not	Not	Yes	Not	Not	Always	Always	Frequently	Always	Sometimes	Always	Always	Not	14 Sep 20		12a+	3	Not	Not	Not
248	1	Periphery of Cusco	5571	Fem	60	3	Not	Not	Not	Not	Not	Not	62	1.68	Not	Not	Not	Not	Not	Not	Not	Not	Yes	Yes	Not	Always	Always	Never	Always	Never	Always	Frequently	Not	19 Sep 20	21.9671	12a+	4	Not	Yes	Yes
48	1	Cusco	2023	Masc	20	3	Not	Not	Not	Not	Not	Not	81	1.79	Not	Not	Not	Not	Not	Not	Not	Not	Not	Not	Not	Frequently	Always		Sometimes	Never	Always	Always	Not	14 Sep 20	25.2801	12a+	3	Not	Not	Not
441	2	Periphery of Cusco	P441	Fem	43	2	Not	Not	Not	Not	Not	Not	80	1.6	Not	Not	Not	Not	Not	Not	Not	Not	Not	Not	Not	Always	Always	Always	Always	Always			Not	27 Sep 20	31.25	12a+	4	Not	Not	Not
203	4	Quillabamba	Q203	Masc	52	4	Not	Not	Not	Not	Not	Not	80	1.68	Not	Not	Not	Not	Not	Not	Not	Not	Not	Not	Not	Always	Always	Sometimes	Sometimes	Always	Always	Always	Not	14 Sep 20	28.3447	7-11a	4	Not	Not	Not
707	2	Periphery of Cusco	45ME12	Fem	53	3	Not	Not	Not	Not	Not	Not	55	1.51	Yes	Not	Not	Not	Not	Not	Not	Not	Yes	Not	Not	Sometimes	Frequently	Never	Sometimes	Never	Never	Frequently	Not	27 Sep 20	24.1217	<7a	3	Not	Not	Not
1001-419	1	Periphery of Cusco	1733	Fem	59	3	Yes	Not	Not	Not	Not	Not	65	1.59	Not	Not	Yes	Not	Not	Not	Not	Not	Yes	Not	Not	Always	Always	Frequently	Never	Never	Always	Always	Not	19 Sep 20	25.711	12a+	4	Not	Yes	Yes
390	2	Cusco	89	Masc	58	2	Not	Not	Not	Not	Not	Not	51	1.5	Not	Not	Not	Not	Not	Not	Not	Not	Not	Not	Not	Always	Always	Never					Not	27 Sep 20	22.6667	<7a	4	Not	Not	Not
193	1	Quillabamba	193.1.10	Masc	66	2	Not	Not	Not	Not	Not	Not	82	1.56	Not	Not	Not	Not	Not	Not	Not	Not	Not	Not	Not	Always	Always	Sometimes		Never	Always	Always	Not	14 Sep 20	33.6949	12a+	3	Not	Not	Not
71	1	Periphery of Cusco	414D	Masc	54	3	Not	Not	Not	Not	Not	Not	60	1.59	Not	Yes	Not	Not	Not	Not	Not	Not	Not	Not	Not	Always	Always	Always	Frequently	Never	Always	Always	Not	14 Sep 20	23.7332	12a+	3	Not	Not	Not
468	2	Quillabamba	1018	Masc	19	4	Not	Not	Not	Not	Not	Not	59	1.63	Not	Not	Not	Not	Not	Not	Not	Not	Not	Not	Not	Always	Always	Never	Never	Never	Always	Always	Not	19 Sep 20	22.2063	12a+	4	Not	Yes	Not
169	2	Quillabamba	18	Fem	44	2	Not	Not	Not	Not	Not	Not	59	1.5	Not	Not	Not	Not	Not	Not	Not	Not	Not	Not	Not	Always	Always	Never	Never	Never	Always	Always	Not	14 Sep 20	26.2222	7-11a	4	Not	Not	Not
122	1	Periphery of Cusco	4441	Masc	54	4	Not	Not	Not	Not	Not	Not	81	1.68	Not	Not	Yes	Not	Not	Yes	Not	Not	Not	Not	Not	Frequently	Always	Never	Never	Never	Always	Always	Yes	14 Sep 20	28.699	7-11a	5	Not	Yes	Yes
33	3	Cusco	1163	Masc	22	4	Not	Not	Not	Not	Not	Not	64	1.68	Not	Not	Not	Not	Not	Not	Not	Not	Yes	Yes	Not	Always	Always	Never	Always	Never	Always	Always	Not	14 Sep 20	22.6757	12a+	4	Yes	Yes	Yes
911	3	Quillabamba	20	Masc	40	3	Not	Not	Not	Not	Not	Not	86	1.7	Not	Not	Not	Not	Not	Not	Not	Not	Not	Not	Not	Always	Always	Never	Never	Never	Always	Always	Not	20 Sep 20	29.7578	7-11a	4	Not	Not	Not
71	2	Periphery of Cusco	414D	Fem	54	3	Not	Yes	Not	Not		Not	67	1.56	Not	Not	Not	Not	Yes	Not	Not	Not	Not	Not	Not	Always	Always	Never	Never	Never	Always	Always	Not	14 Sep 20	27.5312	12a+	3	Not	Not	Not
97	2	Periphery of Cusco	22273	Fem	36	2	Not	Not	Not	Not	Not	Not	62	1.6	Not	Not	Not	Not	Not	Not	Not	Not	Not	Not	Not	Frequently	Frequently	Never	Sometimes	Never	Frequently	Frequently	Not	14 Sep 20	24.2188	12a+	3	Not	Yes	Not
739	1	Cusco	45JL15	Masc	58	1	Not	Not	Not	Not	Not	Not	60	1.6	Not	Not	Not	Not	Not	Not	Not	Not	Not	Not	Not	Always	Always	Never	Frequently	Never	Always	Always	Yes	27 Sep 20	23.4375	12a+	4	Not	Not	Not
101	1	Periphery of Cusco	22262	Fem	44	2	Not	Not	Not	Not	Not	Not	60	1.6	Not	Not	Not	Not	Not	Not	Not	Not	Not	Not	Not	Always	Always	Never	Always	Never	Always	Always	Not	14 Sep 20	23.4375	12a+	4	Not	Not	Not
294	1	Periphery of Cusco	S-294	Masc	72	2	Not	Not	Not	Not	Not	Not	58	1.65	Not	Not	Not	Not	Not	Not	Not	Not	Not	Not	Not	Always	Always		Sometimes		Always	Always	Not	20 Sep 20	21.304	7-11a	3
277	2	Periphery of Cusco	66043	Masc	57	2	Not	Not	Not	Not	Not	Not	80	1.65	Not	Not	Not	Not	Not	Not	Not	Not	Not	Not	Not	Always	Always	Never	Frequently	Never	Always	Always	Not	19 Sep 20	29.3848	12a+	5	Not	Not	Yes
904	1	Quillabamba	13	Fem	79	3	Not	Not	Not	Not	Not	Not	65	1.49	Not	Not	Not	Not	Not	Not	Not	Not	Not	Not	Not	Always	Always	Never	Never	Never	Always	Always	Not	20 Sep 20	29.278	<7a	5	Not	Not	Not
443	1	Quillabamba	1	Fem	45	1	Not	Not	Not	Not	Not	Not	79	1.56	Not	Not	Not	Not	Not	Not	Not	Not	Not	Not	Not	Always	Always	Never	Never	Never	Always	Always	Not	20 Sep 20	32.4622	12a+	3	Not	Not	Not
134	1	Cusco	3133	Fem	45	2	Not	Not	Not	Not	Not	Not	67	1.6	Not	Not	Not	Not	Not	Not	Not	Not	Not	Not	Not	Always	Always	Sometimes	Always	Never	Always	Always	Not	14 Sep 20	26.1719	12a+	4	Not	Not	Not
25	2	Periphery of Cusco	49711	Fem	24	3	Not	Not	Not	Not	Not	Not	60	1.5	Not	Not	Not	Not	Not	Not	Not	Not	Not	Not	Not	Always	Always		Always		Always	Always	Yes	14 Sep 20	26.6667	12a+	5	Not	Yes	Yes
602	3	Periphery of Cusco	53-DE-29	Fem	60	3	Not	Not	Not	Not	Not	Not	92	1.6	Not	Not	Not	Not	Not	Not	Not	Not	Not	Not	Not	Always	Always	Never	Sometimes	Never	Always	Always	Not	27 Sep 20	35.9375	12a+	5	Yes	Yes	Yes
914	3	Quillabamba	23	Fem	18	5	Not	Not	Not	Not	Not	Not	56	1.6	Not	Not	Not	Not	Not	Not	Not	Not	Not	Not	Not	Always	Always	Never	Never	Never	Always	Always	Not	20 Sep 20	21.875	7-11a	5	Not	Not	Not
515	3	Cusco	5	Masc	25	3	Not	Not	Not	Not	Not	Not	70	1.7	Not	Yes	Not	Not	Not	Not	Not	Not	Not	Not	Not	Frequently	Always	Never	Sometimes	Never	Always	Frequently	Yes	20 Sep 20	24.2215	12a+	3	Not	Yes	Not
198	1	Quillabamba	-	Fem	46	2	Not	Not	Not	Not	Not	Not	76	1.56	Not	Not	Not	Not	Not	Not	Not	Not	Not	Not	Not	Always	Always	Sometimes	Sometimes	Never	Always	Always	Yes	14 Sep 20	31.2294	12a+	3	Not	Not	Not
566	1	Periphery of Cusco	5333	Fem	30	1	Not	Not	Not	Not	Not	Not	54	1.5	Yes	Yes	Yes	Not	Not	Not	Not	Yes	Yes	Not	Not	Always	Always	Never	Always	Never	Always	Always	Not	20 Sep 20	24	12a+	3	Not	Not	Not
919	3	Quillabamba	28	Fem	23	3	Not	Not	Not	Not	Not	Not	78	1.77	Not	Not	Not	Not	Not	Not	Not	Not	Not	Not	Not	Always	Always	Never	Never	Never	Always	Always	Yes	20 Sep 20	24.8971	12a+	4	Not	Not	Not
65	1	Periphery of Cusco	223	Masc	29	1	Not	Not	Not	Not	Not	Not	84	1.78	Not	Not	Not	Not	Not	Not	Not	Not	Not	Not	Not	Frequently	Frequently	Frequently	Frequently	Frequently	Frequently	Frequently	Not	14 Sep 20	26.5118	12a+	3	Not	Not	Not
940	2	Quillabamba	50	Masc	36	4	Not	Not	Not	Not	Not	Not	78	1.73	Not	Not	Not	Not	Not	Not	Not	Not	Not	Not	Not	Always	Always	Never	Never	Never	Always	Always	Not	20 Sep 20	26.0617	12a+	4	Not	Not	Not
77	1	Periphery of Cusco	462	Fem	20	2	Not	Not	Not	Not	Not	Not	65	1.62	Not	Not	Not	Not	Not	Not	Not	Not	Yes	Not	Not	Always	Sometimes	Sometimes	Sometimes	Never	Always	Always	Not	14 Sep 20	24.7676	<7a	4	Not	Not	Not
62	5	Periphery of Cusco	221	Masc	35	5	Not	Not	Not	Not	Not	Not	67	1.71	Not	Not	Not	Not	Not	Not	Not	Not	Not	Not	Not	Frequently	Frequently				Frequently	Frequently	Not	14 Sep 20	22.913	<7a	5	Yes	Not	Not
373	1	Periphery of Cusco	25A16	Fem	29	1	Not	Not	Not	Not	Not	Not	78	1.59	Not	Yes	Not	Not	Not	Not	Not	Not	Not	Not	Not	Frequently	Always	Frequently	Frequently	Never	Always	Sometimes	Yes	26 Sep 20	30.8532	12a+	5	Yes	Not	Not
68	1	Periphery of Cusco	413	Fem	39	2	Not	Not	Not	Not	Not	Not	65	1.58	Not	Not	Not	Not	Not	Not	Not	Not	Not	Not	Not	Always	Always	Always	Always	Always	Always	Always	Not	14 Sep 20	26.0375	12a+	4	Not	Yes	Not
930	2	Quillabamba	39	Fem	36	3	Not	Not	Not	Not	Not	Not			Not	Not	Yes	Not	Yes	Not	Yes	Not	Yes	Not	Not	Always	Always	Never	Never	Never			Not	20 Sep 20		12a+	4	Not	Not	Not
279	3	Periphery of Cusco	6253	Fem	22	3	Not	Not	Not	Not	Not	Not	46		Not	Not	Yes	Not	Not	Not	Not	Not	Not	Not	Not	Always	Always	Always	Always	Always	Always	Always	Yes	19 Sep 20		12a+	4	Yes	Yes	Yes
75	1	Periphery of Cusco	442B	Fem	30	2	Yes	Not	Not	Not	Not	Not	80	1.56	Not	Yes	Yes	Not	Not	Yes	Yes	Yes	Yes	Yes	Yes	Always	Always	Never	Sometimes	Never	Always	Always	Yes	14 Sep 20	32.8731	12a+	3	Not	Yes	Yes
543	1	Cusco	45ER6	Fem	20	3	Not	Not	Not	Not	Not	Not	58	1.56	Not	Yes	Not	Not	Not	Not	Not	Not	Not	Yes	Not	Always	Always	Sometimes	Sometimes	Always	Always	Always	Yes	20 Sep 20	23.833	12a+	3	Not	Not	Not
802	2	Periphery of Cusco	44021	Fem	46	3	Not	Not	Not	Yes	Not	Not	58	1.65	Not	Not	Not	Not	Not	Not	Not	Not	Yes	Not	Not	Always	Always	Always	Always	Never	Always	Always	Not	26 Sep 20	21.304	12a+	3	Not	Not	Not
67	2	Periphery of Cusco	414A	Masc	34	3	Not	Not	Not	Not	Not	Not	62	1.5	Not	Not	Not	Not	Not	Not	Not	Not	Not	Not	Not	Always	Always	Frequently	Always	Never	Always	Always	Not	14 Sep 20	27.5556	12a+	3	Not	Yes	Not
141	2	Cusco	89C	Fem	36	2	Not	Not	Not	Not	Not	Not	75	1.54	Not	Not	Not	Yes	Yes	Not	Not	Not	Yes	Yes	Yes	Always	Always	Frequently	Always	Never	Frequently	Always	Yes	14 Sep 20	31.6242	7-11a	5	Not	Yes	Yes
910	2	Quillabamba	19	Fem	21	5	Not	Not	Not	Not	Not	Not	64	1.68	Not	Not	Not	Not	Not	Not	Not	Not	Not	Not	Not	Always	Always	Never	Never	Never	Always	Always	Not	20 Sep 20	22.6757	12a+	5	Not	Not	Yes
550	1	Cusco	45ER10	Masc	33	2	Not	Not	Not	Not	Not	Not	68	1.6	Not	Not	Not	Not	Not	Not	Not	Not	Not	Yes	Not	Always	Always	Frequently	Sometimes	Never	Always	Always	Not	20 Sep 20	26.5625	12a+	4	Not	Not	Not
472	2	Quillabamba	1022	Fem	49	5	Not	Not	Not	Not	Not	Not	70	1.53	Yes	Not	Not	Not	Not	Not	Not	Not	Not	Not	Not	Always	Always	Never	Never	Never	Always	Always	Not	19 Sep 20	29.903	12a+	4	Not	Not	Not
920	1	Quillabamba	29	Fem	85	6	Yes	Not	Not	Not	Not	Not	60	1.45	Not	Not	Not	Not	Not	Not	Not	Not	Not	Not	Not	Always	Always	Never	Never	Never	Always	Always	Not	20 Sep 20	28.5374	<7a	5	Not	Not	Not
366	2	Cusco	452B25	Fem	24	3	Not	Not	Not	Not	Not	Not	70	1.55	Not	Yes	Not	Not	Not	Not	Not	Not	Not	Not	Not	Always	Always	Never	Sometimes	Never	Always	Always	Not	26 Sep 20	29.1363	12a+	3	Not	Not	Not
740	2	Cusco	45JL12	Fem	35	2	Not	Not	Not	Not	Not	Not	65	1.55	Not	Yes	Yes	Not	Not	Yes	Not	Yes	Not	Yes	Not	Always	Always		Sometimes	Sometimes	Always	Always	Not	27 Sep 20	27.0552	12a+	3	Not	Not	Not
920	5	Quillabamba	29	Fem	50	6	Not	Not	Not	Not	Not	Not	65	1.57	Not	Not	Not	Not	Not	Not	Not	Not	Not	Not	Not	Always	Always	Never	Never	Never	Always	Always	Not	20 Sep 20	26.3702	12a+	5	Not	Not	Not
616	1	Periphery of Cusco	25A27	Masc	54	1	Not	Not	Not	Not	Not	Not	77	1.56	Not	Yes	Yes	Not	Yes	Yes	Not	Not	Yes	Yes	Not	Always	Always	Frequently	Frequently	Sometimes	Always	Always	Not	26 Sep 20	31.6404	7-11a	3	Not	Not	Not
518	1	Cusco	_	Masc	21	1	Not	Not	Not	Not	Not	Not	76	1.78	Not	Not	Yes	Not	Not	Not	Yes	Not	Not	Not	Not	Frequently	Always	Sometimes		Never	Always	Always	Not	20 Sep 20	23.9869	12a+	5	Not	Yes	Not
719	1	Periphery of Cusco	45ME06	Masc	26	2	Not	Not	Not	Not	Not	Not	59	1.55	Not	Not	Not	Not	Not	Not	Not	Not	Not	Not	Not	Frequently	Frequently	Never	Sometimes	Never	Frequently	Frequently	Not	27 Sep 20	24.5577	7-11a	3	Not	Not	Not
259	2	Periphery of Cusco	1721	Masc	53	4	Not	Not	Not	Not	Not	Not	70	1.64	Not	Not	Not	Not	Not	Not	Not	Not	Not	Not	Not	Always	Always	Sometimes	Sometimes	Never	Always	Always	Not	19 Sep 20	26.0262	12a+	4	Not	Not	Not
208	1	Quillabamba	Q208	Fem	52	1	Not	Not	Not	Not	Not	Yes	68	1.59	Yes	Not	Not	Not	Not	Not	Not	Not	Not	Not	Not	Always	Always		Sometimes	Never	Frequently	Always	Not	14 Sep 20	26.8977	12a+	5	Yes	Not	Not
470	2	Quillabamba	1020	Masc	35	3	Not	Not	Not	Not	Not	Not	68	1.65	Yes	Not	Not	Not	Not	Not	Not	Not	Not	Not	Not	Always	Always	Never	Never	Never	Always	Always	Not	19 Sep 20	24.977	7-11a	5	Not	Not	Not
87	2	Periphery of Cusco	411E	Fem	23	2	Not	Not	Not	Not	Not	Not	52	1.47	Yes	Yes	Not	Not	Yes	Yes	Not	Not	Yes	Not	Not	Frequently	Always	Never	Always	Never	Always	Always	Not	14 Sep 20	24.0641	7-11a	3	Not	Not	Not
219	1	Periphery of Cusco	-	Fem	46	2	Not	Not	Not	Not	Not	Not	55	1.57	Not	Not	Not	Not	Not	Not	Not	Not	Yes	Not	Not	Always	Always		Sometimes	Never	Always	Always	Yes	18 Sep 20	22.3133	12a+	3	Not	Not	Not
926	3	Quillabamba	35	Masc	79	3	Not	Not	Not	Not	Not	Not	50	1.65	Yes	Not	Yes	Not	Not	Not	Not	Not	Not	Not	Not	Always	Always	Never	Never	Never	Always	Always	Not	20 Sep 20	18.3655	7-11a	3	Not	Not	Not
96	2	Periphery of Cusco	22273	Masc	65	2	Yes	Yes	Not	Not	Not	Not	80	1.65	Not	Not	Not	Not	Not	Not	Not	Not	Not	Not	Not	Always	Frequently	Never	Never	Never	Frequently	Frequently	Not	14 Sep 20	29.3848	12a+	3	Not	Yes	Not
520	1	Cusco	_	Fem	54	4	Not	Not	Not	Not	Not	Not	54	1.64	Not	Not	Not	Not	Not	Not	Yes	Not	Yes	Not	Not	Frequently	Always	Never	Always	Frequently	Always	Frequently	Yes	20 Sep 20	20.0773	7-11a	5	Not	Not	Not
159	1	Quillabamba	3	Masc	45	1	Not	Not	Not	Not	Not	Not	76	1.7	Not	Not	Not	Not	Not	Not	Not	Not	Not	Not	Not	Always	Always	Never	Never	Always	Always	Always	Not	14 Sep 20	26.2976	7-11a	4	Not	Not	Not
910	4	Quillabamba	19	Fem	30	5	Not	Not	Not	Not	Not	Not	78	1.55	Not	Not	Not	Not	Not	Not	Not	Not	Yes	Not	Not	Always	Always	Never	Never	Never	Always	Always	Not	20 Sep 20	32.4662	12a+	5	Not	Not	Yes
707	1	Periphery of Cusco	45ME12	Masc	72	3	Not	Not	Not	Not	Not	Not	58	1.52	Yes	Not	Yes	Not	Not	Not	Not	Yes	Yes	Not	Not	Sometimes	Frequently	Never	Sometimes	Never	Sometimes	Frequently	Not	27 Sep 20	25.1039	<7a	3	Not	Not	Not
197	4	Quillabamba	Q197	Fem	22	4	Not	Not	Not	Not	Not	Not	72	1.62	Not	Not	Not	Not	Not	Not	Not	Not	Not	Not	Not	Always	Always	Frequently	Never	Never	Never	Never	Not	14 Sep 20	27.4348	12a+	4	Not	Not	Not
309	2	Cusco	45ER20	Fem	46	2	Not	Not	Not	Not	Not	Not	80	1.5	Yes	Yes	Not	Not	Not	Not	Not	Not	Not	Yes	Not	Always	Always	Sometimes	Sometimes	Never	Always	Always	Yes	20 Sep 20	35.5556	12a+	5	Not	Yes	Yes
320	1	Cusco	89	Masc	71	4	Not	Not	Not	Not	Not	Not	57	1.45	Yes	Not	Not	Not	Yes	Yes	Not	Not	Yes	Not	Not	Always	Always	Never	Sometimes	Never	Always	Always	Not	20 Sep 20	27.1106	7-11a	5	Not	Not	Yes
344	1	Periphery of Cusco	2513	Fem	52	2	Not	Not	Not	Not	Not	Not	53	1.5	Not	Not	Not	Yes	Not	Not	Not	Not	Yes	Not	Not	Frequently	Frequently	Never	Sometimes	Never	Frequently	Frequently	Not	25 Sep 20	23.5556	7-11a	4	Not	Not	Not
346	1	Periphery of Cusco	2507B	Fem	31	2	Not	Not	Not	Not	Not	Not	68	1.55	Yes	Yes	Yes	Not	Yes	Yes	Not	Yes	Yes	Yes	Not	Always	Sometimes	Sometimes	Sometimes	Never	Always	Always	Yes	25 Sep 20	28.3039	<7a	4	Not	Not	Not
817	2	Cusco	25KG03	Masc	33	4	Not	Not	Not	Not	Not	Not	65	1.69	Yes	Not	Yes	Not	Not	Not	Not	Not	Not	Yes	Yes	Always	Always	Frequently	Frequently	Sometimes	Frequently	Always	Yes	27 Sep 20	22.7583	12a+	5	Not	Yes	Yes
366	1	Cusco	452B25	Masc	37	3	Not	Not	Not	Not	Not	Not	63	1.7	Not	Not	Not	Not	Not	Not	Not	Not	Not	Not	Not	Always	Always	Never	Never	Never	Always	Always	Not	26 Sep 20	21.7993	12a+	3	Not	Not	Not
732	2	Cusco	45JL01	Masc	21	5	Not	Not	Not	Not	Not	Not	70	1.79	Not	Yes	Not	Not	Not	Not	Not	Not	Not	Not	Not	Frequently	Frequently	Frequently	Sometimes	Sometimes	Frequently	Frequently	Not	27 Sep 20	21.847	7-11a	4	Not	Not	Not
920	6	Quillabamba	29	Masc	28	6	Not	Not	Not	Not	Not	Not	80	1.77	Not	Not	Not	Not	Not	Not	Not	Not	Not	Not	Not	Always	Always	Never	Never	Never	Always	Always	Not	20 Sep 20	25.5355	12a+	5	Not	Not	Not
908	1	Quillabamba	17	Masc	21	1	Not	Not	Not	Not	Not	Not	100	1.75	Not	Not	Yes	Not	Not	Not	Yes	Not	Yes	Not	Not	Always	Always	Never	Never	Never	Always	Always	Not	20 Sep 20	32.6531	12a+	3	Not	Not	Not
742	1	Cusco	45JL16	Fem	48	3	Yes	Not	Yes	Not	Not	Not	55	1.57	Not	Not	Not	Not	Not	Not	Not	Not	Not	Not	Not	Always	Always	Never	Sometimes	Never	Always	Always	Not	27 Sep 20	22.3133	7-11a	3	Not	Not	Not
309	1	Cusco	45ER20	Masc	50	2	Not	Not	Not	Not	Not	Not	65	1.64	Not	Not	Not	Not	Not	Not	Not	Not	Not	Not	Not	Always	Always	Never	Never	Never	Always	Always	Yes	20 Sep 20	24.1672	12a+	5	Not	Yes	Yes
400	2	Periphery of Cusco	50ME03	Masc	25	3	Not	Not	Not	Not	Not	Not	65	1.75	Not	Not	Not	Not	Not	Not	Not	Not	Not	Not	Not	Always	Always	Never	Frequently	Never	Always	Always	Not	27 Sep 20	21.2245	12a+	5	Not	Yes	Yes
389	1	Cusco	89	Masc	26	2	Not	Not	Not	Not	Not	Not	72	1.68	Not	Yes	Yes	Yes	Yes	Yes	Not	Not	Yes	Yes	Not	Frequently	Always	Sometimes		Never	Frequently	Frequently	Not	27 Sep 20	25.5102	12a+	4	Not	Yes	Not
283	1	Periphery of Cusco	1712	Masc	23	3	Not	Not	Not	Not	Not	Not	71	1.73	Not	Not	Not	Not	Not	Not	Not	Not	Not	Not	Not	Always	Always	Sometimes	Never	Never	Always	Always	Not	19 Sep 20	23.7228	12a+	4	Not	Yes	Yes
536	2	Cusco	45ER1	Masc	88	4	Yes	Yes	Not	Not	Not	Not	65	1.56	Yes	Yes	Not	Not	Not	Not	Not	Not	Not	Not	Not	Always	Always	Never	Sometimes	Never	Always	Always	Not	20 Sep 20	26.7094		5	Not	Not	Not
190	2	Quillabamba	-	Masc	35	2	Not	Not	Not	Not	Not	Not	65	1.6	Not	Not	Yes	Not	Not	Not	Not	Not	Yes	Not	Not	Always	Always	Never	Frequently	Never	Frequently	Always	Yes	14 Sep 20	25.3906	7-11a	4	Not	Yes	Not
502	1	Cusco	21.1.A	Fem	55	3	Not	Not	Not	Not	Not	Not	58	1.55	Not	Not	Not	Not	Not	Not	Not	Not	Not	Not	Not	Always	Always	Never	Always	Sometimes	Always	Always	Not	20 Sep 20	24.1415	7-11a	3	Not	Yes	Not
603	1	Periphery of Cusco	53-DR-28	Masc	66	4	Not	Not	Not	Not	Not	Not	86	1.7	Not	Not	Not	Not	Not	Not	Not	Not	Yes	Not	Not	Always	Always	Never	Sometimes	Never	Always	Always	Yes	27 Sep 20	29.7578	12a+	5	Yes	Yes	Yes
745	2	Cusco	45JL05	Fem	40	2	Not	Not	Not	Not	Not	Not	60	1.6	Not	Yes	Not	Not	Not	Not	Not	Not	Yes	Not	Not	Always	Always	Never	Sometimes	Never	Always	Always	Not	27 Sep 20	23.4375	12a+	5	Not	Not	Not
602	2	Periphery of Cusco	53-DE-29	Fem	28	3	Not	Not	Not	Not	Not	Not	60	1.6	Not	Not	Yes	Not	Not	Not	Not	Not	Yes	Not	Not	Always	Always	Sometimes	Frequently	Never	Always	Always	Yes	27 Sep 20	23.4375	12a+	5	Yes	Yes	Yes
532	2	Cusco	45ANT07	Masc	21	2	Not	Not	Not	Not	Not	Not	67	1.72	Not	Not	Not	Not	Not	Not	Not	Not	Not	Not	Not	Always	Always	Always	Always	Always	Always	Always	Not	20 Sep 20	22.6474	12a+	3	Not	Not	Not
748	1	Periphery of Cusco	45DR27	Fem	40	1	Not	Not	Not	Yes	Not	Not	59	1.53	Not	Yes	Not	Not	Not	Not	Not	Not	Not	Not	Not	Always	Always	Never	Frequently	Never	Always	Always	Not	27 Sep 20	25.204	7-11a	5	Not	Not	Not
717	1	Periphery of Cusco	45ME07	Masc	50	2	Not	Not	Not	Not	Not	Not	64	1.65	Yes	Not	Not	Yes	Yes	Yes	Not	Not	Yes	Yes	Yes	Frequently	Frequently	Never	Sometimes	Never	Frequently	Frequently	Yes	27 Sep 20	23.5078	7-11a	5	Not	Yes	Yes
913	2	Quillabamba	22	Masc	51	2	Not	Not	Not	Not	Not	Not	82	1.64	Yes	Yes	Not	Not	Not	Not	Not	Not	Yes	Not	Not	Always	Always	Never	Never	Never	Always	Always	Not	20 Sep 20	30.4878	12a+	3	Not	Not	Yes
418	1	Periphery of Cusco	53KG6	Masc	42	1	Not	Not	Not	Not	Not	Not	72	1.64	Not	Yes	Yes	Yes	Not	Not	Yes	Yes	Yes	Not	Yes	Always	Always	Always	Always	Always	Always	Always	Yes	27 Sep 20	26.7698		5	Not	Not	Not
613	1	Periphery of Cusco	25-A-24	Masc	44	1	Not	Not	Not	Not	Not	Not	90	1.75	Not	Not	Not	Not	Not	Not	Not	Not	Not	Not	Not	Always	Always		Always		Always	Always	Not	26 Sep 20	29.3878	12a+	5		Yes	Not
468	1	Quillabamba	1018	Masc	26	4	Not	Not	Not	Not	Not	Not	72	1.7	Not	Not	Not	Not	Not	Not	Not	Not	Not	Not	Not	Always	Always	Never	Never	Never	Always	Always	Yes	19 Sep 20	24.9135	12a+	4	Not	Yes	Not
73	1	Periphery of Cusco	443	Fem	75	4	Not	Not	Not	Not	Not	Not	70	1.56	Not	Not	Not	Not	Yes	Yes	Not	Not	Not	Not	Not	Always	Sometimes	Never	Frequently	Sometimes	Always	Always	Yes	14 Sep 20	28.764	<7a	5	Not	Not	Not
376	3	Periphery of Cusco	25A12	Masc	28	3	Not	Not	Not	Not	Not	Not	80	1.68	Not	Yes	Not	Yes	Not	Not	Not	Not	Yes	Not	Not	Frequently	Always	Frequently	Sometimes	Never	Always	Frequently	Yes	26 Sep 20	28.3447	12a+	5	Not	Not	Not
412	1	Periphery of Cusco	53KG3	Fem	18	3	Not	Not	Not	Not	Not	Not	90	1.58	Not	Not	Not	Not	Not	Not	Not	Not	Not	Not	Not	Always	Always	Never	Always	Sometimes	Always	Frequently	Not	27 Sep 20	36.0519	7-11a	5	Not	Not	Not
301	2	Cusco	45ER26	Fem	73	3	Not	Not	Not	Not	Not	Not	50	1.56	Yes	Yes	Not	Not	Not	Not	Not	Not	Not	Not	Not	Always	Always	Never	Sometimes	Never	Always	Always	Yes	20 Sep 20	20.5457	7-11a	3	Yes	Not	Not
713	1	Periphery of Cusco	45ME01	Masc	55	3	Not	Not	Not	Not	Not	Not	75	1.75	Not	Yes	Not	Not	Not	Not	Not	Not	Not	Yes	Not	Frequently	Frequently	Never	Never	Never	Frequently	Frequently	Yes	27 Sep 20	24.4898	7-11a	4	Not	Not	Not
1	1	Periphery of Cusco	22223	Fem	38	2	Not	Not	Not	Not	Not	Not	64	1.64	Not	Not	Not	Not	Not	Not	Not	Not	Yes	Not	Not	Frequently	Always	Never	Sometimes	Never	Frequently	Always	Not	14 Sep 20	23.7954	12a+	4	Not	Yes	Yes
80	1	Periphery of Cusco	453A	Masc	58	2	Not	Not	Not	Not	Not	Not	58	1.57	Not	Not	Yes	Not	Not	Not	Not	Not	Not	Not	Not	Always	Always	Never	Always	Never	Always	Always	Not	14 Sep 20	23.5304	12a+	4	Not	Not	Not
803	3	Periphery of Cusco	4422	Masc	22	3	Not	Not	Not	Not	Not	Not	70	1.7	Not	Not	Not	Not	Not	Not	Not	Not	Not	Not	Not	Always	Always	Never	Sometimes	Never	Always	Always	Not	26 Sep 20	24.2215	12a+	5	Not	Not	Not
543	3	Cusco	45ER6	Fem	48	3	Not	Not	Not	Not	Not	Not	47	1.76	Not	Yes	Not	Not	Not	Not	Not	Not	Yes	Not	Not	Always	Always	Never	Sometimes	Never	Always	Always	Yes	20 Sep 20	15.173	7-11a	3	Not	Not	Not
385	1	Periphery of Cusco	25A06	Masc	45	4	Not	Not	Not	Not	Not	Not	80	1.73	Not	Not	Not	Not	Not	Yes	Not	Not	Yes	Not	Not	Frequently	Frequently		Frequently		Frequently	Frequently	Not	26 Sep 20	26.7299	12a+	5	Not	Not	Not
416	1	Periphery of Cusco	53K02	Fem	45	2	Not	Not	Not	Not	Not	Not	60	1.52	Not	Not	Not	Not	Not	Not	Not	Not	Not	Not	Not	Always	Always	Sometimes	Sometimes	Never	Always	Always	Not	27 Sep 20	25.9695	12a+	4	Not	Not	Not
915	1	Quillabamba	24	Fem	32	1	Not	Not	Not	Not	Not	Not	55	1.49	Not	Not	Not	Not	Not	Not	Not	Not	Not	Not	Not	Always	Always	Never	Never	Never	Always	Always	Not	20 Sep 20	24.7737	12a+	3	Not	Yes	Yes
44	2	Cusco	1143B	Masc	22	3	Not	Not	Not	Not	Not	Not	65	1.6	Not	Not	Not	Not	Not	Not	Not	Not	Not	Not	Not	Always	Always	Never	Never	Never	Always	Always	Not	14 Sep 20	25.3906	12a+	3	Not	Not	Not
132	2	Periphery of Cusco	4442	Fem	22	2	Not	Not	Not	Not	Not	Not	53	1.56	Not	Yes	Not	Not	Not	Not	Not	Not	Not	Not	Not	Always	Always	Frequently	Sometimes	Never	Always	Always	Not	14 Sep 20	21.7784	12a+	4	Not	Not	Yes
225	1	Periphery of Cusco	S-225	Fem	62	3	Not	Not	Not	Not	Not	Not	62	1.59	Not	Not	Not	Not	Not	Not	Not	Not	Not	Not	Not	Always	Always		Sometimes	Always	Always		Not	18 Sep 20	24.5243	12a+	4	Not	Not	Not
820	1	Cusco	45kg04	Masc	60	3	Yes	Not	Not	Not	Not	Not	60	1.5	Not	Not	Not	Not	Not	Not	Not	Not	Not	Not	Not	Always	Always	Sometimes	Sometimes	Sometimes	Always	Always	Not	27 Sep 20	26.6667	7-11a	3	Not	Not	Yes
104	2	Cusco	3171	Fem	41	2	Not	Not	Not	Not	Not	Not	70	1.6	Not	Not	Not	Not	Not	Not	Not	Not	Yes	Not	Not	Frequently	Always	Never	Sometimes	Sometimes	Frequently	Frequently	Not	14 Sep 20	27.3438	12a+	4	Not	Not	Not
604	2	Periphery of Cusco	29-JR-01	Masc	66	2	Not	Not	Not	Not	Not	Not	80	1.68	Not	Not	Yes	Not	Not	Not	Not	Not	Yes	Not	Not	Frequently	Frequently	Sometimes	Sometimes	Never	Frequently	Frequently	Not	27 Sep 20	28.3447	12a+	4	Not	Not	Not
26	1	Periphery of Cusco	49712	Masc	51	2	Yes	Not	Not	Not	Not	Not	140	1.68	Yes	Yes	Not	Not	Not	Yes	Not	Yes	Yes	Yes	Not	Frequently	Frequently	Frequently	Frequently	Frequently	Frequently	Frequently	Not	14 Sep 20	49.6032	12a+	3	Not	Not	Yes
138	2	Cusco	3172	Masc	70	2	Yes	Not	Not	Not	Not	Not	70	1.76	Not	Not	Not	Not	Not	Not	Not	Not	Not	Not	Not	Always	Always	Never	Never	Never	Always	Always	Not	14 Sep 20	22.5981		3	Yes	Not	Not
274	2	Periphery of Cusco	77044	Fem	50	3	Not	Not	Not	Not	Not	Not	60	1.64	Not	Not	Not	Not	Not	Not	Not	Not	Yes	Not	Not	Always	Always	Never	Never	Frequently	Always		Not	19 Sep 20	22.3082	12a+	3	Not	Not	Not
331	2	Periphery of Cusco	2501B	Fem	40	3	Not	Not	Not	Not	Not	Not	63	1.59	Not	Not	Not	Not	Yes	Not	Not	Not	Yes	Yes	Not	Frequently	Always	Never	Frequently	Never	Always	Always	Yes	25 Sep 20	24.9199	7-11a	5	Not	Yes	Yes
1002-420	1	Periphery of Cusco	1743	Masc	51	2	Not	Not	Not	Not	Not	Not	60	1.65	Not	Yes	Yes	Not	Not	Not	Not	Not	Yes	Not	Not	Always	Always	Never	Sometimes	Never	Always	Always	Yes	19 Sep 20	22.0386	7-11a	4	Not	Yes	Yes
157	1	Cusco	89S	Masc	55	2	Not	Not	Not	Not	Not	Not	69	1.55	Not	Yes	Yes	Not	Not	Yes	Not	Not	Not	Not	Not	Always	Always	Always	Always	Always	Always	Always	Not	14 Sep 20	28.7201		5	Not	Yes	Not
127	2	Periphery of Cusco	6351	Fem	55	4	Not	Not	Not	Not	Not	Not	82	1.67	Not	Not	Not	Not	Not	Not	Not	Not	Not	Not	Not	Always	Frequently	Always	Frequently	Always	Always	Always	Not	14 Sep 20	29.4023	12a+	4	Not	Yes	Yes
187	2	Quillabamba	2B	Masc	32	2	Not	Not	Not	Not	Not	Not	75	1.75	Not	Not	Not	Not	Not	Not	Not	Not	Not	Not	Not	Always	Always	Never	Never	Never	Always	Always	Not	14 Sep 20	24.4898	12a+	3	Not	Not	Not
200	1	Quillabamba	Q200	Fem	31	5	Not	Not	Not	Not	Not	Not	60	1.56	Not	Not	Not	Not	Yes	Yes	Not	Not	Not	Not	Not	Always	Always	Never	Never	Never	Always	Always	Not	14 Sep 20	24.6548	12a+	5	Not	Not	Not
25	1	Periphery of Cusco	49711	Fem	48	3	Not	Not	Not	Not	Not	Not	89	1.55	Not	Not	Not	Not	Not	Not	Not	Not	Yes	Not	Not	Always	Frequently	Always		Frequently	Always		Yes	14 Sep 20	37.0448	7-11a	5	Not	Yes	Yes
233	1	Periphery of Cusco	8393	Masc	24	1	Not	Not	Not	Not	Not	Not	60	1.64	Not	Not	Not	Not	Not	Not	Not	Not	Not	Not	Not	Always	Always	Always	Frequently	Never	Always	Always	Not	18 Sep 20	22.3082	12a+	3	Not	Yes	Yes
416	2	Periphery of Cusco	53K02	Masc	45	2	Not	Not	Not	Not	Not	Not	86	1.75	Not	Not	Not	Not	Not	Not	Not	Not	Not	Not	Not	Always	Always	Sometimes	Sometimes	Never	Always	Always	Not	27 Sep 20	28.0816	12a+	4	Not	Not	Not
601	1	Periphery of Cusco	50-DR-30	Fem	56	2	Not	Not	Not	Not	Not	Not	65	1.49	Not	Not	Not	Not	Not	Not	Not	Not	Not	Not	Not	Always	Always	Sometimes	Frequently	Never	Always	Always	Not	27 Sep 20	29.278	7-11a	4	Not	Not	Not
160	1	Quillabamba	4	Fem	41	2	Not	Not	Not	Not	Not	Not	65	1.57	Not	Not	Not	Not	Not	Not	Not	Not	Not	Not	Not	Always	Always	Never	Never	Never	Always	Always	Not	14 Sep 20	26.3702	12a+	3	Not	Not	Not
318	2	Cusco	45ER20	Fem	31	2	Not	Not	Not	Not	Not	Not	69	1.53	Yes	Yes	Yes	Not	Yes	Yes	Yes	Not	Yes	Yes	Not	Always	Always	Always	Always	Always	Always	Always	Yes	20 Sep 20	29.4758	12a+	3	Not	Yes	Yes
77	2	Periphery of Cusco	462	Masc	31	2	Not	Not	Not	Not	Not	Not	73	1.64	Yes	Yes	Not	Not	Yes	Not	Not	Not	Yes	Not	Not	Always	Always	Never	Frequently	Never	Always	Always	Yes	14 Sep 20	27.1416	12a+	4	Not	Not	Not
414	4	Periphery of Cusco	50KG02	Fem		4	Not	Not	Not	Not	Not	Not	55	1.55	Not	Not	Not	Not	Not	Not	Not	Not	Not	Not	Not	Always	Always	Sometimes	Sometimes	Never	Always	Always	Not	27 Sep 20	22.8928	7-11a	5	Not	Not	Not
743	1	Cusco	45JL14	Fem	49	2	Not	Not	Not	Not	Not	Not	68	1.6	Not	Not	Yes	Not	Not	Not	Not	Not	Not	Not	Not	Always	Always	Never	Always	Never	Always	Always	Not	27 Sep 20	26.5625	12a+	3	Not	Not	Not
8	3	Periphery of Cusco	22243	Fem	32	3	Not	Not	Not	Not	Not	Not	60	1.47	Not	Not	Not	Not	Not	Not	Not	Not	Not	Not	Not	Always	Always		Always		Always	Always	Yes	14 Sep 20	27.7662	7-11a	4	Not	Not	Not
1004-422	1	Periphery of Cusco	1731	Masc	48	1	Not	Yes	Not	Not	Not	Not	70	1.65	Yes	Not	Yes	Not	Not	Not	Not	Not	Yes	Not	Not	Always	Always	Sometimes	Sometimes	Sometimes	Always	Always	Yes	19 Sep 20	25.7117	12a+	4	Not	Yes	Yes
465	1	Quillabamba	1015	Fem	46	3	Not	Not	Not	Not	Not	Not	50	1.5	Not	Not	Not	Not	Not	Not	Not	Not	Yes	Not	Not	Always	Always	Never	Never	Never	Always	Always	Yes	19 Sep 20	22.2222	<7a	3	Not	Yes	Yes
36	1	Periphery of Cusco	3883	Masc	68	2	Not	Not	Not	Not	Not	Not	80	1.62	Yes	Yes	Yes	Not	Yes	Not	Not	Yes	Not	Not	Not	Frequently	Always	Never	Frequently	Never	Always	Always	Not	14 Sep 20	30.4832	7-11a	3	Not	Not	Not
914	1	Quillabamba	23	Masc	42	5	Yes	Not	Not	Not	Not	Not	100	1.75	Not	Not	Not	Not	Not	Not	Not	Not	Not	Not	Not	Always	Always	Never	Never	Never	Always	Always	Not	20 Sep 20	32.6531	12a+	5	Not	Not	Not
106	2	Periphery of Cusco	3851	Fem	32	3	Not	Not	Not	Not	Not	Yes	84	1.51	Not	Not	Not	Not	Not	Not	Not	Not	Not	Not	Not	Frequently	Always	Never	Always	Never	Always	Always	Not	14 Sep 20	36.8405	12a+	3	Not	Not	Not
402	1	Periphery of Cusco	-	Fem	59	3	Not	Not	Not	Not	Not	Not	64	1.5	Not	Yes	Yes	Not	Not	Not	Yes	Not	Not	Not	Not	Frequently	Frequently	Never	Sometimes	Never	Frequently	Frequently	Not	27 Sep 20	28.4444	12a+	5	Not	Yes	Yes
275	2	Periphery of Cusco	77031	Fem	49	3	Not	Not	Not	Not	Not	Not	74	1.67	Not	Not	Not	Not	Not	Not	Not	Not	Not	Not	Not	Always	Always		Sometimes	Sometimes	Always	Always	Not	19 Sep 20	26.5338	12a+	5	Not	Not	Not
379	1	Periphery of Cusco	25A09	Fem	29	1	Not	Not	Not	Not	Not	Not	65	1.52	Yes	Yes	Yes	Yes	Not	Yes	Yes	Yes	Not	Not	Not	Frequently	Frequently	Never	Frequently	Never	Always	Frequently	Yes	26 Sep 20	28.1337	7-11a	3	Not	Not	Not
200	4	Quillabamba	Q200	Masc	36	5	Not	Not	Not	Not		Not	82	1.7	Not	Not	Not	Not	Not	Not	Not	Not	Not	Not	Not	Always	Always	Never	Never	Never	Always	Always	Not	14 Sep 20	28.3737	12a+	5	Not	Not	Not
278	4	Periphery of Cusco	1713B	Fem	44	4	Not	Not	Not	Not	Not	Not	62	1.6	Not	Not	Not	Not	Not	Not	Not	Not	Yes	Not	Not	Always	Always	Never	Sometimes	Sometimes	Always	Always	Not	19 Sep 20	24.2188	12a+	5	Not	Not	Not
43	1	Cusco	1143A	Fem	28	3	Not	Not	Not	Not	Not	Not	50	1.58	Not	Not	Not	Not	Not	Not	Not	Not	Not	Not	Not	Always	Always	Never	Always	Never	Always	Always	Not	14 Sep 20	20.0288	12a+	4	Not	Not	Yes
67	3	Periphery of Cusco	414A	Fem	29	3	Not	Not	Not	Not	Not	Not	55	1.56	Not	Not	Not	Not	Yes	Not	Yes	Not	Not	Yes	Not	Always	Always	Never	Frequently	Never	Always	Always	Yes	14 Sep 20	22.6003	12a+	3	Not	Yes	Not
234	2	Periphery of Cusco	8352	Masc	19	2	Not	Not	Not	Not	Not	Not	70	1.7	Not	Not	Not	Not	Not	Not	Not	Not	Not	Not	Not								Not	18 Sep 20	24.2215	7-11a	3	Not	Not	Not
21	1	Cusco	3113	Masc	53	2	Not	Not	Not	Not	Not	Not	82	1.87	Not	Not	Not	Not	Yes	Not	Not	Not	Not	Not	Not	Always	Always	Always	Always		Always	Always	Yes	14 Sep 20	23.4493	12a+	4	Not	Not	Not
413	2	Periphery of Cusco	53KG4	Fem	47	3	Not	Not	Not	Not	Not	Not	59	1.58	Yes	Not	Yes	Not	Not	Yes	Not	Yes	Yes	Yes	Yes	Always	Always		Always	Frequently	Always	Always	Yes	27 Sep 20	23.634	12a+	3	Not	Not	Not
537	3	Cusco	45ER2	Fem	22	4	Not	Not	Not	Not	Not	Not	65	1.57	Not	Yes	Not	Not	Not	Not	Not	Not	Not	Not	Not	Always	Always	Never	Sometimes	Never	Always	Always	Not	20 Sep 20	26.3702	12a+	5	Not	Not	Not
614	3	Periphery of Cusco	24A25	Fem	81	3	Not	Not	Not	Not	Not	Not	60	1.55	Not	Not	Not	Not	Not	Not	Not	Not	Not	Not	Not	Frequently	Frequently	Sometimes	Sometimes	Sometimes	Frequently	Always	Yes	26 Sep 20	24.974	<7a	5	Not	Not	Yes
475	1	Quillabamba	1025	Fem	45	3	Not	Not	Not	Not	Not	Not	62	1.55	Yes	Yes	Yes	Yes	Yes	Yes	Yes	Yes	Yes	Yes	Not	Frequently	Frequently	Never	Never	Never	Always	Always	Yes	19 Sep 20	25.8065	12a+	5	Not	Yes	Yes
209	1	Quillabamba	Q209	Fem	65	3	Not	Not	Yes	Not	Not	Not	55	1.6	Not	Not	Not	Not	Not	Not	Not	Not	Not	Not	Not	Always	Always	Always	Always	Always	Always	Always	Not	14 Sep 20	21.4844		3	Not	Yes	Yes
191	1	Quillabamba	191.1.10	Fem	28	2	Not	Not	Not	Not	Not	Not	79	1.56	Not	Not	Not	Not	Not	Not	Not	Not	Not	Not	Not	Always	Always	Never	Sometimes	Sometimes	Always	Always	Not	14 Sep 20	32.4622	7-11a	4	Not	Not	Not
135	2	Cusco	3132	Masc	43	2	Not	Not	Not	Not	Not	Not	78	1.68	Not	Not	Not	Not	Not	Not	Not	Not	Not	Yes	Not	Frequently	Always	Always	Always	Always	Always	Always	Not	14 Sep 20	27.6361	<7a	4	Not	Not	Not
825	4	Cusco	45kg9	Fem	30	5	Not	Not	Not	Not	Not	Not	48		Not	Not	Not	Not	Not	Not	Not	Not	Yes	Not	Not	Always	Always	Never	Frequently	Never	Always	Always	Yes	27 Sep 20		12a+	3	Not	Not	Yes
90	2	Periphery of Cusco	411H	Fem	30	2	Not	Not	Not	Not	Not	Not	52	1.6	Not	Not	Not	Not	Not	Not	Not	Not	Not	Not	Not	Always	Always		Always	Always	Always	Always	Not	14 Sep 20	20.3125	12a+	3	Not	Not	Not
531	5	Cusco	45ANT08	Fem	37	7	Not	Not	Not	Not	Not	Not	53	1.62	Not	Not	Not	Not	Not	Not	Not	Not	Not	Not	Not	Always	Always	Sometimes	Sometimes	Sometimes	Always	Always	Yes	20 Sep 20	20.1951	12a+	4	Not	Yes	Yes
122	3	Periphery of Cusco	4441	Masc	21	4	Not	Not	Not	Not	Not	Not	70	1.6	Not	Not	Not	Not	Not	Not	Not	Not	Not	Not	Yes	Frequently	Always	Never	Never	Never	Always	Always	Yes	14 Sep 20	27.3438	7-11a	5	Not	Yes	Yes
919	2	Quillabamba	28	Fem	85	3	Not	Not	Not	Not	Not	Not	54	1.55	Not	Not	Not	Not	Not	Not	Not	Not	Not	Not	Not	Always	Always	Never	Never	Never	Always	Always	Yes	20 Sep 20	22.4766	<7a	4	Not	Not	Not
366	3	Cusco	452B25	Fem	60	3	Not	Not	Not	Not	Not	Not	70	1.58	Not	Not	Not	Not	Not	Not	Not	Not	Not	Not	Not	Always	Always	Never	Frequently	Never	Always	Always	Not	26 Sep 20	28.0404	12a+	3	Not	Not	Not
301	1	Cusco	45ER26	Fem	49	3	Not	Not	Not	Not	Not	Not	56	1.5	Not	Yes	Not	Not	Not	Not	Not	Not	Not	Yes	Not	Always	Always	Sometimes	Sometimes	Never	Always	Always	Yes	20 Sep 20	24.8889	7-11a	3	Yes	Not	Not
344	2	Periphery of Cusco	2513	Masc	32	2	Not	Not	Not	Not	Not	Not	50	1.45	Yes	Yes	Not	Not	Not	Not	Not	Not	Not	Not	Not	Always	Always	Never	Never	Never			Not	25 Sep 20	23.7812	<7a	4	Not	Not	Not
181	1	Quillabamba	6	Fem	56	2	Not	Not	Not	Not	Not	Not	68	1.7	Yes	Not	Not	Not	Not	Not	Not	Not	Not	Not	Not	Always	Always	Never	Never	Never	Always	Always	Yes	14 Sep 20	23.5294	12a+	4	Not	Yes	Yes
732	1	Cusco	45JL01	Fem	51	5	Not	Not	Not	Not	Not	Not	61	1.58	Not	Not	Not	Not	Not	Not	Yes	Not	Not	Not	Not	Always	Always	Never	Sometimes	Never	Always	Frequently	Not	27 Sep 20	24.4352	12a+	4	Not	Not	Not
825	5	Cusco	45kg9	Masc	37	5	Not	Not	Not	Not	Not	Not	75	1.7	Not	Not	Not	Not	Not	Yes	Not	Not	Not	Yes	Yes	Frequently	Frequently	Never	Sometimes	Never	Frequently	Always	Yes	27 Sep 20	25.9516	12a+	3	Not	Not	Yes
380	1	Periphery of Cusco	25A01	Fem	27	1	Not	Not	Not	Not	Not	Not	60	1.57	Not	Not	Not	Not	Not	Not	Not	Yes	Not	Not	Not	Always	Always	Never	Frequently	Never	Always	Always	Yes	26 Sep 20	24.3418	12a+	4	Not	Not	Not
936	1	Quillabamba	45	Fem	30	4	Not	Not	Not	Not	Not	Not			Not	Not	Yes	Not	Not	Not	Not	Not	Yes	Not	Not	Always	Always	Never	Never	Never	Always	Always	Not	20 Sep 20		12a+	5	Not	Not	Not
475	3	Quillabamba	1025	Fem	65	3	Yes	Not	Not	Not	Not	Not	60	1.5	Yes	Not	Not	Not	Not	Not	Not	Not	Not	Not	Not								Not	19 Sep 20	26.6667	<7a	5	Not	Yes	Yes
33	1	Cusco	1163	Masc	58	4	Not	Not	Not	Not	Not	Not	79	1.68	Not	Yes	Not	Not	Not	Not	Not	Not	Yes	Not	Not	Always	Always	Never	Always	Never	Frequently	Always	Not	14 Sep 20	27.9904	12a+	4	Yes	Yes	Yes
733	3	Cusco	45JL07	Fem	30	3	Not	Not	Not	Not	Not	Not	85	1.7	Not	Not	Not	Not	Not	Not	Not	Not	Not	Not	Not	Always	Always	Always	Always	Always	Always	Always	Not	27 Sep 20	29.4118	12a+	4	Not	Not	Not
412	3	Periphery of Cusco	53KG3	Fem	45	3	Not	Not	Not	Not	Not	Not	103	1.65	Not	Not	Not	Not	Not	Not	Not	Not	Not	Not	Not	Always	Always		Always		Always	Always	Not	27 Sep 20	37.8329	12a+	5	Not	Not	Not
282	1	Periphery of Cusco	1711	Fem	42	3	Not	Not	Not	Not	Not	Not	68	1.49	Not	Not	Not	Not	Not	Not	Not	Not	Not	Not	Not	Always	Always	Sometimes	Always	Never	Always	Always	Not	19 Sep 20	30.6292	7-11a	5	Not	Not	Not
136	3	Cusco	3116	Fem	27	3	Not	Not	Not	Not	Not	Not	49	1.5	Not	Not	Yes	Not	Not	Not	Not	Not	Yes	Not	Not	Always	Always	Sometimes	Frequently	Sometimes	Always	Always	Not	14 Sep 20	21.7778	12a+	4	Not	Not	Not
248	3	Periphery of Cusco	5571	Fem	26	3	Not	Not	Not	Not	Not	Not	57	1.58	Not	Yes	Not	Not	Not	Not	Not	Yes	Yes	Yes	Not	Always	Always	Never	Never	Never	Always	Always	Not	19 Sep 20	22.8329	12a+	4	Not	Yes	Yes
176	3	Quillabamba	11	Fem	21	3	Not	Not	Not	Not	Not	Not	60	1.55	Not	Not	Not	Not	Not	Yes	Not	Not	Not	Not	Not	Always	Always	Frequently	Always	Never	Always	Always	Not	14 Sep 20	24.974	12a+	4	Not	Not	Not
514	2	Cusco	514.1.10	Fem	32	4	Not	Not	Not	Not	Not	Not	64	1.58	Yes	Not	Not	Not	Not	Not	Not	Not	Yes	Not	Yes	Always	Always	Never	Always	Never	Always	Always	Yes	20 Sep 20	25.6369	12a+	4	Not	Yes	Not
400	1	Periphery of Cusco	50ME03	Fem	25	3	Not	Not	Not	Not	Not	Not	50	1.63	Not	Not	Not	Not	Not	Not	Not	Not	Not	Not	Not	Frequently	Frequently	Never	Sometimes	Never	Frequently	Frequently	Not	27 Sep 20	18.8189	12a+	5	Not	Yes	Yes
481	2	Quillabamba	1030	Fem	36	2	Not	Not	Not	Not	Not	Not	50	1.5	Not	Not	Not	Not	Not	Not	Not	Not	Not	Not	Not	Always	Always	Never	Never	Never	Always	Always	Not	19 Sep 20	22.2222	12a+	3	Not	Not	Not
319	1	Cusco	45ER20	Fem	42	1	Not	Not	Not	Not	Not	Not	69	1.5	Not	Yes	Yes	Not	Yes	Yes	Not	Not	Not	Not	Not	Frequently	Frequently		Never	Never	Always	Frequently	Not	20 Sep 20	30.6667	12a+	5	Not	Yes	Yes
733	2	Cusco	45JL07	Fem	67	3	Yes	Not	Not	Not	Not	Not	65	1.55	Not	Not	Not	Not	Not	Not	Not	Not	Not	Not	Not	Always	Always	Never	Frequently	Sometimes	Always	Always	Not	27 Sep 20	27.0552	12a+	4	Not	Not	Not
52	1	Cusco	3041	Fem	70	3	Not	Not	Not	Not	Not	Not	66	1.57	Not	Not	Not	Not	Not	Not	Not	Not	Not	Not	Not	Always	Always	Never	Always	Never	Always	Always	Not	14 Sep 20	26.7759	12a+	4	Yes	Not	Yes
936	2	Quillabamba	45	Masc	70	4	Not	Yes	Not	Not		Not			Not	Not	Yes	Not	Not	Not	Not	Not	Yes	Not	Not	Always	Always	Never	Never	Never	Always	Always	Not	20 Sep 20		7-11a	5	Not	Not	Not
1009-427	1	Cusco	45ER15	Masc	44	4	Not	Not	Not	Not	Not	Not	80	1.7	Not	Yes	Not	Not	Not	Not	Not	Not	Yes	Yes	Not	Always	Always	Sometimes	Sometimes	Never	Always	Always	Not	20 Sep 20	27.6817	12a+	5	Not	Not	Not
93	2	Periphery of Cusco	22242B	Fem	31	2	Not	Not	Not	Not	Not	Not	48	1.5	Not	Not	Not	Not	Not	Not	Not	Not	Not	Not	Not	Frequently	Always	Never	Frequently		Frequently	Frequently	Yes	14 Sep 20	21.3333	12a+	5
294	2	Periphery of Cusco	S-294	Masc	35	2	Not	Not	Not	Not	Not	Not	75	1.78	Not	Not	Not	Not	Not	Not	Not	Not	Not	Not	Not	Always	Always		Sometimes		Always	Always	Not	20 Sep 20	23.6713	12a+	3
225	3	Periphery of Cusco	S-225	Masc	28	3	Not	Not	Not	Not	Not	Not			Not	Not	Not	Not	Not	Not	Not	Not	Not	Not	Not	Always	Always				Always	Always	Not	18 Sep 20		12a+	4	Not	Not	Not
728	1	Cusco	45DR20	Masc	71	2	Not	Yes	Not	Not	Yes	Not	68	1.65	Not	Not	Not	Not	Not	Not	Not	Not	Not	Not	Not	Always	Always	Never	Frequently	Never	Always	Always	Not	27 Sep 20	24.977	7-11a	3	Not	Not	Not
525	3	Cusco	45 ANT 05	Fem	35	5	Not	Not	Not	Not	Not	Not	70	1.5	Not	Not	Not	Not	Not	Not	Not	Yes	Yes	Not	Not	Always	Always	Never	Sometimes	Never	Frequently	Always	Yes	20 Sep 20	31.1111	12a+	5	Not	Not	Not
746	3	Cusco	45JL03	Fem	35	3	Not	Not	Not	Not	Not	Not	75	1.62	Not	Yes	Yes	Not	Yes	Not	Yes	Not	Yes	Not	Not	Always	Always	Sometimes	Always		Always	Always	Not	27 Sep 20	28.578	7-11a	5	Not	Not	Not
572	4	Periphery of Cusco	83033	Masc	29	4	Not	Not	Not	Not	Not	Not	76	1.7	Not	Not	Not	Not	Not	Not	Not	Not	Not	Not	Not	Always	Always		Always		Always	Always	Yes	20 Sep 20	26.2976	12a+	4	Not	Not	Not
905	5	Quillabamba	14	Fem	52	5	Not	Not	Not	Not	Not	Not	65	1.55	Not	Yes	Not	Not	Yes	Yes	Yes	Not	Yes	Not	Not	Always	Always	Never	Never	Never	Always	Always	Not	20 Sep 20	27.0552	12a+	5	Not	Not	Not
92	2	Periphery of Cusco	22242A	Fem		2	Not	Not	Not	Not	Not	Not	60	1.42	Not	Not	Not	Not	Not	Not	Not	Not	Not	Not	Not	Sometimes	Frequently	Never	Frequently	Never	Frequently	Frequently	Not	14 Sep 20	29.756	7-11a	5	Not	Not	Not
732	4	Cusco	45JL01	Masc	60	5	Not	Not	Not	Not	Not	Not	80	1.65	Yes	Not	Not	Not	Not	Not	Not	Not	Not	Not	Not	Always	Always	Frequently	Never	Frequently	Always	Always	Not	27 Sep 20	29.3848	12a+	4	Not	Not	Not
100	2	Periphery of Cusco	22271	Fem	41	3	Not	Not	Not	Not	Not	Not	65	1.55	Not	Not	Not	Not	Not	Not	Not	Not	Yes	Not	Yes	Frequently	Frequently	Never	Frequently	Never	Frequently	Frequently	Yes	14 Sep 20	27.0552	12a+	4	Not	Not	Not
936	3	Quillabamba	45	Fem	65	4	Not	Yes	Not	Not		Not			Not	Not	Yes	Not	Not	Not	Not	Not	Not	Not	Not	Always	Always	Never	Never	Never	Always	Always	Not	20 Sep 20			5	Not	Not	Not
941	2	Quillabamba	51	Masc	60	5	Not	Not	Not	Not	Not	Not	78	1.6	Not	Not	Not	Not	Not	Not	Not	Not	Not	Not	Not	Always	Always	Never	Never	Never	Always	Always	Not	20 Sep 20	30.4688	7-11a	5	Not	Not	Not
390	1	Cusco	89	Masc	58	2	Not	Not	Not	Not	Not	Not	69	1.62	Not	Not	Not	Not	Not	Not	Not	Not	Not	Not	Not	Always	Always	Never	Always		Always	Sometimes	Not	27 Sep 20	26.2917	7-11a	4	Not	Not	Not
73	4	Periphery of Cusco	443	Masc	77	4	Not	Not	Not	Not	Not	Not	75	1.56	Yes	Yes	Yes	Not	Yes	Yes	Not	Not	Not	Not	Not	Always	Always	Never	Never	Sometimes	Always	Always	Yes	14 Sep 20	30.8185	<7a	5	Not	Not	Not
121	2	Periphery of Cusco	4423	Fem	66	3	Not	Not	Not	Not	Not	Not	60	1.52	Not	Not	Yes	Not	Not	Not	Not	Not	Not	Not	Not	Always	Always	Never	Sometimes	Never	Always	Always	Not	14 Sep 20	25.9695	7-11a	5	Not	Not	Not
172	1	Quillabamba	15	Masc	47	3	Not	Not	Not	Not	Not	Not	94	1.68	Not	Yes	Not	Not	Not	Not	Yes	Not	Yes	Not	Not	Always	Always	Never	Never	Never	Always	Always	Not	14 Sep 20	33.305	7-11a	4	Not	Not	Not
197	1	Quillabamba	Q197	Fem	62	4	Yes	Not	Not	Not	Not	Not			Not	Not	Not	Not	Not	Not	Not	Not	Not	Not	Not	Always	Always	Sometimes	Sometimes	Never	Always	Always	Yes	14 Sep 20		12a+	4	Not	Not	Not
292	1	Cusco	21ant01	Fem	64	3	Not	Yes	Not	Not		Not	68	1.55	Yes	Yes	Not	Not	Not	Not	Yes	Not	Yes	Not	Not	Always	Always	Always	Always	Never	Always	Always	Not	20 Sep 20	28.3039	12a+	3	Not	Yes	Yes
803	1	Periphery of Cusco	4422	Fem	59	3	Yes	Not	Not	Not	Not	Not	50	1.57	Not	Not	Not	Not	Not	Not	Not	Not	Yes	Not	Not	Always		Always	Always		Frequently	Always	Not	26 Sep 20	20.2848	7-11a	5	Not	Not	Not
906	1	Quillabamba	15	Fem	54	2	Not	Yes	Not	Not	Not	Not	56	1.6	Yes	Yes	Not	Not	Yes	Yes	Not	Not	Not	Not	Not	Always	Always	Never	Never	Never	Always	Always	Not	20 Sep 20	21.875	7-11a	4	Not	Yes	Not
482	2	Quillabamba	1031	Fem	22	3	Not	Not	Not	Not	Not	Not	48	1.52	Not	Not	Not	Not	Not	Not	Not	Not	Not	Not	Not	Always	Always	Never	Never	Never	Always	Always	Not	19 Sep 20	20.7756	12a+	3	Not	Not	Not
1012 -431	1	Quillabamba	N5	Fem	27	2	Not	Not	Not	Not	Not	Not	71	1.6	Not	Yes	Yes	Not	Not	Yes	Not	Not	Yes	Not	Not	Frequently	Always	Never	Sometimes	Never	Frequently	Always	Not	20 Sep 20	27.7344	12a+	3	Not	Not	Not
90	1	Periphery of Cusco	411H	Masc	24	2	Not	Not	Not	Not	Not	Not	55	1.7	Not	Not	Not	Not	Not	Not	Not	Not	Not	Not	Not		Always		Always	Always	Always	Always	Not	14 Sep 20	19.0311	12a+	3	Not	Not	Not
374	1	Periphery of Cusco	25A15	Masc	47	1	Not	Not	Not	Not	Not	Not	68	1.6	Yes	Yes	Yes	Yes	Yes	Yes	Not	Yes	Yes	Yes	Yes	Never	Never		Never	Sometimes	Never		Yes	26 Sep 20	26.5625	7-11a	5	Not	Yes	Yes
912	3	Quillabamba	21	Fem	53	4	Not	Yes	Not	Not	Not	Not	100	1.55	Not	Not	Not	Not	Not	Not	Not	Not	Not	Not	Not	Always	Always	Never	Never	Never			Not	20 Sep 20	41.6233	7-11a	5	Not	Not	Not
54	2	Periphery of Cusco	4463A	Fem	37	2	Not	Not	Not	Not	Not	Not	65	1.55	Not	Not	Not	Not	Not	Not	Not	Not	Not	Not	Not	Always	Always	Never	Sometimes	Never	Always	Always	Not	14 Sep 20	27.0552	12a+	4	Not	Not	Not
412	2	Periphery of Cusco	53KG3	Masc	46	3	Not	Not	Not	Not	Not	Not		1.67	Not	Not	Not	Not	Not	Not	Not	Not	Not	Not	Not	Always	Always	Never	Always	Never	Always	Always	Not	27 Sep 20		12a+	5	Not	Not	Not
93	1	Periphery of Cusco	22242B	Masc	25	2	Not	Not	Not	Not	Not	Not	90	1.65	Not	Not	Not	Not	Not	Not	Not	Not	Not	Not	Not	Frequently	Frequently	Never	Never	Never	Frequently	Frequently	Not	14 Sep 20	33.0579	<7a	5
312	1	Cusco	45ER22	Masc	54	4	Not	Not	Not	Not	Not	Not	88	1.66	Not	Not	Not	Not	Not	Not	Not	Not	Not	Not	Not	Always	Always	Sometimes	Sometimes	Frequently	Always	Always	Not	20 Sep 20	31.935	12a+	4	Not	Yes	Yes
556	1	Cusco	556.1.10	Fem	51	3	Not	Not	Not	Not	Not	Not	45	1.5	Not	Yes	Not	Not	Not	Not	Not	Not	Yes	Not	Not	Always	Always	Sometimes	Frequently	Never	Always	Always	Not	20 Sep 20	20	12a+	3	Not	Not	Not
225	2	Periphery of Cusco	S-225	Masc	69	3	Yes	Not	Not	Not	Not	Not	72	1.73	Not	Not	Not	Not	Not	Not	Not	Not	Not	Not	Not	Always	Always				Always	Always	Not	18 Sep 20	24.0569	12a+	4	Not	Not	Not
260	1	Periphery of Cusco	62111	Fem	30	3	Not	Not	Not	Not	Not	Not	69	1.6	Not	Yes	Yes	Yes	Yes	Yes	Not	Not	Yes	Not	Yes	Always	Always	Never	Frequently	Never	Always	Always	Yes	19 Sep 20	26.9531	12a+	4	Not	Not	Not
216	2	Periphery of Cusco	216-N-1.10	Masc	26	2	Not	Not	Not	Not	Not	Not	98	1.82	Not	Not	Yes	Not	Not	Not	Not	Not	Yes	Not	Not	Always	Always	Sometimes	Sometimes	Never	Always	Always	Not	18 Sep 20	29.5858	12a+	3	Not	Not	Yes
572	2	Periphery of Cusco	83033	Fem	54	4	Yes	Not	Yes	Not	Not	Yes	75	1.6	Yes	Not	Yes	Yes	Not	Not	Not	Not	Yes	Not	Not	Always	Always	Never	Always	Never	Always	Frequently	Yes	20 Sep 20	29.2969	12a+	4	Not	Not	Not
466	1	Quillabamba	1016	Fem	33	1	Not	Not	Not	Not	Not	Not	67	1.6	Not	Yes	Not	Not	Not	Not	Yes	Yes	Not	Not	Not	Always	Always	Never	Never	Never	Always	Always	Not	19 Sep 20	26.1719	7-11a	5	Not	Not	Yes
360	2	Cusco	452B19	Fem	53	3	Not	Not	Not	Not	Not	Not	82	1.56	Not	Not	Not	Not	Not	Not	Not	Not	Not	Not	Not	Always	Always	Never	Never	Never	Always	Always	Yes	26 Sep 20	33.6949	7-11a	5
53	4	Periphery of Cusco	4453	Fem	41	4	Not	Not	Not	Not	Not	Not	76	1.6	Not	Not	Not	Not	Not	Not	Not	Not	Not	Not	Not	Always	Always	Never	Sometimes	Sometimes	Always	Always	Not	14 Sep 20	29.6875	12a+	4	Not	Yes	Yes
712	2	Periphery of Cusco	45M302	Fem	42	2	Not	Not	Not	Not	Not	Not	97	1.56	Yes	Yes	Not	Not	Yes	Yes	Yes	Not	Yes	Yes	Not	Frequently	Frequently	Never	Sometimes	Never	Frequently	Frequently	Yes	27 Sep 20	39.8586	7-11a	4	Not	Not	Not
626	1	Periphery of Cusco	2SA37	Fem	50	1	Not	Not	Not	Not	Not	Not	50	1.53	Not	Not	Not	Not	Not	Yes	Not	Not	Yes	Yes	Not	Always	Always	Never	Sometimes	Never	Always	Always	Yes	26 Sep 20	21.3593	<7a	4	Not	Yes	Yes
904	2	Quillabamba	13	Fem	42	3	Not	Not	Not	Not	Not	Not	68	1.52	Not	Not	Not	Not	Not	Not	Not	Not	Not	Not	Not	Always	Always	Never	Never	Never	Always	Always	Not	20 Sep 20	29.4321	12a+	5	Not	Not	Not
716	2	Periphery of Cusco	45ME09B	Fem	41	2	Not	Not	Not	Not	Not	Not	83	1.64	Not	Not	Not	Not	Not	Not	Yes	Yes	Yes	Yes	Not	Frequently	Frequently	Sometimes	Sometimes	Never	Always	Always	Not	27 Sep 20	30.8596	12a+	5	Not	Yes	Yes
365	2	Cusco	452B24	Masc	32	2	Not	Not	Not	Not	Not	Not	71	1.71	Not	Not	Not	Not	Not	Not	Not	Not	Not	Yes	Not	Always	Always	Never	Frequently	Never	Always	Always	Yes	26 Sep 20	24.281	7-11a	5	Yes	Not	Yes
920	3	Quillabamba	29	Fem	63	6	Not	Not	Not	Not	Not	Not	83	1.55	Not	Not	Not	Not	Not	Not	Not	Not	Not	Not	Not	Always	Always	Never	Never	Never	Always	Always	Not	19 Sep 20	34.5474	7-11a	5	Not	Not	Not
79	1	Periphery of Cusco	452	Masc	19	3	Not	Not	Not	Not	Not	Not	62	1.7	Not	Not	Not	Not	Not	Not	Not	Not	Not	Not	Not	Always	Always	Never	Always	Always	Always	Always	Not	14 Sep 20	21.4533	7-11a	3	Not	Not	Not
525	1	Cusco	45 ANT 05	Fem	57	5	Not	Not	Not	Not	Not	Not	71	1.55	Not	Not	Not	Not	Yes	Yes	Not	Not	Yes	Not	Not	Always	Always	Never	Always	Never	Always	Always	Yes	20 Sep 20	29.5526	7-11a	5	Not	Not	Not
809	1	Periphery of Cusco	4462	Fem	61	1	Not	Not	Not	Not	Not	Not	58	1.57	Not	Not	Not	Not	Not	Not	Not	Not	Yes	Not	Not	Always	Always		Always	Always	Always	Always	Not	26 Sep 20	23.5304	12a+	3	Not	Not	Not
521	2	Cusco	5B	Fem	18	2	Not	Not	Not	Not	Not	Not	55	1.5	Not	Not	Yes	Not	Not	Not	Not	Not	Not	Not	Not	Frequently	Always	Never	Never	Never	Always	Always	Not	20 Sep 20	24.4444	12a+	5	Not	Yes	Not
816	1	Periphery of Cusco	4443	Fem	58	1	Not	Not	Yes	Not	Not	Not	60	1.6	Not	Not	Not	Not	Not	Not	Not	Not	Not	Not	Not	Always	Always	Never	Always	Never	Always	Always	Not	26 Sep 20	23.4375	12a+	3	Not	Yes	Yes
312	4	Cusco	45ER22	Masc	18	4	Not	Not	Not	Not	Not	Not	83	1.73	Not	Not	Not	Not	Yes	Not	Not	Not	Not	Not	Not		Always		Always		Always	Always	Not	20 Sep 20	27.7323	7-11a	4	Not	Yes	Yes
372	2	Periphery of Cusco	25A17	Masc	27	2	Not	Not	Not	Not	Not	Not	60	1.64	Yes	Yes	Not	Not	Not	Not	Not	Not	Not	Not	Not	Always	Always	Never	Frequently	Never	Always	Sometimes	Not	26 Sep 20	22.3082	7-11a	3	Not	Not	Not
388	1	Cusco	89	Masc	62	1	Not	Not	Not	Not	Not	Not	64	1.64	Not	Not	Not	Not	Not	Not	Not	Not	Yes	Not	Not	Always	Always	Never	Always	Never	Always	Always	Yes	27 Sep 20	23.7954	7-11a	4	Not	Not	Not
825	3	Cusco	45kg9	Fem	32	5	Not	Not	Not	Not	Not	Not	65	1.64	Not	Not	Not	Not	Not	Not	Not	Yes	Not	Not	Yes	Always	Frequently	Frequently	Sometimes	Never	Always	Always	Yes	27 Sep 20	24.1672	12a+	3	Not	Not	Yes
907	2	Quillabamba	16	Fem	28	3	Not	Not	Not	Not	Not	Not	60	1.57	Not	Not	Not	Not	Not	Not	Not	Not	Not	Not	Not	Always	Always	Never	Never	Never	Always	Always	Not	20 Sep 20	24.3418	7-11a	3	Not	Not	Not
198	2	Quillabamba	-	Masc	39	2	Not	Not	Not	Not	Not	Not	100	1.62	Not	Not	Not	Not	Not	Not	Not	Not	Not	Not	Not	Always	Always	Sometimes	Sometimes	Always	Always	Always	Yes	14 Sep 20	38.1039	7-11a	3	Not	Not	Not
135	1	Cusco	3132	Fem	33	2	Not	Not	Not	Not	Not	Not	62	1.6	Not	Not	Not	Not	Not	Not	Not	Not	Yes	Not	Not	Frequently	Always	Always		Never	Always	Always	Not	14 Sep 20	24.2188	12a+	4	Not	Not	Not
450	2	Quillabamba	8	Masc	30	3	Not	Not	Not	Not		Not	66	1.6	Not	Not	Not	Not	Not	Not	Not	Not	Not	Not	Not	Always	Always	Never	Never	Never	Always	Always	Yes	20 Sep 20	25.7812	7-11a	3	Not	Not	Not
96	1	Periphery of Cusco	22273	Fem	60	2	Yes	Not	Not	Not	Not	Not	80	1.56	Not	Not	Not	Not	Not	Not	Not	Not	Not	Not	Not	Frequently	Frequently	Never	Never	Never	Frequently	Frequently	Not	14 Sep 20	32.8731	12a+	3	Not	Yes	Not
47	1	Cusco	1183	Fem	42	2	Not	Not	Not	Not	Not	Not	75	1.56	Yes	Yes	Not	Not	Yes	Yes	Not	Not	Not	Not	Yes	Frequently	Always	Never	Always	Never	Always	Always	Yes	14 Sep 20	30.8185	12a+	5	Yes	Yes	Yes
482	1	Quillabamba	1031	Fem	34	3	Not	Not	Not	Not	Not	Not	60	1.6	Not	Not	Not	Not	Not	Not	Not	Not	Not	Not	Not	Always	Always	Never	Never	Never	Always	Always	Yes	19 Sep 20	23.4375	12a+	3	Not	Not	Not
283	3	Periphery of Cusco	1712	Fem	25	3	Not	Not	Not	Not	Not	Not	67	1.65	Not	Not	Not	Not	Not	Not	Not	Not	Not	Not	Not	Always	Always	Never	Sometimes	Never	Always	Always	Yes	19 Sep 20	24.6097	12a+	4	Not	Yes	Yes
303	1	Cusco	45ER22	Masc	43	2	Not	Not	Not	Not	Not	Not	75	1.7	Not	Yes	Not	Not	Not	Not	Not	Not	Not	Not	Not	Always	Always	Never	Never	Never	Always	Always	Not	20 Sep 20	25.9516	12a+	4	Not	Yes	Yes
508	2	Cusco	21kc05	Masc	83	3	Not	Not	Not	Not	Not	Not	80	1.69	Yes	Yes	Yes	Not	Not	Not	Not	Not	Yes	Yes	Yes	Always	Always	Frequently	Frequently	Sometimes	Always	Always	Not	20 Sep 20	28.0102	12a+	3	Yes	Not	Yes
114	3	Periphery of Cusco	3853	Fem	25	3	Not	Not	Not	Not	Not	Not	56	1.56	Not	Not	Yes	Not	Not	Not	Not	Not	Yes	Not	Not	Always	Always		Always		Always	Always	Not	14 Sep 20	23.0112	12a+	4	Not	Not	Yes
245	1	Periphery of Cusco	5552	Fem	28	2	Not	Not	Not	Not	Not	Not	52	1.5	Not	Not	Not	Not	Not	Not	Not	Not	Yes	Not	Yes	Always	Always	Never	Sometimes	Never	Always	Always	Not	19 Sep 20	23.1111	12a+	3	Yes	Not	Not
514	1	Cusco	514.1.10	Fem	55	4	Not	Not	Not	Not	Not	Not	66	1.5	Yes	Yes	Yes	Yes	Not	Not	Not	Not	Yes	Not	Yes			Sometimes			Sometimes		Yes	20 Sep 20	29.3333	12a+	4	Not	Yes	Not
914	2	Quillabamba	23	Fem	62	5	Yes	Not	Not	Not	Not	Yes	70	1.5	Not	Not	Not	Not	Not	Not	Not	Not	Not	Not	Not	Always	Always	Never	Never	Never	Always	Always	Not	20 Sep 20	31.1111	7-11a	5	Not	Not	Not
703	4	Cusco	45NE17	Fem	23	4	Not	Not	Not	Not	Not	Not	50	1.53	Not	Yes	Not	Not	Not	Not	Not	Not	Yes	Not	Not	Frequently	Frequently	Never	Sometimes	Never	Frequently	Frequently	Yes	27 Sep 20	21.3593	12a+	4	Not	Not	Not
602	1	Periphery of Cusco	53-DE-29	Masc	51	3	Not	Not	Not	Not	Not	Not	75	1.62	Not	Not	Not	Not	Not	Not	Not	Not	Not	Not	Not	Always	Always	Sometimes	Sometimes	Sometimes	Always	Always	Yes	27 Sep 20	28.578	12a+	5	Yes	Yes	Yes
81	1	Periphery of Cusco	453B	Masc	60	3	Not	Not	Not	Not	Not	Not	80	1.62	Not	Not	Not	Not	Not	Not	Not	Not	Not	Not	Not	Always	Always	Sometimes	Sometimes	Never	Always	Always	Not	14 Sep 20	30.4832	7-11a	3	Not	Not	Not
48	2	Cusco	2023	Fem	21	3	Not	Not	Not	Not	Not	Not	47	1.52	Not	Not	Not	Not	Not	Not	Not	Not	Not	Not	Not	Frequently	Always	Never	Sometimes	Never	Always	Frequently	Not	14 Sep 20	20.3428	12a+	3	Not	Not	Not
400	3	Periphery of Cusco	50ME03	Masc	53	3	Not	Not	Not	Not	Not	Not	76	1.7	Not	Not	Not	Not	Not	Not	Not	Not	Yes	Not	Not	Frequently	Frequently	Never	Sometimes	Never	Frequently	Frequently	Yes	27 Sep 20	26.2976	12a+	5	Not	Yes	Yes
1003-421	2	Periphery of Cusco	1742	Fem	23	2	Not	Not	Not	Not	Not	Not	70	1.66	Not	Not	Not	Not	Not	Not	Not	Not	Not	Not	Not	Always	Always	Never	Never	Never	Frequently	Frequently	Yes	19 Sep 20	25.4028	7-11a	4	Not	Not	Not
531	7	Cusco	45ANT08	Masc	53	7	Not	Not	Not	Not	Not	Not	68	1.69	Not	Not	Not	Not	Not	Not	Not	Not	Not	Not	Not	Always	Always	Never	Sometimes	Never	Always	Always	Yes	20 Sep 20	23.8087	12a+	4	Not	Yes	Yes
60	2	Periphery of Cusco	22.1	Fem	36	2	Not	Not	Not	Not	Not	Not	60	1.55	Yes	Yes	Yes	Not	Yes	Not	Yes	Not	Yes	Not	Not	Always	Always		Sometimes		Always	Always	Yes	14 Sep 20	24.974	12a+	3	Not	Not	Not
333	1	Periphery of Cusco	2506	Fem	45	1	Not	Not	Not	Not	Not	Not	63	1.5	Yes	Yes	Not	Not	Not	Not	Not	Yes	Not	Yes	Not	Sometimes	Frequently	Never	Sometimes	Never	Frequently	Frequently	Yes	25 Sep 20	28	7-11a	4	Not	Not	Not
402	2	Periphery of Cusco	-	Masc	58	3	Not	Not	Not	Not	Not	Not	85	1.72	Not	Not	Not	Not	Not	Not	Not	Not	Not	Not	Not	Frequently	Frequently	Never	Always	Never	Frequently	Frequently	Not	27 Sep 20	28.7318	12a+	5	Not	Yes	Yes
274	3	Periphery of Cusco	77044	Fem	56	3	Not	Not	Not	Not	Not	Not	58	1.55	Not	Not	Not	Not	Not	Not	Not	Not	Yes	Yes	Not		Sometimes		Sometimes	Always			Not	19 Sep 20	24.1415	7-11a	3	Not	Not	Not
45	2	Cusco	1143C	Fem	62	2	Not	Not	Not	Not	Not	Not	52	1.57	Not	Not	Not	Not	Not	Not	Not	Not	Not	Not	Not	Frequently	Always		Always	Never	Always	Always	Yes	14 Sep 20	21.0962	12a+	3	Not	Not	Not
203	3	Quillabamba	Q203	Masc	25	4	Not	Not	Not	Not	Not	Not	77	1.68	Not	Not	Not	Not	Not	Not	Not	Not	Not	Not	Not	Always	Always	Never	Never	Never	Always	Always	Not	14 Sep 20	27.2817	12a+	4	Not	Not	Not
124	1	Periphery of Cusco	9654	Fem	38	2	Not	Not	Not	Not	Not	Not	57	1.63	Not	Yes	Not	Not	Not	Not	Not	Not	Not	Not	Not	Always	Always	Frequently	Frequently	Frequently	Frequently	Always	Not	14 Sep 20	21.4536	12a+	4	Not	Yes	Yes
941	1	Quillabamba	51	Fem	64	5	Not	Not	Not	Not	Not	Not	81	1.52	Not	Not	Not	Not	Not	Not	Not	Not	Not	Not	Not	Always	Always	Never	Never	Never	Always	Always	Not	20 Sep 20	35.0589	7-11a	5	Not	Not	Not
556	3	Cusco	556.1.10	Masc	24	3	Not	Not	Not	Not	Not	Not	70	1.75	Not	Not	Not	Not	Not	Not	Not	Not	Not	Not	Not	Always		Never		Never	Always	Always	Not	20 Sep 20	22.8571	12a+	3	Not	Not	Not
920	4	Quillabamba	29	Masc	63	6	Yes	Not	Not	Not	Not	Not	86	1.66	Not	Not	Not	Not	Not	Not	Not	Not	Not	Not	Not	Always	Always	Never	Never	Never	Always	Always	Not	20 Sep 20	31.2092	12a+	5	Not	Not	Not
55	2	Periphery of Cusco	4463B	Fem	51	4	Not	Not	Yes	Not	Not	Not	95	1.57	Not	Yes	Yes	Not	Not	Not	Not	Not	Not	Not	Not	Always	Always	Always	Always	Never	Always	Always	Not	14 Sep 20	38.5411	12a+	5	Not	Yes	Yes
472	1	Quillabamba	1022	Masc	63	5	Yes	Not	Not	Not		Not	84	1.69	Not	Not	Not	Not	Not	Not	Not	Not	Not	Not	Not	Always	Always	Never	Never	Never	Always	Always	Not	19 Sep 20	29.4107	12a+	4	Not	Not	Not
505	1	Cusco	21roc03	Fem	37	2	Not	Not	Not	Not	Not	Not	70	1.45	Not	Not	Not	Not	Not	Not	Not	Not	Not	Not	Not	Always	Always	Never	Never	Never	Always	Always	Not	20 Sep 20	33.2937	<7a	4	Not	Not	Not
807	1	Periphery of Cusco	4463-B	Fem	47	1	Not	Not	Not	Not	Not	Not	58	1.59	Not	Not	Not	Not	Not	Not	Not	Not	Not	Not	Not	Always	Always	Never	Always	Never	Always	Always	Yes	26 Sep 20	22.9421	12a+	3	Yes	Yes	Yes
1003-421	1	Periphery of Cusco	1742	Fem	43	2	Not	Not	Not	Not	Not	Not	86	1.5	Not	Not	Not	Not	Not	Not	Not	Not	Yes	Not	Not	Frequently	Always	Never	Frequently	Never	Frequently	Frequently	Yes	19 Sep 20	38.2222	7-11a	4	Not	Not	Not
151	2	Cusco	89M	Masc	43	3	Not	Not	Not	Not	Not	Not	72	1.62	Not	Not	Not	Not	Not	Not	Not	Not	Not	Not	Not	Always	Always	Never	Always	Never	Always	Always	Not	14 Sep 20	27.4348	<7a	4	Not	Not	Not
461	2	Quillabamba	1011	Masc	29	2	Not	Not	Not	Not	Not	Not			Not	Not	Not	Not	Not	Not	Not	Not	Not	Not	Not	Always	Always	Never	Never	Never	Always	Always	Yes	19 Sep 20		12a+	5	Not	Not	Not
213	1	Periphery of Cusco	213-N-1.10	Masc	19	2	Not	Not	Not	Not	Not	Not	78	1.65	Not	Not	Not	Not	Not	Not	Not	Not	Not	Not	Not		Always	Always	Sometimes		Always	Always	Not	18 Sep 20	28.6501	7-11a	3	Not	Yes	Yes
928	1	Quillabamba	37	Masc	74	2	Yes	Not	Not	Not	Not	Not			Not	Not	Not	Not	Not	Not	Not	Not	Not	Not	Not	Always	Always	Never	Never	Never	Always	Always	Not	20 Sep 20		7-11a	4	Not	Not	Not
906	2	Quillabamba	15	Fem	34	2	Not	Not	Not	Not		Not	100	1.64	Not	Not	Not	Not	Not	Not	Not	Not	Not	Not	Not	Always	Always	Never	Never	Never	Always	Always	Not	20 Sep 20	37.1803	12a+	4	Not	Yes	Not
106	3	Periphery of Cusco	3851	Fem	34	3	Not	Not	Not	Not	Not	Not	75	1.58	Not	Not	Not	Not	Not	Not	Not	Not	Not	Not	Not	Always	Always	Never	Always	Never	Always	Always	Not	14 Sep 20	30.0433	12a+	3	Not	Not	Not
619	1	Periphery of Cusco	25A30	Fem	39	1	Not	Not	Not	Not	Not	Not	72	1.5	Not	Yes	Yes	Not	Not	Not	Yes	Not	Not	Not	Not	Frequently	Always	Never	Always	Sometimes	Always	Always	Not	26 Sep 20	32	<7a	5	Not	Not	Not
941	4	Quillabamba	51	Fem	47	5	Not	Not	Not	Not	Not	Not	80	1.5	Not	Not	Not	Not	Not	Not	Not	Not	Not	Not	Not	Always	Always	Never	Never	Never	Always	Always	Not	20 Sep 20	35.5556	<7a	5	Not	Not	Not
720	3	Periphery of Cusco	45me09	Fem	21	3	Not	Not	Not	Not	Not	Not	65	1.68	Not	Not	Not	Not	Not	Not	Not	Not	Not	Not	Not	Frequently	Frequently	Never	Sometimes	Never	Frequently	Frequently	Yes	27 Sep 20	23.03	12a+	4	Not	Not	Not
472	4	Quillabamba	1022	Masc	29	5	Not	Not	Not	Not	Not	Not	82	1.69	Not	Not	Not	Not	Not	Not	Not	Not	Not	Not	Not	Always	Always	Never	Never	Never	Always	Always	Not	19 Sep 20	28.7105	12a+	4	Not	Not	Not
270	3	Periphery of Cusco	62031	Masc	20	3	Not	Not	Not	Not	Not	Not	60	1.7	Not	Not	Not	Not	Not	Not	Not	Not	Not	Not	Not	Always	Always	Never	Always	Never	Always	Always	Yes	19 Sep 20	20.7613	12a+	5	Not	Yes	Yes
134	2	Cusco	3133	Masc	52	2	Not	Not	Not	Not	Not	Not	96	1.81	Not	Not	Not	Not	Not	Not	Not	Not	Not	Not	Not	Always	Always	Sometimes	Frequently	Never	Always	Always	Not	14 Sep 20	29.3031	12a+	4	Not	Not	Not
824	3	Cusco	45kg08	Fem	24	3	Not	Not	Not	Not	Not	Not	48	1.48	Not	Yes	Yes	Yes	Not	Not	Not	Not	Yes	Not	Yes	Always	Always	Sometimes	Frequently	Always	Always	Always	Yes	27 Sep 20	21.9138	7-11a	5	Yes	Yes	Yes
362	1	Cusco	452B21	Fem	42	2	Not	Not	Not	Not	Not	Not	62	1.5	Not	Not	Not	Not	Yes	Not	Not	Not	Yes	Not	Not	Always	Always	Frequently	Frequently	Sometimes	Always	Always	Not	26 Sep 20	27.5556	12a+	5	Not	Not	Not
259	3	Periphery of Cusco	1721	Fem	78	4	Yes	Not	Not	Not	Not	Not	74	1.5	Not	Not	Not	Not	Not	Not	Not	Not	Not	Not	Not	Always	Always	Always	Sometimes	Never	Always	Always	Not	19 Sep 20	32.8889	<7a	4	Not	Not	Not
200	5	Quillabamba	Q200	Masc	21	5	Not	Not	Not	Not	Not	Not	75	1.72	Not	Not	Not	Not	Not	Not	Not	Not	Not	Not	Not	Always	Always	Sometimes	Never	Always	Always	Always	Not	14 Sep 20	25.3515	12a+	5	Not	Not	Not
468	3	Quillabamba	1018	Masc	54	4	Not	Not	Not	Not	Not	Not	70	1.68	Not	Not	Not	Not	Not	Not	Not	Not	Not	Not	Not	Always	Always	Never	Never	Never	Always	Always	Not	19 Sep 20	24.8016	7-11a	4	Not	Yes	Not
54	1	Periphery of Cusco	4463A	Masc	40	2	Not	Not	Not	Not	Not	Not	60	1.58	Not	Not	Not	Not	Not	Not	Not	Not	Not	Not	Not	Always	Always	Never	Never	Never	Always	Always	Not	14 Sep 20	24.0346	7-11a	4	Not	Not	Not
709	1	Periphery of Cusco	45ME03	Fem	53	4	Not	Not	Not	Not	Not	Not	78	1.55	Not	Not	Yes	Not	Not	Not	Not	Not	Not	Not	Not	Frequently	Frequently	Never	Frequently	Sometimes	Frequently	Always	Not	27 Sep 20	32.4662	12a+	4	Not	Not	Not
536	3	Cusco	45ER1	Fem	20	4	Not	Not	Not	Not	Not	Not	53	1.53	Not	Not	Not	Not	Not	Not	Not	Not	Not	Not	Not	Always	Always	Never	Never	Never	Always	Always	Not	20 Sep 20	22.6409	12a+	5	Not	Not	Not
531	4	Cusco	45ANT08	Masc	49	7	Not	Not	Not	Not	Not	Not	45	1.5	Not	Not	Not	Not	Not	Not	Not	Not	Not	Not	Not	Always	Always	Never	Sometimes	Never	Always	Always	Yes	20 Sep 20	20	7-11a	4	Not	Yes	Yes
111	3	Periphery of Cusco	3823	Fem	46	3	Not	Not	Not	Not	Not	Not	80	1.6	Yes	Yes	Yes	Not	Not	Yes	Not	Not	Yes	Yes	Yes	Always	Always		Always		Always	Always	Not	14 Sep 20	31.25	12a+	4	Not	Yes	Yes
601	2	Periphery of Cusco	50-DR-30	Fem	24	2	Not	Not	Not	Not	Not	Not	47	1.52	Not	Not	Not	Not	Not	Not	Not	Not	Not	Not	Not	Always	Always	Never	Frequently	Never	Always	Always	Not	27 Sep 20	20.3428	12a+	4	Not	Not	Not
132	1	Periphery of Cusco	4442	Fem	52	2	Not	Not	Not	Not	Not	Not	75	1.56	Not	Yes	Yes	Not	Yes	Yes	Not	Yes	Yes	Not	Not	Always	Always	Never	Never	Never	Always	Always	Not	14 Sep 20	30.8185	12a+	4	Not	Not	Yes
539	3	Cusco	45ER4	Fem	48	4	Yes	Not	Not	Not	Not	Not	76	1.51	Not	Not	Not	Not	Not	Not	Not	Not	Not	Not	Not	Always	Always	Never					Yes	20 Sep 20	33.3319	7-11a	5	Not	Not	Not
514	3	Cusco	514.1.10	Masc	25	4	Not	Not	Not	Not	Not	Not	75	1.61	Not	Not	Not	Not	Not	Not	Not	Not	Not	Not	Not	Always	Always	Sometimes	Always	Never	Always	Always	Not	20 Sep 20	28.9341	12a+	4	Not	Yes	Not
110	2	Periphery of Cusco	3812	Masc	18	5	Not	Not	Not	Not	Not	Not	80	1.75	Not	Yes	Not	Not	Yes	Not	Yes	Not	Not	Yes	Not	Frequently	Frequently	Never	Never	Never	Sometimes	Frequently	Not	14 Sep 20	26.1225	7-11a	5	Not	Not	Not
322	2	Cusco	89	Masc	29	2	Not	Not	Not	Not	Not	Not	60	1.7	Not	Not	Not	Not	Not	Not	Not	Not	Not	Not	Not	Always	Always	Never	Always	Always	Always	Sometimes	Not	20 Sep 20	20.7613	<7a	3	Not	Not	Not
611	2	Periphery of Cusco	25-A-22	Fem	18	3	Not	Not	Not	Not	Not	Not	70	1.52	Yes	Yes	Not	Not	Not	Not	Yes	Not	Not	Not	Not	Always	Always	Always	Sometimes	Sometimes	Always	Always	Not	26 Sep 20	30.2978	7-11a	3	Not	Not	Not
628	1	Cusco	212B30	Fem	35	2	Not	Not	Not	Not	Not	Not	62	1.5	Not	Not	Yes	Not	Not	Not	Not	Not	Yes	Not	Not	Always	Always	Frequently	Frequently	Frequently	Frequently	Frequently	Not	26 Sep 20	27.5556	12a+	3	Not	Yes	Yes
88	2	Periphery of Cusco	411F	Masc	30	2	Not	Not	Not	Not	Not	Not	70	1.6	Not	Not	Not	Not	Not	Not	Not	Not	Yes	Not	Not	Always	Always	Never	Sometimes	Frequently	Always	Always	Not	14 Sep 20	27.3438	12a+	3	Not	Not	Not
516	2	Cusco	_	Masc	55	3	Not	Not	Not	Not	Not	Not	65	1.68	Not	Not	Not	Not	Not	Not	Not	Not	Not	Not	Not	Always	Always		Sometimes	Never	Always	Always	Not	20 Sep 20	23.03	12a+	3	Not	Yes	Not
162	4	Quillabamba	6	Masc	24	4	Not	Not	Not	Not	Not	Not	63	1.64	Not	Yes	Not	Not	Not	Not	Not	Not	Yes	Not	Not	Always	Always	Sometimes	Never	Never	Always	Always	Not	14 Sep 20	23.4236	12a+	4	Not	Not	Not
468	4	Quillabamba	1018	Masc	54	4	Not	Not	Not	Not	Not	Not	52	1.52	Not	Yes	Not	Not	Not	Not	Not	Not	Not	Not	Not	Always	Always	Never	Never	Never	Always	Always	Yes	19 Sep 20	22.5069	12a+	4	Not	Yes	Not
825	1	Cusco	45kg9	Fem	39	5	Not	Not	Not	Not	Not	Not	57	1.56	Not	Not	Not	Not	Not	Not	Not	Not	Yes	Not	Not		Always		Always		Always	Always	Not	27 Sep 20	23.4221	12a+	3	Not	Not	Yes
250	1	Periphery of Cusco	62031	Fem	39	2	Not	Not	Not	Not	Not	Not	65	1.55	Yes	Yes	Yes	Not	Not	Yes	Yes	Yes	Yes	Not	Not	Always	Always	Frequently	Always	Sometimes	Always	Always	Not	19 Sep 20	27.0552	12a+	3	Not	Not	Not
446	1	Quillabamba	4	Masc	62	1	Yes	Not	Not	Not	Not	Not	78	1.65	Not	Not	Not	Not	Not	Not	Not	Not	Not	Not	Not	Always	Always	Never	Sometimes	Never	Always	Always	Not	20 Sep 20	28.6501	7-11a	5	Yes	Yes	Not
103	1	Cusco	3163	Fem	60	3	Not	Not	Not	Not	Not	Not	60	1.55	Not	Not	Not	Not	Not	Not	Not	Not	Not	Not	Not	Always	Always	Never	Always	Always	Always	Always	Not	14 Sep 20	24.974	12a+	3	Not	Yes	Yes
914	5	Quillabamba	23	Fem	37	5	Not	Not	Not	Not	Not	Not	80	1.65	Not	Not	Not	Not	Not	Not	Not	Not	Not	Not	Not	Always	Always	Never	Never	Never	Always	Always	Not	20 Sep 20	29.3848	12a+	5	Not	Not	Not
223	4	Periphery of Cusco	223-N-1.10	Masc		4	Not	Not	Not	Not	Not	Not	57	1.74	Not	Not	Not	Not	Not	Not	Not	Not	Not	Not	Not	Always	Always	Always	Never	Sometimes	Always	Always	Not	18 Sep 20	18.8268	7-11a	4	Not	Yes	Yes
414	3	Periphery of Cusco	50KG02	Masc	28	4	Not	Not	Not	Not	Not	Not	84	1.7	Not	Yes	Not	Not	Not	Not	Not	Not	Not	Not	Not	Sometimes	Sometimes	Never	Sometimes	Never	Frequently	Sometimes	Not	27 Sep 20	29.0657	12a+	5	Not	Not	Not
317	3	Cusco	45ER19	Fem	57	3	Not	Not	Not	Not	Not	Not	70	1.65	Yes	Yes	Not	Not	Yes	Yes	Not	Not	Yes	Yes	Not	Always	Always	Always	Always	Never	Always	Always	Yes	20 Sep 20	25.7117	7-11a	3	Not	Yes	Yes
817	1	Cusco	25KG03	Fem	24	4	Not	Not	Not	Not	Not	Not	60	1.56	Not	Not	Yes	Not	Not	Not	Not	Not	Not	Not	Not	Always	Always		Always	Sometimes	Always	Always	Not	27 Sep 20	24.6548	12a+	5	Not	Yes	Yes
941	3	Quillabamba	51	Fem		5	Not	Not	Not	Not	Not	Not	61	1.5	Not	Not	Not	Not	Not	Not	Not	Not	Not	Not	Not	Always	Always	Never	Never	Never	Always	Always	Not	20 Sep 20	27.1111	12a+	5	Not	Not	Not
930	3	Quillabamba	39	Masc	40	3	Not	Not	Not	Not	Not	Not			Not	Not	Not	Not	Not	Not	Not	Not	Not	Not	Not	Always	Always	Never	Never	Never	Always	Always	Not	20 Sep 20		12a+	4	Not	Not	Not
820	3	Cusco	45kg04	Fem	53	3	Not	Not	Not	Not	Not	Not	65	1.5	Not	Not	Not	Not	Not	Not	Not	Not	Not	Not	Not	Always	Always	Sometimes	Sometimes	Never	Always	Always	Not	27 Sep 20	28.8889	7-11a	3	Not	Not	Yes
176	2	Quillabamba	11	Fem	40	3	Not	Not	Not	Not	Not	Not	62	1.5	Not	Not	Not	Not	Not	Not	Not	Not	Not	Not	Not	Frequently	Always	Frequently	Always	Never	Always	Always	Not	14 Sep 20	27.5556	12a+	4	Not	Not	Not
147	2	Cusco	89-I	Fem	45	2	Not	Not	Not	Not	Not	Not	60	1.55	Not	Not	Not	Not	Not	Not	Not	Not	Not	Not	Not	Always	Always	Never	Always	Sometimes	Always	Always	Not	14 Sep 20	24.974	<7a	4	Not	Not	Not
363	1	Cusco	452B22	Fem	28	1	Not	Not	Not	Not	Not	Not	62	1.52	Not	Not	Not	Not	Not	Not	Not	Not	Not	Not	Not	Always	Always	Never	Frequently	Never	Always	Always	Not	26 Sep 20	26.8352	12a+	3	Not	Not	Not
161	1	Quillabamba	5	Masc	62	1	Not	Not	Not	Not	Not	Not	90	1.7	Not	Not	Not	Not	Not	Not	Not	Not	Not	Not	Not	Always	Always	Never	Always	Never	Always	Always	Not	14 Sep 20	31.1419	12a+	3	Not	Not	Not
417	1	Periphery of Cusco	53KG01	Fem	32	1	Not	Not	Not	Not	Not	Not	57	1.7	Yes	Yes	Not	Not	Yes	Not	Not	Not	Yes	Not	Not	Always	Frequently	Never	Frequently	Never	Always	Frequently	Not	27 Sep 20	19.7232	12a+	4	Not	Not	Not
62	1	Periphery of Cusco	221	Masc	53	5	Not	Not	Not	Not	Not	Not	75	1.62	Not	Not	Not	Not	Not	Not	Not	Not	Not	Not	Not	Always	Always	Always	Always		Always	Always	Not	14 Sep 20	28.578	12a+	5	Yes	Not	Not
465	2	Quillabamba	1015	Fem	70	3	Not	Not	Not	Not	Not	Not	48	1.5	Not	Not	Not	Not	Not	Not	Not	Not	Yes	Not	Not	Sometimes	Sometimes	Sometimes	Sometimes		Never	Sometimes	Yes	19 Sep 20	21.3333	<7a	3	Not	Yes	Yes
728	2	Cusco	45DR20	Fem	41	2	Not	Not	Not	Not	Not	Not	60	1.55	Not	Not	Not	Not	Not	Yes	Not	Yes	Not	Not	Not	Always	Always	Never	Frequently	Never	Always	Always	Not	27 Sep 20	24.974	12a+	3	Not	Not	Not
136	2	Cusco	3116	Masc	21	3	Not	Not	Not	Not	Not	Not	60	1.7	Not	Not	Not	Not	Not	Not	Not	Not	Not	Not	Not	Always	Always	Never	Sometimes	Sometimes	Always	Always	Not	14 Sep 20	20.7613	12a+	4	Not	Not	Not
176	1	Quillabamba	11	Masc	24	3	Not	Not	Not	Not	Not	Not	52	1.74	Not	Not	Not	Not	Not	Not	Not	Not	Not	Not	Not	Always	Always	Sometimes	Always	Never	Always	Always	Not	14 Sep 20	17.1753	7-11a	4	Not	Not	Not
1001-419	2	Periphery of Cusco	1733	Masc	20	3	Not	Not	Not	Not	Not	Not	80	1.72	Not	Not	Not	Not	Not	Not	Not	Not	Not	Not	Not	Frequently	Always	Sometimes	Never	Never	Always	Always	Not	19 Sep 20	27.0417	12a+	4	Not	Yes	Yes
902	1	Quillabamba	11	Fem	40	2	Not	Not	Not	Not	Not	Not	75	1.67	Not	Not	Yes	Not	Not	Yes	Not	Not	Not	Not	Not	Always	Always	Never	Never	Never	Always	Always	Not	20 Sep 20	26.8923	12a+	3	Not	Not	Not
932	2	Quillabamba	41	Fem	56	4	Yes	Not	Not	Not	Not	Not			Not	Not	Not	Not	Not	Not	Not	Not	Not	Not	Not	Always	Always	Never	Never	Never	Always	Always	Not	20 Sep 20		12a+	4	Not	Not	Not
111	1	Periphery of Cusco	3823	Fem	79	3	Not	Not	Not	Not	Not	Not	55		Not	Not	Not	Not	Not	Not	Not	Not	Not	Yes	Not	Always	Frequently	Never	Frequently	Never	Always	Always	Not	14 Sep 20		7-11a	4	Not	Yes	Yes
172	3	Quillabamba	15	Fem	28	3	Not	Not	Not	Not	Not	Not	59	1.58	Not	Not	Not	Not	Not	Not	Not	Not	Not	Not	Yes	Frequently	Always	Never	Frequently	Never	Always	Always	Yes	14 Sep 20	23.634	7-11a	4	Not	Not	Not
194	2	Quillabamba	Q194	Fem	19	8	Not	Not	Not	Not	Not	Not	72	1.6	Yes	Yes	Not	Not	Not	Not	Not	Not	Yes	Yes	Not	Always		Never	Never	Never	Always	Always	Not	14 Sep 20	28.125	12a+	5	Not	Not	Not
516	3	Cusco	_	Fem	21	3	Not	Not	Not	Not	Not	Not	58	1.55	Not	Yes	Not	Not	Not	Not	Not	Not	Yes	Not	Not	Always	Always	Sometimes	Always	Sometimes	Always	Frequently	Not	20 Sep 20	24.1415	12a+	3	Not	Yes	Not
905	1	Quillabamba	14	Fem	46	5	Not	Not	Not	Not	Not	Not	63	1.5	Not	Not	Not	Not	Not	Not	Not	Not	Yes	Not	Not	Always	Always	Never	Never	Never	Always	Always	Not	20 Sep 20	28	12a+	5	Not	Not	Not
470	1	Quillabamba	1020	Fem	27	3	Not	Not	Not	Not	Not	Not	63	1.7	Not	Not	Not	Not	Not	Not	Not	Not	Not	Not	Not	Always	Always	Never	Never	Never	Always	Always	Not	19 Sep 20	21.7993	12a+	5	Not	Not	Not
55	3	Periphery of Cusco	4463B	Masc	24	4	Not	Not	Not	Not	Not	Not	80	1.77	Yes	Yes	Not	Not	Yes	Yes	Yes	Yes	Not	Yes	Not	Always	Always	Always	Always	Never	Always	Always	Not	14 Sep 20	25.5355	12a+	5	Not	Yes	Yes
743	2	Cusco	45JL14	Masc	18	2	Not	Not	Not	Not	Not	Not	65	1.65	Not	Not	Not	Not	Not	Not	Not	Not	Not	Not	Not	Frequently	Always	Never	Always	Never	Always	Sometimes	Not	27 Sep 20	23.8751	7-11a	3	Not	Not	Not
603	4	Periphery of Cusco	53-DR-28	Fem	42	4	Not	Not	Not	Not		Not	59	1.62	Not	Not	Not	Not	Not	Not	Not	Yes	Yes	Not	Not	Always	Always	Sometimes	Never	Never	Always	Always	Yes	27 Sep 20	22.4813	12a+	5	Yes	Yes	Yes
334	1	Periphery of Cusco	2504	Fem	37	1	Not	Not	Not	Not	Not	Not	75	1.5	Yes	Yes	Yes	Not	Yes	Not	Not	Not	Yes	Not	Yes	Always	Always	Never	Sometimes	Never	Always	Always	Yes	25 Sep 20	33.3333	7-11a	3	Not	Not	Yes
302	1	Cusco	45ER22	Masc	36	2	Not	Not	Not	Not	Not	Not	73	1.65	Not	Not	Yes	Not	Not	Not	Not	Not	Yes	Not	Not	Always	Always	Always			Always	Always	Not	20 Sep 20	26.8136	12a+	3	Not	Not	Not
317	2	Cusco	45ER19	Fem	23	3	Not	Not	Not	Not	Not	Not	63	1.65	Yes	Not	Not	Not	Not	Yes	Not	Not	Yes	Not	Not	Always	Always	Always		Never	Always	Always	Yes	20 Sep 20	23.1405	12a+	3	Not	Yes	Yes
127	1	Periphery of Cusco	6351	Fem	27	4	Not	Not	Not	Not	Not	Not	70	1.6	Not	Not	Not	Not	Not	Not	Not	Not	Not	Not	Not	Always	Always	Always		Sometimes	Frequently	Frequently	Yes	14 Sep 20	27.3438	12a+	4	Not	Yes	Yes
520	3	Cusco	_	Fem	18	4	Not	Not	Not	Not	Not	Not	58	1.55	Not	Not	Not	Not	Not	Yes	Not	Yes	Not	Not	Not	Frequently	Always	Sometimes	Sometimes	Never	Always	Frequently	Yes	20 Sep 20	24.1415	7-11a	5	Not	Not	Not
456	1	Quillabamba	1006	Fem	30	2	Not	Not	Not	Not	Not	Not	52	1.5	Not	Not	Not	Not	Not	Yes	Not	Not	Yes	Not	Not	Frequently	Always		Sometimes	Never	Always	Always	Not	19 Sep 20	23.1111	12a+	3	Not	Not	Yes
256	2	Periphery of Cusco	77064	Masc	23	5	Not	Not	Not	Not	Not	Not	80	1.6	Not	Not	Not	Not	Not	Not	Not	Not	Not	Not	Not	Frequently	Always	Sometimes	Always	Sometimes	Always	Always	Not	19 Sep 20	31.25	12a+	5	Not	Not	Not
56	2	Cusco	1142B	Masc	46	4	Not	Not	Not	Not	Not	Not	105	1.68	Not	Not	Not	Not	Not	Not	Not	Not	Not	Not	Not	Frequently	Always		Always	Sometimes	Always	Always	Yes	14 Sep 20	37.2024	12a+	5	Not	Yes	Yes
365	1	Cusco	452B24	Fem	33	2	Not	Not	Not	Not	Not	Not	54	1.53	Not	Not	Not	Not	Not	Not	Not	Not	Yes	Not	Not	Always	Always	Never	Frequently	Never	Always	Always	Yes	26 Sep 20	23.068	12a+	5	Yes	Not	Yes
109	3	Periphery of Cusco	3822	Masc	60	3	Not	Not	Not	Not	Not	Not		1.6	Not	Not	Not	Not	Not	Not	Not	Not	Not	Not	Not	Always	Frequently	Never	Sometimes	Never	Always	Always	Yes	14 Sep 20		12a+	4	Not	Yes	Yes
167	1	Quillabamba	20	Fem	48	1	Not	Not	Not	Not	Not	Not	65	1.48	Yes	Yes	Yes	Not	Not	Yes	Not	Not	Yes	Not	Not	Always	Always	Never	Never	Never	Always	Always	Yes	14 Sep 20	29.6749	7-11a	4	Not	Not	Not
369	1	Cusco	452B28	Masc	53	1	Not	Not	Not	Not	Not	Not	67	1.67	Not	Not	Not	Not	Not	Not	Not	Not	Not	Not	Not	Always	Always	Sometimes	Frequently	Sometimes	Always	Always	Yes	26 Sep 20	24.0238	7-11a	4	Not	Yes	Yes
217	1	Periphery of Cusco	-	Masc	26	1	Not	Not	Not	Not	Not	Not	85	1.7	Yes	Not	Not	Not	Yes	Yes	Not	Not	Not	Yes	Yes	Always		Always			Always	Always	Yes	18 Sep 20	29.4118	12a+	4	Not	Not	Not
209	3	Quillabamba	Q209	Fem	24	3	Not	Not	Not	Not	Not	Not	55	1.62	Not	Yes	Not	Not	Not	Not	Not	Yes	Not	Not	Not	Always	Always				Always	Always	Not	14 Sep 20	20.9572	12a+	3	Not	Yes	Yes
605	4	Periphery of Cusco	29 - JR - 02	Fem	29	4	Not	Not	Not	Not	Not	Not	65	1.6	Not	Not	Not	Not	Not	Not	Not	Not	Not	Not	Not	Always	Frequently	Sometimes	Frequently	Sometimes	Frequently	Always	Yes	27 Sep 20	25.3906	12a+	5	Not	Not	Not
724	1	Cusco	45DR24	Fem	42	1	Not	Not	Not	Not	Not	Not	42	1.4	Yes	Not	Yes	Not	Not	Not	Not	Not	Not	Yes	Not	Always	Always	Sometimes	Sometimes	Never	Always	Always	Yes	27 Sep 20	21.4286	7-11a	4	Not	Not	Not
907	1	Quillabamba	16	Fem	28	3	Not	Not	Not	Not	Not	Not	79	1.5	Not	Not	Not	Not	Not	Not	Not	Not	Not	Not	Not	Always	Always	Never	Never	Never	Always	Always	Not	20 Sep 20	35.1111	12a+	3	Not	Not	Not
101	2	Periphery of Cusco	22262	Fem	20	2	Not	Not	Not	Not	Not	Not	54	1.64	Not	Not	Not	Not	Not	Not	Not	Not	Not	Not	Not	Always	Always	Always	Never	Never	Always	Frequently	Not	14 Sep 20	20.0773	12a+	4	Not	Not	Not
184	1	Quillabamba	3	Fem	59	1	Not	Not	Not	Not	Not	Not	73	1.55	Not	Not	Not	Not	Not	Not	Yes	Not	Not	Not	Not	Always	Always	Frequently	Always	Frequently	Always	Always	Not	14 Sep 20	30.385	<7a	3	Not	Not	Not
824	2	Cusco	45kg08	Masc	54	3	Not	Not	Not	Not	Not	Not	65	1.58	Yes	Yes	Yes	Not	Yes	Not	Not	Yes	Yes	Not	Not	Always	Always	Never	Always	Never	Always	Always	Not	27 Sep 20	26.0375	12a+	5	Yes	Yes	Yes
215	1	Periphery of Cusco	215.1.10	Fem	52	2	Yes	Not	Not	Not	Not	Not	60	1.55	Not	Not	Not	Not	Not	Not	Not	Not	Not	Not	Not	Always	Always		Sometimes	Always	Always	Always	Not	18 Sep 20	24.974	7-11a	5	Not	Not	Not
526	2	Cusco	45ANT04	Fem	45	2	Not	Not	Not	Not	Not	Not	50	1.5	Not	Not	Not	Not	Not	Not	Not	Not	Yes	Not	Not	Always	Always	Never	Never	Never	Always	Frequently	Not	20 Sep 20	22.2222	12a+	5	Not	Not	Not
204	1	Quillabamba	-	Masc	64	2	Not	Yes	Not	Not	Not	Not	69	1.5	Not	Not	Not	Not	Not	Not	Not	Not	Not	Not	Not	Always	Always	Never	Never	Never	Always	Always	Yes	14 Sep 20	30.6667	12a+	3	Not	Not	Yes
67	1	Periphery of Cusco	414A	Masc	27	3	Not	Not	Not	Not	Not	Not	87	1.54	Not	Not	Not	Not	Not	Not	Not	Not	Not	Not	Not	Always	Always	Never	Always	Never	Always	Always	Not	14 Sep 20	36.6841	12a+	3	Not	Yes	Not
148	3	Cusco	89J	Masc		3	Not	Not	Not	Not	Not	Not	56	1.59	Not	Not	Not	Not	Not	Not	Not	Yes	Yes	Not	Not	Always	Always	Never	Frequently	Never	Always	Always	Yes	14 Sep 20	22.151	7-11a	4	Not	Not	Not
456	2	Quillabamba	1006	Masc	37	2	Not	Not	Not	Not	Not	Not	94	1.7	Not	Yes	Yes	Not	Not	Not	Yes	Yes	Not	Not	Not	Always	Always	Never	Never	Never	Always	Always	Not	19 Sep 20	32.526	12a+	3	Not	Not	Yes
121	1	Periphery of Cusco	4423	Fem	44	3	Not	Not	Not	Not	Not	Not	52	1.54	Not	Not	Not	Not	Not	Not	Not	Not	Not	Not	Not	Always	Always	Sometimes	Always	Never	Always	Always	Not	14 Sep 20	21.9261	12a+	5	Not	Not	Not
532	1	Cusco	45ANT07	Fem	25	2	Not	Not	Not	Not	Not	Not	62	1.6	Not	Not	Not	Not	Not	Not	Not	Not	Not	Not	Not	Always	Always	Never	Sometimes	Never	Always	Always	Not	20 Sep 20	24.2188	12a+	3	Not	Not	Not
81	2	Periphery of Cusco	453B	Fem	58	3	Not	Not	Not	Not	Not	Not	85	1.6	Not	Not	Yes	Not	Yes	Yes	Yes	Not	Yes	Not	Not	Always	Always	Never	Frequently	Never	Always	Always	Not	14 Sep 20	33.2031	7-11a	3	Not	Not	Not
194	8	Quillabamba	Q194	Fem	38	8	Not	Not	Not	Not	Not	Not	58	1.6	Not	Not	Not	Not	Not	Not	Not	Not	Not	Not	Not	Always	Always	Sometimes	Sometimes	Never	Always	Always	Not	14 Sep 20	22.6562	12a+	5	Not	Not	Not
279	1	Periphery of Cusco	6253	Masc	60	3	Not	Not	Not	Not	Not	Not	72	1.65	Not	Not	Yes	Not	Not	Not	Not	Not	Not	Not	Yes	Always	Always	Never	Frequently	Frequently	Always	Always	Yes	19 Sep 20	26.4463	7-11a	4	Yes	Yes	Yes
463	2	Quillabamba	1013	Masc	32	2	Yes	Not	Not	Not	Not	Not			Not	Not	Yes	Not	Not	Not	Not	Not	Not	Not	Not	Always	Always	Never	Never	Never	Always	Always	Not	19 Sep 20		12a+	3	Not	Yes	Not
75	2	Periphery of Cusco	442B	Masc	18	2	Not	Not	Not	Not	Not	Not	75	1.69	Yes	Yes	Yes	Not	Yes	Not	Not	Not	Yes	Yes		Always	Always	Never	Frequently	Never	Always	Always	Yes	14 Sep 20	26.2596	12a+	3	Not	Yes	Yes
614	2	Periphery of Cusco	24A25	Fem	44	3	Not	Not	Not	Not	Not	Not	71	1.56	Yes	Yes	Not	Not	Not	Not	Not	Not	Yes	Not	Not	Frequently	Always	Sometimes	Sometimes	Sometimes	Frequently	Always	Not	26 Sep 20	29.1749	7-11a	5	Not	Not	Yes
312	3	Cusco	45ER22	Masc	50	4	Not	Not	Not	Not	Not	Not	66	1.7	Not	Not	Not	Not	Not	Not	Not	Not	Not	Not	Not	Always	Always	Sometimes	Sometimes	Never	Always	Always	Not	20 Sep 20	22.8374	7-11a	4	Not	Yes	Yes
824	1	Cusco	45kg08	Fem	42	3	Not	Not	Yes	Not	Not	Not	74	1.55	Not	Not	Not	Not	Not	Not	Not	Not	Yes	Not	Not	Always	Always	Never	Always	Never	Always	Always	Not	27 Sep 20	30.8012	12a+	5	Yes	Yes	Yes
173	1	Quillabamba	14	Fem	40	1	Not	Not	Not	Not	Not	Not	60	1.58	Not	Not	Not	Not	Not	Not	Not	Not	Not	Not	Not	Always	Always	Never	Always	Never	Always	Always	Not	14 Sep 20	24.0346	7-11a	5	Yes	Not	Not
81	3	Periphery of Cusco	453B	Fem	44	3	Not	Not	Not	Not	Not	Not	58	1.6	Yes	Yes	Not	Not	Not	Not	Not	Not	Not	Not	Not	Always	Always	Never	Sometimes	Never	Always	Always	Not	14 Sep 20	22.6562	7-11a	3	Not	Not	Not
270	1	Periphery of Cusco	62031	Masc	58	3	Not	Not	Not	Not	Not	Not	78	1.7	Not	Yes	Yes	Not	Not	Not	Yes	Not	Not	Not	Not	Always	Always	Never	Frequently	Never	Always	Always	Yes	19 Sep 20	26.9896	12a+	5	Not	Yes	Yes
572	1	Periphery of Cusco	83033	Masc	56	4	Not	Yes	Not	Not	Not	Not	85	1.7	Not	Not	Yes	Not	Not	Yes	Not	Not	Yes	Yes	Not	Always	Always	Never	Always	Never	Always		Yes	20 Sep 20	29.4118	7-11a	4	Not	Not	Not
537	4	Cusco	45ER2	Masc	18	4	Not	Not	Not	Not	Not	Not	60	1.7	Not	Not	Not	Not	Not	Not	Not	Not	Not	Not	Not	Always	Always	Sometimes	Sometimes	Never	Always	Always	Not	20 Sep 20	20.7613	7-11a	5	Not	Not	Not
521	1	Cusco	5B	Fem	40	2	Not	Not	Not	Not	Not	Not	65	1.46	Not	Not	Yes	Not	Not	Not	Not	Not	Yes	Not	Not	Frequently	Always	Never	Always	Sometimes	Always	Always	Yes	20 Sep 20	30.4935	7-11a	5	Not	Yes	Not
531	6	Cusco	45ANT08	Masc	45	7	Not	Not	Not	Not	Not	Not	75	1.63	Not	Not	Not	Not	Not	Not	Not	Not	Not	Not	Not	Always	Always	Never	Sometimes	Never	Always	Always	Not	20 Sep 20	28.2284	12a+	4	Not	Yes	Yes
274	1	Periphery of Cusco	77044	Fem	24	3	Not	Not	Not	Not	Not	Not	53	1.61	Not	Yes	Yes	Not	Yes	Not	Not	Not	Yes	Yes	Not	Always	Always	Never	Sometimes	Never	Always	Frequently	Not	19 Sep 20	20.4467	12a+	3	Not	Not	Not
160	2	Quillabamba	4	Masc	42	2	Not	Not	Not	Not	Not	Not	85	1.68	Not	Not	Not	Not	Not	Not	Not	Not	Not	Not	Not	Always	Always	Frequently	Always	Never	Always	Always	Not	14 Sep 20	30.1162	12a+	3	Not	Not	Not
558	2	Cusco	558.1.10	Masc	21	3	Not	Not	Not	Not		Not	85	1.83	Yes	Not	Not	Not	Not	Not	Not	Not	Not	Not	Not	Always	Always	Never	Frequently	Never	Always	Always	Yes	20 Sep 20	25.3815	12a+	4	Not	Not	Not
548	2	Cusco	45ER10	Fem	45	3	Not	Not	Not	Not	Not	Not	62	1.98	Not	Yes	Not	Not	Yes	Not	Not	Not	Yes	Not	Not	Always	Always	Never	Sometimes	Never	Always	Always	Not	20 Sep 20	15.8147	12a+	5	Not	Not	Not
553	3	Cusco	45ER13	Fem	21	4	Not	Not	Not	Not	Not	Not	52	1.54	Yes	Yes	Yes	Not	Yes	Yes	Not	Not	Yes	Yes	Not	Frequently	Always	Never	Frequently	Sometimes	Always	Always	Yes	20 Sep 20	21.9261	12a+	3	Not	Not	Not
33	2	Cusco	1163	Fem	57	4	Not	Not	Not	Not	Not	Yes	54	1.52	Not	Yes	Not	Not	Not	Not	Not	Not	Yes	Not	Not	Always	Always	Sometimes	Always	Never	Always	Always	Not	14 Sep 20	23.3726	12a+	4	Yes	Yes	Yes
385	2	Periphery of Cusco	25A06	Masc	56	4	Not	Not	Not	Not	Not	Not	90	1.71	Not	Not	Not	Not	Not	Not	Not	Yes	Not	Not	Not	Frequently	Frequently	Frequently	Frequently	Frequently	Frequently	Frequently	Yes	26 Sep 20	30.7787		5	Not	Not	Not
736	1	Cusco	45JL09	Fem	42	2	Not	Not	Not	Not	Not	Not	68	1.58	Not	Not	Not	Not	Not	Yes	Not	Not	Yes	Not	Not	Always	Always	Frequently	Frequently	Never	Always	Always	Yes	27 Sep 20	27.2392	12a+	4	Not	Not	Not
905	3	Quillabamba	14	Masc	67	5	Not	Not	Not	Not	Not	Not	60	1.52	Yes	Not	Not	Not	Yes	Yes	Not	Not	Yes	Yes	Not	Always	Always	Never	Never	Never	Always	Always	Not	20 Sep 20	25.9695	12a+	5	Not	Not	Not
151	1	Cusco	89M	Fem	43	3	Not	Not	Not	Not	Not	Not	69	1.57	Not	Not	Not	Not	Yes	Yes	Not	Not	Not	Not	Not	Always	Always	Sometimes	Always	Sometimes	Always	Always	Not	14 Sep 20	27.993	<7a	4	Not	Not	Not
746	1	Cusco	45JL03	Masc	68	3	Not	Not	Not	Not	Not	Not	65	1.65	Not	Not	Not	Not	Not	Not	Not	Not	Not	Not	Not	Frequently	Frequently	Never	Sometimes	Never	Always	Always	Not	27 Sep 20	23.8751	7-11a	5	Not	Not	Not
194	5	Quillabamba	Q194	Fem	72	8	Yes	Yes	Not	Not	Not	Not	60	1.5	Not	Yes	Not	Not	Not	Not	Not	Not	Not	Not	Not	Always	Always	Never	Sometimes	Never	Never	Never	Not	14 Sep 20	26.6667	7-11a	5	Not	Not	Not
448	1	Quillabamba	6	Masc	68	1	Not	Not	Not	Not	Not	Not	52	1.62	Not	Not	Not	Not	Not	Not	Not	Not	Not	Not	Not	Always	Always	Frequently	Never	Never	Always	Always	Not	20 Sep 20	19.8141	<7a	5	Not	Not	Not
820	2	Cusco	45kg04	Masc	19	3	Not	Not	Not	Not	Not	Not	60	1.59	Not	Not	Not	Not	Not	Not	Not	Not	Not	Not	Not	Always	Always	Sometimes	Sometimes	Never	Always	Always	Not	27 Sep 20	23.7332	12a+	3	Not	Not	Yes
141	1	Cusco	89C	Masc	37	2	Not	Not	Not	Not	Not	Not			Yes	Yes	Yes	Yes	Yes	Yes	Not	Yes	Yes	Yes	Yes	Always	Always	Always	Frequently	Never	Frequently	Frequently	Yes	14 Sep 20		12a+	5	Not	Yes	Yes
707	3	Periphery of Cusco	45ME12	Fem	21	3	Not	Not	Not	Not	Not	Not	52	1.51	Yes	Yes	Not	Not	Yes	Not	Not	Not	Yes	Yes	Not	Sometimes	Sometimes	Never	Sometimes	Never	Frequently	Frequently	Not	27 Sep 20	22.806	12a+	3	Not	Not	Not
441	1	Periphery of Cusco	P441	Masc	47	2	Not	Not	Not	Not	Not	Not	89	1.76	Not	Yes	Not	Not	Not	Not	Not	Not	Yes	Not	Not	Always	Always	Always	Always	Always	Always	Always	Not	27 Sep 20	28.7319	12a+	4	Not	Not	Not
282	3	Periphery of Cusco	1711	Fem	23	3	Not	Not	Not	Not	Not	Not	50	1.55	Not	Not	Not	Not	Not	Not	Not	Not	Not	Not	Not	Always	Always	Always	Frequently	Never	Always	Always	Yes	19 Sep 20	20.8117	12a+	5	Not	Not	Not
25	3	Periphery of Cusco	49711	Masc	50	3	Not	Not	Not	Not	Not	Not	100	1.7	Not	Not	Not	Not	Not	Not	Not	Not	Not	Not	Not	Always	Always		Sometimes		Always	Always	Yes	14 Sep 20	34.6021	7-11a	5	Not	Yes	Yes
620	1	Periphery of Cusco	25A31	Masc	35	3	Yes	Not	Not	Not	Not	Not	95	1.7	Yes	Yes	Yes	Not	Yes	Yes	Yes	Yes	Yes	Yes	Yes	Always	Always	Never	Sometimes	Sometimes	Always	Always	Yes	26 Sep 20	32.872	12a+	4	Not	Not	Not
140	1	Cusco	89B	Fem	64	3	Not	Not	Not	Not	Not	Not	51	1.5	Not	Yes	Yes	Yes	Yes	Not	Not	Not	Yes	Yes	Yes	Always	Always	Never	Frequently	Sometimes	Always	Always	Yes	14 Sep 20	22.6667	<7a	5	Not	Not
472	5	Quillabamba	1022	Fem	24	5	Not	Not	Not	Not		Not	58	1.53	Yes	Not	Not	Not	Not	Not	Not	Not	Not	Not	Not	Frequently	Frequently	Never	Never	Never	Frequently	Frequently	Not	19 Sep 20	24.7768	12a+	4	Not	Not	Not
106	1	Periphery of Cusco	3851	Fem	66	3	Not	Not	Not	Not	Not	Not	90	1.55	Not	Not	Not	Not	Not	Not	Not	Not	Not	Not	Not	Always	Always	Never	Always	Never	Always	Always	Not	14 Sep 20	37.461	7-11a	3	Not	Not	Not
303	2	Cusco	45ER22	Fem	47	2	Not	Not	Not	Not	Not	Not	54	1.5	Not	Not	Not	Not	Not	Not	Not	Not	Not	Not	Not	Always	Always	Never	Sometimes	Never	Always	Always	Not	20 Sep 20	24	12a+	4	Not	Yes	Yes
288	1	Periphery of Cusco	66022	Fem	64	2	Not	Not	Not	Not	Not	Not	52	1.55	Yes	Not	Yes	Not	Not	Yes	Yes	Yes	Yes	Not	Not	Always	Always	Never	Frequently	Never	Frequently	Always	Yes	19 Sep 20	21.6441	12a+	5	Not	Yes	Yes
932	1	Quillabamba	41	Fem	26	4	Not	Not	Not	Not	Not	Not			Not	Yes	Not	Not	Not	Not	Not	Not	Yes	Not	Not	Always	Always	Never	Never	Never	Always	Always	Not	20 Sep 20		12a+	4	Not	Not	Not
910	3	Quillabamba	19	Fem	18	5	Not	Not	Not	Not	Not	Not	65	1.6	Not	Not	Not	Not	Not	Not	Not	Not	Yes	Not	Not	Always	Always	Never	Never	Never	Always	Always	Not	20 Sep 20	25.3906	12a+	5	Not	Not	Yes
47	2	Cusco	1183	Masc	48	2	Not	Not	Not	Not	Not	Not	79	1.7	Yes	Yes	Yes	Not	Not	Yes	Not	Not	Not	Yes	Yes	Always	Always	Never	Never	Never	Always	Always	Yes	14 Sep 20	27.3356	12a+	5	Yes	Yes	Yes
245	2	Periphery of Cusco	5552	Fem	27	2	Not	Not	Not	Not	Not	Yes	50	1.53	Not	Not	Not	Not	Not	Not	Not	Not	Yes	Not	Not	Always	Always	Never	Never	Never	Always	Always	Not	19 Sep 20	21.3593	12a+	3	Yes	Not	Not
805	2	Periphery of Cusco	4424	Fem	55	2	Not	Not	Not	Not	Not	Not	64	1.58	Yes	Yes	Yes	Not	Not	Yes	Not	Not	Not	Yes	Not	Always	Always	Never	Frequently	Never	Always	Always	Not	26 Sep 20	25.6369	12a+	5	Not	Not	Not
313	2	Cusco	45DR01	Fem	39	2	Not	Not	Not	Not	Not	Not	68	1.54	Not	Not	Not	Not	Not	Not	Not	Not	Yes	Not	Not	Always	Always	Always	Always	Sometimes	Always	Always	Not	20 Sep 20	28.6726	12a+	3	Not	Not	Yes
442	3	Quillabamba	9	Fem	25	7	Not	Not	Not	Not	Not	Not	59	1.51	Not	Not	Not	Not	Not	Not	Not	Not	Not	Not	Not	Always	Always						Not	20 Sep 20	25.8761	7-11a	3	Not	Not	Not
85	2	Periphery of Cusco	411C	Masc	23	2	Not	Not	Not	Not	Not	Not	60	1.65	Not	Not	Not	Not	Not	Not	Not	Not	Not	Not	Not	Always	Always	Never	Sometimes	Never	Always	Always	Not	14 Sep 20	22.0386	7-11a	4	Not	Not	Not
1009-427	4	Cusco	45ER15	Fem	19	4	Not	Not	Not	Not	Not	Not	58	1.61	Not	Not	Not	Not	Not	Not	Not	Not	Not	Not	Not	Always	Always	Sometimes	Sometimes	Never	Always	Always	Not	20 Sep 20	22.3757	12a+	5	Not	Not	Not
919	1	Quillabamba	28	Masc	35	3	Not	Not	Not	Not	Not	Not	85	1.5	Not	Not	Not	Not	Not	Not	Not	Not	Not	Not	Not	Always	Always	Always	Frequently	Frequently	Always	Always	Not	20 Sep 20	37.7778	7-11a	4	Not	Not	Not
16	1	Periphery of Cusco	35	Fem	44	1	Not	Not	Not	Not	Not	Not	65	1.5	Not	Not	Yes	Not	Not	Not	Not	Not	Yes	Not	Not	Always	Always	Sometimes	Frequently	Never	Always	Always	Not	14 Sep 20	28.8889	12a+	5	Not	Not	Not
261	2	Periphery of Cusco	62112	Masc	30	3	Not	Not	Not	Not	Not	Not	85	1.83	Not	Not	Not	Not	Not	Not	Not	Not	Not	Not	Not	Always	Always	Never	Sometimes	Sometimes	Always	Always	Not	19 Sep 20	25.3815	12a+	5	Not	Not	Not
451	1	Quillabamba	1001	Fem	60	2	Not	Yes	Not	Not	Not	Not	68	1.5	Not	Not	Not	Not	Not	Yes	Not	Not	Yes	Not	Not	Always	Always	Never	Always	Never	Always	Always	Not	19 Sep 20	30.2222	7-11a	3	Not	Yes	Yes
109	1	Periphery of Cusco	3822	Fem	62	3	Not	Not	Not	Not	Not	Not	60	1.6	Yes	Not	Not	Not	Yes	Not	Not	Not	Not	Not	Not	Always	Always	Always	Never	Frequently	Always	Always	Yes	14 Sep 20	23.4375	12a+	4	Not	Yes	Yes
197	2	Quillabamba	Q197	Masc	33	4	Not	Not	Not	Not	Not	Not	105	1.78	Not	Not	Not	Not	Not	Not	Not	Not	Not	Not	Not	Always	Always	Never	Always	Never	Always	Always	Yes	14 Sep 20	33.1398	12a+	4	Not	Not	Not
802	1	Periphery of Cusco	44021	Masc	89	3	Yes	Not	Not	Not	Not	Not	55	1.5	Not	Not	Not	Not	Not	Not	Not	Not	Not	Not	Not		Always				Always	Always	Not	26 Sep 20	24.4444	<7a	3	Not	Not	Not
912	1	Quillabamba	21	Masc	55	4	Not	Not	Not	Not	Not	Not	98	1.64	Not	Not	Not	Not	Not	Not	Not	Not	Not	Not	Not	Always	Always	Never	Never	Never	Always	Always	Not	20 Sep 20	36.4367	12a+	5	Not	Not	Not
122	2	Periphery of Cusco	4441	Fem	58	4	Not	Not	Not	Not	Not	Not	60	1.45	Not	Not	Not	Not	Not	Yes	Not	Not	Yes	Not	Not	Always	Always	Never	Never	Never	Always	Always	Yes	14 Sep 20	28.5374	7-11a	5	Not	Yes	Yes
389	2	Cusco	89	Fem	52	2	Not	Not	Not	Not	Not	Not	56	1.53	Yes	Yes	Yes	Not	Yes	Yes	Not	Not	Yes	Yes	Yes	Always	Always	Never	Frequently	Sometimes	Always	Always	Yes	27 Sep 20	23.9224	7-11a	4	Not	Yes	Not
317	1	Cusco	45ER19	Fem	41	3	Not	Not	Not	Not	Not	Not	80	1.66	Yes	Not	Yes	Not	Not	Not	Not	Yes	Yes	Not	Not	Always	Always	Never	Frequently	Never	Always	Always	Yes	20 Sep 20	29.0318	7-11a	3	Not	Yes	Yes
239	2	Periphery of Cusco	5572	Masc	34	2	Not	Not	Not	Not	Not	Not	62	1	Not	Not	Not	Not	Not	Not	Not	Not	Not	Not	Not	Frequently	Always	Never	Always		Always	Always	Not	19 Sep 20	62	7-11a	3	Not	Not	Not
278	1	Periphery of Cusco	1713B	Masc	69	4	Not	Not	Not	Not	Not	Not	84	1.6	Not	Not	Yes	Not	Not	Not	Not	Not	Not	Not	Not	Always	Always	Never	Never	Never	Always	Always	Not	19 Sep 20	32.8125	7-11a	5	Not	Not	Not
604	1	Periphery of Cusco	29-JR-01	Fem	59	2	Not	Not	Not	Not	Not	Not	67	1.55	Not	Not	Yes	Not	Not	Not	Not	Yes	Not	Yes	Not	Always	Always	Never	Sometimes	Never	Always	Always	Not	27 Sep 20	27.8876	12a+	4	Not	Not	Not
8	2	Periphery of Cusco	22243	Masc	33	3	Not	Not	Not	Not	Not	Not	70	1.77	Not	Not	Not	Not	Not	Not	Not	Not	Not	Not	Not	Frequently	Always	Never	Never	Never	Frequently	Frequently	Not	14 Sep 20	22.3435	7-11a	4	Not	Not	Not
520	4	Cusco	_	Masc	32	4	Not	Not	Not	Not	Not	Not	85	1.9	Not	Not	Not	Not	Yes	Yes	Not	Not	Not	Not	Not	Frequently	Always	Never	Always	Never	Always	Frequently	Yes	20 Sep 20	23.5457	12a+	5	Not	Not	Not
720	2	Periphery of Cusco	45me09	Fem		3	Not	Not	Not	Not	Not	Not	82	1.6	Not	Yes	Not	Not	Not	Not	Not	Not	Not	Yes	Not	Frequently	Frequently	Never	Sometimes	Never	Frequently	Frequently	Not	27 Sep 20	32.0312	12a+	4	Not	Not	Not
53	1	Periphery of Cusco	4453	Masc	55	4	Not	Not	Not	Not	Not	Not	89	1.7	Not	Not	Not	Not	Not	Yes	Not	Not	Not	Not	Not	Always	Always	Sometimes	Sometimes	Always	Always	Always	Yes	14 Sep 20	30.7959	12a+	4	Not	Yes	Yes
72	1	Periphery of Cusco	412	Masc	56	3	Not	Not	Not	Not	Not	Not	72	1.69	Yes	Yes	Not	Not	Not	Not	Not	Not	Not	Not	Not	Always	Always	Never	Frequently	Frequently	Always	Always	Yes	14 Sep 20	25.2092	12a+	3	Yes	Yes	Yes
386	1	Periphery of Cusco	25A07	Fem	24	1	Not	Not	Not	Not	Not	Not	67	1.52	Not	Not	Not	Not	Not	Not	Not	Not	Not	Not	Not	Always	Always	Never	Frequently	Never	Always	Always	Yes	26 Sep 20	28.9993	<7a	3	Not	Not	Not
223	2	Periphery of Cusco	223-N-1.10	Fem	45	4	Not	Not	Not	Not	Not	Not	56	1.6	Not	Not	Yes	Not	Not	Yes	Not	Not	Not	Not	Not	Always	Always	Always	Always	Sometimes	Always	Always	Yes	18 Sep 20	21.875	12a+	4	Not	Yes	Yes
253	2	Periphery of Cusco	62153	Masc	41	2	Not	Not	Not	Not	Not	Not	75	1.78	Yes	Yes	Yes	Yes	Yes	Yes	Yes	Yes	Yes	Yes	Yes	Always	Always	Never	Frequently	Never	Always	Always	Yes	19 Sep 20	23.6713	12a+	4	Not	Not	Not
338	1	Periphery of Cusco	2511	Fem	38	1	Not	Not	Not	Not	Not	Not	52	1.45	Not	Not	Not	Not	Not	Not	Not	Not	Yes	Not	Not	Sometimes	Always	Never	Always	Frequently	Always	Always	Not	25 Sep 20	24.7325	7-11a	5	Not	Not	Not
72	2	Periphery of Cusco	412	Fem	53	3	Not	Not	Not	Not	Not	Not	70	1.53	Not	Not	Not	Not	Not	Not	Not	Not	Not	Not	Not		Always		Sometimes	Frequently	Always	Always	Yes	14 Sep 20	29.903	12a+	3	Yes	Yes	Yes
73	3	Periphery of Cusco	443	Fem	30	4	Not	Not	Not	Not	Not	Not	69	1.54	Yes	Not	Not	Not	Not	Not	Not	Not	Not	Not	Not	Always	Always		Always	Always	Always	Always	Yes	14 Sep 20	29.0943	12a+	5	Not	Not	Not
157	2	Cusco	89S	Masc	23	2	Not	Not	Not	Not	Not	Not	87	1.69	Not	Not	Not	Not	Not	Not	Not	Not	Not	Not	Not	Always	Frequently		Sometimes	Sometimes	Frequently	Frequently	Yes	14 Sep 20	30.4611	7-11a	5	Not	Yes	Not
181	2	Quillabamba	6	Fem	29	2	Not	Not	Not	Not	Not	Not	54	1.7	Not	Not	Not	Not	Not	Not	Not	Not	Not	Not	Not	Always	Always	Never	Never	Never	Always	Always	Yes	14 Sep 20	18.6851	12a+	4	Not	Yes	Yes
625	2	Periphery of Cusco	25A36	Fem	57	2	Not	Not	Not	Not	Not	Not	73	1.57	Not	Yes	Not	Not	Not	Not	Yes	Not	Yes	Not	Yes	Sometimes	Sometimes	Never	Sometimes	Never	Frequently	Frequently	Yes	26 Sep 20	29.6158	7-11a	3	Not	Not	Not
547	3	Cusco	45ER10	Fem	43	3	Not	Not	Not	Not	Not	Not	57	1.5	Not	Yes	Not	Not	Not	Not	Not	Not	Not	Not	Not	Always	Always	Sometimes	Sometimes	Never	Always	Always	Not	20 Sep 20	25.3333	7-11a	3	Not	Not	Yes
193	2	Quillabamba	193.1.10	Fem		2	Not	Not	Not	Not	Not	Not	70	1.55	Not	Not	Not	Not	Not	Not	Not	Not	Not	Not	Not	Always	Always	Frequently	Frequently	Frequently	Always	Always	Not	14 Sep 20	29.1363	12a+	3	Not	Not	Not
413	3	Periphery of Cusco	53KG4	Masc	22	3	Not	Not	Not	Not	Not	Not	60		Yes	Not	Yes	Not	Not	Not	Not	Yes	Yes	Not	Yes	Always	Always	Never	Sometimes	Never	Frequently	Frequently	Yes	27 Sep 20		12a+	3	Not	Not	Not
940	3	Quillabamba	50	Fem	71	4	Not	Not	Not	Not	Not	Not	61	1.55	Not	Not	Yes	Not	Not	Not	Not	Not	Yes	Not	Not	Always	Always	Never	Never	Never	Always	Always	Not	20 Sep 20	25.3902	<7a	4	Not	Not	Not
223	3	Periphery of Cusco	223-N-1.10	Fem	20	4	Not	Not	Not	Not	Not	Not	60	1.59	Not	Not	Not	Not	Not	Not	Not	Not	Not	Not	Not	Always	Always	Always	Never	Sometimes	Always	Always	Yes	18 Sep 20	23.7332	12a+	4	Not	Yes	Yes
553	2	Cusco	45ER13	Masc	60	4	Not	Not	Not	Not	Not	Not	78	1.6	Yes	Yes	Yes	Not	Not	Not	Not	Not	Not	Yes	Not	Always	Always			Always		Frequently	Yes	20 Sep 20	30.4688		3	Not	Not	Not
1009-427	3	Cusco	45ER15	Fem	28	4	Not	Not	Not	Not	Not	Not	62	1.6	Not	Not	Not	Not	Not	Not	Not	Not	Not	Not	Not	Always	Always	Sometimes	Sometimes	Never	Always	Always	Not	20 Sep 20	24.2188	12a+	5	Not	Not	Not
324	2	Cusco	-	Fem	57	2	Not	Yes	Not	Not	Not	Not	63	1.45	Yes	Not	Not	Not	Not	Not	Not	Yes	Not	Yes	Not	Always	Always	Frequently	Sometimes	Never	Frequently	Always	Yes	20 Sep 20	29.9643	<7a	3	Not	Not	Yes
712	1	Periphery of Cusco	45M302	Masc	44	2	Not	Not	Not	Not	Not	Not	105	1.8	Yes	Yes	Not	Yes	Yes	Yes	Not	Not	Yes	Not	Not	Frequently	Frequently	Never	Never	Never	Frequently	Frequently	Yes	27 Sep 20	32.4074	12a+	4	Not	Not	Not
461	1	Quillabamba	1011	Fem	34	2	Not	Not	Not	Not	Not	Not	56	1.56	Not	Not	Not	Not	Not	Not	Not	Not	Yes	Not	Not	Always	Always	Never	Never	Never	Always	Always	Yes	19 Sep 20	23.0112	7-11a	5	Not	Not	Not
505	2	Cusco	21roc03	Fem	27	2	Not	Not	Not	Not	Not	Not	65	1.45	Not	Not	Not	Not	Not	Not	Not	Not	Not	Not	Not	Always	Always	Never	Never	Never	Always	Frequently	Yes	20 Sep 20	30.9156	7-11a	4	Not	Not	Not
103	2	Cusco	3163	Masc	23	3	Not	Not	Not	Not	Not	Not	66	1.74	Yes	Not	Not	Not	Not	Not	Not	Yes	Yes	Not	Not	Frequently	Always	Frequently	Frequently	Never	Frequently	Always	Not	14 Sep 20	21.7994	12a+	3	Not	Yes	Yes
249	2	Periphery of Cusco	77023	Fem	73	4	Not	Not	Not	Not	Not	Yes	76	1.55	Not	Not	Not	Not	Not	Not	Not	Not	Not	Not	Not	Always	Frequently	Sometimes	Never	Never	Always		Not	19 Sep 20	31.6337	7-11a	4	Not	Not	Not
122	4	Periphery of Cusco	4441	Fem	23	4	Not	Not	Not	Not	Not	Not	45	1.46	Not	Not	Not	Not	Not	Not	Not	Not	Not	Not	Not	Always	Always	Never	Never	Sometimes	Always	Always	Yes	14 Sep 20	21.1109	7-11a	5	Not	Yes	Yes
734	3	Cusco	45JL06	Fem	60	4	Yes	Not	Not	Not	Not	Yes	52		Yes	Not	Not	Yes	Not	Not	Not	Yes	Not	Not	Not	Always	Always		Sometimes	Sometimes	Sometimes	Always	Not	27 Sep 20		<7a	5	Not	Not	Not
79	2	Periphery of Cusco	452	Masc	25	3	Not	Not	Not	Not	Not	Not	77	1.68	Not	Not	Not	Not	Not	Not	Not	Not	Not	Not	Not	Always	Always	Always	Always	Always	Always	Always	Not	14 Sep 20	27.2817	7-11a	3	Not	Not	Not
95	1	Periphery of Cusco	22252	Fem	48	1	Not	Not	Not	Not	Not	Not	55	1.5	Not	Yes	Not	Not	Not	Yes	Yes	Not	Yes	Not	Not	Frequently	Frequently	Never	Sometimes	Never	Sometimes	Frequently	Yes	14 Sep 20	24.4444	12a+	3	Yes	Not	Not
162	3	Quillabamba	6	Masc	24	4	Not	Not	Not	Not	Not	Not	80	1.72	Not	Not	Not	Not	Not	Not	Not	Yes	Not	Yes	Not	Always	Always	Frequently	Never	Never	Always	Always	Not	14 Sep 20	27.0417	12a+	4	Not	Not	Not
563	1	Periphery of Cusco	5322	Fem	42	1	Not	Not	Not	Not	Not	Not	68	1.5	Not	Not	Yes	Not	Not	Not	Not	Not	Yes	Not	Not	Frequently	Always	Sometimes	Never	Never	Frequently	Frequently	Not	20 Sep 20	30.2222	7-11a	4	Not	Not	Not
539	2	Cusco	45ER4	Masc	56	4	Not	Not	Not	Not	Not	Not	50	1.52	Not	Not	Not	Not	Not	Not	Not	Not	Not	Not	Not	Always	Always	Never	Sometimes	Always	Always	Always	Yes	20 Sep 20	21.6413	12a+	5	Not	Not	Not
248	2	Periphery of Cusco	5571	Masc	69	3	Not	Not	Not	Not	Not	Not	79	1.7	Yes	Not	Not	Not	Not	Not	Not	Not	Yes	Not	Not	Always	Always	Never	Sometimes	Never	Always	Frequently	Not	19 Sep 20	27.3356	12a+	4	Not	Yes	Yes
342	3	Periphery of Cusco	2509	Fem	27	3	Not	Not	Not	Not	Not	Not	58	1.5	Not	Not	Not	Not	Not	Not	Not	Not	Not	Not	Not	Always	Always	Never	Sometimes	Never	Frequently	Frequently	Yes	25 Sep 20	25.7778	7-11a	5	Not	Not	Not
912	2	Quillabamba	21	Fem	56	4	Not	Not	Not	Not	Not	Not	59	1.51	Not	Not	Not	Not	Not	Not	Not	Not	Not	Not	Not	Always	Always	Never	Never	Never	Always	Always	Not	20 Sep 20	25.8761	<7a	5	Not	Not	Not
277	1	Periphery of Cusco	66043	Fem	44	2	Yes	Not	Not	Not	Not	Not	57	1.5	Not	Yes	Not	Not	Not	Not	Not	Not	Yes	Not	Not	Always	Always	Never	Frequently	Never	Always	Always	Not	19 Sep 20	25.3333	<7a	5	Not	Not	Yes
194	6	Quillabamba	Q194	Masc	51	8	Not	Not	Not	Not	Not	Not	63	1.8	Not	Not	Yes	Not	Yes	Not	Not	Not	Not	Not	Not	Always	Always	Never	Frequently	Never	Always	Always	Not	14 Sep 20	19.4444	12a+	5	Not	Not	Not
611	3	Periphery of Cusco	25-A-22	Fem		3	Not	Not	Not	Not	Not	Not	52	1.6	Not	Not	Not	Not	Not	Not	Not	Not	Not	Not	Not	Always	Always	Always	Sometimes	Sometimes	Always	Always	Not	26 Sep 20	20.3125	12a+	3	Not	Not	Not
475	2	Quillabamba	1025	Fem	81	3	Yes	Not	Not	Yes	Not	Yes			Yes	Not	Not	Not	Not	Not	Not	Not	Not	Not	Not								Not	19 Sep 20		7-11a	5	Not	Yes	Yes
234	1	Periphery of Cusco	8352	Fem	50	2	Not	Not	Not	Not	Not	Not	62	1.59	Not	Not	Not	Not	Not	Not	Not	Not	Not	Not	Not	Always	Always	Frequently	Frequently	Never	Always	Always	Not	18 Sep 20	24.5243	12a+	3	Not	Not	Not
292	2	Cusco	21ant01	Masc	37	3	Not	Not	Not	Not	Not	Not	77	1.7	Not	Not	Not	Not	Not	Not	Not	Not	Yes	Not	Not	Frequently	Always	Never	Never	Never	Always	Always	Not	20 Sep 20	26.6436	12a+	3	Not	Yes	Yes
313	1	Cusco	45DR01	Fem	67	2	Not	Not	Not	Not	Not	Not	53	1.5	Not	Not	Not	Not	Not	Not	Not	Not	Not	Not	Not	Always	Always	Always	Always		Always	Always	Not	20 Sep 20	23.5556	12a+	3	Not	Not	Yes
561	1	Cusco	560.1.10	Fem	33	2	Not	Not	Not	Not	Not	Not	59	1.6	Not	Yes	Yes	Not	Not	Not	Not	Not	Yes	Not	Not	Always	Always	Never	Frequently	Never	Always	Always	Not	20 Sep 20	23.0469	<7a	4	Not	Yes
415	1	Periphery of Cusco	53KG5	Fem	39	2	Not	Not	Not	Not	Not	Not	72	1.6	Not	Not	Not	Not	Yes	Yes	Not	Not	Not	Yes	Yes	Frequently	Frequently	Frequently	Sometimes		Always	Frequently	Not	27 Sep 20	28.125	7-11a	3	Not	Not	Not
442	1	Quillabamba	9	Masc	28	7	Not	Not	Not	Not	Not	Not	65	1.7	Not	Not	Not	Not	Not	Not	Not	Not	Not	Not	Not	Always	Always	Never	Never	Never	Always	Always	Not	20 Sep 20	22.4914	7-11a	3	Not	Not	Not
548	3	Cusco	45ER10	Masc	19	3	Not	Not	Not	Not	Not	Not	83	1.72	Not	Not	Not	Not	Not	Not	Not	Not	Not	Not	Not	Always	Always	Never	Sometimes	Sometimes	Always	Always	Not	20 Sep 20	28.0557	7-11a	5	Not	Not	Not
362	2	Cusco	452B21	Masc	69	2	Not	Not	Not	Not	Not	Not	89	1.69	Not	Not	Not	Not	Not	Not	Not	Not	Not	Not	Not	Always	Always	Sometimes	Frequently	Never	Always	Always	Not	26 Sep 20	31.1614	7-11a	5	Not	Not	Not
209	2	Quillabamba	Q209	Fem	41	3	Not	Not	Not	Not	Not	Not	65	1.68	Not	Not	Not	Not	Not	Not	Not	Not	Not	Not	Not	Always	Always				Always	Always	Not	14 Sep 20	23.03	12a+	3	Not	Yes	Yes
618	1	Periphery of Cusco	23A29	Fem	41	1	Not	Not	Not	Not	Not	Not	50	1.48	Not	Not	Not	Not	Not	Not	Not	Not	Not	Not	Not	Always	Always	Frequently		Always	Always	Always	Not	26 Sep 20	22.8269	7-11a	5	Not	Not	Not
125	1	Periphery of Cusco	9644	Fem	42	1	Not	Not	Not	Not	Not	Not	92	1.64	Not	Not	Not	Not	Not	Not	Not	Not	Not	Not	Not	Always	Always		Frequently	Never	Always	Always	Not	14 Sep 20	34.2058	7-11a	4	Not	Not	Yes
709	3	Periphery of Cusco	45ME03	Masc	19	4	Not	Not	Not	Not	Not	Not	54	1.57	Not	Not	Not	Not	Yes	Not	Not	Not	Not	Not	Not	Sometimes	Frequently	Sometimes	Sometimes	Never	Frequently	Frequently	Yes	27 Sep 20	21.9076	7-11a	4	Not	Not	Not
741	2	Cusco	45JL13	Fem	25	2	Not	Not	Not	Not	Not	Not	49	1.55	Not	Not	Yes	Not	Not	Not	Not	Not	Yes	Not	Not	Always	Always	Frequently	Sometimes	Never	Always	Always	Yes	27 Sep 20	20.3954	12a+	3	Not	Not	Not
296	2	Periphery of Cusco	226	Fem	30	3	Not	Not	Not	Not	Not	Not	50	1.57	Not	Not	Not	Not	Not	Not	Not	Not	Not	Not	Not	Always	Always		Always		Always	Always	Not	20 Sep 20	20.2848	12a+	3	Not	Not	Not
457	1	Quillabamba	1007	Fem	45	1	Not	Not	Not	Not	Not	Not	83	1.68	Not	Not	Not	Not	Not	Not	Not	Not	Not	Not	Not	Always	Always	Never	Never	Never	Always	Always	Yes	19 Sep 20	29.4076	12a+	4	Not	Not	Not
414	1	Periphery of Cusco	50KG02	Fem	49	4	Not	Not	Not	Not	Not	Not	74	1.76	Not	Not	Yes	Not	Not	Yes	Not	Not	Yes	Yes	Not	Always	Always	Never	Sometimes	Never	Always	Frequently	Not	27 Sep 20	23.8895	12a+	5	Not	Not	Not
155	1	Cusco	89Q	Masc	19	2	Not	Not	Not	Not	Not	Not	64	1.68	Not	Not	Not	Not	Not	Not	Not	Not	Yes	Not	Not	Always	Always	Never	Always	Always	Always	Always	Not	14 Sep 20	22.6757	<7a	5	Not	Not	Not
447	2	Quillabamba	5	Fem	37	5	Not	Not	Not	Not	Not	Not	68	1.55	Not	Not	Not	Not	Not	Not	Not	Not	Yes	Not	Not	Always	Always	Never	Never	Never	Always	Always	Not	20 Sep 20	28.3039	12a+	3	Not	Not	Not
284	1	Periphery of Cusco	62031	Fem	40	2	Not	Not	Not	Not	Not	Not	58	1.6	Not	Not	Not	Not	Not	Not	Not	Not	Not	Not	Not	Always	Always	Always	Always	Always	Always		Not	19 Sep 20	22.6562	12a+	3	Not	Not	Not
136	1	Cusco	3116	Fem	56	3	Not	Not	Not	Not	Not	Not	40	1.5	Not	Not	Not	Not	Not	Not	Not	Not	Yes	Not	Not	Always	Always	Sometimes	Frequently	Never	Always	Always	Not	14 Sep 20	17.7778	12a+	4	Not	Not	Not
127	3	Periphery of Cusco	6351	Fem	50	4	Not	Not	Not	Not	Not	Not	70	1.5	Not	Not	Not	Not	Not	Not	Not	Not	Not	Not	Not	Always	Always	Always	Always	Sometimes	Always	Always	Not	14 Sep 20	31.1111	12a+	4	Not	Yes	Yes
516	1	Cusco	_	Fem	54	3	Not	Not	Not	Not	Not	Not	81	1.65	Not	Not	Not	Not	Not	Not	Not	Not	Not	Not	Not	Always	Always	Never	Frequently	Sometimes	Always	Frequently	Not	20 Sep 20	29.7521	7-11a	3	Not	Yes	Not
571	2	Periphery of Cusco	83081	Masc	21	2	Not	Not	Not	Not	Not	Not	64	1.73	Not	Not	Not	Not	Not	Not	Not	Not	Yes	Not	Not	Always	Always	Sometimes	Frequently	Sometimes	Always	Always	Not	20 Sep 20	21.3839		4	Not	Not	Not
548	1	Cusco	45ER10	Masc	47	3	Not	Not	Not	Not	Not	Not	72	1.63	Not	Not	Not	Not	Not	Not	Not	Not	Not	Not	Not	Always	Always	Sometimes	Sometimes	Sometimes	Always	Always	Not	20 Sep 20	27.0993	7-11a	5	Not	Not	Not
52	2	Cusco	3041	Fem	40	3	Yes	Not	Not	Not	Not	Not	62	1.6	Not	Not	Not	Not	Not	Not	Not	Not	Not	Not	Not								Not	14 Sep 20	24.2188	12a+	4	Yes	Not	Yes
539	4	Cusco	45ER4	Masc	25	4	Not	Not	Not	Not	Not	Not	50	1.57	Not	Not	Not	Not	Not	Not	Not	Not	Not	Not	Not	Always	Always	Never	Sometimes	Sometimes	Always	Always	Yes	20 Sep 20	20.2848	12a+	5	Not	Not	Not
701	1	Periphery of Cusco	45ME1B	Fem	32	2	Not	Not	Not	Not	Not	Not	70	1.66	Not	Not	Not	Not	Not	Not	Not	Not	Yes	Not	Not	Frequently	Always	Never	Frequently	Never	Always	Frequently	Not	27 Sep 20	25.4028	12a+	4	Not	Not	Not
73	2	Periphery of Cusco	443	Masc	29	4	Not	Not	Not	Not	Not	Not	85	1.68	Not	Not	Not	Not	Yes	Not	Yes	Not	Not	Not	Not	Always	Always	Never	Frequently	Never	Always	Always	Yes	14 Sep 20	30.1162	12a+	5	Not	Not	Not
221	1	Periphery of Cusco	-	Fem	50	1	Yes	Not	Not	Not	Not	Not			Not	Not	Not	Not	Not	Not	Not	Not	Not	Not	Not	Always		Always		Always	Always	Always	Not	18 Sep 20		12a+	4	Not	Not	Yes
219	2	Periphery of Cusco	-	Masc	26	2	Not	Not	Not	Not	Not	Not	72	1.75	Not	Not	Not	Not	Not	Not	Not	Not	Not	Not	Not	Frequently		Sometimes	Never	Sometimes	Frequently	Always	Not	18 Sep 20	23.5102	12a+	3	Not	Not	Not
150	1	Cusco	89L	Fem	38	1	Not	Not	Not	Not	Not	Not	50	1.5	Not	Not	Not	Not	Not	Not	Not	Not	Not	Not	Not	Always	Always	Sometimes	Always	Sometimes	Always	Always	Not	14 Sep 20	22.2222	<7a	3	Not	Not	Not
819	2	Cusco	45kg02	Masc	56	3	Not	Not	Not	Not	Not	Not	67	1.66	Not	Not	Not	Not	Not	Not	Not	Not	Not	Not	Not	Always	Always	Never	Sometimes	Never	Always	Always	Yes	27 Sep 20	24.3141	7-11a	4	Not	Not	Not
296	3	Periphery of Cusco	226	Fem	22	3	Not	Not	Not	Not	Not	Yes	58	1.57	Not	Yes	Not	Not	Yes	Not	Yes	Not	Yes	Not	Not	Always	Always		Always		Always	Always	Not	20 Sep 20	23.5304	12a+	3	Not	Not	Not
331	1	Periphery of Cusco	2501B	Fem	48	3	Not	Not	Not	Not	Not	Not	80	1.55	Not	Not	Not	Not	Not	Not	Not	Not	Not	Not	Not	Frequently	Always	Never	Sometimes	Never	Frequently	Frequently	Yes	25 Sep 20	33.2987	<7a	5	Not	Yes	Yes
259	4	Periphery of Cusco	1721	Fem	88	4	Not	Not	Not	Not	Not	Not	55	1.6	Not	Not	Not	Not	Not	Not	Not	Not	Not	Not	Not	Always	Always	Always	Sometimes	Never	Always	Always	Not	19 Sep 20	21.4844	<7a	4	Not	Not	Not
42	1	Cusco	1131	Fem	23	1	Not	Not	Not	Not	Not	Not	50	1.5	Not	Not	Not	Not	Not	Not	Not	Not	Not	Not	Not	Always	Always	Never	Always	Never	Always	Always	Not	14 Sep 20	22.2222	12a+	5	Not	Not	Yes
907	3	Quillabamba	16	Fem	39	3	Not	Not	Not	Not	Not	Not	63	1.5	Yes	Yes	Yes	Not	Yes	Yes	Yes	Not	Yes	Not	Not	Always	Always	Never	Never	Never	Never		Not	20 Sep 20	28	12a+	3	Not	Not	Not
536	4	Cusco	45ER1	Fem	42	4	Not	Not	Not	Not	Not	Not	63	1.5	Not	Yes	Not	Not	Not	Not	Not	Yes	Not	Not	Not	Always	Always	Never	Sometimes	Never	Always	Always	Not	20 Sep 20	28	7-11a	5	Not	Not	Not
811	1	Periphery of Cusco	4473	Fem	50	2	Not	Not	Not	Not	Not	Not	62	1.58	Not	Yes	Not	Not	Not	Not	Not	Not	Yes	Not	Not	Always	Always	Always	Always	Sometimes	Always	Always	Not	26 Sep 20	24.8358	12a+	4	Not	Not	Not
204	2	Quillabamba	-	Fem	57	2	Not	Not	Not	Not	Not	Not	75	1.62	Not	Not	Not	Not	Not	Not	Not	Not	Not	Not	Not	Always	Always	Never	Never	Never	Always	Always	Yes	14 Sep 20	28.578	7-11a	3	Not	Not	Yes
232	1	Periphery of Cusco	8383	Masc	30	2	Not	Not	Not	Not	Not	Not	68	1.6	Not	Yes	Not	Not	Yes	Yes	Not	Yes	Yes	Yes	Not	Frequently	Always	Never	Never	Sometimes	Always	Frequently	Not	18 Sep 20	26.5625	<7a	4	Not	Not	Not
249	4	Periphery of Cusco	77023	Masc	38	4	Not	Not	Not	Not	Not	Not	77	1.73	Not	Yes	Not	Not	Not	Not	Not	Not	Not	Not	Not	Always	Always	Never	Sometimes	Never	Always	Always	Not	19 Sep 20	25.7276	12a+	4	Not	Not	Not
553	1	Cusco	45ER13	Fem	57	4	Not	Not	Not	Not	Not	Not	70	1.59	Not	Not	Yes	Not	Not	Not	Not	Not	Not	Not	Not	Always	Always	Never	Always		Frequently	Frequently	Yes	20 Sep 20	27.6888	7-11a	3	Not	Not	Not
1501	1	Quillabamba	Q2001	Fem	40	1	Not	Not	Not	Yes	Not	Not	51	1.5	Yes	Yes	Not	Not	Yes	Yes	Yes	Not	Yes	Not	Not	Frequently	Always	Sometimes	Sometimes	Frequently	Frequently	Always	Not	14 Sep 20	22.6667	7-11a	3	Not	Not	Not
187	1	Quillabamba	2B	Fem	34	2	Not	Not	Not	Not	Not	Not	55	1.53	Not	Not	Not	Not	Not	Not	Not	Not	Not	Not	Not	Always	Always	Frequently	Sometimes	Never	Always	Always	Not	14 Sep 20	23.4952	12a+	3	Not	Not	Not
291	1	Cusco	2113	Fem	49	2	Not	Not	Not	Not	Not	Not	62	1.5	Not	Not	Not	Not	Not	Not	Not	Not	Not	Not	Not	Always	Always	Never	Never	Sometimes	Always	Frequently	Not	20 Sep 20	27.5556	12a+	5	Not	Not	Not
114	1	Periphery of Cusco	3853	Masc	33	3	Not	Not	Not	Not	Not	Not	80	1.7	Not	Not	Yes	Not	Not	Not	Not	Not	Not	Not	Not	Frequently	Always		Sometimes		Always	Always	Not	14 Sep 20	27.6817	12a+	4	Not	Not	Yes
940	4	Quillabamba	50	Masc	51	4	Not	Not	Not	Not	Not	Not	62	1.58	Not	Not	Not	Not	Not	Not	Not	Not	Not	Not	Not	Frequently	Frequently	Frequently	Never	Never	Frequently	Always	Not	20 Sep 20	24.8358	12a+	4	Not	Not	Not
250	2	Periphery of Cusco	62031	Masc	47	2	Not	Not	Not	Not	Not	Not	87	1.65	Not	Yes	Yes	Not	Not	Yes	Yes	Not	Yes	Yes	Not	Always	Always	Always	Always	Never	Always	Always	Not	19 Sep 20	31.9559	12a+	3	Not	Not	Not
735	2	Cusco	45JL08	Masc	50	2	Not	Not	Not	Not	Not	Not	67	1.7	Not	Not	Yes	Not	Not	Not	Yes	Not	Yes	Not	Not	Always	Always	Never	Sometimes	Never	Sometimes	Always	Yes	27 Sep 20	23.1834	12a+	3	Not	Yes	Yes
148	2	Cusco	89J	Fem	46	3	Not	Not	Not	Not	Not	Yes			Not	Not	Not	Not	Not	Not	Not	Not	Not	Not	Not	Always	Always	Never	Always	Never	Always	Always	Yes	14 Sep 20		<7a	4	Not	Not	Not
515	1	Cusco	5	Fem	68	3	Not	Not	Not	Not	Not	Not	86	1.8	Not	Not	Not	Not	Not	Not	Not	Not	Yes	Not	Not	Always	Always	Never	Never	Never	Always	Always	Not	20 Sep 20	26.5432	12a+	3	Not	Yes	Not
450	3	Quillabamba	8	Fem		3	Not	Not	Not	Not	Not	Not	70	1.49	Not	Not	Not	Not	Not	Not	Not	Not	Not	Not	Not	Always	Always	Never	Never	Never	Always	Always	Not	19 Sep 20	31.5301	<7a	3	Not	Not	Not
483	1	Quillabamba	1032	Fem	31	1	Not	Not	Not	Not	Not	Not	82	1.62	Not	Not	Yes	Not	Not	Not	Not	Not	Yes	Not	Not	Always	Always	Never	Never	Never	Always	Always	Yes	19 Sep 20	31.2452	7-11a	3	Not	Not	Not
502	3	Cusco	21.1.A	Fem	23	3	Not	Not	Not	Not	Not	Not	55	1.53	Not	Not	Not	Not	Not	Not	Not	Not	Yes	Not	Not	Frequently	Always	Always	Always	Always	Always	Frequently	Not	20 Sep 20	23.4952	12a+	3	Not	Yes	Not
736	2	Cusco	45JL09	Masc	50	2	Not	Not	Not	Not	Not	Not	88	1.63	Yes	Not	Not	Not	Not	Not	Not	Not	Not	Not	Not	Frequently	Frequently	Frequently	Frequently	Never	Frequently		Not	27 Sep 20	33.1213		4	Not	Not	Not
68	2	Periphery of Cusco	413	Masc	36	2	Not	Not	Not	Not	Not	Not	62	1.7	Not	Yes	Not	Not	Not	Not	Not	Not	Yes	Not	Not	Always	Always	Never	Never	Never	Always	Frequently	Not	14 Sep 20	21.4533	12a+	4	Not	Yes	Not
110	5	Periphery of Cusco	3812	Fem	20	5	Not	Not	Not	Not	Not	Not	54	1.6	Not	Not	Not	Not	Not	Not	Not	Yes	Not	Yes	Yes	Always	Always	Always	Sometimes	Never	Always	Always	Not	14 Sep 20	21.0938	12a+	5	Not	Not	Not
239	1	Periphery of Cusco	5572	Fem	42	2	Not	Not	Not	Not	Not	Not	63	1.63	Not	Not	Not	Not	Not	Not	Not	Not	Not	Not	Not	Frequently	Always	Never	Always	Sometimes	Always	Frequently	Not	19 Sep 20	23.7118	7-11a	3	Not	Not	Not
459	1	Quillabamba	1009	Fem	44	1	Not	Not	Not	Not	Not	Not	76	1.5	Not	Not	Not	Not	Not	Not	Not	Not	Not	Not	Not	Frequently	Frequently	Never	Never	Never	Always	Always	Not	19 Sep 20	33.7778	<7a	3	Not	Not	Not
194	3	Quillabamba	Q194	Masc	51	8	Not	Yes	Not	Not	Not	Not	78	1.72	Not	Not	Not	Not	Not	Not	Not	Not	Not	Not	Not	Always	Always	Never	Never	Never	Always	Always	Not	14 Sep 20	26.3656	7-11a	5	Not	Not	Not
381	1	Periphery of Cusco	25A03	Fem	25	1	Not	Not	Not	Not	Not	Not	50	1.54	Not	Not	Not	Not	Not	Not	Not	Not	Yes	Not	Not	Sometimes	Frequently	Never	Sometimes	Never	Frequently	Always	Not	26 Sep 20	21.0828	12a+	4	Not	Not	Not
479	2	Quillabamba	1028	Masc	44	2	Not	Not	Not	Not	Not	Not	72	1.6	Not	Not	Yes	Not	Not	Not	Not	Not	Not	Not	Not	Always	Always	Never	Never	Never	Always	Always	Not	19 Sep 20	28.125	12a+	3	Not	Not	Not
213	3	Periphery of Cusco	213-N-1.10	Masc		2	Not	Not	Not	Not		Not	74	1.59	Not	Yes	Yes	Not	Not	Not	Not	Not	Not	Not	Not	Always	Always				Always	Always	Not	18 Sep 20	29.271	7-11a	3	Not	Yes	Yes
335	1	Periphery of Cusco	2503	Masc	25	1	Not	Not	Not	Not	Not	Not	63	1.73	Yes	Yes	Yes	Not	Not	Yes	Yes	Yes	Yes	Yes	Not	Always	Always	Never	Sometimes	Never	Always	Always	Not	25 Sep 20	21.0498	12a+	4	Not	Not	Not
729	1	Cusco	45DR19	Fem	48	2	Not	Not	Not	Not	Not	Not	56	1.55	Not	Not	Not	Not	Yes	Not	Not	Not	Yes	Not	Not	Always	Always	Never	Frequently	Never	Always	Always	Not	27 Sep 20	23.309	12a+	4	Not	Yes	Not
1009-427	2	Cusco	45ER15	Fem	36	4	Not	Not	Not	Not	Not	Not	60	1.55	Not	Yes	Not	Not	Not	Not	Not	Not	Yes	Not	Not	Always	Always	Sometimes	Sometimes	Never	Always	Always	Not	20 Sep 20	24.974	7-11a	5	Not	Not	Not
112	2	Periphery of Cusco	3811	Masc	53	2	Not	Yes	Not	Not	Not	Not	86	1.7	Yes	Yes	Not	Not	Not	Not	Not	Not	Not	Not	Not	Always	Always	Sometimes	Always	Never	Frequently	Frequently	Not	14 Sep 20	29.7578	12a+	4	Not	Not	Not
275	1	Periphery of Cusco	77031	Masc	61	3	Not	Not	Not	Not	Not	Not	70	1.68	Not	Yes	Not	Not	Not	Not	Not	Not	Yes	Not	Not	Always	Always	Never	Sometimes	Never	Always	Always	Not	19 Sep 20	24.8016	12a+	5	Not	Not	Not
531	3	Cusco	45ANT08	Fem	51	7	Not	Not	Not	Not	Not	Not	60	1.59	Yes	Not	Not	Not	Not	Yes	Not	Not	Yes	Not	Not	Always	Always	Sometimes	Sometimes	Never	Always	Always	Yes	20 Sep 20	23.7332	7-11a	4	Not	Yes	Yes
472	3	Quillabamba	1022	Fem	29	5	Not	Not	Not	Not	Not	Not	52	1.52	Not	Yes	Not	Not	Not	Not	Not	Not	Not	Not	Not	Always	Always	Never	Never	Never	Always	Always	Not	19 Sep 20	22.5069	12a+	4	Not	Not	Not
156	1	Cusco	89R	Fem	70	2	Not	Not	Not	Not	Not	Not	52	1.6	Not	Not	Not	Not	Not	Not	Not	Not	Not	Not	Not	Always	Always	Sometimes	Always	Sometimes	Always	Always	Yes	14 Sep 20	20.3125	<7a	3	Not	Not	Not
275	3	Periphery of Cusco	77031	Fem	90	3	Yes	Yes	Not	Not	Not	Not	68	1.5	Yes	Not	Not	Not	Not	Not	Not	Not	Not	Not	Not								Not	19 Sep 20	30.2222	<7a	5	Not	Not	Not
531	1	Cusco	45ANT08	Fem	34	7	Not	Not	Not	Not	Not	Not	95	1.59	Not	Not	Not	Not	Not	Not	Not	Not	Not	Not	Not	Always	Always	Never	Sometimes	Never	Always	Always	Yes	20 Sep 20	37.5776	7-11a	4	Not	Yes	Yes
525	5	Cusco	45 ANT 05	Masc	36	5	Not	Not	Not	Not	Not	Not	57	1.6	Not	Not	Not	Not	Not	Not	Not	Not	Yes	Not	Not	Always	Frequently	Never	Always	Never	Always	Always	Yes	20 Sep 20	22.2656	12a+	5	Not	Not	Not
531	2	Cusco	45ANT08	Fem	76	7	Not	Not	Not	Not	Not	Not	50	1.45	Not	Not	Not	Not	Not	Yes	Not	Not	Yes	Yes	Not	Always	Always	Never	Never	Never	Always	Always	Yes	20 Sep 20	23.7812	<7a	4	Not	Yes	Yes
8	1	Periphery of Cusco	22243	Fem	24	3	Not	Not	Not	Not	Not	Not	58	1.57	Not	Not	Not	Not	Not	Not	Not	Not	Not	Not	Not	Frequently	Always	Never	Sometimes	Never	Always	Frequently	Not	14 Sep 20	23.5304	7-11a	4	Not	Not	Not
520	2	Cusco	_	Masc	54	4	Not	Not	Not	Not		Not	81		Not	Not	Not	Not	Not	Yes	Not	Yes	Not	Yes	Not	Always	Always	Never	Sometimes	Never	Always	Always	Yes	20 Sep 20		7-11a	5	Not	Not	Not
260	3	Periphery of Cusco	62111	Fem	22	3	Not	Not	Not	Not	Not	Not	60	1.54	Yes	Yes	Not	Not	Yes	Yes	Not	Not	Yes	Yes	Yes	Always	Always	Never	Never	Never	Always	Always	Not	19 Sep 20	25.2994	12a+	4	Not	Not	Not
100	3	Periphery of Cusco	22271	Masc	21	3	Not	Not	Not	Not	Not	Not	75	1.6	Not	Not	Not	Not	Not	Not	Not	Not	Not	Not	Not	Frequently	Frequently	Never	Sometimes	Never	Frequently	Frequently	Yes	14 Sep 20	29.2969	12a+	4	Not	Not	Not
346	2	Periphery of Cusco	2507B	Masc	35	2	Not	Not	Not	Not	Not	Not	64	1.65	Not	Not	Yes	Not	Not	Not	Not	Not	Not	Not	Not	Always	Always	Always	Always	Always	Always	Always	Yes	25 Sep 20	23.5078	7-11a	4	Not	Not	Not
140	3	Cusco	89B	Masc	30	3	Not	Not	Not	Not	Not	Not	65	1.7	Not	Not	Yes	Not	Not	Not	Not	Not	Not	Not	Yes	Frequently	Frequently	Never	Frequently	Never	Frequently	Frequently	Yes	14 Sep 20	22.4914	7-11a	5	Not	Not
62	4	Periphery of Cusco	221	Masc	19	5	Not	Not	Not	Not		Not	70	1.67	Yes	Yes	Yes	Yes	Not	Not	Not	Not	Not	Not	Not		Frequently	Frequently			Frequently	Always	Not	14 Sep 20	25.0995	12a+	5	Yes	Not	Not
201	1	Quillabamba	Q201	Masc	43	1	Not	Not	Not	Not	Not	Not	84	1.67	Not	Not	Not	Not	Not	Not	Not	Not	Not	Not	Not	Always	Always	Sometimes	Never	Never	Always	Always	Not	14 Sep 20	30.1194	12a+	4	Not	Not	Not
320	4	Cusco	89	Masc	40	4	Not	Not	Not	Not	Not	Not	67	1.65	Not	Yes	Yes	Not	Not	Not	Yes	Yes	Yes	Not	Not	Frequently	Always	Always	Sometimes	Sometimes	Always	Always	Not	20 Sep 20	24.6097	12a+	5	Not	Not	Yes
284	2	Periphery of Cusco	62031	Masc	41	2	Not	Not	Not	Not	Not	Not	71	1.75	Not	Yes	Not	Not	Not	Not	Not	Not	Not	Not	Not	Always	Always	Never	Always	Never	Always	Always	Not	19 Sep 20	23.1837	12a+	3	Not	Not	Not
11	3	Periphery of Cusco	3.1	Masc	27	3	Not	Not	Not	Not	Not	Not	63	1.73	Not	Not	Not	Not	Not	Not	Not	Yes	Not	Not	Not	Always	Always				Always	Always	Not	14 Sep 20	21.0498	12a+	5	Not	Not	Not
220	1	Periphery of Cusco	-	Fem	20	1	Not	Not	Not	Not	Not	Not			Not	Not	Not	Yes	Yes	Not	Not	Not	Not	Yes	Yes	Always	Always			Always	Always	Always	Yes	18 Sep 20		12a+	3
296	1	Periphery of Cusco	226	Fem	60	3	Not	Yes	Not	Not	Not	Not	68	1.4	Not	Not	Not	Not	Not	Not	Not	Not	Not	Not	Not	Always	Frequently		Sometimes		Always	Always	Not	20 Sep 20	34.6939	<7a	3	Not	Not	Not
165	1	Quillabamba	22	Fem	19	1	Not	Not	Not	Not	Not	Not	71	1.51	Yes	Not	Not	Not	Yes	Not	Yes	Yes	Yes	Not	Not	Always	Always	Never	Never	Never	Always	Always	Not	14 Sep 20	31.139	7-11a	4	Not	Not	Not
244	1	Periphery of Cusco	5551	Masc	46	1	Not	Yes	Not	Not	Not	Not	80	1.7	Not	Not	Not	Not	Not	Not	Not	Not	Not	Not	Not	Frequently	Always	Never	Frequently	Never	Always	Always	Yes	19 Sep 20	27.6817	12a+	3	Not	Not	Not
930	1	Quillabamba	39	Fem	50	3	Not	Not	Not	Not	Not	Not			Not	Yes	Not	Not	Not	Not	Not	Not	Yes	Not	Not	Always	Always	Never	Never	Never	Always	Always	Not	20 Sep 20		12a+	4	Not	Not	Not
45	1	Cusco	1143C	Masc	60	2	Not	Not	Not	Not	Not	Not	89	1.79	Not	Not	Not	Not	Not	Not	Not	Not	Not	Not	Not	Always	Always	Sometimes	Never	Never	Always	Always	Not	14 Sep 20	27.7769	12a+	3	Not	Not	Not
103	3	Cusco	3163	Masc	34	3	Not	Not	Not	Not	Not	Not	64	1.68	Not	Not	Not	Not	Not	Not	Not	Not	Not	Not	Not	Always	Always	Never	Sometimes	Never	Always	Always	Not	14 Sep 20	22.6757	12a+	3	Not	Yes	Yes
405	2	Periphery of Cusco	50ME06	Masc	43	2	Not	Not	Not	Not	Not	Not	80	1.63	Yes	Yes	Yes	Not	Yes	Not	Not	Not	Yes	Not	Not	Frequently	Frequently	Never	Sometimes	Never	Frequently	Frequently	Yes	27 Sep 20	30.1103	12a+	5	Not	Yes	Yes
109	2	Periphery of Cusco	3822	Masc	25	3	Not	Not	Not	Not	Not	Not	70	1.8	Not	Not	Not	Not	Yes	Not	Not	Not	Not	Not	Not	Always	Always	Always	Never	Never	Always	Always	Yes	14 Sep 20	21.6049	12a+	4	Not	Yes	Yes
543	2	Cusco	45ER6	Masc	52	3	Not	Not	Not	Not	Not	Not	80	1.66	Yes	Not	Not	Not	Not	Not	Not	Not	Not	Yes	Not	Always	Sometimes	Never	Sometimes	Never	Always	Always	Yes	20 Sep 20	29.0318	7-11a	3	Not	Not	Not
465	3	Quillabamba	1015	Fem	24	3	Not	Not	Not	Not	Not	Not	57	1.62	Not	Not	Not	Not	Not	Not	Not	Yes	Not	Not	Not	Always	Always	Never	Never	Never	Always	Always	Yes	19 Sep 20	21.7192	12a+	3	Not	Yes	Yes
342	1	Periphery of Cusco	2509	Fem	59	3	Not	Not	Not	Not	Not	Not	68	1.5	Not	Not	Not	Not	Not	Not	Not	Not	Not	Not	Not	Always	Always	Sometimes	Frequently	Never	Frequently	Frequently	Yes	25 Sep 20	30.2222	<7a	5	Not	Not	Not
817	4	Cusco	25KG03	Masc	59	4	Not	Not	Not	Not	Not	Not	80	1.68	Not	Not	Not	Not	Not	Not	Not	Not	Not	Not	Not	Frequently	Frequently	Never	Sometimes	Sometimes	Frequently	Frequently	Yes	27 Sep 20	28.3447	12a+	5	Not	Yes	Yes
172	2	Quillabamba	15	Fem	40	3	Not	Not	Not	Not	Not	Not	70	1.55	Not	Yes	Not	Not	Not	Not	Not	Not	Not	Not	Not	Always	Always	Never	Never	Never	Always	Always	Not	14 Sep 20	29.1363	7-11a	4	Not	Not	Not
55	4	Periphery of Cusco	4463B	Masc	19	4	Not	Not	Not	Not	Not	Not	60	1.65	Not	Yes	Not	Not	Not	Not	Not	Not	Yes	Not	Not	Always	Always	Always	Always	Never	Always	Always	Not	14 Sep 20	22.0386	12a+	5	Not	Yes	Yes
286	1	Periphery of Cusco	66013	Fem	62	1	Not	Not	Not	Not	Not	Not	64	1.6	Not	Yes	Yes	Yes	Not	Not	Not	Yes	Yes	Yes	Not	Always	Always	Sometimes	Always	Never	Frequently	Always	Not	19 Sep 20	25	12a+	3	Not	Not	Yes
377	1	Periphery of Cusco	25A11	Fem	36	1	Not	Not	Not	Not	Not	Not	72	1.5	Not	Not	Not	Not	Yes	Not	Not	Not	Yes	Not	Yes	Frequently	Always	Never	Sometimes	Never	Frequently	Always	Yes	26 Sep 20	32	<7a	5	Not	Not	Not
720	1	Periphery of Cusco	45me09	Masc	53	3	Not	Not	Not	Not	Not	Not	95	1.78	Not	Yes	Not	Not	Not	Not	Not	Not	Not	Not	Not	Frequently	Frequently	Never	Frequently	Frequently	Frequently	Always	Not	27 Sep 20	29.9836	7-11a	4	Not	Not	Not
926	2	Quillabamba	35	Fem	48	3	Not	Not	Not	Not	Not	Not	52	1.56	Not	Not	Not	Not	Not	Not	Not	Not	Not	Not	Not	Always	Always	Never	Never	Never	Always	Always	Not	20 Sep 20	21.3675	12a+	3	Not	Not	Not
911	2	Quillabamba	20	Masc	21	3	Not	Not	Not	Not	Not	Not	70	1.7	Not	Not	Not	Not	Not	Not	Not	Not	Yes	Not	Not	Always	Always	Never	Never	Never	Always	Always	Yes	20 Sep 20	24.2215	12a+	4	Not	Not	Not
555	1	Cusco	45-2U8	Fem	43	1	Not	Not	Not	Not	Not	Not	68	1.64	Yes	Yes	Not	Not	Not	Yes	Not	Not	Yes	Not	Yes	Always	Always	Sometimes	Frequently	Never	Always	Always	Not	20 Sep 20	25.2826	<7a	5	Yes	Not	Not
450	1	Quillabamba	8	Fem	33	3	Not	Not	Not	Not	Not	Not	51	1.47	Not	Not	Not	Not	Not	Not	Not	Not	Not	Not	Not	Always	Always	Never	Never	Never	Always	Always	Not	20 Sep 20	23.6013	7-11a	3	Not	Not	Not
902	2	Quillabamba	11	Fem	61	2	Not	Not	Not	Not	Not	Not	79	1.62	Not	Not	Not	Not	Not	Not	Not	Not	Yes	Not	Not	Always	Always	Never	Never	Never	Always	Always	Not	20 Sep 20	30.1021	7-11a	3	Not	Not	Not
913	1	Quillabamba	22	Masc	54	2	Yes	Not	Not	Not	Not	Not			Not	Not	Not	Not	Not	Not	Not	Not	Yes	Not	Not	Always	Always	Never	Never	Never	Always	Always	Not	20 Sep 20		12a+	3	Not	Not	Yes
447	1	Quillabamba	5	Masc	43	5	Not	Not	Not	Not	Not	Not	105	1.75	Not	Not	Yes	Not	Not	Yes	Yes	Not	Yes	Not	Not	Always	Always	Never	Never	Never	Always	Always	Not	20 Sep 20	34.2857	12a+	3	Not	Not	Not
242	2	Periphery of Cusco	5521	Masc	43	2	Not	Not	Not	Not	Not	Not	75	1.7	Not	Yes	Yes	Not	Not	Not	Not	Not	Not	Not	Not	Always	Always	Frequently	Never	Never	Always	Always	Not	19 Sep 20	25.9516	12a+	4	Not	Not	Not
387	1	Periphery of Cusco	25A08	Fem	54	1	Not	Not	Not	Not	Not	Not	60	1.5	Not	Not	Not	Not	Not	Not	Not	Not	Not	Not	Not	Sometimes	Sometimes	Frequently	Sometimes	Sometimes	Always	Always	Not	26 Sep 20	26.6667	<7a	4	Not	Not	Not
148	1	Cusco	89J	Masc	51	3	Not	Not	Not	Not	Not	Not	68	1.73	Yes	Not	Not	Not	Yes	Not	Not	Not	Yes	Not	Not	Always	Always	Never	Always	Never	Frequently	Always	Not	14 Sep 20	22.7204	<7a	4	Not	Not	Not
214	1	Periphery of Cusco	214.1.10	Fem	34	2	Not	Not	Not	Not	Not	Not	55	1.53	Not	Not	Not	Not	Not	Not	Not	Not	Not	Not	Not	Always	Always	Sometimes	Frequently	Sometimes	Always	Always	Not	18 Sep 20	23.4952	12a+	4	Not	Not	Not
829	1	Cusco	45kg11B	Fem	48	3	Yes	Yes	Not	Yes	Not	Not	85	1.7	Not	Not	Not	Not	Not	Yes	Not	Not	Not	Not	Not	Always	Always		Always		Always	Always	Not	27 Sep 20	29.4118	12a+	5	Yes	Not	Yes
11	1	Periphery of Cusco	3.1	Fem	26	3	Not	Not	Not	Not	Not	Not	55	1.63	Not	Not	Not	Not	Not	Not	Not	Not	Not	Not	Not	Always	Always	Sometimes	Always	Sometimes	Always	Always	Not	14 Sep 20	20.7008	12a+	5	Not	Not	Not
528	1	Cusco	45 NT 02	Fem	50	1	Not	Not	Not	Not	Not	Not	62	1.6	Not	Not	Not	Not	Not	Not	Not	Not	Not	Not	Not	Always	Always	Sometimes	Sometimes	Sometimes	Always	Always	Not	20 Sep 20	24.2188	12a+	4	Not	Not	Not
249	1	Periphery of Cusco	77023	Masc	80	4	Not	Not	Not	Not	Not	Not	52	1.54	Not	Not	Not	Not	Not	Not	Not	Not	Not	Not	Not	Always	Frequently	Sometimes	Frequently	Never	Always	Always	Not	19 Sep 20	21.9261	12a+	4	Not	Not	Not
479	1	Quillabamba	1028	Fem	40	2	Not	Not	Not	Not	Not	Not	65	1.58	Not	Not	Yes	Not	Not	Not	Not	Not	Not	Not	Not	Always	Always	Never	Never	Never	Always	Always	Not	19 Sep 20	26.0375	12a+	3	Not	Not	Not
447	5	Quillabamba	5	Masc	49	5	Not	Not	Not	Not	Not	Not	81	1.71	Not	Not	Not	Not	Not	Not	Not	Not	Yes	Not	Not	Always	Always	Never	Never	Never	Always	Always	Not	20 Sep 20	27.7008	12a+	3	Not	Not	Not
910	1	Quillabamba	19	Masc	40	5	Not	Not	Not	Not	Not	Not	74	1.7	Not	Not	Not	Not	Not	Not	Not	Not	Yes	Not	Not	Always	Always	Never	Never	Never	Always	Always	Not	20 Sep 20	25.6055	12a+	5	Not	Not	Yes
12	1	Periphery of Cusco	32IMPUT	Fem	22	1	Not	Not	Not	Not	Not	Not	68	1.52	Not	Not	Not	Not	Not	Not	Not	Not	Not	Not	Not	Frequently	Frequently	Frequently	Frequently	Sometimes	Frequently	Frequently	Not	14 Sep 20	29.4321	12a+	4	Not	Not	Not
292	3	Cusco	21ant01	Masc	43	3	Not	Yes	Not	Not	Not	Not	75	1.7	Yes	Yes	Yes	Not	Not	Not	Yes	Not	Yes	Not	Not	Always	Always	Always	Sometimes	Never	Always	Always	Not	20 Sep 20	25.9516	12a+	3	Not	Yes	Yes
735	1	Cusco	45JL08	Fem	32	2	Not	Not	Not	Not	Not	Not	82	1.58	Yes	Yes	Yes	Yes	Yes	Not	Yes	Yes	Yes	Yes	Yes	Always	Always	Sometimes	Always	Frequently	Always	Always	Yes	27 Sep 20	32.8473	12a+	3	Not	Yes	Yes
255	1	Periphery of Cusco	62153	Masc	41	1	Not	Not	Not	Not	Not	Not	80	1.75	Not	Yes	Not	Not	Yes	Yes	Not	Not	Yes	Yes	Not	Always	Always	Never	Always	Never	Always	Always	Not	19 Sep 20	26.1225	12a+	3	Not	Not	Not
610	2	Periphery of Cusco	25-A21	Masc	59	2	Not	Not	Not	Not	Not	Not	57	1.62	Not	Not	Not	Not	Not	Not	Not	Not	Not	Not	Not	Always	Always	Never	Sometimes	Sometimes	Frequently	Always	Yes	26 Sep 20	21.7192	<7a	3	Not	Not	Not
539	1	Cusco	45ER4	Fem	19	4	Not	Not	Not	Not	Not	Not	50	1.57	Not	Not	Not	Not	Not	Not	Not	Not	Not	Not	Not	Always	Always	Never		Never	Always	Always	Yes	20 Sep 20	20.2848	7-11a	5	Not	Not	Not
1002-420	2	Periphery of Cusco	1743	Fem	36	2	Not	Not	Not	Not	Not	Not	60	1.5	Yes	Yes	Yes	Not	Not	Yes	Not	Not	Yes	Not	Not	Always	Always	Never	Never	Never	Always	Always	Yes	19 Sep 20	26.6667	<7a	4	Not	Yes	Yes
92	1	Periphery of Cusco	22242A	Fem	34	2	Not	Not	Not	Not	Not	Not	43	1.5	Not	Not	Not	Not	Not	Not	Not	Not	Not	Not	Not	Frequently	Frequently	Sometimes	Frequently	Never	Frequently	Frequently	Not	14 Sep 20	19.1111	12a+	5	Not	Not	Not
817	3	Cusco	25KG03	Fem	58	4	Not	Not	Not	Not	Not	Not	70	1.56	Not	Not	Not	Not	Not	Not	Not	Not	Not	Not	Not	Always	Always	Sometimes	Always	Sometimes	Always	Always	Not	27 Sep 20	28.764	12a+	5	Not	Yes	Yes
345	1	Periphery of Cusco	2515	Fem	62	1	Yes	Not	Not	Not	Not	Not			Not	Yes	Not	Not	Not	Not	Not	Not	Not	Not	Not	Always	Always	Never	Sometimes	Never	Always	Always	Yes	25 Sep 20		<7a	4	Not	Not	Not
282	2	Periphery of Cusco	1711	Fem	21	3	Not	Not	Not	Not	Not	Not	58	1.56	Not	Not	Not	Not	Not	Not	Not	Not	Not	Not	Not	Always	Always	Sometimes	Always	Sometimes	Always	Always	Not	19 Sep 20	23.833	7-11a	5	Not	Not	Not
729	2	Cusco	45DR19	Masc	24	2	Not	Not	Not	Not	Not	Not	60	1.68	Not	Not	Not	Not	Not	Not	Not	Not	Yes	Not	Yes	Always	Always	Never	Frequently	Never	Always	Always	Yes	27 Sep 20	21.2585	12a+	4	Not	Yes	Not
734	2	Cusco	45JL06	Masc	38	4	Not	Not	Not	Not	Not	Not	75	1.72	Not	Not	Not	Not	Not	Not	Not	Not	Not	Not	Not	Always	Always	Never	Never	Never	Always	Always	Not	27 Sep 20	25.3515	7-11a	5	Not	Not	Not
155	2	Cusco	89Q	Fem	18	2	Not	Not	Not	Not	Not	Not	52	1.54	Not	Yes	Not	Not	Yes	Not	Not	Not	Yes	Not	Not	Always	Always		Sometimes	Sometimes	Always	Always	Not	14 Sep 20	21.9261	<7a	5	Not	Not	Not
295	1	Periphery of Cusco	-	Masc	55	2	Not	Not	Not	Not	Not	Not	66	1.57	Not	Not	Not	Not	Not	Not	Not	Not	Not	Not	Not	Always							Yes	20 Sep 20	26.7759	7-11a	3	Not	Not	Not
289	2	Cusco	2111	Fem	78	3	Not	Not	Not	Not	Not	Not	58	1.56	Not	Not	Not	Not	Not	Yes	Not	Not	Yes	Not	Not	Always	Always	Never	Always	Sometimes	Always	Always	Not	20 Sep 20	23.833	12a+	3	Not	Not	Not
904	3	Quillabamba	13	Fem	18	3	Not	Not	Not	Not	Not	Not	61	1.57	Not	Not	Not	Not	Not	Not	Not	Not	Not	Not	Not	Always	Always	Never	Never	Never	Always	Always	Not	20 Sep 20	24.7475	12a+	5	Not	Not	Not
194	1	Quillabamba	Q194	Fem	51	8	Not	Not	Not	Not	Not	Not	100	1.62	Not	Not	Not	Not	Not	Not	Not	Not	Not	Not	Not	Always	Always	Never	Sometimes	Never	Frequently	Always	Not	14 Sep 20	38.1039	12a+	5	Not	Not	Not
622	1	Periphery of Cusco	25A33	Fem	48	1	Yes	Not	Not	Not	Not	Not	78	1.69	Not	Yes	Not	Not	Not	Not	Not	Not	Not	Yes	Not	Frequently	Frequently	Never	Sometimes	Sometimes	Frequently	Sometimes	Not	26 Sep 20	27.31	7-11a	3	Not	Yes	Yes
112	1	Periphery of Cusco	3811	Fem	53	2	Not	Not	Not	Not	Not	Not	82	1.57	Not	Yes	Yes	Not	Not	Not	Yes	Not	Yes	Not	Not	Always	Always	Never	Frequently	Never	Always	Always	Not	14 Sep 20	33.2671	12a+	4	Not	Not	Not
561	2	Cusco	560.1.10	Masc	29	2	Not	Not	Not	Not	Not	Not	70	1.75	Not	Yes	Not	Not	Not	Not	Not	Not	Not	Not	Not	Always	Always	Never	Frequently	Never	Always	Always	Not	20 Sep 20	22.8571	7-11a	4	Not	Yes
703	2	Cusco	45NE17	Fem	30	4	Not	Not	Not	Not	Not	Not	70	1.62	Not	Not	Not	Not	Yes	Not	Not	Not	Yes	Not	Not	Frequently	Frequently	Sometimes	Sometimes	Never	Frequently	Frequently	Yes	27 Sep 20	26.6728	12a+	4	Not	Not	Not
203	1	Quillabamba	Q203	Fem	53	4	Not	Not	Not	Not	Not	Not	70	1.6	Not	Not	Not	Not	Not	Not	Not	Not	Not	Not	Not	Always	Always	Frequently	Sometimes	Never	Always	Always	Not	14 Sep 20	27.3438	12a+	4	Not	Not	Not
550	2	Cusco	45ER10	Fem	36	2	Not	Not	Not	Not	Not	Not	50	1.51	Not	Not	Not	Not	Not	Not	Not	Not	Yes	Yes	Not	Always	Always	Never	Sometimes	Never	Always	Always	Not	20 Sep 20	21.9289	12a+	4	Not	Not	Not
442	2	Quillabamba	9	Fem	54	7	Not	Not	Not	Not	Not	Not	70	1.5	Not	Not	Not	Not	Not	Not	Not	Not	Not	Not	Not	Always	Always	Never	Never	Never	Always	Always	Not	20 Sep 20	31.1111	<7a	3	Not	Not	Not
260	2	Periphery of Cusco	62111	Fem	50	3	Not	Not	Not	Not	Not	Not	68	1.6	Yes	Not	Yes	Not	Yes	Yes	Not	Yes	Yes	Yes	Yes	Always	Always	Never	Sometimes	Never	Always	Always	Yes	19 Sep 20	26.5625	7-11a	4	Not	Not	Not
470	3	Quillabamba	1020	Fem	22	3	Yes	Not	Not	Not	Not	Not	63	1.52	Not	Not	Not	Not	Not	Not	Not	Not	Not	Not	Not	Always	Always	Never	Never	Never	Always	Always	Not	19 Sep 20	27.268	7-11a	5	Not	Not	Not
230	1	Periphery of Cusco	8371	Fem		1	Not	Not	Not	Not	Not	Not	50	1.41	Not	Not	Not	Not	Not	Not	Not	Not	Not	Not	Not	Always	Always	Never	Always		Frequently	Always	Not	18 Sep 20	25.1496	7-11a	5	Not	Not	Not
829	3	Cusco	45kg11B	Masc	19	3	Not	Not	Not	Not	Not	Not	68	1.7	Not	Not	Not	Not	Not	Yes	Not	Not	Not	Not	Not	Always	Always	Always	Always	Sometimes	Always	Always	Not	27 Sep 20	23.5294	12a+	5	Yes	Not	Yes
44	3	Cusco	1143B	Fem	52	3	Not	Not	Not	Not	Not	Not	51	1.5	Not	Yes	Not	Not	Not	Not	Not	Not	Yes	Not	Not	Always	Always	Always	Frequently	Frequently	Always	Always	Not	14 Sep 20	22.6667	12a+	3	Not	Not	Not
447	4	Quillabamba	5	Fem	67	5	Not	Yes	Not	Not	Not	Not	78	1.5	Not	Not	Not	Not	Not	Not	Not	Not	Yes	Yes	Not	Always	Always	Never	Never	Never	Always	Always	Not	20 Sep 20	34.6667	7-11a	3	Not	Not	Not
407	2	Periphery of Cusco	50ME07	Fem	38	2	Not	Not	Not	Not	Not	Not	80	1.62	Not	Not	Not	Not	Not	Not	Not	Not	Not	Not	Not	Always	Always	Frequently	Frequently	Frequently	Always	Always	Not	27 Sep 20	30.4832	12a+	3	Not	Not	Not
451	2	Quillabamba	1001	Fem	31	2	Not	Not	Not	Not	Not	Not	67	1.6	Not	Not	Not	Not	Not	Not	Not	Not	Not	Not	Not	Always	Always	Never	Always	Never	Always	Always	Yes	19 Sep 20	26.1719	12a+	3	Not	Yes	Yes
709	4	Periphery of Cusco	45ME03	Fem	53	4	Not	Not	Not	Not	Not	Not	72	1.47	Not	Not	Not	Not	Not	Not	Not	Not	Yes	Not	Not	Frequently	Frequently	Never	Sometimes	Never	Frequently	Frequently	Yes	27 Sep 20	33.3195	7-11a	4	Not	Not	Not
290	1	Cusco	2112	Masc	66	1	Not	Not	Not	Not	Not	Not	85	1.61	Yes	Not	Not	Not	Not	Not	Not	Not	Not	Not	Not	Always	Always	Never	Never	Never	Always	Frequently	Not	20 Sep 20	32.7919	12a+	3	Not	Not	Not
537	2	Cusco	45ER2	Masc	50	4	Not	Not	Not	Not	Not	Not	64	1.63	Not	Yes	Not	Not	Not	Not	Not	Not	Not	Not	Not	Always	Always	Never	Sometimes	Never	Always	Always	Yes	20 Sep 20	24.0882	12a+	5	Not	Not	Not
927	1	Quillabamba	36	Fem	18	3	Not	Not	Not	Not	Not	Not	70	1.64	Not	Not	Not	Not	Not	Not	Not	Not	Not	Not	Not	Always	Always	Never	Never	Never	Always	Always	Not	20 Sep 20	26.0262	7-11a	3	Not	Not	Not
628	2	Cusco	212B30	Masc	44	2	Not	Not	Not	Not	Not	Not	94	1.72	Not	Not	Not	Not	Yes	Not	Not	Not	Not	Not	Not	Always	Always	Never	Frequently	Never	Always	Always	Not	26 Sep 20	31.7739	12a+	3	Not	Yes	Yes
522	1	Cusco	45 ANT 01-b	Fem	29	1	Not	Not	Not	Not	Not	Not	60	1.6	Not	Not	Yes	Not	Not	Yes	Not	Not	Yes	Not	Not	Always	Always	Never	Always	Never	Always	Always	Not	20 Sep 20	23.4375	7-11a	3	Not	Not	Not
620	3	Periphery of Cusco	25A31	Masc	66	3	Not	Not	Not	Not	Not	Not	72	1.52	Yes	Yes	Not	Not	Not	Yes	Not	Yes	Not	Not	Not	Sometimes	Always	Never	Sometimes	Never	Always	Always	Not	26 Sep 20	31.1634	7-11a	4	Not	Not	Not
289	1	Cusco	2111	Masc	46	3	Not	Not	Not	Not	Not	Not	90	1.75	Not	Not	Not	Not	Not	Not	Not	Not	Not	Not	Not	Always	Always	Never	Never	Frequently	Frequently	Always	Not	20 Sep 20	29.3878	12a+	3	Not	Not	Not
56	1	Cusco	1142B	Fem	24	4	Not	Not	Not	Not	Not	Not	62	1.6	Not	Yes	Not	Not	Not	Not	Not	Not	Not	Not	Not	Always	Always	Frequently	Always	Always	Always	Always	Not	14 Sep 20	24.2188	12a+	5	Not	Yes	Yes
926	1	Quillabamba	35	Masc	45	3	Not	Not	Not	Not	Not	Not	80	1.75	Not	Not	Not	Not	Not	Not	Not	Not	Not	Not	Not	Always	Always	Never	Never	Never	Always	Always	Not	20 Sep 20	26.1225	12a+	3	Not	Not	Not
402	3	Periphery of Cusco	-	Masc	20	3	Not	Not	Not	Not	Not	Not	67	1.7	Not	Not	Not	Not	Not	Not	Not	Not	Not	Not	Not	Frequently	Frequently	Never	Sometimes	Never	Frequently	Frequently	Not	27 Sep 20	23.1834	7-11a	5	Not	Yes	Yes
814	1	Periphery of Cusco	4451	Masc	47	1	Not	Not	Not	Not	Not	Not	72	1.7	Not	Not	Not	Not	Not	Not	Not	Not	Yes	Not	Not	Always	Always	Never	Always	Never	Always	Always	Not	26 Sep 20	24.9135	12a+	5	Yes	Yes	Not
734	4	Cusco	45JL06	Fem	18	4	Not	Not	Not	Not	Not	Not	49	1.63	Not	Not	Not	Not	Not	Not	Not	Not	Not	Not	Not		Always		Sometimes	Never	Always	Always	Yes	27 Sep 20	18.4425	7-11a	5	Not	Not	Not
256	5	Periphery of Cusco	77064	Fem	50	5	Not	Not	Not	Not	Not	Not	71	1.55	Not	Not	Not	Not	Not	Not	Not	Not	Not	Yes	Not	Always	Always	Never	Sometimes	Sometimes	Always	Always	Not	19 Sep 20	29.5526	12a+	5	Not	Not	Not
33	4	Cusco	1163	Masc	20	4	Not	Not	Not	Not	Not	Not	67	1.67	Not	Not	Not	Not	Not	Not	Not	Not	Not	Not	Not	Always	Always	Never	Always	Never	Always	Always	Yes	14 Sep 20	24.0238	12a+	4	Yes	Yes	Yes
912	4	Quillabamba	21	Fem	21	4	Not	Not	Not	Not	Not	Not	50	1.53	Not	Not	Not	Not	Not	Not	Not	Not	Yes	Not	Not	Always	Always	Never	Never	Never	Always	Always	Not	20 Sep 20	21.3593	12a+	5	Not	Not	Not
85	1	Periphery of Cusco	411C	Fem	25	2	Not	Not	Not	Not	Not	Not	71	1.61	Not	Not	Not	Not	Not	Not	Not	Not	Not	Not	Not	Always	Always	Never	Always	Always	Always	Always	Not	14 Sep 20	27.3909	7-11a	4	Not	Not	Not
701	2	Periphery of Cusco	45ME1B	Masc	32	2	Not	Not	Not	Not	Not	Not	82	1.72	Not	Not	Yes	Not	Not	Not	Yes	Not	Not	Not	Not	Sometimes	Always	Never	Sometimes	Never	Always	Frequently	Not	27 Sep 20	27.7177	12a+	4	Not	Not	Not
376	2	Periphery of Cusco	25A12	Fem	24	3	Not	Not	Not	Not	Not	Not	45	1.57	Not	Not	Not	Not	Not	Not	Not	Not	Yes	Not	Not	Frequently	Always	Sometimes	Sometimes	Never	Always	Always	Not	26 Sep 20	18.2563	12a+	5	Not	Not	Not
742	2	Cusco	45JL16	Fem	22	3	Not	Not	Not	Not	Not	Not	64	1.6	Not	Not	Not	Not	Not	Not	Not	Yes	Not	Not	Not	Always	Always	Sometimes	Always	Sometimes	Frequently	Always	Not	27 Sep 20	25	12a+	3	Not	Not	Not
21	2	Cusco	3113	Masc	84	2	Yes	Not	Not	Not	Not	Not	92	1.8	Not	Not	Not	Not	Not	Yes	Not	Not	Not	Not	Not	Always	Always	Always	Always	Always	Always	Always	Not	14 Sep 20	28.3951	12a+	4	Not	Not	Not
703	3	Cusco	45NE17	Masc	73	4	Not	Not	Not	Not	Not	Not	75	1.68	Not	Not	Not	Not	Not	Not	Not	Not	Not	Not	Not	Frequently	Frequently	Never	Never	Never	Frequently	Frequently	Yes	27 Sep 20	26.5731	7-11a	4	Not	Not	Not
110	4	Periphery of Cusco	3812	Fem	46	5	Not	Not	Not	Not	Not	Not	75	1.57	Yes	Not	Not	Not	Yes	Yes	Not	Yes	Yes	Yes	Yes	Frequently	Always	Frequently	Frequently	Never	Always	Always	Not	14 Sep 20	30.4272	12a+	5	Not	Not	Not
26	2	Periphery of Cusco	49712	Fem	42	2	Not	Not	Not	Not	Not	Not	74	1.6	Not	Not	Not	Not	Yes	Yes	Not	Not	Not	Yes	Not	Frequently	Frequently	Frequently	Frequently		Frequently	Frequently	Not	14 Sep 20	28.9062	12a+	3	Not	Not	Yes
716	1	Periphery of Cusco	45ME09B	Masc	52	2	Not	Not	Not	Not	Not	Not	112	1.74	Not	Yes	Not	Not	Not	Not	Not	Yes	Yes	Not	Not	Always	Frequently	Always	Frequently	Sometimes	Frequently	Always	Not	27 Sep 20	36.993	12a+	5	Not	Yes	Yes
151	3	Cusco	89M	Fem	36	3	Not	Not	Not	Not	Not	Not	69	1.58	Not	Yes	Not	Not	Not	Not	Not	Not	Not	Not	Not	Always	Always	Frequently	Always	Frequently	Always	Always	Yes	14 Sep 20	27.6398	<7a	4	Not	Not	Not
79	3	Periphery of Cusco	452	Fem	20	3	Not	Not	Not	Not	Not	Not	60	1.48	Not	Not	Not	Not	Not	Not	Not	Not	Not	Not	Not	Always	Always	Sometimes	Always	Always	Always	Always	Not	14 Sep 20	27.3923	12a+	3	Not	Not	Not
733	1	Cusco	45JL07	Masc	40	3	Not	Not	Not	Not	Not	Not	75	1.8	Not	Not	Not	Not	Not	Not	Not	Not	Not	Not	Not	Always	Always	Never	Always	Sometimes	Always	Always	Yes	27 Sep 20	23.1482	12a+	4	Not	Not	Not
18	1	Periphery of Cusco	34	Fem	52	1	Yes	Not	Yes	Not	Not	Not	74	1.55	Not	Not	Yes	Not	Not	Not	Not	Not	Not	Not	Not	Always	Always		Always	Always	Always	Always	Yes	14 Sep 20	30.8012	7-11a	3	Not	Not	Not
508	1	Cusco	21kc05	Fem	46	3	Not	Not	Not	Not	Not	Not	58	1.6	Not	Yes	Not	Not	Yes	Not	Not	Not	Not	Not	Not	Always	Always	Sometimes	Sometimes	Never	Frequently	Always	Not	20 Sep 20	22.6562	12a+	3	Yes	Not	Yes
279	2	Periphery of Cusco	6253	Fem	53	3	Not	Not	Not	Not	Not	Not			Not	Not	Yes	Not	Not	Not	Not	Not	Not	Not	Not	Frequently	Always	Never		Frequently	Always	Always	Yes	19 Sep 20		12a+	4	Yes	Yes	Yes
515	2	Cusco	5	Masc	66	3	Not	Not	Not	Not	Not	Not	77	1.62	Not	Not	Yes	Not	Not	Not	Not	Not	Not	Yes	Not	Frequently	Always	Never	Never	Never	Always	Frequently	Not	20 Sep 20	29.34	7-11a	3	Not	Yes	Not
605	1	Periphery of Cusco	29 - JR - 02	Masc	49	4	Not	Not	Not	Not	Not	Not	80	1.62	Yes	Not	Not	Not	Not	Not	Not	Not	Not	Not	Not	Always	Always	Never	Sometimes	Never	Always	Always	Yes	27 Sep 20	30.4832	7-11a	5	Not	Not	Not
88	1	Periphery of Cusco	411F	Fem	26	2	Not	Not	Not	Not	Not	Not	60	1.56	Not	Not	Not	Not	Not	Not	Not	Yes	Not	Not	Not	Always	Always	Never	Sometimes	Never	Always	Always	Not	14 Sep 20	24.6548	12a+	3	Not	Not	Not
197	3	Quillabamba	Q197	Masc	59	4	Not	Not	Not	Not	Not	Not	87	1.75	Not	Not	Not	Not	Not	Not	Not	Not	Not	Not	Not	Always	Always	Sometimes	Never	Never	Always	Always	Yes	14 Sep 20	28.4082	12a+	4	Not	Not	Not
819	3	Cusco	45kg02	Fem	22	3	Not	Not	Not	Not	Not	Not	60	1.55	Not	Not	Not	Not	Not	Not	Not	Not	Not	Not	Not	Always	Always	Never	Sometimes	Sometimes	Always	Always	Not	27 Sep 20	24.974	12a+	4	Not	Not	Not
53	3	Periphery of Cusco	4453	Masc	20	4	Not	Not	Not	Not	Not	Not	67	1.8	Not	Not	Not	Yes	Yes	Yes	Yes	Yes	Not	Yes	Yes	Sometimes	Always	Never	Sometimes	Never	Always	Sometimes	Yes	14 Sep 20	20.679	12a+	4	Not	Yes	Yes
206	1	Quillabamba	Q206	Masc	42	2	Not	Not	Not	Not	Not	Not	75		Not	Not	Yes	Not	Not	Not	Not	Not	Yes	Not	Not	Frequently	Always	Never	Sometimes	Sometimes	Always	Always	Not	14 Sep 20		12a+	3	Not	Yes	Not
114	2	Periphery of Cusco	3853	Fem	23	3	Not	Not	Not	Not	Not	Not	52	1.58	Not	Not	Not	Not	Not	Not	Not	Not	Not	Not	Not	Always	Always	Always	Always		Always	Always	Yes	14 Sep 20	20.83	12a+	4	Not	Not	Yes
256	1	Periphery of Cusco	77064	Masc	28	5	Not	Not	Not	Not	Not	Not	73	1.7	Not	Not	Not	Not	Not	Not	Not	Not	Not	Not	Not	Always	Always	Sometimes	Never	Sometimes	Frequently	Always	Not	19 Sep 20	25.2595	12a+	5	Not	Not	Not
829	2	Cusco	45kg11B	Masc	27	3	Not	Not	Not	Not	Not	Not	90	1.8	Not	Not	Not	Not	Not	Yes	Not	Not	Not	Not	Not	Frequently	Always	Always	Always	Sometimes	Frequently	Frequently	Not	27 Sep 20	27.7778	12a+	5	Yes	Not	Yes
553	4	Cusco	45ER13	Masc	28	4	Not	Not	Not	Not	Not	Not	75	1.69	Not	Not	Not	Not	Not	Not	Not	Not	Yes	Yes	Not	Always	Always	Never	Sometimes	Never	Always	Always	Not	20 Sep 20	26.2596	12a+	3	Not	Not	Not
1001-419	3	Periphery of Cusco	1733	Masc	22	3	Not	Not	Not	Not	Not	Not	70	1.7	Not	Not	Not	Not	Not	Not	Not	Not	Not	Not	Not	Frequently	Always	Sometimes	Never	Never	Always	Always	Not	19 Sep 20	24.2215	12a+	4	Not	Yes	Yes
261	3	Periphery of Cusco	62112	Fem	28	3	Not	Not	Not	Not	Not	Not	62	1.57	Not	Not	Not	Not	Not	Not	Not	Not	Not	Not	Not	Always	Always	Never	Always	Sometimes	Always	Always	Yes	19 Sep 20	25.1532	12a+	5	Not	Not	Not
933	1	Quillabamba	42	Masc	61	2	Not	Not	Not	Not	Not	Not			Not	Yes	Not	Not	Not	Not	Not	Not	Yes	Not	Not	Always	Always	Never	Never	Never	Always	Always	Not	20 Sep 20		7-11a	4	Not	Not	Not
740	1	Cusco	45JL12	Masc	41	2	Not	Not	Not	Not	Not	Not	73	1.67	Not	Yes	Yes	Not	Not	Yes	Not	Yes	Not	Not	Not	Always	Always	Always	Always	Sometimes	Always	Always	Not	27 Sep 20	26.1752	12a+	3	Not	Not	Not
191	2	Quillabamba	191.1.10	Fem	53	2	Not	Not	Not	Not	Not	Not	71	1.6	Not	Not	Not	Not	Not	Not	Not	Not	Not	Not	Not	Always	Always		Always	Never	Always	Always	Not	14 Sep 20	27.7344	7-11a	4	Not	Not	Not
556	2	Cusco	556.1.10	Masc	30	3	Not	Not	Not	Not	Not	Not	65	1.76	Not	Not	Not	Not	Not	Not	Not	Not	Not	Not	Not	Always	Always	Never	Frequently	Never	Always	Always	Not	20 Sep 20	20.984	12a+	3	Not	Not	Not
256	4	Periphery of Cusco	77064	Masc	50	5	Not	Not	Not	Not	Not	Not	95	1.72	Not	Not	Not	Not	Not	Not	Not	Not	Not	Not	Not	Always	Always	Never	Always	Never	Always	Always	Not	19 Sep 20	32.112		5	Not	Not	Not
508	3	Cusco	21kc05	Fem	82	3	Yes	Yes	Not	Not	Not	Not	78	1.56	Not	Not	Not	Not	Not	Not	Not	Not	Yes	Not	Not	Always	Always	Sometimes	Always	Sometimes	Always	Always	Not	20 Sep 20	32.0513	<7a	3	Yes	Not	Yes
525	2	Cusco	45 ANT 05	Masc	32	5	Not	Not	Not	Not	Not	Not	74	1.6	Yes	Not	Not	Not	Not	Not	Not	Yes	Yes	Not	Not	Always	Always	Sometimes	Always	Never	Always	Always	Yes	20 Sep 20	28.9062	12a+	5	Not	Not	Not
143	1	Cusco	89E	Fem	30	3	Yes	Not	Not	Not	Not	Not	81	1.6	Not	Not	Not	Not	Not	Not	Not	Not	Not	Not	Not	Always	Always	Never	Always	Sometimes	Always	Always	Yes	14 Sep 20	31.6406	<7a	4	Not	Not	Not
480	1	Quillabamba	1029	Masc	36	1	Not	Not	Not	Not	Not	Not	74	1.69	Not	Not	Not	Not	Not	Not	Yes	Not	Yes	Not	Not	Always	Always	Never	Never	Never	Always	Always	Not	19 Sep 20	25.9095	7-11a	4	Not	Not	Not
162	2	Quillabamba	6	Masc	48	4	Not	Not	Not	Not	Not	Not	72	1.67	Not	Not	Yes	Not	Not	Not	Not	Not	Not	Not	Not	Frequently	Always	Never	Never	Never	Always	Always	Not	14 Sep 20	25.8166	12a+	4	Not	Not	Not
216	1	Periphery of Cusco	216-N-1.10	Fem	89	2	Not	Not	Not	Not	Not	Not	65	1.58	Not	Not	Not	Not	Not	Not	Not	Not	Not	Yes	Not	Always	Never	Never	Never	Never	Always	Always	Not	18 Sep 20	26.0375	<7a	3	Not	Not	Yes
340	1	Periphery of Cusco	2514	Fem	33	1	Not	Not	Not	Not	Not	Not	62	1.53	Not	Not	Not	Not	Not	Yes	Not	Not	Yes	Not	Yes	Always	Always	Never	Sometimes	Sometimes	Always	Always	Yes	25 Sep 20	26.4855	7-11a	3	Not	Yes	Not
318	1	Cusco	45ER20	Masc	32	2	Not	Not	Not	Not	Not	Not	82	1.6	Not	Yes	Yes	Yes	Yes	Yes	Yes	Not	Yes	Yes	Yes	Always	Always	Never	Always	Never	Always	Always	Yes	20 Sep 20	32.0312	12a+	3	Not	Yes	Yes
414	2	Periphery of Cusco	50KG02	Masc	24	4	Not	Not	Not	Not	Not	Not	68	1.71	Not	Not	Not	Not	Not	Not	Not	Not	Not	Not	Not	Always	Always		Always	Never	Frequently	Sometimes	Not	27 Sep 20	23.255	12a+	5	Not	Not	Not
72	3	Periphery of Cusco	412	Masc	23	3	Not	Not	Not	Not	Not	Not	70	1.73	Not	Not	Not	Not	Not	Not	Not	Not	Not	Not	Not	Always	Always	Never	Frequently	Frequently	Always	Always	Yes	14 Sep 20	23.3887	12a+	3	Yes	Yes	Yes
547	2	Cusco	45ER10	Masc	50	3	Not	Not	Not	Not	Not	Not	70	1.72	Not	Yes	Not	Not	Not	Not	Not	Yes	Not	Not	Not	Always	Always	Sometimes	Sometimes	Never	Always	Always	Not	20 Sep 20	23.6614	12a+	3	Not	Not	Yes
811	2	Periphery of Cusco	4473	Fem	22	2	Not	Not	Not	Not	Not	Not	52	1.5	Yes	Yes	Yes	Not	Not	Not	Yes	Not	Yes	Not	Not	Always	Always	Always	Always	Sometimes	Always	Always	Not	26 Sep 20	23.1111	12a+	4	Not	Not	Not
385	3	Periphery of Cusco	25A06	Masc	46	4	Not	Not	Not	Not	Not	Not	80	1.72	Not	Yes	Yes	Not	Yes	Yes	Not	Not	Yes	Yes	Yes	Frequently	Frequently		Frequently		Frequently		Yes	26 Sep 20	27.0417	7-11a	5	Not	Not	Not
803	2	Periphery of Cusco	4422	Fem	41	3	Not	Not	Not	Not	Not	Not	73	1.6	Not	Not	Yes	Not	Not	Not	Not	Not	Yes	Not	Not	Sometimes	Frequently	Sometimes	Frequently		Sometimes	Always	Not	26 Sep 20	28.5156	12a+	5	Not	Not	Not
62	3	Periphery of Cusco	221	Masc	22	5	Not	Not	Not	Not	Not	Not			Not	Not	Yes	Yes	Yes	Not	Not	Yes	Not	Not	Yes	Frequently	Frequently	Frequently			Frequently		Not	14 Sep 20		12a+	5	Yes	Not	Not
611	1	Periphery of Cusco	25-A-22	Fem	35	3	Not	Not	Not	Not	Not	Not	75	1.53	Yes	Yes	Not	Not	Yes	Not	Not	Not	Not	Not	Not	Always	Always	Never	Sometimes	Never	Always	Always	Not	26 Sep 20	32.039	<7a	3	Not	Not	Not
242	1	Periphery of Cusco	5521	Fem	41	2	Not	Not	Not	Not	Not	Not	70		Not	Not	Not	Not	Not	Not	Not	Not	Not	Not	Not	Frequently	Always	Never	Always	Never	Always	Frequently	Not	19 Sep 20		12a+	4	Not	Not	Not
620	2	Periphery of Cusco	25A31	Fem	55	3	Not	Yes	Not	Not	Not	Not	69	1.5	Yes	Yes	Not	Not	Not	Not	Not	Not	Yes	Not	Not	Always	Always	Never	Always	Always	Always	Always	Not	26 Sep 20	30.6667	12a+	4	Not	Not	Not
360	3	Cusco	452B19	Masc	51	3	Not	Not	Not	Not	Not	Not	74	1.6	Not	Not	Yes	Yes	Not	Not	Not	Not	Not	Not	Not	Always	Always	Never	Frequently	Never	Always	Always	Yes	26 Sep 20	28.9062	12a+	5
289	3	Cusco	2111	Fem	49	3	Not	Not	Not	Not	Not	Not	58	1.62	Not	Not	Not	Not	Not	Not	Not	Not	Yes	Not	Not	Always	Always	Never	Sometimes	Sometimes	Always	Always	Not	20 Sep 20	22.1003	12a+	3	Not	Not	Not
6	2	Periphery of Cusco	22233	Masc	38	2	Not	Not	Not	Not	Not	Not			Not	Not	Not	Not	Not	Not	Not	Not	Not	Not	Not	Frequently	Always	Never	Never	Never	Frequently	Frequently	Not	14 Sep 20		7-11a	4	Not	Not	Not
214	2	Periphery of Cusco	214.1.10	Fem	36	2	Not	Not	Not	Not	Not	Not	54	1.55	Not	Not	Not	Not	Not	Not	Not	Not	Not	Not	Not	Always	Always		Sometimes		Always	Always	Yes	18 Sep 20	22.4766	12a+	4	Not	Not	Not
927	3	Quillabamba	36	Fem	24	3	Not	Not	Not	Not	Not	Not	55	1.59	Not	Not	Not	Not	Not	Not	Not	Not	Yes	Not	Not	Always	Always	Never	Never	Never	Always	Always	Yes	20 Sep 20	21.7555	12a+	3	Not	Not	Not
533	1	Cusco	45ANT08	Fem	42	1	Not	Not	Not	Not	Not	Not	58	1.6	Not	Not	Not	Not	Not	Not	Not	Not	Yes	Not	Not	Always	Always	Never	Frequently	Frequently	Always	Always	Yes	20 Sep 20	22.6562	12a+	3	Not	Not	Not
261	1	Periphery of Cusco	62112	Fem	52	3	Not	Not	Not	Not	Not	Not	70	1.69	Not	Yes	Yes	Not	Yes	Not	Not	Not	Yes	Yes	Not	Always	Always	Never	Sometimes	Sometimes	Always	Always	Yes	19 Sep 20	24.5089	12a+	5	Not	Not	Not
288	2	Periphery of Cusco	66022	Masc	71	2	Not	Not	Not	Not	Not	Not	78	1.78	Not	Not	Not	Yes	Not	Not	Not	Not	Not	Not	Not	Always	Always	Never	Frequently	Never	Always	Always	Yes	19 Sep 20	24.6181	7-11a	5	Not	Yes	Yes
614	1	Periphery of Cusco	24A25	Masc	20	3	Not	Not	Not	Not	Not	Not	66	1.68	Yes	Yes	Not	Not	Yes	Not	Yes	Yes	Yes	Not	Not	Frequently	Always	Frequently	Frequently	Sometimes	Frequently	Always	Not	26 Sep 20	23.3844	12a+	5	Not	Not	Yes
558	3	Cusco	558.1.10	Fem		3	Not	Not	Not	Not		Not	100	1.72	Yes	Yes	Yes	Not	Not	Not	Not	Not	Yes	Not	Not	Always	Always	Never	Frequently	Never	Always	Always	Yes	20 Sep 20	33.8021	7-11a	4	Not	Not	Not
384	1	Periphery of Cusco	25A05	Masc	27	1	Not	Not	Not	Not	Not	Not	70	1.69	Not	Not	Not	Not	Not	Not	Not	Not	Not	Not	Not	Sometimes	Always	Never	Never	Never	Always	Frequently	Not	26 Sep 20	24.5089	12a+	3	Not	Yes	Yes
719	2	Periphery of Cusco	45ME06	Fem	20	2	Not	Not	Not	Not	Not	Not	58	1.5	Not	Not	Not	Not	Not	Not	Not	Not	Not	Not	Not	Frequently	Frequently	Never	Never	Never	Frequently	Frequently	Not	27 Sep 20	25.7778	<7a	3	Not	Not	Not
43	2	Cusco	1143A	Masc	43	3	Not	Not	Not	Not	Not	Yes	72	1.85	Not	Not	Not	Not	Not	Not	Yes	Not	Not	Not	Not	Always	Always	Never	Never	Never	Always	Always	Not	14 Sep 20	21.0373	12a+	4	Not	Not	Yes
376	1	Periphery of Cusco	25A12	Masc	21	3	Not	Not	Not	Not	Not	Not	63	1.72	Not	Yes	Not	Not	Not	Not	Not	Yes	Yes	Not	Not	Frequently	Always	Sometimes	Sometimes	Never	Frequently	Always	Not	26 Sep 20	21.2953	12a+	5	Not	Not	Not
100	1	Periphery of Cusco	22271	Masc	42	3	Not	Not	Not	Not	Not	Not	70	1.62	Yes	Not	Not	Yes	Yes	Not	Yes	Not	Yes	Yes	Not	Frequently	Frequently	Never	Sometimes	Never	Frequently	Frequently	Yes	14 Sep 20	26.6728	12a+	4	Not	Not	Not
932	3	Quillabamba	41	Masc	27	4	Not	Not	Not	Not	Not	Not			Not	Not	Not	Not	Not	Not	Yes	Not	Yes	Not	Not	Always	Always	Never	Never	Never	Always	Always	Not	20 Sep 20		12a+	4	Not	Not	Not
709	2	Periphery of Cusco	45ME03	Fem	33	4	Not	Not	Not	Not	Not	Not	80	1.53	Not	Not	Not	Not	Not	Not	Not	Yes	Yes	Yes	Not	Frequently	Frequently	Never	Sometimes	Never	Frequently	Frequently	Yes	27 Sep 20	34.1749		4	Not	Not	Not
936	4	Quillabamba	45	Fem	49	4	Not	Not	Not	Not	Not	Not			Not	Not	Not	Not	Not	Not	Not	Not	Not	Not	Not	Always	Always	Never	Never	Never	Always	Always	Not	20 Sep 20			5	Not	Not	Not
11	2	Periphery of Cusco	3.1	Fem	20	3	Not	Not	Not	Not	Not	Not	62	1.6	Not	Not	Not	Not	Not	Not	Not	Not	Not	Not	Not	Always	Always	Sometimes	Always	Sometimes	Always	Always	Not	14 Sep 20	24.2188	12a+	5	Not	Not	Not
481	1	Quillabamba	1030	Fem	39	2	Not	Not	Not	Not	Not	Not	95	1.55	Not	Not	Not	Not	Not	Not	Not	Not	Not	Not	Not	Always	Always	Never	Never	Never	Always	Always	Yes	19 Sep 20	39.5421	12a+	3	Not	Not	Not
283	2	Periphery of Cusco	1712	Fem	20	3	Not	Not	Not	Not	Not	Not	77.5	1.6	Not	Not	Not	Not	Not	Not	Not	Not	Not	Not	Not	Always	Always	Never	Never	Never	Frequently	Always	Not	19 Sep 20	30.2734	7-11a	4	Not	Yes	Yes
928	2	Quillabamba	37	Fem	67	2	Not	Not	Not	Not	Not	Not	50	1.52	Not	Not	Not	Not	Not	Not	Not	Not	Not	Not	Not	Always	Always	Never	Never	Never	Always	Always	Not	20 Sep 20	21.6413	7-11a	4	Not	Not	Not
124	2	Periphery of Cusco	9654	Masc	66	2	Not	Not	Not	Not	Not	Not	60	1.58	Not	Yes	Not	Not	Not	Not	Not	Not	Not	Not	Not	Always	Always		Frequently	Never	Always	Always	Not	14 Sep 20	24.0346	7-11a	4	Not	Yes	Yes
805	1	Periphery of Cusco	4424	Masc	54	2	Not	Not	Not	Not	Not	Not	80	1.68	Yes	Not	Not	Not	Not	Not	Not	Not	Not	Not	Not	Always	Always	Never	Frequently	Never	Always	Always	Yes	26 Sep 20	28.3447	12a+	5	Not	Not	Not
162	1	Quillabamba	6	Fem	51	4	Not	Not	Not	Not	Not	Not	60	1.55	Not	Yes	Yes	Not	Not	Not	Not	Not	Not	Not	Not	Frequently	Frequently	Sometimes	Never	Never	Always	Always	Not	14 Sep 20	24.974	12a+	4	Not	Not	Not
914	4	Quillabamba	23	Masc	62	5	Not	Not	Not	Not	Not	Not	68	1.62	Not	Not	Not	Not	Not	Not	Not	Not	Not	Not	Not	Always	Always	Never	Never	Never	Always	Always	Not	20 Sep 20	25.9107	12a+	5	Not	Not	Not
530	1	Cusco	45ANT09	Masc	52	1	Not	Not	Not	Not	Not	Not	65	1.62	Yes	Not	Not	Not	Not	Yes	Not	Not	Yes	Not	Not	Always	Always	Sometimes	Sometimes	Never	Always	Always	Yes	20 Sep 20	24.7676	7-11a	3	Not	Not	Not
249	3	Periphery of Cusco	77023	Fem	46	4	Not	Not	Not	Not	Not	Not	47	1.47	Not	Not	Not	Not	Not	Not	Not	Not	Not	Not	Not	Always	Always	Never	Never	Never	Always	Always	Not	19 Sep 20	21.7502	<7a	4	Not	Not	Not
605	3	Periphery of Cusco	29 - JR - 02	Fem	18	4	Not	Not	Not	Not		Not	67	1.54	Not	Not	Not	Not	Not	Not	Not	Not	Not	Not	Not	Always	Frequently	Sometimes	Frequently	Sometimes	Frequently	Always	Yes	27 Sep 20	28.251	12a+	5	Not	Not	Not
910	5	Quillabamba	19	Fem	46	5	Yes	Yes	Not	Not	Not	Not			Not	Not	Yes	Not	Not	Not	Not	Not	Yes	Not	Not	Always	Always	Never	Never	Never	Always	Always	Not	20 Sep 20		12a+	5	Not	Not	Yes
256	3	Periphery of Cusco	77064	Masc	20	5	Not	Not	Not	Not	Not	Not	87	1.72	Not	Not	Not	Not	Not	Not	Not	Not	Not	Not	Not	Always	Always	Never	Never	Never	Always	Always	Not	19 Sep 20	29.4078	7-11a	5	Not	Not	Not
920	2	Quillabamba	29	Masc	86	6	Yes	Not	Not	Not	Not	Not			Not	Not	Not	Not	Not	Not	Not	Not	Not	Yes	Not	Always	Always	Never	Never	Never	Always	Always	Not	20 Sep 20		7-11a	5	Not	Not	Not
927	2	Quillabamba	36	Masc	19	3	Not	Not	Not	Not	Not	Not	56	1.6	Not	Not	Not	Not	Not	Not	Not	Not	Not	Not	Not	Always	Always	Never	Never	Never	Always	Always	Not	20 Sep 20	21.875	12a+	3	Not	Not	Not
194	7	Quillabamba	Q194	Masc	21	8	Not	Not	Not	Not	Not	Not	55	1.8	Yes	Not	Not	Not	Yes	Not	Not	Not	Yes	Not	Not	Always	Always	Sometimes	Frequently	Never	Frequently	Always	Yes	14 Sep 20	16.9753	<7a	5	Not	Not	Not
301	3	Cusco	45ER26	Masc	20	3	Not	Not	Not	Not	Not	Not	60	1.6	Yes	Not	Not	Not	Not	Not	Not	Not	Yes	Not	Yes	Always	Always	Sometimes	Sometimes	Never	Always	Always	Not	20 Sep 20	23.4375	7-11a	3	Yes	Not	Not
703	1	Cusco	45NE17	Fem	67	4	Not	Not	Not	Not	Not	Not	65	1.53	Yes	Not	Not	Not	Not	Not	Yes	Not	Yes	Not	Not	Frequently	Frequently	Never	Sometimes	Never	Frequently	Frequently	Yes	27 Sep 20	27.7671	<7a	4	Not	Not	Not
320	2	Cusco	89	Fem	60	4	Yes	Not	Not	Not	Not	Not	67	1.55	Not	Yes	Yes	Not	Yes	Yes	Not	Not	Yes	Not	Not	Always	Always	Never	Sometimes	Never	Always	Always	Not	20 Sep 20	27.8876	7-11a	5	Not	Not	Yes
311	1	Cusco	45ER21	Fem	47	1	Not	Not	Not	Not	Not	Not	65	1.59	Not	Not	Yes	Not	Not	Not	Not	Not	Not	Not	Not	Always	Always	Never	Frequently	Never	Always	Always	Not	20 Sep 20	25.711	12a+	3	Yes	Not	Not
206	2	Quillabamba	Q206	Fem	27	2	Not	Not	Not	Not	Not	Not	82	1.56	Not	Not	Not	Not	Not	Not	Not	Not	Yes	Not	Not	Frequently	Always	Never	Sometimes	Sometimes	Always	Always	Not	14 Sep 20	33.6949	12a+	3	Not	Yes	Not
359	2	Cusco	452B18	Masc	26	2	Not	Not	Not	Not	Not	Not	70	1.71	Not	Not	Not	Not	Not	Not	Not	Not	Not	Not	Yes	Always	Always	Frequently		Never	Always	Always	Yes	26 Sep 20	23.939	12a+	3	Not	Yes	Yes
302	2	Cusco	45ER22	Fem	40	2	Not	Not	Not	Not	Not	Not	48	1.56	Yes	Not	Not	Not	Not	Not	Not	Not	Yes	Yes	Not	Always	Always		Sometimes	Sometimes	Frequently	Frequently	Not	20 Sep 20	19.7239	12a+	3	Not	Not	Not
331	3	Periphery of Cusco	2501B	Masc	45	3	Not	Not	Not	Not	Not	Not	85	1.7	Yes	Not	Not	Not	Not	Not	Not	Not	Not	Not	Not	Frequently	Always	Never	Frequently	Never	Always	Frequently	Yes	25 Sep 20	29.4118	7-11a	5	Not	Yes	Yes
80	2	Periphery of Cusco	453A	Fem	47	2	Not	Not	Not	Not	Not	Not	70	1.6	Not	Not	Yes	Not	Not	Not	Not	Not	Yes	Not	Not	Always	Always	Never	Always	Never	Always	Always	Not	14 Sep 20	27.3438	12a+	4	Not	Not	Not
278	2	Periphery of Cusco	1713B	Fem	66	4	Not	Not	Not	Not	Not	Not	65	1.6	Not	Not	Not	Not	Not	Not	Not	Not	Yes	Not	Not	Always	Always	Never	Never	Never	Always	Always	Yes	19 Sep 20	25.3906	<7a	5	Not	Not	Not
571	1	Periphery of Cusco	83081	Masc	45	2	Not	Not	Not	Not	Not	Not	80	1.69	Not	Not	Not	Not	Not	Not	Not	Not	Not	Not	Not	Frequently	Always		Always	Sometimes	Always	Always	Not	20 Sep 20	28.0102	12a+	4	Not	Not	Not
1	2	Periphery of Cusco	22223	Masc	35	2	Not	Not	Not	Not	Not	Not	79	1.68	Not	Not	Not	Not	Not	Not	Not	Not	Not	Not	Not	Always	Always	Never	Sometimes	Never	Frequently	Always	Not	14 Sep 20	27.9904	12a+	4	Not	Yes	Yes
149	1	Cusco	89K	Fem	34	1	Not	Not	Not	Not	Not	Not	73	1.64	Yes	Not	Not	Not	Not	Not	Not	Not	Yes	Not	Not	Always	Always	Sometimes	Always	Sometimes	Always	Always	Yes	14 Sep 20	27.1416	<7a	3	Not	Not	Not
383	2	Periphery of Cusco	25A04	Masc	41	2	Not	Not	Not	Not	Not	Not	85	1.7	Not	Yes	Not	Not	Not	Not	Not	Not	Yes	Not	Not	Always	Always		Always	Sometimes	Always	Always	Not	26 Sep 20	29.4118	7-11a	4	Not	Not	Not
295	2	Periphery of Cusco	-	Fem	55	2	Not	Not	Not	Not	Not	Not	63	1.45	Not	Not	Not	Not	Not	Not	Not	Not	Not	Not	Not	Always	Always			Sometimes	Always	Always	Yes	20 Sep 20	29.9643	7-11a	3	Not	Not	Not
536	1	Cusco	45ER1	Masc	44	4	Not	Not	Not	Not	Not	Not	77	1.69	Not	Not	Not	Not	Not	Not	Not	Not	Not	Not	Not	Always	Always	Never	Sometimes	Frequently	Frequently	Frequently	Not	20 Sep 20	26.9598	7-11a	5	Not	Not	Not
905	4	Quillabamba	14	Masc	85	5	Not	Not	Not	Not	Not	Not	60	1.6	Yes	Not	Not	Not	Not	Not	Not	Not	Not	Not	Not	Always	Always	Never	Never	Never	Always	Always	Not	20 Sep 20	23.4375	<7a	5	Not	Not	Not
253	1	Periphery of Cusco	62153	Fem	43	2	Not	Not	Not	Not	Not	Not	72	1.6	Yes	Not	Yes	Not	Yes	Yes	Yes	Not	Yes	Yes	Yes	Always	Always	Never	Frequently	Never	Always	Always	Yes	19 Sep 20	28.125	12a+	4	Not	Not	Not
147	1	Cusco	89-I	Masc	45	2	Not	Not	Not	Not	Not	Not	78	1.68	Not	Not	Not	Not	Not	Not	Not	Not	Not	Not	Not	Always	Always	Always	Always	Always	Always	Always	Not	14 Sep 20	27.6361	<7a	4	Not	Not	Not
741	1	Cusco	45JL13	Masc	32	2	Not	Not	Not	Not	Not	Not	72	1.65	Yes	Not	Not	Not	Not	Not	Not	Not	Yes	Not	Not	Always	Always	Frequently	Sometimes	Sometimes	Always	Always	Yes	27 Sep 20	26.4463	12a+	3	Not	Not	Not
372	1	Periphery of Cusco	25A17	Fem	26	2	Not	Not	Not	Not	Not	Not	60	1.63	Not	Yes	Not	Not	Not	Not	Not	Yes	Not	Not	Not	Always	Always	Never	Frequently	Sometimes	Frequently	Sometimes	Not	26 Sep 20	22.5827	7-11a	3	Not	Not	Not
413	1	Periphery of Cusco	53KG4	Fem	24	3	Not	Not	Not	Not	Not	Not	63	1.63	Not	Not	Not	Not	Not	Not	Not	Yes	Not	Not	Yes	Always	Always		Always		Always	Always	Yes	27 Sep 20	23.7118	12a+	3	Not	Not	Not
143	3	Cusco	89E	Fem	57	3	Not	Yes	Not	Not	Not	Not	77	1.56	Yes	Not	Not	Not	Yes	Not	Not	Not	Yes	Not	Not	Always	Always	Never	Always	Sometimes	Always	Always	Yes	14 Sep 20	31.6404	<7a	4	Not	Not	Not
169	1	Quillabamba	18	Masc		2	Not	Not	Not	Not	Not	Not	75	1.72	Not	Not	Not	Not	Not	Not	Not	Not	Not	Not	Not	Always	Always	Never	Never	Never	Always	Always	Not	14 Sep 20	25.3515	12a+	4	Not	Not	Not
526	1	Cusco	45ANT04	Masc	47	2	Not	Not	Not	Not	Not	Not	82	1.63	Not	Yes	Yes	Not	Not	Not	Not	Not	Not	Yes	Not	Frequently	Always	Never	Never	Never	Frequently	Frequently	Yes	20 Sep 20	30.863	12a+	5	Not	Not	Not
322	1	Cusco	89	Fem	28	2	Not	Not	Not	Not	Not	Not	60	1.5	Not	Not	Not	Not	Not	Not	Not	Not	Not	Not	Not	Always	Always	Never	Always	Always	Always	Sometimes	Not	20 Sep 20	26.6667	<7a	3	Not	Not	Not
156	2	Cusco	89R	Fem	40	2	Not	Not	Not	Not	Not	Not	65	1.58	Not	Not	Not	Not	Not	Not	Not	Not	Not	Not	Not	Always	Always	Never	Always	Never	Always	Always	Yes	14 Sep 20	26.0375	<7a	3	Not	Not	Not
53	2	Periphery of Cusco	4453	Fem	63	4	Not	Not	Not	Not	Not	Not	75	1.58	Not	Yes	Not	Not	Yes	Yes	Not	Yes	Not	Not	Not	Always	Always	Never	Sometimes	Sometimes	Always	Always	Not	14 Sep 20	30.0433	7-11a	4	Not	Yes	Yes
911	1	Quillabamba	20	Fem	39	3	Not	Not	Not	Not	Not	Not			Not	Not	Not	Not	Not	Not	Not	Not	Not	Not	Not	Always	Always	Never	Never	Never	Always	Always	Not	20 Sep 20		7-11a	4	Not	Not	Not
152	1	Cusco	89N	Fem	36	1	Not	Not	Not	Not	Not	Not	62	1.5	Not	Not	Not	Not	Not	Not	Not	Not	Not	Not	Not	Always	Always	Never	Always	Never	Always	Always	Not	14 Sep 20	27.5556	<7a	3	Not	Not	Not
802	3	Periphery of Cusco	44021	Fem	49	3	Not	Not	Not	Not	Not	Not	49	1.5	Not	Not	Not	Not	Not	Not	Not	Not	Not	Not	Not	Always	Always		Always	Never	Always	Always	Not	26 Sep 20	21.7778	12a+	3	Not	Not	Not
194	4	Quillabamba	Q194	Masc	21	8	Not	Not	Not	Not	Not	Not	80	1.75	Not	Not	Not	Not	Not	Not	Not	Not	Not	Not	Not	Always	Always	Sometimes	Never	Never	Always	Always	Not	14 Sep 20	26.1225	12a+	5	Not	Not	Not
407	1	Periphery of Cusco	50ME07	Masc	40	2	Not	Not	Not	Not	Not	Not	89	1.74	Yes	Not	Not	Not	Not	Not	Not	Not	Not	Not	Not	Always	Always	Never	Always	Never	Always	Always	Not	27 Sep 20	29.3962	12a+	3	Not	Not	Not
269	1	Periphery of Cusco	66041	Fem	32	1	Not	Not	Not	Not	Not	Not	70	1.55	Not	Not	Not	Not	Not	Not	Not	Not	Yes	Not	Not	Frequently	Always	Frequently	Sometimes	Never	Always	Always	Not	19 Sep 20	29.1363	12a+	3	Not	Not	Not
118	1	Periphery of Cusco	4421	Fem	44	1	Not	Not	Not	Not	Not	Not	64	1.5	Not	Yes	Not	Not	Not	Not	Not	Not	Yes	Not	Not	Always	Always	Sometimes	Sometimes	Never	Always	Always	Not	14 Sep 20	28.4444	12a+	4	Not	Not	Not
43	3	Cusco	1143A	Masc	62	3	Not	Not	Not	Not	Not	Not	57	1.67	Not	Not	Not	Not	Not	Not	Not	Not	Not	Not	Not	Always	Always	Frequently	Always	Sometimes	Always	Always	Not	14 Sep 20	20.4382	12a+	4	Not	Not	Yes
745	1	Cusco	45JL05	Masc	36	2	Not	Not	Not	Not	Not	Not	69	1.68	Not	Not	Not	Not	Not	Yes	Not	Not	Not	Not	Not	Always	Always	Never	Frequently	Never	Always	Always	Not	27 Sep 20	24.4473	7-11a	5	Not	Not	Not
463	1	Quillabamba	1013	Fem	33	2	Not	Not	Not	Not	Not	Not	70	1.65	Not	Not	Not	Not	Not	Not	Not	Not	Not	Not	Not	Always	Always	Never	Never	Never	Always	Always	Not	19 Sep 20	25.7117	12a+	3	Not	Yes	Not
713	2	Periphery of Cusco	45ME01	Masc	19	3	Not	Not	Not	Not	Not	Not	78	1.73	Yes	Not	Not	Not	Yes	Yes	Yes	Not	Yes	Not	Not	Frequently	Frequently	Never	Never	Never	Frequently	Frequently	Yes	27 Sep 20	26.0617	12a+	4	Not	Not	Not
537	1	Cusco	45ER2	Fem	48	4	Not	Not	Not	Not	Not	Not	69	1.57	Not	Not	Not	Not	Not	Not	Not	Not	Not	Not	Not	Always	Always	Never	Always	Never	Always	Always	Yes	20 Sep 20	27.993	12a+	5	Not	Not	Not
273	1	Periphery of Cusco	77054	Fem	38	1	Not	Not	Not	Not	Not	Not	70	1.55	Not	Not	Not	Not	Not	Not	Not	Not	Yes	Not	Not	Frequently	Always	Never	Sometimes	Never	Always	Always	Not	19 Sep 20	29.1363	7-11a	5	Not	Not	Not
6	1	Periphery of Cusco	22233	Fem	24	2	Not	Not	Not	Not	Not	Not	50	1.48	Not	Not	Not	Not	Not	Not	Not	Not	Not	Not	Not	Frequently	Always	Never	Always	Never	Always	Always	Not	14 Sep 20	22.8269	7-11a	4	Not	Not	Not
63	1	Periphery of Cusco	22.1A	Fem	46	1	Not	Not	Not	Not	Not	Not	87	1.64	Not	Not	Not	Not	Not	Not	Not	Not	Not	Not	Not	Always	Always		Frequently		Frequently	Always	Yes	14 Sep 20	32.3468	<7a	4	Not	Not	Not
385	4	Periphery of Cusco	25A06	Fem	27	4	Not	Not	Not	Not	Not	Not	75	1.65	Yes	Yes	Yes	Not	Yes	Yes	Yes	Yes	Yes	Yes	Yes	Always	Always	Never	Frequently	Never	Always	Always	Yes	26 Sep 20	27.5482	12a+	5	Not	Not	Not
127	4	Periphery of Cusco	6351	Masc	23	4	Not	Not	Not	Not	Not	Not	75	1.78	Not	Not	Not	Not	Not	Not	Not	Not	Not	Not	Not	Always	Always	Always	Sometimes	Sometimes	Always		Not	14 Sep 20	23.6713	12a+	4	Not	Yes	Yes
48	3	Cusco	2023	Fem	18	3	Not	Not	Not	Not	Not	Not	42	1.35	Not	Not	Not	Not	Not	Not	Not	Not	Not	Not	Not	Frequently	Always	Never	Sometimes	Never	Always	Frequently	Not	14 Sep 20	23.0453	7-11a	3	Not	Not	Not
121	3	Periphery of Cusco	4423	Masc	67	3	Not	Not	Not	Not	Not	Not	50	1.62	Not	Not	Not	Not	Not	Not	Not	Not	Not	Not	Not	Always	Always	Never	Sometimes	Never	Never	Always	Not	14 Sep 20	19.052	7-11a	5	Not	Not	Not
312	2	Cusco	45ER22	Fem	52	4	Not	Not	Not	Not	Not	Not	74	1.6	Yes	Yes	Yes	Not	Not	Not	Not	Not	Not	Not	Not	Always	Always	Sometimes	Sometimes	Never	Always	Always	Not	20 Sep 20	28.9062	12a+	4	Not	Yes	Yes
502	2	Cusco	21.1.A	Fem	20	3	Not	Not	Not	Not		Not	50	1.55	Not	Not	Not	Not	Not	Not	Not	Not	Yes	Not	Not	Always	Always	Never	Frequently	Never	Always	Frequently	Not	20 Sep 20	20.8117	7-11a	3	Not	Yes	Not
60	1	Periphery of Cusco	22.1	Fem	62	2	Not	Yes	Not	Not	Not	Not	72	1.7	Yes	Yes	Not	Yes	Yes	Not	Yes	Yes	Yes	Not	Not	Always	Always		Sometimes		Always	Always	Yes	14 Sep 20	24.9135	12a+	3	Not	Not	Not
464	1	Quillabamba	1014	Fem	31	1	Not	Not	Not	Not	Not	Not	80	1.5	Not	Not	Not	Not	Not	Not	Not	Not	Not	Not	Not	Always	Always	Never	Never	Never	Always	Always	Not	19 Sep 20	35.5556	7-11a	3	Not	Not	Not
223	1	Periphery of Cusco	223-N-1.10	Masc	64	4	Not	Not	Not	Not	Not	Not	75	1.73	Not	Not	Not	Not	Not	Yes	Not	Not	Not	Not	Not	Always	Always	Always	Always	Sometimes	Always	Always	Yes	18 Sep 20	25.0593	12a+	4	Not	Yes	Yes
732	5	Cusco	45JL01	Masc		5	Not	Not	Not	Not	Not	Not	75	1.7	Not	Not	Not	Not	Yes	Not	Not	Yes	Yes	Not	Not	Always		Frequently	Frequently	Sometimes	Always	Always	Yes	27 Sep 20	25.9516	12a+	4	Not	Not	Not
200	3	Quillabamba	Q200	Masc	19	5	Not	Not	Not	Not		Not	78	1.77	Not	Not	Not	Not	Not	Not	Not	Not	Not	Not	Not	Always	Always	Never	Never	Sometimes	Always	Always	Not	14 Sep 20	24.8971	12a+	5	Not	Not	Not
190	1	Quillabamba	-	Fem	31	2	Not	Not	Not	Not	Not	Not	73	1.65	Not	Not	Not	Not	Not	Not	Not	Not	Not	Not	Not	Frequently	Always	Never	Always	Never	Always	Always	Yes	14 Sep 20	26.8136	7-11a	4	Not	Yes	Not
603	3	Periphery of Cusco	53-DR-28	Masc	38	4	Not	Not	Not	Not	Not	Not	107	1.75	Not	Not	Not	Not	Not	Not	Not	Not	Yes	Yes	Not	Always	Always	Sometimes	Never	Never	Always	Always	Yes	27 Sep 20	34.9388	12a+	5	Yes	Yes	Yes
97	1	Periphery of Cusco	22273	Masc	55	2	Not	Yes	Not	Not	Not	Not	71	1.72	Not	Not	Not	Not	Not	Not	Not	Not	Not	Not	Not	Frequently	Frequently	Never	Sometimes	Never	Frequently	Frequently	Yes	14 Sep 20	23.9995	12a+	3	Not	Yes	Not
405	1	Periphery of Cusco	50ME06	Fem	32	2	Not	Not	Not	Not	Not	Not	85	1.55	Yes	Not	Not	Not	Yes	Not	Not	Not	Not	Yes	Yes	Frequently	Frequently	Never	Sometimes	Never	Frequently	Frequently	Yes	27 Sep 20	35.3798	7-11a	5	Not	Yes	Yes
514	4	Cusco	514.1.10	Fem		4	Not	Not	Not	Not	Not	Not	68	1.5	Not	Not	Yes	Not	Not	Not	Not	Not	Not	Yes	Not	Always	Always	Never	Always	Sometimes	Always	Always	Not	20 Sep 20	30.2222	12a+	4	Not	Yes	Not
558	1	Cusco	558.1.10	Masc	54	3	Not	Not	Not	Not		Not	75	1.7	Not	Not	Not	Not	Not	Yes	Not	Yes	Not	Not	Not	Always	Always	Sometimes	Frequently	Never	Always	Always	Yes	20 Sep 20	25.9516	12a+	4	Not	Not	Not
713	3	Periphery of Cusco	45ME01	Fem	55	3	Not	Not	Not	Not	Not	Not	82	1.5	Not	Yes	Yes	Not	Not	Not	Not	Yes	Yes	Not	Not	Frequently	Sometimes	Never	Frequently	Never	Frequently	Frequently	Yes	27 Sep 20	36.4444	7-11a	4	Not	Not	Not
717	2	Periphery of Cusco	45ME07	Fem	22	2	Not	Not	Not	Not	Not	Not	85	1.7	Not	Not	Not	Not	Yes	Not	Not	Not	Yes	Not	Not	Frequently	Frequently	Frequently	Always	Frequently	Frequently	Frequently	Yes	27 Sep 20	29.4118	7-11a	5	Not	Yes	Yes
324	1	Cusco	-	Fem	22	2	Yes	Not	Not	Not	Not	Not	60	1.52	Not	Not	Not	Not	Not	Not	Not	Yes	Not	Not	Not	Frequently	Always	Frequently	Sometimes	Never	Always	Always	Yes	20 Sep 20	25.9695	12a+	3	Not	Not	Yes
722	1	Periphery of Cusco	45ME12B	Fem	31	1	Not	Not	Not	Not	Not	Not	50	1.5	Not	Not	Not	Not	Not	Not	Not	Not	Not	Not	Not	Sometimes	Always	Never	Always	Sometimes	Always	Always	Not	27 Sep 20	22.2222	12a+	4	Not	Not	Not
360	1	Cusco	452B19	Masc	64	3	Not	Not	Not	Not	Not	Yes	78	1.67	Not	Not	Yes	Yes	Not	Not	Not	Not	Not	Not	Not	Always	Always	Sometimes	Never	Never	Always	Always	Yes	26 Sep 20	27.968	12a+	5
447	3	Quillabamba	5	Masc	31	5	Not	Not	Not	Not	Not	Not	64	1.7	Not	Not	Not	Not	Not	Not	Yes	Yes	Not	Not	Not	Always	Always	Never	Never	Never	Always	Always	Not	20 Sep 20	22.1453	12a+	3	Not	Not	Not
941	5	Quillabamba	51	Masc	90	5	Not	Not	Not	Not	Not	Not	79	1.61	Not	Not	Not	Not	Not	Not	Not	Not	Not	Not	Not	Always	Always	Never	Never	Never	Always	Always	Not	20 Sep 20	30.4772	<7a	5	Not	Not	Not
278	3	Periphery of Cusco	1713B	Masc	71	4	Not	Not	Not	Not	Not	Not	59	1.65	Not	Not	Not	Not	Not	Not	Not	Not	Yes	Not	Not	Always	Always	Sometimes	Sometimes	Never	Always	Always	Not	19 Sep 20	21.6713	12a+	5	Not	Not	Not
610	1	Periphery of Cusco	25-A21	Fem	31	2	Not	Not	Not	Not	Not	Not	65	1.55	Not	Yes	Not	Not	Not	Not	Not	Not	Not	Not	Not	Always	Always	Frequently	Frequently	Sometimes	Frequently	Always	Not	26 Sep 20	27.0552	12a+	3	Not	Not	Not
143	2	Cusco	89E	Fem	23	3	Not	Not	Not	Not	Not	Not	69	1.57	Not	Not	Not	Not	Not	Not	Not	Not	Not	Not	Not	Always	Always	Never	Always	Sometimes	Always	Always	Not	14 Sep 20	27.993	12a+	4	Not	Not	Not
140	2	Cusco	89B	Fem	38	3	Not	Not	Not	Not	Not	Not	48	1.5	Not	Not	Not	Not	Not	Not	Not	Not	Yes	Not	Not	Always	Always		Always	Never	Always	Frequently	Yes	14 Sep 20	21.3333	7-11a	5	Not	Not
138	1	Cusco	3172	Fem	60	2	Not	Not	Not	Not	Not	Not	70	1.76	Yes	Not	Not	Not	Not	Not	Not	Yes	Not	Not	Not	Frequently	Always	Frequently	Never	Sometimes	Frequently	Always	Yes	14 Sep 20	22.5981	12a+	3	Yes	Not	Not
200	2	Quillabamba	Q200	Masc	25	5	Not	Not	Not	Not		Not	58	1.57	Not	Not	Not	Not	Not	Not	Not	Not	Not	Not	Not	Always	Always	Sometimes	Never	Never	Always	Always	Not	14 Sep 20	23.5304	12a+	5	Not	Not	Not
36	2	Periphery of Cusco	3883	Fem	64	2	Not	Not	Not	Not	Not	Not	90	1.52	Yes	Not	Not	Not	Not	Yes	Not	Not	Yes	Not	Not	Frequently	Always	Never	Frequently	Never	Always	Always	Not	14 Sep 20	38.9543	<7a	3	Not	Not	Not
349	1	Periphery of Cusco	29051	Fem	35	1	Not	Not	Not	Not	Not	Not	64	1.65	Yes	Not	Not	Not	Not	Not	Not	Not	Not	Not	Not	Always	Always	Frequently	Sometimes	Never	Always	Always	Not	26 Sep 20	23.5078	12a+	3	Not	Not	Not
320	3	Cusco	89	Masc	23	4	Not	Not	Not	Not	Not	Not	63	1.63	Not	Yes	Yes	Not	Yes	Yes	Not	Yes	Yes	Not	Not	Frequently	Frequently	Never	Frequently	Sometimes	Always	Always	Not	20 Sep 20	23.7118	7-11a	5	Not	Not	Yes
383	1	Periphery of Cusco	25A04	Fem	42	2	Not	Not	Not	Not	Not	Not	78	1.65	Not	Yes	Yes	Yes	Not	Not	Not	Not	Not	Not	Yes	Sometimes	Always		Frequently	Sometimes	Always	Always	Not	26 Sep 20	28.6501	7-11a	4	Not	Not	Not
482	3	Quillabamba	1031	Masc	73	3	Not	Not	Not	Not	Not	Not	66	1.7	Not	Not	Not	Not	Not	Not	Not	Not	Yes	Not	Not	Always	Always	Never	Never	Never	Always	Always	Not	19 Sep 20	22.8374	<7a	3	Not	Not	Not
203	2	Quillabamba	Q203	Masc	20	4	Not	Not	Not	Not	Not	Not	85	1.72	Not	Not	Not	Not	Not	Not	Not	Not	Not	Not	Not	Always	Always	Sometimes	Sometimes	Never	Always	Always	Not	14 Sep 20	28.7318	12a+	4	Not	Not	Not
462	1	Quillabamba	1012	Fem	60	1	Not	Not	Not	Not	Not	Not			Not	Not	Not	Not	Not	Not	Not	Not	Not	Not	Not	Always	Always	Never	Never	Never	Always	Never	Not	19 Sep 20		7-11a	4	Not	Not	Not
55	1	Periphery of Cusco	4463B	Masc	54	4	Not	Yes	Not	Not	Not	Not	60	1.58	Not	Not	Not	Not	Not	Yes	Not	Not	Yes	Not	Yes	Always	Always	Always	Always	Never	Always	Always	Yes	14 Sep 20	24.0346	12a+	5	Not	Yes	Yes
19	1	Periphery of Cusco	55	Fem	44	1	Not	Not	Not	Not	Not	Not	60	1.43	Yes	Yes	Not	Not	Yes	Not	Not	Not	Not	Not	Not	Always	Always		Frequently		Frequently	Always	Not	14 Sep 20	29.3413	7-11a	4	Not	Not	Not
940	1	Quillabamba	50	Masc	77	4	Yes	Not	Not	Not	Not	Not	82	1.68	Yes	Not	Not	Not	Yes	Not	Not	Not	Yes	Not	Not	Always	Always	Never	Never	Never	Always	Always	Not	20 Sep 20	29.0533	12a+	4	Not	Not	Not
547	1	Cusco	45ER10	Fem	20	3	Not	Not	Not	Not	Not	Not	50	1.5	Not	Not	Not	Not	Not	Not	Not	Not	Not	Not	Not	Always	Always	Never	Sometimes	Never	Always	Always	Not	20 Sep 20	22.2222	12a+	3	Not	Not	Yes
734	1	Cusco	45JL06	Masc	80	4	Not	Not	Not	Not	Yes	Not			Yes	Not	Yes	Not	Not	Not	Not	Not	Not	Not	Not	Always	Always	Never	Sometimes	Never	Always	Always	Not	27 Sep 20		<7a	5	Not	Not	Not
259	1	Periphery of Cusco	1721	Fem	68	4	Yes	Not	Not	Not	Not	Not	78	1.56	Not	Not	Yes	Not	Not	Not	Not	Not	Yes	Not	Not	Always	Always	Always	Sometimes	Never	Always	Always	Not	19 Sep 20	32.0513	7-11a	4	Not	Not	Not
110	3	Periphery of Cusco	3812	Masc	23	5	Not	Not	Not	Not	Not	Not	70	1.66	Yes	Not	Not	Not	Not	Not	Yes	Yes	Not	Not	Not	Always	Always	Always	Sometimes	Sometimes	Frequently	Always	Not	14 Sep 20	25.4028	12a+	5	Not	Not	Not
572	3	Periphery of Cusco	83033	Masc	33	4	Not	Not	Not	Not	Not	Not	70	1.76	Yes	Not	Yes	Yes	Not	Not	Not	Not	Yes	Not	Not	Always	Always			Never	Always	Always	Yes	20 Sep 20	22.5981	12a+	4	Not	Not	Not
603	2	Periphery of Cusco	53-DR-28	Fem	62	4	Not	Yes	Not	Not	Not	Not			Not	Not	Not	Not	Not	Not	Not	Not	Yes	Not	Not	Always	Always	Sometimes	Sometimes	Never	Always	Always	Yes	27 Sep 20		12a+	5	Yes	Yes	Yes
504	1	Cusco	21ROC04	Masc	34	1	Not	Not	Not	Not	Not	Not	64	1.61	Not	Not	Not	Not	Not	Not	Not	Not	Not	Not	Not	Always	Always	Frequently	Sometimes	Never	Always	Always	Not	20 Sep 20	24.6904	12a+	4	Not	Yes	Not
87	1	Periphery of Cusco	411E	Masc	24	2	Not	Not	Not	Not	Not	Not	62		Not	Not	Not	Not	Not	Not	Not	Not	Not	Not	Not	Sometimes	Frequently	Frequently	Sometimes	Never	Sometimes	Frequently	Yes	14 Sep 20		12a+	3	Not	Not	Not
300	1	Cusco	45ER25	Fem	22	1	Not	Not	Not	Not	Not	Not	56	1.52	Not	Not	Not	Yes	Not	Not	Not	Not	Not	Not	Not	Always	Always	Never	Frequently	Never	Always		Yes	20 Sep 20	24.2382	12a+	4	Not	Not	Not
742	3	Cusco	45JL16	Masc	53	3	Not	Not	Not	Not	Yes	Not	78	1.69	Not	Yes	Not	Not	Not	Not	Yes	Not	Not	Not	Not	Always	Always	Always	Always	Always	Always	Always	Not	27 Sep 20	27.31	12a+	3	Not	Not	Not
359	1	Cusco	452B18	Fem	50	2	Not	Not	Not	Not	Not	Not	50	1.5	Not	Yes	Yes	Not	Not	Not	Not	Not	Yes	Not	Not	Always	Always	Sometimes	Always	Never	Always	Always	Not	26 Sep 20	22.2222	12a+	3	Not	Yes	Yes
56	4	Cusco	1142B	Fem	45	4	Not	Not	Not	Not	Not	Not	64	1.55	Not	Not	Not	Not	Not	Not	Not	Not	Not	Not	Not	Always	Always	Never	Always	Sometimes	Always	Always	Not	14 Sep 20	26.6389	12a+	5	Not	Yes	Yes
111	2	Periphery of Cusco	3823	Masc	53	3	Not	Not	Not	Not	Not	Not	76	1.67	Yes	Not	Yes	Not	Not	Yes	Not	Not	Not	Yes	Not	Always	Always				Always	Always	Not	14 Sep 20	27.2509	12a+	4	Not	Yes	Yes
342	2	Periphery of Cusco	2509	Fem	47	3	Not	Not	Not	Not	Not	Not	68	1.5	Not	Not	Not	Not	Not	Not	Not	Not	Not	Not	Not	Always	Frequently	Never	Sometimes	Never	Frequently	Frequently	Not	25 Sep 20	30.2222	<7a	5	Not	Not	Not
415	2	Periphery of Cusco	53KG5	Fem	21	2	Not	Not	Not	Not	Not	Not	60	1.6	Not	Not	Not	Yes	Not	Not	Not	Not	Yes	Yes	Not	Always	Always	Always	Frequently	Sometimes	Always	Always	Not	27 Sep 20	23.4375	12a+	3	Not	Not	Not
525	4	Cusco	45 ANT 05	Fem	33	5	Not	Not	Not	Not	Not	Not	45	1.52	Not	Not	Not	Not	Not	Not	Not	Not	Yes	Yes	Not	Always	Always	Always	Always	Never	Always	Always	Yes	20 Sep 20	19.4772	12a+	5	Not	Not	Not
104	1	Cusco	3171	Masc	42	2	Not	Not	Not	Not	Not	Not	90	1.76	Not	Not	Not	Not	Yes	Not	Not	Not	Yes	Not	Not	Always	Always	Always	Always	Never	Always	Always	Not	14 Sep 20	29.0547	12a+	4	Not	Not	Not
512	1	Cusco	21k001	Masc	63	1	Not	Not	Not	Not	Not	Not	68	1.64	Not	Yes	Yes	Yes	Yes	Yes	Not	Yes	Yes	Yes	Yes	Always	Always	Frequently	Frequently	Never	Frequently	Always	Yes	20 Sep 20	25.2826	12a+	5	Not	Yes	Yes
232	2	Periphery of Cusco	8383	Fem	20	2	Not	Not	Not	Not	Not	Not	76	1.62	Not	Not	Not	Not	Not	Not	Not	Not	Not	Not	Not	Frequently	Always	Never	Always	Never	Always	Always	Not	18 Sep 20	28.959	7-11a	4	Not	Not	Not
605	2	Periphery of Cusco	29 - JR - 02	Fem	50	4	Not	Not	Not	Not	Not	Not	63	1.5	Not	Yes	Not	Not	Not	Not	Not	Not	Yes	Not	Not	Always	Always	Never	Frequently	Never	Always	Always	Yes	27 Sep 20	28	7-11a	5	Not	Not	Not
270	2	Periphery of Cusco	62031	Fem	48	3	Not	Not	Not	Not	Not	Not	67	1.55	Yes	Not	Not	Not	Not	Not	Not	Not	Yes	Not	Not	Always	Always	Never	Sometimes	Always	Always	Always	Yes	19 Sep 20	27.8876	7-11a	5	Not	Yes	Yes
56	3	Cusco	1142B	Masc	71	4	Not	Yes	Not	Not	Not	Yes	96	1.73	Yes	Not	Not	Not	Not	Not	Not	Not	Not	Not	Not	Frequently	Always	Never	Always	Never	Always	Always	Not	14 Sep 20	32.0759	7-11a	5	Not	Yes	Yes
732	3	Cusco	45JL01	Masc	24	5	Not	Not	Yes	Not	Not	Not	58	1.65	Not	Not	Not	Not	Yes	Not	Not	Not	Not	Not	Not	Never	Never		Never		Never		Yes	27 Sep 20	21.304	12a+	4	Not	Not	Not
819	1	Cusco	45kg02	Fem	49	3	Not	Not	Not	Not	Not	Not	63	1.5	Not	Not	Not	Not	Not	Not	Not	Not	Not	Not	Not	Always	Always	Never	Sometimes	Sometimes		Always	Not	27 Sep 20	28	7-11a	4	Not	Not	Not
625	1	Periphery of Cusco	25A36	Masc	66	2	Not	Not	Not	Not	Not	Not	87	1.65	Yes	Not	Not	Not	Not	Not	Yes	Not	Not	Not	Not	Frequently	Frequently	Never	Sometimes	Never	Frequently	Frequently	Yes	26 Sep 20	31.9559	7-11a	3	Not	Not	Not
291	2	Cusco	2113	Fem	27	2	Not	Not	Not	Not	Not	Not	58	1.65	Yes	Not	Not	Not	Not	Not	Not	Not	Not	Not	Not		Always	Never	Frequently	Never	Always	Frequently	Not	20 Sep 20	21.304	12a+	5	Not	Not	Not
110	1	Periphery of Cusco	3812	Masc	72	5	Yes	Not	Not	Not	Not	Not	60	1.65	Not	Not	Not	Not	Not	Not	Not	Not	Not	Not	Not	Always	Always	Never	Sometimes	Never	Always	Always	Not	14 Sep 20	22.0386	12a+	5	Not	Not	Not
933	2	Quillabamba	42	Fem	32	2	Not	Not	Not	Not	Not	Not			Not	Not	Not	Not	Not	Not	Not	Not	Not	Not	Not	Always	Always	Never	Never	Never	Always	Always	Not	20 Sep 20		7-11a	4	Not	Not	Not
905	2	Quillabamba	14	Fem	84	5	Not	Not	Not	Not	Not	Not	63	1.5	Not	Not	Yes	Not	Yes	Yes	Not	Not	Yes	Not	Not	Always	Always	Never	Never	Never	Always	Always	Not	20 Sep 20	28	<7a	5	Not	Not	Not
62	2	Periphery of Cusco	221	Fem	51	5	Not	Not	Not	Not	Not	Not	75	1.55	Not	Not	Yes	Yes	Not	Not	Yes	Not	Not	Not	Not		Frequently	Frequently	Sometimes		Always	Always	Not	14 Sep 20	31.2175	12a+	5	Yes	Not	Not
71	3	Periphery of Cusco	414D	Fem	19	3	Not	Not	Not	Not	Not	Not	44	1.52	Not	Not	Not	Not	Not	Not	Not	Not	Not	Not	Not	Sometimes	Frequently	Never	Never	Never	Always	Always	Not	14 Sep 20	19.0443	12a+	3	Not	Not	Not
746	2	Cusco	45JL03	Fem	62	3	Yes	Not	Not	Yes	Not	Not	75	1.41	Not	Not	Yes	Not	Yes	Not	Not	Not	Yes	Yes	Not	Always	Always	Frequently	Sometimes	Never	Always	Always	Not	27 Sep 20	37.7245	<7a	5	Not	Not	Not
825	2	Cusco	45kg9	Fem	37	5	Not	Not	Not	Not	Not	Not	75	1.58	Yes	Yes	Yes	Yes	Not	Yes	Yes	Yes	Yes	Yes	Yes	Always	Always	Never	Sometimes	Never	Always	Always	Yes	27 Sep 20	30.0433	7-11a	3	Not	Not	Yes
513	3	Cusco	513.1.10	Fem	32	5	Not	Not	Not	Not	Not	Not	78	1.55	Not	Not	Not	Not	Not	Not	Not	Not	Yes	Yes	Not	Always	Always	Never	Always	Never	Always	Always	Not	20 Sep 20	32.4662	<7a	8	Not	Not	Yes
519	6	Cusco	_	Fem	60	6	Not	Not	Not	Not	Not	Not	80	1.6	Not	Not	Not	Not	Not	Not	Not	Not	Yes	Not	Yes	Always	Always	Always	Always		Always	Always	Not	20 Sep 20	31.25	12a+	8	Yes	Yes	Not
606	3	Periphery of Cusco	29-JR-03	Masc	27	6	Not	Not	Not	Not	Not	Not	85	1.69	Not	Not	Not	Not	Not	Not	Not	Not	Not	Not	Not	Frequently	Always	Sometimes	Sometimes	Never	Always	Frequently	Not	27 Sep 20	29.7609	12a+	10	Not	Not	Not
83	1	Periphery of Cusco	411A	Fem	60	6	Not	Not	Not	Not	Not	Not	61	1.58	Not	Not	Not	Not	Not	Not	Not	Not	Not	Not	Not	Always	Always	Never	Sometimes	Never	Always	Always	Not	14 Sep 20	24.4352	7-11a	8	Not	Not	Yes
569	2	Periphery of Cusco	5261	Fem	35	5	Not	Not	Not	Not	Not	Not	68	1.51	Not	Yes	Yes	Not	Yes	Yes	Not	Yes	Yes	Not	Yes	Always	Always	Never	Sometimes	Never	Always	Always	Yes	20 Sep 20	29.8233	7-11a	7	Not	Not	Yes
1016 - 436	3	Quillabamba	N6	Masc	35	6	Not	Not	Not	Not	Not	Not	60	1.6	Not	Not	Not	Not	Not	Not	Not	Not	Not	Not	Not	Frequently	Frequently	Never	Never	Never	Frequently	Always	Not	14 Sep 20	23.4375	12a+	8	Not	Not	Not
730	5	Cusco	45DR18	Masc	34	6	Not	Not	Not	Not	Not	Not	64	1.7	Not	Not	Not	Not	Not	Yes	Not	Not	Not	Not	Not	Always	Always	Never	Frequently	Sometimes	Always	Always	Yes	27 Sep 20	22.1453	12a+	7	Not	Yes	Yes
350	5	Periphery of Cusco	29033	Masc	60	7	Not	Yes	Not	Not	Not	Not	80	1.72	Not	Not	Yes	Not	Not	Not	Not	Yes	Yes	Not	Not	Frequently	Always	Always	Always	Never	Always	Always	Not	26 Sep 20	27.0417	12a+	8	Not	Not	Not
154	2	Cusco	89P	Fem	25	8	Not	Not	Not	Not	Not	Not	60	1.5	Not	Not	Not	Not	Not	Not	Not	Not	Not	Not	Not	Always	Always	Sometimes	Always	Sometimes	Always	Always	Yes	14 Sep 20	26.6667	<7a	9	Not	Not	Not
299	2	Cusco	45ER23	Fem	36	5	Not	Not	Not	Not	Not	Not	62	1.5	Yes	Not	Not	Not	Not	Not	Not	Not	Not	Not	Not	Always	Always	Sometimes	Sometimes	Never	Always	Always	Yes	20 Sep 20	27.5556	12a+	8	Not	Yes	Yes
58	3	Periphery of Cusco	9622	Masc	47	4	Not	Not	Not	Not	Not	Not	93	1.62	Not	Not	Not	Not	Not	Yes	Not	Not	Not	Not	Not	Frequently	Always	Sometimes	Sometimes	Never	Always	Frequently	Yes	14 Sep 20	35.4367	7-11a	6	Not	Not	Not
133	5	Cusco	3114			5	Not	Not	Not	Not	Not	Not	77	1.7	Not	Not	Not	Not	Not	Not	Not	Not	Not	Not	Not	Always	Always	Always	Always	Never	Always	Always	Not	14 Sep 20	26.6436	12a+	10	Not	Yes	Yes
34	6	Periphery of Cusco	3881	Fem		6	Not	Not	Not	Not	Not	Not	78	1.61	Yes	Yes	Not	Not	Yes	Not	Yes	Not	Yes	Not	Not	Always	Always	Frequently	Frequently	Frequently	Always	Always	Not	14 Sep 20	30.0914	12a+	9	Not	Not	Not
5	4	Periphery of Cusco	22222	Masc	26	5	Not	Not	Not	Not	Not	Not		1.77	Not	Not	Not	Not	Not	Not	Not	Not	Not	Not	Yes	Frequently	Always	Never	Sometimes	Never	Always	Frequently	Yes	14 Sep 20		12a+	6	Yes	Yes	Not
395	6	Cusco	89	Fem	26	9	Not	Not	Not	Not	Not	Not	57	1.57	Not	Not	Not	Not	Not	Not	Not	Not	Yes	Not	Not	Frequently	Frequently	Sometimes	Sometimes	Sometimes	Always	Always	Not	27 Sep 20	23.1247	12a+	6	Not	Not	Not
506	2	Cusco	21roc02	Fem	30	3	Not	Not	Not	Not	Not	Not	70	1.52	Not	Not	Not	Not	Not	Not	Not	Not	Yes	Not	Not	Always	Always	Sometimes	Always	Never	Always	Always	Not	20 Sep 20	30.2978	12a+	6	Not	Not	Not
1014- 433	2	Quillabamba	N2	Masc	74	5	Not	Not	Not	Not	Not	Not	84	1.53	Not	Not	Not	Not	Not	Not	Not	Not	Not	Not	Not	Frequently	Frequently	Never	Never	Never	Frequently	Always	Yes	14 Sep 20	35.8836		7	Not	Yes	Not
264	1	Periphery of Cusco	66061	Masc	75	4	Not	Not	Not	Not	Yes	Not	90	1.65	Not	Not	Not	Not	Not	Not	Not	Not	Not	Yes	Not	Always	Always	Always	Always	Always	Always	Always	Not	19 Sep 20	33.0579	7-11a	6	Not	Yes	Yes
396	2	Cusco	89	Fem	25	2	Not	Not	Not	Not	Not	Not	52	1.54	Yes	Not	Yes	Yes	Yes	Yes	Not	Not	Yes	Yes	Yes	Always	Always		Sometimes	Sometimes	Always	Frequently	Yes	27 Sep 20	21.9261	12a+	8	Yes	Not	Yes
128	1	Periphery of Cusco	6361	Masc	40	4	Not	Not	Not	Not	Not	Not	64	1.6	Yes	Yes	Not	Not	Yes	Yes	Not	Not	Not	Yes	Not	Always	Always	Sometimes	Sometimes	Sometimes	Always	Always	Not	14 Sep 20	25	<7a	6	Not	Not	Not
116	2	Periphery of Cusco	3893	Fem	42	5	Not	Not	Not	Not	Not	Not	60	1.58	Not	Not	Not	Not	Not	Not	Not	Not	Not	Not	Not	Frequently	Always	Always	Frequently	Sometimes	Always	Always	Not	14 Sep 20	24.0346	12a+	9	Not	Not	Not
314	1	Cusco	45DR2	Masc	67	5	Not	Not	Not	Not	Not	Not	75	1.59	Yes	Not	Not	Not	Not	Yes	Not	Not	Yes	Yes	Not	Always	Always	Always	Never	Never	Always	Always	Not	20 Sep 20	29.6666	12a+	7	Not	Yes	Yes
826	6	Cusco	45kg10	Masc	36	6	Not	Not	Not	Not	Not	Not	68	1.67	Not	Not	Not	Not	Not	Not	Not	Not	Not	Not	Not	Always	Always		Always	Frequently	Always	Always	Yes	27 Sep 20	24.3824	12a+	10	Not	Yes	Yes
535	2	Cusco	45ER12	Masc	42	4	Not	Not	Not	Not	Not	Not	80	1.7	Not	Not	Not	Not	Not	Not	Not	Not	Yes	Not	Not	Always	Always	Always	Always	Always	Always	Always	Not	20 Sep 20	27.6817	12a+	7	Not	Not	Not
130	3	Periphery of Cusco	4462B	Fem	20	3	Not	Not	Not	Not	Not	Not	70	1.6	Not	Not	Not	Not	Not	Not	Not	Not	Yes	Not	Not	Frequently	Always	Never	Sometimes	Never		Frequently	Not	14 Sep 20	27.3438	12a+	6	Not	Not	Not
299	3	Cusco	45ER23	Masc	19	5	Not	Not	Not	Not	Not	Not	59.8	1.67	Yes	Yes	Not	Yes	Yes	Not	Not	Yes	Yes	Yes	Not	Always	Always	Frequently	Frequently	Never	Always	Frequently	Not	20 Sep 20	21.4422	7-11a	8	Not	Yes	Yes
102	2	Cusco	3162	Fem	45	2	Not	Not	Not	Not	Not	Not	80	1.62	Not	Not	Not	Not	Not	Not	Not	Not	Not	Not	Not	Always	Always	Always	Always	Frequently	Always	Always	Not	14 Sep 20	30.4832	12a+	8	Not	Not	Not
737	5	Cusco	45JL10	Fem	65	6	Not	Not	Not	Not	Not	Not	65	1.47	Not	Not	Not	Not	Not	Not	Not	Not	Not	Not	Not	Always	Always	Frequently	Frequently	Frequently	Always	Always	Not	27 Sep 20	30.0801	12a+	10	Not	Yes	Yes
57	3	Periphery of Cusco	9653	Masc	38	7	Not	Not	Not	Not	Not	Not	58	1.6	Not	Not	Not	Not	Not	Not	Not	Not	Not	Not	Not	Always	Always	Never	Always	Never	Always	Always	Not	14 Sep 20	22.6562	7-11a	7	Not	Yes	Yes
538	1	Cusco	45ER3	Fem	56	2	Not	Not	Not	Not	Not	Not	60	1.5	Not	Not	Not	Not	Not	Not	Not	Not	Not	Not	Not	Always	Always	Never	Sometimes	Never	Always	Always	Not	20 Sep 20	26.6667		8	Not	Not	Not
66	2	Periphery of Cusco	223	Masc	35	5	Not	Not	Not	Not	Not	Not	82	1.72	Not	Not	Yes	Not	Not	Not	Not	Not	Not	Not	Not	Always	Always	Sometimes	Sometimes	Sometimes	Always	Always	Not	14 Sep 20	27.7177	12a+	6	Not	Not	Not
116	5	Periphery of Cusco	3893	Fem	18	5	Not	Not	Not	Not	Not	Not	70	1.71	Not	Yes	Not	Not	Not	Not	Not	Yes	Not	Not	Not	Always	Always	Always			Always	Always	Not	14 Sep 20	23.939	12a+	9	Not	Not	Not
710	1	Periphery of Cusco	45ME05	Masc	58	2	Not	Not	Not	Not	Not	Not	75	1.69	Yes	Not	Not	Not	Not	Not	Yes	Not	Yes	Yes	Not	Always	Always	Sometimes		Never	Always	Always	Not	27 Sep 20	26.2596	12a+	7	Not	Not	Not
13	2	Periphery of Cusco	33	Masc	21	2	Not	Not	Not	Not	Not	Not	58		Not	Not	Not	Not	Not	Not	Not	Not	Yes	Yes	Not	Always	Always				Always	Always	Not	14 Sep 20		7-11a	7	Not	Not	Not
706	4	Periphery of Cusco	45ME14	Fem	29	5	Not	Not	Not	Not	Not	Not	82	1.55	Not	Not	Yes	Not	Yes	Not	Yes	Not	Yes	Not	Yes	Frequently	Frequently	Never	Sometimes	Never	Frequently	Frequently	Yes	27 Sep 20	34.1311	12a+	7	Not	Not	Not
57	4	Periphery of Cusco	9653	Fem	38	7	Not	Not	Not	Not	Not	Not	57	1.55	Not	Not	Yes	Not	Not	Not	Not	Not	Not	Not	Not	Frequently	Always	Sometimes	Sometimes	Frequently	Always	Always	Yes	14 Sep 20	23.7253	7-11a	7	Not	Yes	Yes
83	6	Periphery of Cusco	411A	Masc	20	6	Not	Not	Not	Not	Not	Not	59	1.7	Not	Not	Not	Not	Not	Not	Not	Not	Not	Not	Not	Frequently	Always	Always		Frequently	Always	Always	Not	14 Sep 20	20.4152	12a+	8	Not	Not	Yes
1016 - 436	2	Quillabamba	N6	Fem	25	6	Not	Not	Not	Not	Not	Not	49	1.55	Not	Not	Not	Not	Not	Not	Not	Not	Not	Not	Not	Frequently	Frequently	Never	Never	Never	Frequently	Always	Not	14 Sep 20	20.3954	7-11a	8	Not	Not	Not
1014- 433	1	Quillabamba	N2	Masc	57	5	Not	Not	Not	Not	Not	Not	88	1.59	Not	Not	Not	Not	Not	Not	Not	Not	Not	Not	Not	Frequently	Frequently	Sometimes	Frequently	Sometimes	Frequently	Always	Not	14 Sep 20	34.8088	7-11a	7	Not	Yes	Not
810	2	Periphery of Cusco	4453	Fem	39	4	Not	Not	Not	Not	Not	Not	60	1.56	Not	Not	Not	Not	Not	Not	Not	Not	Not	Not	Not	Always	Always	Never	Always	Sometimes	Always	Always	Not	26 Sep 20	24.6548		7	Not	Not	Not
375	1	Periphery of Cusco	25A14	Masc	58	1	Not	Not	Not	Not	Not	Not	64	1.57	Not	Not	Not	Not	Not	Not	Yes	Not	Not	Not	Not	Sometimes	Sometimes	Never	Never	Never	Sometimes	Sometimes	Not	26 Sep 20	25.9645	7-11a	7	Not	Yes	Yes
367	1	Cusco	452B26	Masc	31	6	Not	Not	Not	Not	Not	Not	60	1.76	Not	Not	Not	Not	Not	Not	Not	Not	Not	Not	Not	Always	Always	Never	Frequently	Never	Always	Always	Yes	26 Sep 20	19.3698	7-11a	9	Not	Yes	Yes
391	6	Cusco	89	Masc	18	8	Not	Not	Not	Not	Not	Not	72	1.62	Yes	Yes	Yes	Yes	Not	Not	Not	Not	Yes	Yes	Not	Always	Always	Sometimes	Sometimes	Never	Frequently	Always	Yes	27 Sep 20	27.4348	7-11a	8	Not	Yes	Yes
517	2	Cusco	_	Fem	26	5	Not	Not	Not	Not	Not	Not	63	1.53	Not	Not	Not	Not	Not	Not	Not	Not	Not	Not	Not	Always	Always	Never	Always	Never	Always	Frequently	Not	20 Sep 20	26.9127	12a+	8	Not	Yes	Not
607	2	Periphery of Cusco	29-JR-04	Masc	34	6	Not	Not	Not	Not	Not	Not	80	1.65	Yes	Not	Not	Not	Not	Not	Not	Not	Not	Not	Not	Always	Always				Always	Always	Yes	27 Sep 20	29.3848	7-11a	6	Not	Yes	Yes
391	3	Cusco	89	Masc	68	8	Not	Not	Not	Not	Not	Not	68	1.64	Yes	Yes	Not	Not	Not	Yes	Not	Yes	Yes	Not	Not	Frequently	Always	Always	Frequently	Never	Always	Always	Not	27 Sep 20	25.2826	7-11a	8	Not	Yes	Yes
1014- 433	4	Quillabamba	N2	Fem	27	5	Not	Not	Not	Not	Not	Not	65	1.62	Not	Not	Not	Not	Not	Not	Not	Not	Not	Not	Not	Frequently	Frequently	Never	Never	Never	Frequently	Frequently	Not	14 Sep 20	24.7676	7-11a	7	Not	Yes	Not
192	4	Quillabamba	192.1.10	Fem	18	6	Not	Not	Not	Not	Not	Not	64	1.71	Not	Not	Not	Not	Not	Not	Not	Not	Not	Not	Not	Frequently	Always	Never	Sometimes	Sometimes	Always	Always	Not	14 Sep 20	21.8871	12a+	6	Not	Yes	Yes
517	3	Cusco	_	Masc	44	5	Not	Not	Not	Not	Not	Not	75	1.65	Not	Not	Yes	Yes	Yes	Yes	Yes	Yes	Yes	Yes	Yes	Frequently	Always	Sometimes	Always	Never	Always	Always	Yes	20 Sep 20	27.5482	12a+	8	Not	Yes	Not
387b	4	Cusco	89		43	5	Not	Not	Not	Not	Not	Not	74	1.59	Yes	Yes	Yes	Not	Not	Yes	Not	Yes	Yes	Yes	Yes	Always	Always		Always		Always	Always	Yes	27 Sep 20	29.271	12a+	8	Not	Not	Not
615	3	Periphery of Cusco	25A26	Fem	37	3	Not	Not	Not	Not	Not	Not	54	1.45	Yes	Yes	Yes	Yes	Yes	Yes	Not	Not	Yes	Yes	Yes	Always	Sometimes	Sometimes	Sometimes	Sometimes	Frequently	Frequently	Yes	26 Sep 20	25.6837	7-11a	10	Not	Yes	Yes
144	3	Cusco	89F	Fem	48	6	Not	Not	Not	Not	Not	Not	82	1.6	Not	Not	Not	Not	Not	Yes	Not	Not	Not	Not	Not	Always	Always		Always	Never	Always	Always	Not	14 Sep 20	32.0312	12a+	8	Not	Not	Not
105	1	Cusco	3161	Masc	67	3	Not	Not	Not	Not	Not	Not	93	1.78	Not	Not	Not	Not	Not	Not	Not	Not	Not	Not	Not	Always	Always	Always	Always		Always	Always	Not	14 Sep 20	29.3524	7-11a	6	Not	Not	Not
822	3	Cusco	45kg06	Fem	82	5	Not	Not	Not	Not	Not	Not	65	1.5	Not	Not	Not	Not	Not	Not	Not	Not	Yes	Not	Not	Frequently	Sometimes	Sometimes	Sometimes	Sometimes	Sometimes	Frequently	Not	27 Sep 20	28.8889	<7a	8	Not	Not	Not
35	2	Periphery of Cusco	3831	Masc	64	4	Yes	Yes	Not	Not	Not	Not	85	1.68	Not	Not	Not	Not	Yes	Yes	Not	Not	Not	Yes	Not	Sometimes	Frequently	Frequently	Frequently		Frequently		Not	14 Sep 20	30.1162	12a+	6	Not	Not	Not
247	1	Periphery of Cusco	5561	Masc		1	Not	Not	Not	Not	Not	Not	83	1.72	Not	Not	Not	Not	Not	Not	Not	Not	Not	Not	Not	Frequently	Always	Frequently	Always	Never	Always	Always	Not	19 Sep 20	28.0557	7-11a	7	Not	Not	Not
404	1	Periphery of Cusco	50ME05	Masc	44	1	Not	Not	Not	Not	Not	Not	60	1.6	Not	Not	Not	Not	Not	Not	Not	Not	Yes	Not	Not	Frequently	Frequently	Never	Sometimes	Never	Frequently	Frequently	Not	27 Sep 20	23.4375	12a+	7	Not	Not	Not
538	2	Cusco	45ER3	Fem	77	2	Not	Not	Not	Not	Not	Not	51	1.5	Not	Not	Not	Not	Not	Not	Not	Not	Not	Not	Not	Always	Always	Never	Never	Never	Always	Always	Yes	20 Sep 20	22.6667	7-11a	8	Not	Not	Not
801	2	Periphery of Cusco	4432	Fem	53	5	Not	Not	Not	Not	Not	Not	73	1.6	Not	Yes	Not	Yes	Not	Yes	Not	Not	Yes	Not	Not	Always							Not	26 Sep 20	28.5156	12a+	6	Not	Not	Not
262	3	Periphery of Cusco	77066	Fem	44	6	Not	Not	Not	Not	Not	Not	55	1.56	Not	Not	Not	Not	Not	Not	Not	Not	Not	Not	Not	Always	Always		Always		Always	Always	Not	19 Sep 20	22.6003	12a+	7	Not	Not	Not
503	3	Cusco	21 ROC05	Masc	46	3	Not	Not	Not	Not	Not	Not	104	1.68	Not	Not	Not	Not	Not	Not	Not	Yes	Not	Not	Not	Always	Always	Sometimes	Always	Never	Always	Frequently	Yes	20 Sep 20	36.8481	12a+	8	Not	Yes	Yes
710	2	Periphery of Cusco	45ME05	Fem	38	2	Not	Not	Not	Not	Not	Not	60	1.5	Yes	Not	Not	Not	Not	Not	Not	Not	Not	Not	Not	Always	Always	Sometimes	Sometimes	Never	Always	Always	Not	27 Sep 20	26.6667	7-11a	7	Not	Not	Not
821	3	Cusco	45kg05	Fem	49	3	Not	Not	Not	Not	Not	Not	62	1.56	Not	Yes	Yes	Not	Not	Yes	Not	Yes	Not	Not	Not	Always	Always		Always		Always	Always	Not	27 Sep 20	25.4767	12a+	7	Not	Not	Not
74	4	Periphery of Cusco	442A	Fem	50	6	Not	Not	Not	Not	Not	Not	83	1.59	Not	Yes	Not	Not	Not	Yes	Yes	Not	Yes	Not	Not	Sometimes	Sometimes	Never	Never	Never	Always	Always	Not	14 Sep 20	32.831		7	Not	Yes	Yes
133	2	Cusco	3114	Fem	50	5	Not	Not	Not	Not	Not	Not	59	1.58	Not	Yes	Not	Not	Not	Not	Not	Not	Not	Not	Not	Always	Always	Sometimes	Always	Sometimes	Always	Always	Yes	14 Sep 20	23.634	12a+	10	Not	Yes	Yes
1022- 432	2	Quillabamba	N1	Fem	32	5	Not	Not	Not	Not	Not	Not	57	1.6	Not	Not	Not	Not	Not	Not	Not	Not	Not	Not	Not	Frequently	Frequently	Never	Never	Never	Frequently	Always	Yes	14 Sep 20	22.2656	12a+	8	Not	Yes	Not
37	3	Periphery of Cusco	3863	Fem	80	5	Yes	Not	Not	Not	Not	Not	60	1.6	Yes	Yes	Yes	Not	Not	Not	Yes	Not	Yes	Yes	Not	Always	Always	Never	Never	Never	Always	Always	Not	14 Sep 20	23.4375	<7a	8	Not	Not	Not
409	3	Periphery of Cusco	50KG1	Masc	53	4	Not	Yes	Not	Not	Not	Not	78	1.68	Not	Not	Not	Not	Not	Not	Not	Not	Not	Not	Not	Always	Always	Sometimes	Sometimes	Sometimes	Always	Always	Not	27 Sep 20	27.6361	7-11a	6	Not	Not	Not
607	5	Periphery of Cusco	29-JR-04	Fem	18	6	Not	Not	Not	Not	Not	Not	52	1.5	Not	Not	Not	Not	Not	Not	Not	Not	Not	Not	Not	Frequently	Always	Sometimes	Sometimes	Never	Always	Always	Not	27 Sep 20	23.1111	7-11a	6	Not	Yes	Yes
607	6	Periphery of Cusco	29-JR-04	Fem	21	6	Not	Not	Not	Not	Not	Not	60	1.57	Not	Not	Not	Not	Not	Not	Not	Not	Not	Not	Not	Frequently	Always	Sometimes	Sometimes	Never	Always	Always	Not	27 Sep 20	24.3418	7-11a	6	Not	Yes	Yes
617	3	Periphery of Cusco	23A28	Fem	45	3	Not	Not	Not	Not	Not	Not	71	1.65	Yes	Yes	Not	Not	Not	Not	Not	Yes	Not	Not	Not	Frequently	Frequently	Never	Frequently	Never	Frequently	Sometimes	Yes	26 Sep 20	26.079	7-11a	9	Not	Not	Not
391	4	Cusco	89	Masc	35	8	Not	Not	Not	Not	Not	Not	76	1.6	Yes	Yes	Yes	Not	Yes	Yes	Yes	Not	Yes	Yes	Yes	Frequently	Always	Sometimes	Sometimes	Sometimes	Always	Always	Yes	27 Sep 20	29.6875	12a+	8	Not	Yes	Yes
146	2	Cusco	89H	Fem	45	7	Not	Not	Not	Not	Not	Not	68	1.6	Not	Not	Not	Not	Not	Not	Not	Not	Not	Not	Not	Always	Always	Never	Always	Always	Always	Always	Yes	14 Sep 20	26.5625	7-11a	9	Not	Not	Not
CHS96	2	Quillabamba	Q1	Masc	33	3	Not	Not	Not	Not	Not	Not			Yes	Yes	Yes	Yes	Yes	Yes	Not	Not	Yes	Yes	Yes	Frequently	Frequently	Never	Sometimes	Never	Always	Frequently	Yes	20 Sep 20		12a+	6	Not	Yes	Yes
CHS96	3	Quillabamba	Q1	Fem	34	3	Not	Not	Not	Not	Not	Not			Not	Yes	Not	Not	Yes	Yes	Not	Not	Yes	Yes	Not		Frequently	Sometimes	Frequently	Sometimes	Always		Not	20 Sep 20		12a+	6	Not	Yes	Yes
731	1	Cusco	45JL02	Fem	55	1	Not	Not	Not	Not	Not	Not	78	1.56	Not	Not	Not	Not	Not	Not	Not	Not	Not	Not	Not	Always	Frequently	Never	Sometimes	Never	Always	Always	Yes	27 Sep 20	32.0513	7-11a	7	Not	Not	Not
246	2	Periphery of Cusco	5562	Masc	79	3	Yes	Not	Not	Not	Not	Not	60	1.68	Not	Not	Not	Not	Not	Not	Not	Not	Not	Not	Not	Frequently	Always	Never	Never	Never	Frequently	Frequently	Not	19 Sep 20	21.2585	<7a	8	Not	Not	Not
730	1	Cusco	45DR18	Fem	55	6	Not	Not	Not	Not	Not	Not	61	1.5	Not	Yes	Not	Not	Not	Yes	Not	Not	Yes	Not	Not	Always	Always	Never	Frequently	Never	Always	Always	Yes	27 Sep 20	27.1111	12a+	7	Not	Yes	Yes
804	2	Periphery of Cusco	4434	Masc	64	2	Not	Not	Not	Not	Not	Not	81	1.73	Not	Not	Not	Not	Not	Not	Not	Not	Not	Not	Not		Sometimes		Sometimes		Frequently	Always	Not	26 Sep 20	27.0641	7-11a	6	Not	Not	Not
394	1	Cusco	sector 8	Masc	55	3	Not	Not	Not	Not	Not	Not	98	1.58	Not	Not	Not	Not	Not	Not	Not	Not	Not	Not	Not	Always	Always		Always		Always	Always	Not	27 Sep 20	39.2565	<7a	6	Not	Not	Not
49	7	Cusco	3011	Fem	46	9	Not	Not	Not	Not	Not	Not	52	1.68	Not	Yes	Not	Not	Not	Not	Not	Not	Yes	Not	Not	Frequently	Always	Never	Always	Never	Always	Frequently	Not	14 Sep 20	18.424	12a+	9	Yes	Not	Not
714	2	Periphery of Cusco	45ME11	Masc	70	2	Not	Not	Not	Not	Not	Not	68	1.6	Not	Not	Not	Not	Not	Not	Not	Not	Not	Not	Not	Frequently	Sometimes	Never	Sometimes	Never	Frequently	Frequently	Not	27 Sep 20	26.5625	<7a	6	Not	Not	Not
567	1	Periphery of Cusco	5331	Fem	50	1	Not	Not	Not	Not	Not	Not	76	1.55	Yes	Not	Not	Not	Not	Not	Yes	Not	Not	Not	Yes	Always	Always	Frequently	Frequently	Never	Always	Frequently	Yes	20 Sep 20	31.6337	7-11a	6	Not	Not	Not
801	3	Periphery of Cusco	4432	Masc	53	5	Not	Not	Not	Not	Not	Not			Not	Not	Not	Not	Not	Not	Not	Not	Not	Not	Not	Always	Always	Always			Always	Always	Not	26 Sep 20		12a+	6	Not	Not	Not
1007-425	1	Periphery of Cusco	1713	Fem	39	4	Not	Yes	Not	Not	Not	Not	60	1.55	Not	Not	Not	Not	Not	Not	Not	Not	Yes	Not	Not	Always	Always	Never	Sometimes	Never	Always	Frequently	Not	19 Sep 20	24.974	12a+	10	Not	Not	Not
801	5	Periphery of Cusco	4432	Masc	82	5	Not	Not	Not	Not	Not	Not	70	1.65	Not	Not	Not	Not	Not	Not	Not	Not	Not	Not	Not	Frequently	Frequently	Never			Frequently		Not	26 Sep 20	25.7117	7-11a	6	Not	Not	Not
411	4	Periphery of Cusco	50KG03	Masc	34	5	Not	Not	Not	Not	Not	Not	76	1.69	Not	Not	Not	Not	Not	Not	Not	Not	Not	Not	Not	Always	Always	Sometimes	Sometimes	Never	Always	Always	Not	27 Sep 20	26.6097	12a+	9	Not	Not	Not
139	4	Cusco	89A	Fem	29	4	Not	Not	Not	Not	Not	Not	64	1.55	Not	Not	Not	Not	Not	Not	Not	Not	Not	Not	Not	Always	Always	Never	Always	Never	Always	Always	Not	14 Sep 20	26.6389	12a+	6	Not	Not	Not
130	2	Periphery of Cusco	4462B	Fem	43	3	Not	Not	Not	Not	Not	Not	80	1.6	Not	Yes	Not	Not	Not	Not	Not	Yes	Not	Not	Not	Sometimes	Always	Never	Sometimes	Always	Always	Always	Yes	14 Sep 20	31.25	7-11a	6	Not	Not	Not
38	3	Periphery of Cusco	3862	Masc	45	5	Not	Not	Not	Not	Not	Not	76	1.7	Yes	Yes	Not	Not	Yes	Yes	Not	Yes	Yes	Not	Not	Frequently	Always	Always	Never	Never	Always	Always	Yes	14 Sep 20	26.2976	12a+	8	Not	Yes	Yes
568	2	Periphery of Cusco	5351	Masc	45	5	Not	Not	Not	Not	Not	Not	99	1.75	Not	Not	Yes	Not	Not	Not	Yes	Yes	Not	Yes	Not	Always	Always	Always	Frequently	Frequently	Frequently	Always	Not	20 Sep 20	32.3265	12a+	8	Not	Not	Yes
607	1	Periphery of Cusco	29-JR-04	Fem	64	6	Not	Not	Not	Not	Not	Not	60	1.5	Not	Not	Yes	Not	Yes	Yes	Not	Not	Yes	Not	Not	Always	Always	Never	Sometimes	Never	Frequently	Frequently	Not	27 Sep 20	26.6667	<7a	6	Not	Yes	Yes
395	7	Cusco	89	Masc	19	9	Not	Not	Not	Not	Not	Not	63	1.63	Not	Not	Not	Not	Yes	Not	Not	Not	Yes	Not	Not	Always	Always	Sometimes	Frequently	Never	Always	Always	Yes	27 Sep 20	23.7118		6	Not	Not	Not
343	1	Periphery of Cusco	2508	Masc	30	2	Not	Not	Not	Not	Not	Not	60	1.63	Not	Not	Not	Not	Not	Yes	Not	Not	Not	Not	Not	Always	Always	Always	Sometimes	Sometimes	Always	Always	Yes	25 Sep 20	22.5827	12a+	7	Not	Not	Not
813	1	Periphery of Cusco	4481	Fem	51	2	Not	Not	Not	Not	Not	Not	45	1.59	Yes	Yes	Yes	Not	Not	Yes	Not	Not	Yes	Yes	Not	Always	Always	Sometimes	Always		Always	Always	Not	26 Sep 20	17.7999	12a+	7	Not	Yes	Yes
23	1	Periphery of Cusco	4951	Fem	71	3	Not	Not	Not	Not	Not	Not	73	1.58	Not	Not	Yes	Not	Not	Not	Not	Not	Yes	Yes	Not	Always	Always	Always	Always	Sometimes	Always	Always	Not	14 Sep 20	29.2421	<7a	6	Not	Not	Yes
116	3	Periphery of Cusco	3893	Masc	20	5	Not	Not	Not	Not	Not	Not	86	1.67	Yes	Not	Not	Not	Not	Not	Yes	Not	Not	Not	Not	Frequently	Always	Never	Frequently	Never	Frequently	Always	Not	14 Sep 20	30.8365	12a+	9	Not	Not	Not
226	4	Periphery of Cusco	s-226	Fem	66	4	Not	Not	Not	Not	Not	Not	60	1.5	Yes	Yes	Not	Not	Not	Not	Not	Not	Not	Not	Not								Not	18 Sep 20	26.6667	<7a	9	Not	Not	Not
228	3	Periphery of Cusco	S-228	Fem	31	3	Not	Not	Not	Not	Not	Not	62	1.55	Not	Not	Not	Not	Not	Not	Not	Not	Not	Not	Not	Always	Always		Sometimes		Always	Always	Not	18 Sep 20	25.8065	12a+	6	Not	Not	Not
98	4	Periphery of Cusco	22271	Masc	24	4	Not	Not	Not	Not	Not	Not	68	1.63	Not	Not	Not	Not	Not	Not	Not	Not	Not	Not	Not	Always	Always	Never	Sometimes	Never	Always	Always	Not	14 Sep 20	25.5937	7-11a	7	Not	Not	Not
128	4	Periphery of Cusco	6361	Fem	23	4	Not	Not	Not	Not	Not	Not	55	1.6	Not	Not	Not	Not	Not	Not	Not	Not	Not	Not	Not	Always	Always	Always	Sometimes	Sometimes	Always	Always	Not	14 Sep 20	21.4844	12a+	6	Not	Not	Not
229	3	Periphery of Cusco	8363	Fem	30	5	Not	Not	Not	Not	Not	Not	56	1.62	Not	Not	Not	Not	Not	Not	Not	Not	Not	Not	Not	Always	Always		Frequently	Never	Always	Always	Not	18 Sep 20	21.3382	12a+	8	Not	Not	Not
304	3	Cusco	45ER23	Masc	36	5	Not	Not	Not	Not	Not	Not	72	1.63	Yes	Yes	Yes	Yes	Yes	Yes	Not	Yes	Yes	Yes	Yes	Always	Always	Never	Sometimes	Never	Always	Always	Yes	20 Sep 20	27.0993	12a+	8	Yes	Yes	Yes
1007-425	2	Periphery of Cusco	1713	Masc	39	4	Not	Not	Not	Not	Not	Not	70	1.69	Not	Not	Yes	Not	Not	Not	Not	Not	Yes	Not	Not	Always	Always	Never	Sometimes	Never	Always	Frequently	Not	19 Sep 20	24.5089	7-11a	10	Not	Not	Not
727	1	Cusco	45DR21	Masc	24	2	Not	Not	Not	Not	Not	Not	94	1.75	Yes	Yes	Yes	Not	Not	Not	Not	Not	Not	Not	Yes	Always	Always	Never	Frequently	Never	Always	Always	Yes	27 Sep 20	30.6939	7-11a	6	Not	Yes	Yes
397	2	Cusco	89	Masc	34	2	Not	Not	Not	Not		Not	68	1.59	Not	Not	Not	Not	Not	Not	Not	Not	Not	Not	Not	Always	Always	Never	Never	Never	Always	Always	Not	27 Sep 20	26.8977	7-11a	6	Not	Not	Not
706	5	Periphery of Cusco	45ME14	Masc	23	5	Not	Not	Not	Not	Not	Not	63	1.65	Not	Not	Not	Not	Not	Not	Not	Yes	Not	Not	Not	Frequently	Frequently	Never	Sometimes	Never	Frequently	Frequently	Yes	27 Sep 20	23.1405	7-11a	7	Not	Not	Not
341	2	Periphery of Cusco	2507	Masc	27	2	Not	Not	Not	Not	Not	Not	60	1.61	Not	Not	Not	Not	Not	Not	Not	Not	Yes	Not	Not	Always	Always				Always	Always	Not	25 Sep 20	23.1472		10	Not	Not	Not
705	1	Cusco	45ME15	Fem	58	3	Not	Not	Not	Not	Not	Not	73	1.5	Not	Yes	Yes	Not	Yes	Yes	Not	Not	Yes	Not	Not	Frequently	Frequently	Never	Sometimes	Never	Frequently	Frequently	Yes	27 Sep 20	32.4444	12a+	7	Not	Not	Not
513	1	Cusco	513.1.10	Masc	39	5	Not	Not	Not	Not	Not	Not	75	1.65	Yes	Not	Yes	Not	Not	Not	Not	Not	Not	Yes	Not	Always	Always	Sometimes	Always	Sometimes	Always	Always	Not	20 Sep 20	27.5482		8	Not	Not	Yes
49	2	Cusco	3011	Masc	29	9	Not	Not	Not	Not	Not	Not	88	1.79	Not	Not	Not	Not	Not	Not	Not	Not	Not	Not	Not	Always	Always	Never		Never	Always	Always	Not	14 Sep 20	27.4648	12a+	9	Yes	Not	Not
257	1	Periphery of Cusco	77011	Fem	49	4	Not	Not	Not	Not	Not	Not	60	1.5	Not	Not	Not	Not	Not	Not	Not	Not	Not	Not	Not	Always	Always	Never	Frequently	Never	Always	Always	Not	19 Sep 20	26.6667	7-11a	6	Not	Not	Not
263	3	Periphery of Cusco	66103	Fem	22	8	Not	Not	Not	Not	Not	Not	61	1.61	Not	Not	Yes	Not	Not	Yes	Yes	Not	Yes	Yes	Yes	Frequently	Frequently	Frequently	Frequently	Frequently	Always	Always	Yes	19 Sep 20	23.533	7-11a	10	Not	Yes	Yes
506	1	Cusco	21roc02	Fem	28	3	Not	Not	Not	Not	Not	Not	65	1.58	Not	Not	Not	Not	Not	Not	Not	Not	Not	Not	Not	Frequently	Always	Never	Sometimes	Never	Always	Always	Not	20 Sep 20	26.0375	12a+	6	Not	Not	Not
66	4	Periphery of Cusco	223	Fem	46	5	Not	Not	Not	Not	Not	Not	104	1.54	Not	Not	Yes	Not	Not	Not	Not	Not	Not	Not	Not	Always	Always	Sometimes	Frequently	Never	Always	Always	Not	14 Sep 20	43.8522	12a+	6	Not	Not	Not
730	3	Cusco	45DR18	Masc	68	6	Not	Not	Not	Not	Not	Not	65	1.72	Not	Not	Not	Not	Not	Not	Not	Not	Not	Not	Not	Always	Always	Never	Always	Never	Always	Always	Yes	27 Sep 20	21.9713	7-11a	7	Not	Yes	Yes
938	3	Quillabamba	47	Fem	25	9	Not	Not	Not	Not	Not	Not			Not	Not	Not	Not	Not	Not	Not	Not	Yes	Not	Not	Always	Always	Never	Never	Never	Always	Always	Yes	20 Sep 20		12a+	10	Not	Not	Not
49	1	Cusco	3011	Fem	46	9	Not	Not	Not	Not	Not	Not	62	1.53	Not	Not	Not	Not	Not	Not	Not	Not	Yes	Not	Not	Frequently	Always	Never	Always	Never	Always	Always	Not	14 Sep 20	26.4855	7-11a	9	Yes	Not	Not
262	1	Periphery of Cusco	77066	Fem	73	6	Yes	Not	Not	Not	Yes	Not	60	1.5	Not	Not	Yes	Yes	Not	Yes	Not	Not	Yes	Yes	Not								Not	19 Sep 20	26.6667	7-11a	7	Not	Not	Not
737	3	Cusco	45JL10	Masc	33	6	Yes	Not	Not	Not	Not	Not	65	1.55	Yes	Yes	Yes	Not	Not	Yes	Not	Not	Yes	Not	Not	Sometimes	Frequently	Sometimes	Sometimes	Never	Frequently	Always	Not	27 Sep 20	27.0552	7-11a	10	Not	Yes	Yes
154	6	Cusco	89P	Fem	66	8	Not	Not	Not	Not	Not	Not	68	1.65	Not	Not	Not	Not	Not	Not	Not	Not	Not	Not	Not	Always	Always	Never	Always	Never	Always	Always	Yes	14 Sep 20	24.977	<7a	9	Not	Not	Not
262	6	Periphery of Cusco	77066	Masc	50	6	Not	Not	Not	Not	Not	Not	98	1.65	Yes	Not	Not	Not	Not	Not	Not	Not	Not	Not	Not	Always	Always		Always		Always	Always	Not	19 Sep 20	35.9963	12a+	7	Not	Not	Not
139	3	Cusco	89A	Fem	24	4	Not	Not	Not	Not	Not	Not	60	1.54	Not	Yes	Not	Not	Not	Not	Not	Not	Yes	Not	Not	Always	Always	Never	Always	Always	Always	Always	Not	14 Sep 20	25.2994	12a+	6	Not	Not	Not
276	3	Periphery of Cusco	66032	Fem	28	4	Not	Not	Not	Not	Not	Not			Not	Not	Not	Not	Not	Not	Yes	Not	Yes	Not	Not	Frequently	Always	Sometimes	Always		Always	Always	Not	19 Sep 20		12a+	8	Not	Not	Yes
458	2	Quillabamba	1008	Fem	37	3	Not	Not	Not	Not	Not	Not	62	1.6	Yes	Not	Yes	Not	Not	Not	Yes	Yes	Yes	Not	Not	Always	Always	Never	Never	Never	Always	Always	Yes	19 Sep 20	24.2188	12a+	8	Not	Yes	Yes
411	1	Periphery of Cusco	50KG03	Masc	56	5	Not	Not	Not	Not	Not	Not	60	1.54	Yes	Not	Not	Not	Not	Not	Not	Not	Yes	Yes	Not	Always	Always	Sometimes	Sometimes	Never	Always	Always	Not	27 Sep 20	25.2994	7-11a	9	Not	Not	Not
83	2	Periphery of Cusco	411A	Fem	39	6	Not	Not	Not	Not	Not	Not	65	1.58	Not	Not	Not	Not	Not	Not	Not	Not	Not	Not	Yes	Always	Always	Never	Always	Never	Always	Always	Yes	14 Sep 20	26.0375	12a+	8	Not	Not	Yes
298	1	Cusco	45DR4	Fem	45	4	Not	Not	Not	Not	Not	Not	68	1.55	Not	Yes	Not	Not	Not	Not	Not	Not	Not	Not	Not	Frequently	Always	Never	Frequently	Sometimes	Always	Always	Not	20 Sep 20	28.3039	<7a	9	Not	Not	Yes
823	3	Cusco	45kg07	Fem	36	3	Not	Not	Not	Not	Not	Not	53	1.48	Not	Not	Not	Not	Not	Not	Not	Not	Not	Not	Not	Frequently	Always	Never	Sometimes	Never	Always	Frequently	Yes	27 Sep 20	24.1965	7-11a	7	Not	Not	Not
308	1	Cusco	45ER17	Fem	46	2	Not	Not	Not	Not	Not	Not	68	1.5	Not	Not	Not	Not	Not	Not	Not	Not	Not	Not	Not	Always	Always	Sometimes	Sometimes	Never	Always	Always	Yes	20 Sep 20	30.2222	12a+	8	Not	Not	Not
394	3	Cusco	sector 8	Fem	34	3	Not	Not	Not	Not	Not	Not	68	1.45	Not	Not	Not	Not	Not	Not	Yes	Not	Yes	Not	Not	Frequently	Always		Always		Always	Always	Not	27 Sep 20	32.3424	12a+	6	Not	Not	Not
226	1	Periphery of Cusco	s-226	Masc	90	4	Yes	Yes	Not	Not	Not	Not	60	1.57	Yes	Yes	Yes	Yes	Not	Not	Not	Not	Not	Not	Not								Not	18 Sep 20	24.3418	7-11a	9	Not	Not	Not
1022- 432	3	Quillabamba	N1	Fem	20	5	Not	Not	Not	Not	Not	Not	68	1.49	Not	Not	Not	Not	Not	Not	Not	Not	Not	Not	Not	Always	Frequently	Never	Never	Never	Frequently	Frequently	Yes	14 Sep 20	30.6292	<7a	8	Not	Yes	Not
192	1	Quillabamba	192.1.10	Fem	55	6	Not	Not	Not	Not	Not	Not	83	1.55	Not	Not	Not	Not	Not	Yes	Not	Not	Not	Yes	Not	Always	Always	Sometimes	Always	Never	Always	Always	Yes	14 Sep 20	34.5474	7-11a	6	Not	Yes	Yes
116	1	Periphery of Cusco	3893	Masc	53	5	Not	Not	Not	Not	Not	Not	72	1.65	Not	Not	Not	Not	Not	Not	Not	Not	Not	Not	Not	Always	Always				Always	Always	Not	14 Sep 20	26.4463	12a+	9	Not	Not	Not
623	2	Periphery of Cusco	25A34	Fem	21	2	Not	Not	Not	Not	Not	Not	55	1.6	Not	Yes	Yes	Not	Yes	Not	Not	Yes	Yes	Not	Not	Always	Always	Never	Sometimes	Never	Always	Always	Yes	26 Sep 20	21.4844	12a+	6	Not	Yes	Yes
5	2	Periphery of Cusco	22222	Fem	56	5	Not	Not	Not	Not	Not	Not			Not	Not	Yes	Not	Not	Not	Not	Not	Yes	Not	Not	Always	Always	Sometimes	Sometimes	Never	Always	Always	Yes	14 Sep 20		7-11a	6	Yes	Yes	Not
391	7	Cusco	89	Fem	58	8	Not	Not	Not	Not	Not	Not	63	1.5	Yes	Yes	Not	Not	Not	Not	Not	Not	Yes	Yes	Not	Always	Always	Never	Frequently	Never	Always	Frequently	Not	27 Sep 20	28	7-11a	8	Not	Yes	Yes
1015	2	Quillabamba	n8	Fem	61	6	Not	Not	Not	Not	Not	Not	84	1.5	Not	Not	Not	Not	Not	Not	Not	Not	Not	Not	Not								Yes	14 Sep 20	37.3333	7-11a	9	Not	Not	Not
49	9	Cusco	3011	Fem	23	9	Not	Not	Not	Not	Not	Not	75	1.68	Yes	Not	Not	Not	Not	Not	Not	Not	Not	Not	Not								Not	14 Sep 20	26.5731	7-11a	9	Yes	Not	Not
252	1	Periphery of Cusco	62141	Fem	39	2	Not	Not	Not	Not	Not	Not	74	1.6	Not	Not	Not	Not	Not	Not	Not	Not	Yes	Not	Not	Always	Always	Never	Frequently	Never	Always	Always	Not	19 Sep 20	28.9062	7-11a	7	Not	Not	Not
7	2	Periphery of Cusco	22231	Masc	53	5	Not	Not	Not	Not	Not	Not	70	1.63	Yes	Not	Not	Not	Not	Not	Not	Yes	Not	Not	Not	Frequently	Always		Sometimes	Never	Always	Always	Not	14 Sep 20	26.3465	12a+	8	Not	Not	Not
29	4	Periphery of Cusco	4411	Fem	36	4	Not	Not	Not	Not	Not	Not	52	1.56	Not	Not	Not	Not	Not	Not	Not	Not	Not	Not	Not	Always	Always	Never	Never	Never	Always	Frequently	Not	14 Sep 20	21.3675	7-11a	6	Not	Not	Not
20	3	Periphery of Cusco	55			3	Yes	Not	Not	Not	Not	Not	80	1.62	Not	Not	Not	Not	Not	Yes	Not	Yes	Yes	Yes	Not	Frequently	Frequently	Frequently	Sometimes	Never	Frequently	Frequently	Not	14 Sep 20	30.4832	12a+	8	Not	Not	Not
1017 - 437	7	Quillabamba	N9	Masc	44	7	Not	Not	Not	Not	Not	Not	68	1.6	Not	Not	Not	Not	Not	Not	Not	Not	Not	Not	Not	Frequently	Frequently	Never	Never	Never	Always	Always	Not	14 Sep 20	26.5625	7-11a	8	Not	Not	Not
254	3	Periphery of Cusco	1722	Masc	25	5	Not	Not	Not	Not	Not	Not	77	1.77	Not	Yes	Not	Not	Not	Not	Not	Not	Not	Not	Not	Always	Always	Frequently	Never	Never	Always	Always	Not	19 Sep 20	24.5779	12a+	7	Not	Not	Not
30	2	Cusco	1161	Fem	36	4	Not	Not	Not	Not	Not	Not	50	1.6	Not	Not	Not	Not	Not	Not	Not	Not	Yes	Not	Not	Always	Always	Sometimes	Never	Never	Always	Always	Not	14 Sep 20	19.5312	12a+	6	Not	Not	Not
806	2	Periphery of Cusco	4474	Masc	52	2	Not	Not	Not	Not	Not	Not	56	1.6	Not	Not	Not	Not	Not	Not	Not	Not	Yes	Not	Not	Always	Always	Never	Always	Never	Always	Always	Not	26 Sep 20	21.875	12a+	6	Not	Not	Not
535	1	Cusco	45ER12	Fem	42	4	Not	Not	Not	Not	Not	Not	76	1.69	Not	Not	Not	Not	Not	Not	Not	Not	Yes	Not	Not	Always	Always	Always	Always	Always	Always	Always	Not	20 Sep 20	26.6097	12a+	7	Not	Not	Not
271	5	Periphery of Cusco	66063	Masc	33	5	Not	Not	Not	Not	Not	Not	80	1.68	Not	Yes	Not	Not	Not	Not	Not	Yes	Not	Not	Yes	Frequently	Always	Sometimes	Sometimes	Never	Always	Frequently	Yes	19 Sep 20	28.3447	12a+	7	Not	Not	Yes
105	2	Cusco	3161	Masc	38	3	Not	Not	Not	Not	Not	Not	65	1.68	Not	Not	Not	Not	Not	Not	Not	Yes	Not	Not	Not	Always	Always	Always	Frequently	Never	Always	Always	Not	14 Sep 20	23.03	12a+	6	Not	Not	Not
1007-425	3	Periphery of Cusco	1713	Fem	41	4	Not	Not	Not	Not	Not	Not	60	1.57	Not	Yes	Not	Not	Not	Not	Not	Yes	Not	Not	Not	Always	Always	Sometimes	Sometimes	Never	Always	Always	Not	19 Sep 20	24.3418	7-11a	10	Not	Not	Not
57	5	Periphery of Cusco	9653	Masc	19	7	Not	Not	Not	Not	Not	Not	60	1.75	Not	Not	Not	Not	Not	Not	Not	Not	Not	Not	Not	Frequently	Always	Never	Sometimes	Never	Frequently	Frequently	Not	14 Sep 20	19.5918	7-11a	7	Not	Yes	Yes
66	5	Periphery of Cusco	223	Masc	49	5	Not	Not	Not	Not	Not	Not	68	1.69	Not	Not	Not	Not	Yes	Not	Not	Not	Not	Not	Not	Always	Always	Sometimes	Sometimes	Never	Frequently	Always	Yes	14 Sep 20	23.8087	12a+	6	Not	Not	Not
1010 - 428	4	Quillabamba	q2	Masc	46	6	Not	Not	Not	Not	Not	Not	76	1.49	Not	Not	Not	Not	Not	Not	Not	Not	Not	Not	Not	Frequently	Frequently	Never	Never	Never	Frequently	Always	Not	14 Sep 20	34.2327	7-11a	7	Not	Yes	Not
240	1	Periphery of Cusco	5513	Fem	41	1	Not	Not	Not	Not	Not	Not	65	1.5	Not	Not	Not	Not	Not	Not	Not	Not	Not	Not	Not	Frequently	Always	Never	Always	Frequently	Always	Frequently	Not	19 Sep 20	28.8889	7-11a	7	Not	Not	Not
395	3	Cusco	89	Fem	51	9	Yes	Not	Not	Not	Not	Not	74	1.6	Not	Not	Not	Not	Not	Not	Not	Not	Yes	Not	Not	Always	Always		Frequently	Never	Always	Always	Not	27 Sep 20	28.9062	7-11a	6	Not	Not	Not
23	3	Periphery of Cusco	4951	Fem	22	3	Not	Not	Not	Not	Not	Yes	52	1.5	Not	Yes	Not	Not	Not	Yes	Not	Not	Yes	Yes	Yes	Frequently	Always	Frequently	Frequently		Always	Always	Yes	14 Sep 20	23.1111	12a+	6	Not	Not	Yes
938	2	Quillabamba	47	Masc	69	9	Not	Yes	Not	Not	Not	Not			Not	Not	Not	Not	Not	Not	Not	Not	Not	Not	Not	Always	Always	Never	Never	Never	Always	Always	Not	20 Sep 20			10	Not	Not	Not
229	2	Periphery of Cusco	8363	Fem	62	5	Yes	Not	Not	Not	Not	Not	61	1.57	Not	Not	Not	Not	Not	Not	Not	Not	Not	Not	Not	Always	Always		Frequently	Never	Always	Always	Not	18 Sep 20	24.7475	12a+	8	Not	Not	Not
94	3	Periphery of Cusco	22253	Masc	23	5	Not	Not	Not	Not	Not	Not	56	1.6	Not	Not	Not	Not	Not	Not	Not	Not	Not	Not	Not	Frequently	Frequently	Never	Frequently	Never	Always	Frequently	Not	14 Sep 20	21.875	12a+	6		Not	Not
621	1	Periphery of Cusco	25A32	Fem	43	1	Not	Not	Not	Not	Not	Not	58	1.62	Not	Not	Not		Not	Not	Not	Not	Not	Not	Not	Always	Always	Always	Always	Never	Always	Always	Not	26 Sep 20	22.1003	7-11a	6	Not	Yes	Yes
257	3	Periphery of Cusco	77011	Masc	53	4	Not	Not	Not	Not	Not	Not	87	1.76	Not	Yes	Yes	Not	Not	Not	Yes	Not	Not	Not	Not	Frequently	Always	Frequently	Sometimes	Sometimes	Always	Always	Not	19 Sep 20	28.0863	12a+	6	Not	Not	Not
22	1	Periphery of Cusco	493A1	Fem	73	4	Not	Not	Not	Not	Not	Not	70	1.57	Yes	Yes	Yes	Not	Yes	Not	Not	Not	Yes	Yes	Yes	Always	Always	Never	Never	Sometimes	Frequently	Frequently	Yes	14 Sep 20	28.3987	<7a	6	Not	Yes	Yes
408	5	Periphery of Cusco	50ME08	Fem	75	7	Yes	Not	Not	Not	Not	Not	67	1.56	Yes	Not	Not	Not	Not	Not	Not	Not	Not	Not	Not	Frequently	Frequently	Never	Sometimes	Never	Frequently	Frequently	Not	27 Sep 20	27.5312	<7a	9	Not	Not	Not
83	3	Periphery of Cusco	411A	Masc	66	6	Not	Not	Not	Not	Not	Not	75	1.61	Not	Not	Not	Not	Not	Not	Yes	Not	Not	Not	Not	Always	Always	Never	Frequently	Never	Always	Frequently	Not	14 Sep 20	28.9341	12a+	8	Not	Not	Yes
142	3	Cusco	89D	Fem	27	4	Not	Not	Not	Not	Not	Not	63	1.53	Not	Not	Not	Not	Not	Not	Not	Not	Yes	Not	Not	Always	Always	Never	Never	Never	Always	Always	Not	14 Sep 20	26.9127	12a+	6	Not	Not	Not
130	1	Periphery of Cusco	4462B	Masc	40	3	Not	Not	Not	Not	Not	Not	64	1.67	Not	Yes	Not	Not	Not	Not	Not	Not	Not	Not	Not	Always	Always	Never	Always	Always	Always	Always	Not	14 Sep 20	22.9481	7-11a	6	Not	Not	Not
20	1	Periphery of Cusco	55	Masc	22	3	Not	Not	Not	Not	Yes	Not	60	1.75	Not	Not	Not	Not	Not	Not	Not	Not	Not	Not	Not	Frequently	Frequently	Frequently	Frequently	Never	Frequently	Frequently	Not	14 Sep 20	19.5918	12a+	8	Not	Not	Not
398	2	Cusco	89	Masc	28	5	Not	Not	Not	Not	Not	Not	85	1.78	Not	Not	Not	Not	Not	Not	Not	Not	Not	Not	Not	Always	Always	Sometimes	Always	Never	Always	Frequently	Not	27 Sep 20	26.8274	12a+	6	Not	Not	Not
254	5	Periphery of Cusco	1722	Fem	37	5	Not	Not	Not	Not	Not	Not	60	1.47	Yes	Not	Not	Not	Not	Not	Not	Not	Yes	Not	Not	Always	Always	Never	Always	Never	Always	Frequently	Not	19 Sep 20	27.7662	12a+	7	Not	Not	Not
38	2	Periphery of Cusco	3862	Fem	43	5	Not	Not	Not	Not	Not	Not	65	1.63	Not	Not	Yes	Not	Not	Yes	Not	Yes	Yes	Not	Not	Always	Always	Sometimes	Always	Never	Always	Always	Yes	14 Sep 20	24.4646	12a+	8	Not	Yes	Yes
1007-425	4	Periphery of Cusco	1713	Fem	20	4	Not	Not	Not	Not	Not	Not	57	1.56	Not	Not	Not	Not	Not	Not	Not	Not	Not	Not	Not	Always	Always	Never	Sometimes	Never	Always	Frequently	Not	19 Sep 20	23.4221	12a+	10	Not	Not	Not
1014- 433	5	Quillabamba	N2	Masc	28	5	Not	Not	Not	Not	Not	Not	67	1.55	Not	Not	Not	Not	Not	Not	Not	Not	Not	Not	Not	Frequently	Frequently	Never	Never	Never	Frequently	Always	Yes	14 Sep 20	27.8876	7-11a	7	Not	Yes	Not
257	4	Periphery of Cusco	77011	Fem	50	4	Not	Not	Not	Not	Not	Not	61	1.56	Not	Not	Not	Not	Not	Not	Not	Not	Yes	Not	Not	Always	Frequently	Always	Sometimes	Sometimes	Always	Always	Not	19 Sep 20	25.0658	12a+	6	Not	Not	Not
706	3	Periphery of Cusco	45ME14	Fem	23	5	Not	Not	Not	Not	Not	Not	61	1.52	Yes	Not	Not	Not	Yes	Yes	Not	Not	Yes	Yes	Yes	Always	Always	Never	Always	Never	Always	Always	Yes	27 Sep 20	26.4024	12a+	7	Not	Not	Not
367	3	Cusco	452B26	Fem	32	6	Not	Not	Not	Not	Not	Not	65	1.63	Not	Not	Not	Not	Not	Not	Not	Not	Not	Not	Not	Always	Always	Never	Frequently	Never	Always	Always	Yes	26 Sep 20	24.4646	7-11a	9	Not	Yes	Yes
123	3	Periphery of Cusco	9624	Fem	26	3	Not	Not	Not	Not	Not	Not	87	1.67	Not	Not	Yes	Not	Yes	Yes	Not	Not	Yes	Yes	Yes	Frequently	Frequently	Never	Never	Never	Frequently	Frequently	Yes	14 Sep 20	31.1951	12a+	6	Not	Not	Not
145	5	Cusco	89G	Masc	34	6	Not	Not	Not	Not	Not	Not			Not	Not	Not	Not	Not	Not	Not	Not	Not	Not	Not	Always	Always	Always	Always	Sometimes	Always	Always	Not	14 Sep 20		<7a	7	Not	Not	Not
382	1	Periphery of Cusco	25A02	Fem	21	2	Not	Not	Not	Not	Not	Not	73		Not	Not	Not	Not	Not	Not	Not	Not	Not	Not	Not	Always	Always	Sometimes	Always	Sometimes	Always	Always	Not	26 Sep 20		12a+	8	Not	Not	Not
813	2	Periphery of Cusco	4481	Fem	45	2	Not	Not	Not	Not	Not	Not	54	1.57	Not	Not	Not	Not	Not	Not	Not	Not	Yes	Not	Not	Always	Always	Sometimes	Always	Sometimes	Always	Always	Not	26 Sep 20	21.9076	12a+	7	Not	Yes	Yes
708	2	Periphery of Cusco	45ME05B	Masc	54	5	Not	Not	Not	Not	Not	Not	63	1.57	Not	Not	Not	Not	Yes	Yes	Yes	Not	Yes	Yes	Not	Frequently	Always	Never	Always	Never	Always	Always	Yes	27 Sep 20	25.5588	7-11a	8	Not	Not	Not
263	8	Periphery of Cusco	66103	Masc	59	8	Yes	Not	Not	Not	Not	Not	90	1.69	Not	Not	Not	Not	Not	Not	Not	Not	Yes	Not	Not	Sometimes	Always	Sometimes	Never	Sometimes	Always	Frequently	Not	19 Sep 20	31.5115	12a+	10	Not	Yes	Yes
35	3	Periphery of Cusco	3831	Masc	38	4	Not	Not	Not	Not	Not	Not	76	1.75	Not	Not	Yes	Not	Not	Not	Yes	Yes	Yes	Yes	Not	Always	Always	Never	Frequently	Never	Always	Always	Yes	14 Sep 20	24.8163	12a+	6	Not	Not	Not
1018- 439	4	Quillabamba	N11	Fem	27	6	Not	Not	Not	Not	Not	Not	65	1.6	Not	Not	Not	Not	Not	Not	Not	Not	Not	Not	Not	Frequently	Frequently	Never	Never	Never	Frequently	Always	Not	14 Sep 20	25.3906	7-11a	6	Not	Yes	Yes
144	2	Cusco	89F	Fem	30	6	Not	Not	Not	Not	Not	Not	60	1.7	Not	Not	Not	Not	Not	Not	Not	Not	Yes	Not	Yes	Always	Always	Never	Always	Never	Always	Always	Yes	14 Sep 20	20.7613	7-11a	8	Not	Not	Not
228	2	Periphery of Cusco	S-228	Fem	53	3	Not	Not	Not	Not	Not	Not	58	1.5	Not	Not	Not	Not	Not	Not	Not	Not	Not	Not	Not	Always	Frequently		Sometimes		Always	Frequently	Not	18 Sep 20	25.7778	7-11a	6	Not	Not	Not
38	4	Periphery of Cusco	3862	Fem	40	5	Not	Not	Not	Not	Not	Not	60	1.58	Not	Not	Yes	Not	Not	Yes	Not	Not	Not	Yes	Not	Always	Always	Always	Sometimes	Never	Always	Sometimes	Yes	14 Sep 20	24.0346	12a+	8	Not	Yes	Yes
146	7	Cusco	89H	Masc	52	7	Not	Not	Not	Not	Not	Yes	75	1.68	Not	Not	Not	Not	Not	Not	Not	Not	Not	Not	Not	Frequently	Always	Frequently	Always	Sometimes	Always	Always	Not		26.5731	<7a	9	Not	Not	Not
58	1	Periphery of Cusco	9622	Fem	22	4	Not	Not	Not	Not	Not	Not	53	1.49	Not	Not	Not	Not	Not	Not	Not	Not	Not	Not	Not	Always	Always	Always	Sometimes		Always	Always	Not	14 Sep 20	23.8728	12a+	6	Not	Not	Not
708	1	Periphery of Cusco	45ME05B	Masc	31	5	Not	Not	Not	Not	Not	Not	82	1.62	Not	Not	Not	Not	Not	Not	Not	Not	Yes	Not	Not	Frequently	Frequently	Never	Sometimes	Never	Frequently	Frequently	Yes	27 Sep 20	31.2452	12a+	8	Not	Not	Not
627	5	Cusco	212B31	Masc	58	5	Yes	Not	Not	Not	Not	Not	90	1.72	Not	Not	Not	Not	Not	Yes	Not	Not	Not	Not	Not	Always	Always	Never	Never	Never	Always	Always	Not	26 Sep 20	30.4218	12a+	6	Not	Not	Not
394	2	Cusco	sector 8	Masc	32	3	Not	Not	Not	Not	Not	Not	60	1.58	Not	Not	Not	Not	Not	Not	Not	Not	Not	Not	Not	Always	Always		Always		Always	Always	Not	27 Sep 20	24.0346	12a+	6	Not	Not	Not
298	3	Cusco	45DR4	Fem	39	4	Not	Not	Not	Not	Not	Not	60	1.52	Not	Not	Not	Not	Yes	Not	Not	Not	Yes	Not	Not	Always	Always	Always	Never		Always	Always	Not	20 Sep 20	25.9695		9	Not	Not	Yes
723	5	Cusco	45DR25	Masc		5	Not	Not	Not	Not	Yes	Not	60	1.55	Not	Not	Not	Not	Not	Not	Not	Not	Not	Not	Not	Always	Always	Never	Frequently	Never	Always	Always	Not	27 Sep 20	24.974	12a+	8	Not	Not	Not
1006-424	1	Periphery of Cusco	1732	Masc	60	1	Not	Not	Not	Not	Not	Not	75	1.7	Not	Not	Not	Not	Not	Not	Not	Not	Not	Not	Not	Always	Always	Never	Frequently		Always	Always	Not	19 Sep 20	25.9516	7-11a	6	Not	Not	Not
627	3	Cusco	212B31	Masc	19	5	Not	Not	Not	Not	Not	Not	67	1.77	Not	Not	Not	Not	Not	Not	Not	Not	Not	Not	Not	Always	Always	Never	Never	Never	Always	Always	Not	26 Sep 20	21.3859	12a+	6	Not	Not	Not
276	2	Periphery of Cusco	66032	Fem	56	4	Not	Not	Not	Not	Not	Not	50	1.6	Not	Not	Yes	Not	Not	Not	Not	Not	Not	Not	Not	Always	Always		Always		Always	Always	Not	19 Sep 20	19.5312	12a+	8	Not	Not	Yes
139	2	Cusco	89A	Fem	57	4	Yes	Not	Not	Not	Not	Not	65	1.5	Yes	Not	Not	Not	Not	Not	Not	Not	Yes	Not	Not	Always	Always	Frequently	Always	Never	Always	Always	Not	14 Sep 20	28.8889	<7a	6	Not	Not	Not
730	6	Cusco	45DR18	Fem	52	6	Yes	Not	Not	Not	Not	Not	48	1.5	Yes	Not	Not	Not	Not	Not	Not	Not	Yes	Not	Not	Always	Always	Never	Sometimes	Never	Always	Always	Not	27 Sep 20	21.3333	7-11a	7	Not	Yes	Yes
57	6	Periphery of Cusco	9653	Masc	29	7	Not	Not	Not	Not	Not	Not	68	1.68	Yes	Yes	Yes	Yes	Yes	Not	Not	Yes	Yes	Not	Yes	Frequently	Always	Sometimes	Sometimes	Never	Frequently	Frequently	Not	14 Sep 20	24.093	12a+	7	Not	Yes	Yes
901	3	Quillabamba	10	Masc	23	3	Not	Not	Not	Not	Not	Not	62	1.66	Yes	Yes	Not	Not	Not	Not	Not	Not	Not	Not	Not	Always	Always	Never	Never	Never			Yes	20 Sep 20	22.4996	12a+	6	Not	Not	Not
76	4	Periphery of Cusco	423	Fem	31	5	Not	Not	Not	Not	Not	Not	57	1.55	Not	Yes	Not	Not	Not	Yes	Not	Not	Not	Yes	Not	Always	Always	Never	Always	Never	Always	Always	Yes	14 Sep 20	23.7253	12a+	8	Not	Not	Not
34	2	Periphery of Cusco	3881	Fem	22	6	Not	Not	Not	Not	Not	Not	60	1.63	Not	Not	Not	Not	Not	Not	Not	Not	Not	Yes	Not	Always	Always	Sometimes	Sometimes	Never	Always	Always	Not	14 Sep 20	22.5827	12a+	9	Not	Not	Not
1018- 439	6	Quillabamba	N11	Masc		6	Not	Not	Not	Not	Not	Not	16	0.9	Not	Not	Not	Not	Not	Not	Not	Not	Not	Not	Not	Frequently	Never	Never	Never	Never	Never	Frequently	Not	14 Sep 20	19.7531	7-11a	6	Not	Yes	Yes
822	2	Cusco	45kg06	Fem	46	5	Not	Not	Not	Not	Not	Not	60	1.58	Not	Not	Not	Not	Not	Not	Not	Not	Not	Not	Not	Always	Always	Always	Always	Frequently	Always	Always	Yes	27 Sep 20	24.0346	7-11a	8	Not	Not	Not
723	2	Cusco	45DR25	Fem	23	5	Not	Not	Not	Not	Not	Not	55	1.56	Not	Yes	Not	Not	Not	Not	Not	Not	Yes	Not	Not	Always	Always	Never	Frequently	Never	Always	Always	Not	27 Sep 20	22.6003	12a+	8	Not	Not	Not
350	7	Periphery of Cusco	29033	Masc	25	7	Not	Not	Not	Not	Not	Not	80	1.75	Not	Not	Not	Not	Not	Not	Not	Not	Yes	Not	Not	Always	Always	Always	Frequently	Sometimes	Always	Frequently	Not	26 Sep 20	26.1225	12a+	8	Not	Not	Not
343	2	Periphery of Cusco	2508	Fem	25	2	Not	Not	Not	Not	Not	Not	56	1.51	Not	Not	Not	Not	Not	Yes	Not	Not	Not	Not	Not	Always	Always	Always	Sometimes	Sometimes	Always	Always	Yes	25 Sep 20	24.5603	7-11a	7	Not	Not	Not
458	3	Quillabamba	1008	Fem	33	3	Not	Not	Not	Not	Not	Not	62	1.6	Not	Not	Yes	Not	Not	Not	Not	Not	Yes	Not	Not	Always	Always	Never	Never	Never	Always	Always	Not	19 Sep 20	24.2188	12a+	8	Not	Yes	Yes
98	1	Periphery of Cusco	22271	Fem	28	4	Not	Not	Not	Not	Not	Not	63	1.6	Not	Not	Not	Not	Not	Not	Not	Not	Not	Not	Not	Frequently	Frequently	Never	Sometimes	Never	Frequently	Frequently	Not	14 Sep 20	24.6094	12a+	7	Not	Not	Not
22	2	Periphery of Cusco	493A1	Masc	33	4	Not	Not	Not	Not	Not	Not	88	1.72	Not	Not	Yes	Yes	Yes	Yes	Not	Not	Yes	Yes	Yes	Frequently	Always	Sometimes	Sometimes	Sometimes	Frequently	Frequently	Yes	14 Sep 20	29.7458	7-11a	6	Not	Yes	Yes
1019- 440	4	Quillabamba	NC12	Masc	44	5	Not	Not	Not	Not	Not	Not	83	1.57	Not	Not	Not	Not	Not	Not	Not	Not	Not	Not	Not	Frequently	Frequently	Never	Never	Never	Frequently	Frequently	Not	14 Sep 20	33.6728	<7a	10	Not	Yes	Yes
706	1	Periphery of Cusco	45ME14	Masc	32	5	Not	Not	Not	Not	Not	Not	72	1.65	Not	Not	Not	Not	Yes	Not	Not	Not	Not	Not	Not	Frequently	Frequently	Never	Sometimes	Never	Frequently	Frequently	Yes	27 Sep 20	26.4463	12a+	7	Not	Not	Not
810	4	Periphery of Cusco	4453	Masc	86	4	Not	Not	Not	Not	Not	Not	68	1.57	Not	Not	Not	Not	Not	Not	Not	Not	Not	Not	Not								Not	26 Sep 20	27.5873	12a+	7	Not	Not	Not
61	2	Periphery of Cusco	22.1B	Masc	29	4	Not	Not	Not	Not	Not	Not	66	1.7	Not	Not	Not	Not	Not	Not	Not	Not	Not	Yes	Not	Frequently	Frequently	Frequently	Sometimes	Never	Frequently	Frequently	Not	14 Sep 20	22.8374	12a+	8	Not	Not	Not
30	1	Cusco	1161	Masc	49	4	Not	Not	Not	Not	Not	Not	75	1.75	Not	Not	Not	Not	Not	Not	Not	Not	Yes	Not	Not	Always	Always	Sometimes	Frequently	Never	Always	Always	Not	14 Sep 20	24.4898	12a+	6	Not	Not	Not
212	4	Quillabamba	Q212	Fem	41	4	Not	Not	Not	Not	Not	Not	75		Not	Not	Not	Not	Not	Yes	Not	Not	Not	Not	Not	Always	Always	Always	Sometimes	Sometimes	Always	Always	Not	14 Sep 20		12a+	6	Not	Yes	Yes
1017 - 437	1	Quillabamba	N9	Fem	50	7	Not	Not	Not	Not	Not	Not	67	1.5	Not	Not	Not	Not	Not	Not	Not	Not	Yes	Not	Not	Frequently	Always	Sometimes	Sometimes	Sometimes	Always	Always	Not	14 Sep 20	29.7778	12a+	8	Not	Not	Not
1017 - 437	4	Quillabamba	N9	Fem	77	7	Not	Not	Not	Not	Not	Not	82	1.48	Not	Not	Not	Not	Not	Not	Not	Not	Not	Not	Not	Frequently	Frequently	Never	Never	Never	Sometimes	Sometimes	Not	14 Sep 20	37.4361	<7a	8	Not	Not	Not
CHS96	1	Quillabamba	Q1	Fem	39	3							59	1.47												Frequently	Always	Never	Sometimes	Never	Always	Always	Not	20 Sep 20	27.3034	12a+	6	Not	Yes	Yes
411	5	Periphery of Cusco	50KG03	Fem	57	5	Not	Not	Not	Not	Not	Not	59	1.46	Not	Not	Not	Not	Not	Not	Not	Not	Yes	Not	Not	Always	Always	Sometimes	Sometimes	Never	Always	Always	Yes	27 Sep 20	27.6787	7-11a	9	Not	Not	Not
98	2	Periphery of Cusco	22271	Masc	26	4	Not	Not	Not	Not	Not	Not	85	1.7	Not	Not	Not	Not	Not	Not	Not	Not	Not	Not	Not	Always	Always	Never	Never	Never	Always	Frequently	Not	14 Sep 20	29.4118	7-11a	7	Not	Not	Not
1022- 432	1	Quillabamba	N1	Fem	28	5	Not	Not	Not	Not	Not	Not	68	1.52	Not	Not	Not	Not	Not	Not	Not	Not	Not	Not	Not	Frequently	Frequently	Sometimes	Frequently	Frequently	Frequently	Always	Not	14 Sep 20	29.4321	12a+	8	Not	Yes	Not
1018- 439	2	Quillabamba	N11	Masc	57	6	Not	Not	Not	Not	Not	Not	60	1.6	Not	Not	Not	Not	Not	Not	Not	Not	Not	Not	Not	Frequently	Frequently	Never	Never	Never	Always	Frequently	Not	14 Sep 20	23.4375		6	Not	Yes	Yes
725	1	Cusco	45DR23	Fem	56	3	Not	Not	Not	Not	Not	Not	65	1.6	Yes	Not	Not	Not	Not	Not	Not	Not	Yes	Yes	Not	Always	Always	Never	Sometimes	Never	Always	Always	Yes	27 Sep 20	25.3906	7-11a	6	Not	Not	Not
64	1	Periphery of Cusco	222	Fem	49	4	Not	Not	Not	Not	Not	Not	70	1.55	Not	Not	Yes	Not	Not	Not	Not	Not	Not	Yes	Not	Sometimes	Always		Sometimes		Frequently	Always	Not	14 Sep 20	29.1363		6	Not	Not	Not
74	2	Periphery of Cusco	442A	Masc	59	6	Not	Not	Not	Not	Not	Not	86		Not	Not	Not	Not	Not	Not	Not	Not	Yes	Yes	Not	Sometimes	Frequently	Sometimes	Frequently	Sometimes	Frequently	Frequently	Yes	14 Sep 20		7-11a	7	Not	Yes	Yes
737	4	Cusco	45JL10	Masc	43	6	Not	Not	Not	Not	Not	Not	98	1.75	Not	Not	Not	Not	Not	Not	Not	Not	Yes	Not	Not	Always	Always	Never	Sometimes	Never	Always	Always	Not	27 Sep 20	32	7-11a	10	Not	Yes	Yes
458	1	Quillabamba	1008	Masc	31	3	Not	Not	Not	Not	Not	Not	78	1.7	Not	Not	Not	Not	Not	Not	Not	Not	Yes	Not	Not	Always	Always	Never	Never	Never	Always	Always	Not	19 Sep 20	26.9896	7-11a	8	Not	Yes	Yes
336	1	Periphery of Cusco	2502	Masc	59	2	Not	Not	Not	Not	Not	Not	71	1.62	Not	Not	Yes	Not	Not	Not	Not	Not	Yes	Yes	Not	Frequently	Sometimes	Never	Sometimes	Never	Frequently	Always	Not	25 Sep 20	27.0538	<7a	6	Not	Yes	Yes
154	7	Cusco	89P	Masc	27	8	Not	Not	Not	Not	Not	Not	70	1.65	Not	Not	Not	Not	Not	Not	Not	Not	Not	Not	Not	Always	Always	Sometimes	Always	Always	Always	Always	Yes	14 Sep 20	25.7117	7-11a	9	Not	Not	Not
727	2	Cusco	45DR21	Masc	19	2	Not	Not	Not	Not	Not	Not	100	1.8	Not	Yes	Not	Not	Not	Not	Not	Not	Not	Not	Not	Always	Always	Never	Never	Never	Always	Always	Yes	27 Sep 20	30.8642	12a+	6	Not	Yes	Yes
94	2	Periphery of Cusco	22253	Fem	24	5	Not	Not	Not	Not	Not	Not	48	1.55	Not	Not	Not	Not	Not	Not	Not	Not	Not	Not	Not	Frequently	Frequently	Never	Sometimes	Sometimes	Frequently	Frequently	Not	14 Sep 20	19.9792	12a+	6		Not	Not
1016 - 436	6	Quillabamba	N6	Fem	67	6	Not	Not	Not	Not	Not	Not	60	1.5	Not	Not	Not	Not	Not	Not	Not	Not	Not	Not	Not	Frequently	Frequently	Never	Never	Never	Frequently	Always	Not	14 Sep 20	26.6667		8	Not	Not	Not
370	3	Periphery of Cusco	25A13	Fem	22	3	Not	Not	Not	Not	Not	Not	60	1.66	Yes	Yes	Not	Not	Yes	Not	Not	Yes	Yes	Yes	Not	Frequently	Always	Never	Frequently	Sometimes	Always	Frequently	Yes	26 Sep 20	21.7738	12a+	6	Not	Not	Not
1019- 440	5	Quillabamba	NC12	Masc	40	5	Not	Not	Not	Not	Not	Not	90	1.52	Not	Not	Not	Not	Not	Not	Not	Not	Not	Not	Not	Frequently	Frequently		Sometimes	Sometimes	Frequently	Always	Not	14 Sep 20	38.9543	7-11a	10	Not	Yes	Yes
94	1	Periphery of Cusco	22253	Masc	52	5	Not	Not	Not	Not	Not	Not	65	1.62	Not	Not	Not	Not	Not	Not	Not	Not	Not	Not	Not	Frequently	Always	Sometimes	Frequently	Never	Always	Frequently	Not	14 Sep 20	24.7676	12a+	6		Not	Not
307	2	Cusco	45ER16	Fem	49	2	Not	Not	Not	Not	Not	Not	63	1.6	Not	Yes	Not	Not	Not	Not	Not	Not	Yes	Yes	Not	Always	Always	Never	Sometimes	Sometimes	Always	Always	Not	20 Sep 20	24.6094	12a+	6	Not	Yes	Yes
519	4	Cusco	_	Fem	31	6	Not	Not	Not	Not	Not	Not	55	1.56	Not	Not	Not	Not	Not	Not	Not	Not	Not	Not	Not	Frequently	Always	Never	Always	Never	Always	Frequently	Not	20 Sep 20	22.6003	12a+	8	Yes	Yes	Not
76	5	Periphery of Cusco	423	Fem	65	5	Not	Not	Not	Not	Not	Not	74	1.5	Yes	Yes	Not	Not	Not	Not	Not	Not	Not	Not	Not	Always	Always	Never	Always	Never	Always	Always	Not	14 Sep 20	32.8889	7-11a	8	Not	Not	Not
725	2	Cusco	45DR23	Fem	39	3	Not	Not	Not	Not	Not	Not	60	1.5	Not	Not	Not	Not	Not	Not	Not	Not	Yes	Not	Not	Always	Always	Frequently	Frequently	Never	Always	Always	Yes	27 Sep 20	26.6667	12a+	6	Not	Not	Not
254	1	Periphery of Cusco	1722	Masc	37	5	Not	Not	Not	Not	Not	Not	67	1.64	Not	Yes	Yes	Not	Not	Not	Not	Not	Not	Not	Not	Always	Always	Always	Sometimes	Sometimes	Frequently	Frequently	Not	19 Sep 20	24.9108	12a+	7	Not	Not	Not
30	3	Cusco	1161	Masc	82	4	Yes	Not	Not	Not	Not	Not	80	1.75	Not	Not	Not	Not	Not	Not	Not	Not	Not	Not	Not	Always	Always	Never		Never	Always	Always	Not	14 Sep 20	26.1225	12a+	6	Not	Not	Not
1015	6	Quillabamba	n8	Masc	54	6	Not	Not	Not	Not	Not	Not	78	1.62	Not	Not	Not	Not	Not	Not	Not	Not	Not	Not	Not	Frequently	Frequently	Never	Never	Never	Always	Frequently	Not	14 Sep 20	29.7211	12a+	9	Not	Not	Not
30	4	Cusco	1161	Fem	75	4	Not	Yes	Not	Not	Not	Not	80	1.67	Not	Not	Not	Not	Not	Not	Not	Not	Not	Yes	Not	Frequently	Always	Never	Always	Never	Always	Always	Not	14 Sep 20	28.6851	12a+	6	Not	Not	Not
527	1	Cusco	45ANT03	Masc	88	3	Not	Not	Not	Not	Not	Not	78	1.6	Not	Not	Not	Not	Not	Not	Yes	Not	Yes	Not	Not	Sometimes	Sometimes	Sometimes	Never	Never	Frequently	Frequently	Not	20 Sep 20	30.4688	7-11a	7	Not	Not	Not
246	3	Periphery of Cusco	5562	Fem	49	3	Not	Not	Not	Not	Not	Not	55	1.55	Not	Not	Not	Not	Yes	Yes	Yes	Not	Yes	Not	Yes	Frequently	Always	Sometimes	Always	Never	Always	Frequently	Not	19 Sep 20	22.8928	7-11a	8	Not	Not	Not
133	1	Cusco	3114	Fem	31	5	Not	Not	Not	Not	Not	Not	50	1.53	Yes	Yes	Yes	Not	Not	Yes	Not	Not	Yes	Yes	Not	Frequently	Always	Sometimes	Always	Sometimes	Always	Always	Yes	14 Sep 20	21.3593	12a+	10	Not	Yes	Yes
517	4	Cusco	_	Fem	36	5	Not	Not	Not	Not	Not	Not	70	1.65	Not	Not	Not	Not	Not	Not	Not	Not	Not	Not	Not	Always	Always	Always	Always	Never	Always	Always	Not	20 Sep 20	25.7117	7-11a	8	Not	Yes	Not
623	1	Periphery of Cusco	25A34	Fem	51	2	Not	Not	Not	Not	Not	Not	63	1.55	Yes	Yes	Yes	Not	Not	Not	Yes	Not	Yes	Not	Not	Always	Always	Never	Always	Never	Always	Always	Yes	26 Sep 20	26.2227	7-11a	6	Not	Yes	Yes
117	4	Periphery of Cusco	4413	Fem	29	4	Not	Not	Not	Not	Not	Not	63	1.52	Not	Yes	Not	Not	Yes	Not	Not	Yes	Not	Not	Not	Always	Always	Never	Frequently	Never	Always	Always	Yes	14 Sep 20	27.268	7-11a	6	Not	Not	Not
34	3	Periphery of Cusco	3881	Fem	78	6	Not	Yes	Not	Not	Not	Not	78	1.56	Not	Not	Not	Not	Not	Not	Not	Not	Not	Not	Not	Frequently		Always	Sometimes		Frequently	Frequently	Not	14 Sep 20	32.0513	<7a	9	Not	Not	Not
607	3	Periphery of Cusco	29-JR-04	Masc	45	6	Not	Not	Not	Not	Not	Not	78	1.67	Not	Not	Yes	Not	Not	Not	Not	Not	Not	Not	Not	Always	Always	Sometimes	Sometimes	Never	Always	Always	Not	27 Sep 20	27.968	7-11a	6	Not	Yes	Yes
49	4	Cusco	3011	Masc	26	9	Not	Not	Not	Not	Not	Not	77	1.76	Yes	Yes	Yes	Not	Not	Yes	Not	Yes	Yes	Not	Not	Always	Always	Never	Always	Never	Always	Always	Not	14 Sep 20	24.8579	12a+	9	Yes	Not	Not
630	5	Periphery of Cusco	4413	Masc	62	7	Not	Not	Not	Not	Not	Not	72.5	1.6	Yes	Yes	Yes	Yes	Not	Yes	Not	Not	Yes	Yes	Not	Always	Always	Always	Sometimes	Never	Frequently	Always	Yes	26 Sep 20	28.3203	12a+	10	Yes	Yes	Yes
823	2	Cusco	45kg07	Fem	57	3	Not	Not	Not	Not	Not	Not	56	1.5	Not	Not	Not	Not	Not	Not	Not	Not	Not	Not	Not	Always	Always		Always	Always	Always	Always	Yes	27 Sep 20	24.8889	7-11a	7	Not	Not	Not
264	3	Periphery of Cusco	66061	Masc	42	4	Not	Not	Not	Not	Not	Not	95	1.8	Not	Not	Yes	Not	Yes	Yes	Yes	Not	Yes	Yes	Not		Always	Never	Never	Never	Always	Always	Yes	19 Sep 20	29.321	12a+	6	Not	Yes	Yes
395	8	Cusco	89	Masc	23	9	Not	Not	Not	Not	Not	Not	65	1.69	Not	Not	Not	Not	Not	Not	Not	Not	Not	Not	Not	Always	Always	Always	Sometimes	Sometimes	Always	Frequently	Yes	27 Sep 20	22.7583	7-11a	6	Not	Not	Not
276	4	Periphery of Cusco	66032	Masc	43	4	Not	Not	Not	Not	Not	Not	56	1.55	Not	Yes	Yes	Not	Not	Not	Not	Not	Not	Not	Not	Always	Always	Always	Never	Never	Always	Always	Yes	19 Sep 20	23.309	12a+	8	Not	Not	Yes
57	1	Periphery of Cusco	9653	Masc	55	7	Yes	Not	Yes	Not	Not	Not	59	1.59	Not	Yes	Not	Yes	Yes	Yes	Not	Not	Yes	Yes	Not								Yes	14 Sep 20	23.3377	<7a	7	Not	Yes	Yes
74	1	Periphery of Cusco	442A	Masc	66	6	Not	Not	Not	Not	Not	Not	76	1.7	Not	Not	Yes	Not	Yes	Yes	Yes	Not	Yes	Yes	Not	Sometimes	Always	Sometimes	Frequently	Never	Sometimes	Sometimes	Not	14 Sep 20	26.2976	12a+	7	Not	Yes	Yes
83	5	Periphery of Cusco	411A	Fem	30	6	Not	Not	Not	Not	Not	Not	56	1.54	Not	Not	Not	Not	Not	Not	Not	Not	Not	Not	Not	Frequently	Always	Sometimes	Frequently	Never	Always	Frequently	Not	14 Sep 20	23.6127	12a+	8	Not	Not	Yes
1015	1	Quillabamba	n8	Fem	29	6	Not	Not	Not	Not	Not	Not	48	1.52	Not	Not	Not	Not	Not	Not	Not	Not	Not	Not	Not	Frequently	Frequently	Sometimes	Frequently	Frequently	Frequently	Always	Not	14 Sep 20	20.7756	12a+	9	Not	Not	Not
57	7	Periphery of Cusco	9653	Masc	58	7	Not	Not	Not	Not	Not	Not	64	1.55	Not	Yes	Not	Not	Not	Not	Not	Not	Yes	Yes	Not	Always	Always	Never	Frequently	Sometimes	Always	Always	Not	14 Sep 20	26.6389	<7a	7	Not	Yes	Yes
212	2	Quillabamba	Q212	Fem	43	4	Not	Not	Not	Not	Not	Not	81	1.55	Not	Yes	Yes	Not	Not	Not	Not	Yes	Yes	Not	Not	Frequently	Always	Always	Never	Never	Always	Always	Not	14 Sep 20	33.7149	12a+	6	Not	Yes	Yes
35	1	Periphery of Cusco	3831	Fem	61	4	Yes	Not	Not	Not	Not	Not	85	1.67	Not	Not	Not	Not	Not	Not	Not	Yes	Yes	Not	Not	Always	Always	Frequently	Always	Never	Always	Always	Not	14 Sep 20	30.478	12a+	6	Not	Not	Not
367	6	Cusco	452B26	Masc	65	6	Not	Not	Not	Not	Not	Not	80	1.7	Yes	Yes	Not	Not	Not	Not	Not	Not	Not	Not	Not	Always	Always	Sometimes	Frequently	Never	Always	Always	Yes	26 Sep 20	27.6817	7-11a	9	Not	Yes	Yes
5	5	Periphery of Cusco	22222	Fem	19	5	Not	Not	Not	Not		Not	53	1.53	Yes	Yes	Not	Not	Yes	Not	Not	Not	Yes	Not	Yes	Always	Always		Sometimes	Never	Always	Always	Yes	14 Sep 20	22.6409	7-11a	6	Yes	Yes	Not
938	5	Quillabamba	47	Masc	56	9	Not	Not	Not	Not	Not	Not			Not	Not	Not	Not	Not	Not	Not	Not	Not	Not	Not	Always	Always	Never	Never	Never	Always	Always	Not	20 Sep 20		<7a	10	Not	Not	Not
744	5	Cusco	45JL04	Masc	31	5	Not	Not	Not	Not	Not	Not	88	1.7	Not	Not	Yes	Not	Not	Not	Not	Not	Not	Not	Not	Always	Always	Never		Never	Always	Always	Yes	27 Sep 20	30.4498	7-11a	7	Not	Yes	Yes
737	1	Cusco	45JL10	Fem	65	6	Yes	Not	Not	Not	Not	Not	75		Not	Not	Yes	Not	Yes	Not	Not	Not	Yes	Not	Not	Always	Frequently						Not	27 Sep 20		<7a	10	Not	Yes	Yes
822	4	Cusco	45kg06	Fem	20	5	Not	Not	Not	Not	Not	Not	55	1.6	Not	Not	Yes	Not	Not	Not	Yes	Not	Not	Yes	Not	Always	Always	Always	Always	Sometimes	Always	Always	Yes	27 Sep 20	21.4844	12a+	8	Not	Not	Not
609	4	Periphery of Cusco	25-A-20	Fem	39	5	Not	Not	Not	Not	Not	Not	62		Not	Not	Not	Not	Not	Not	Not	Not	Not	Not	Not	Always	Always		Always	Always	Always	Always	Yes	26 Sep 20		7-11a	7	Not	Not	Not
826	5	Cusco	45kg10	Masc	34	6	Not	Not	Not	Not	Not	Not	68	1.63	Not	Not	Not	Not	Not	Not	Not	Not	Not	Not	Not	Always	Always		Always	Sometimes	Always	Always	Yes	27 Sep 20	25.5937	12a+	10	Not	Yes	Yes
29	2	Periphery of Cusco	4411	Fem	34	4	Not	Not	Not	Not	Not	Not	49	1.55	Not	Not	Not	Not	Not	Not	Not	Not	Not	Not	Not	Always	Always	Never	Always	Never	Always	Always	Not	14 Sep 20	20.3954	7-11a	6	Not	Not	Not
630	4	Periphery of Cusco	4413	Fem	45	7	Not	Not	Not	Not	Not	Not	61	1.62	Yes	Not	Not	Not	Yes	Not	Not	Not	Yes	Yes	Yes	Always	Always	Always	Always	Sometimes	Always	Always	Yes	26 Sep 20	23.2434	12a+	10	Yes	Yes	Yes
264	2	Periphery of Cusco	66061	Fem	69	4	Yes	Not	Not	Not	Not	Not	64	1.55	Not	Not	Yes	Not	Yes	Yes	Yes	Not	Yes	Yes	Not	Always	Always	Always	Always	Always	Always	Always	Yes	19 Sep 20	26.6389	7-11a	6	Not	Yes	Yes
146	3	Cusco	89H	Fem	55	7	Not	Not	Not	Not	Not	Yes	95	1.65	Not	Not	Not	Not	Not	Not	Not	Not	Not	Not	Not	Always	Always	Never	Always	Never	Always	Always	Not	14 Sep 20	34.8944	7-11a	9	Not	Not	Not
123	2	Periphery of Cusco	9624	Masc	26	3	Not	Not	Not	Not	Not	Not	100	1.75	Yes	Not	Yes	Yes	Yes	Yes	Not	Yes	Yes	Yes	Yes	Frequently	Always	Never	Frequently	Sometimes	Frequently	Always	Yes	14 Sep 20	32.6531	12a+	6	Not	Not	Not
1010 - 428	1	Quillabamba	q2	Fem	40	6	Not	Not	Not	Not	Not	Not	56	1.5	Not	Not	Not	Not	Not	Not	Not	Not	Not	Not	Not	Frequently	Frequently	Sometimes	Frequently	Sometimes	Frequently	Always	Not	14 Sep 20	24.8889	12a+	7	Not	Yes	Not
146	6	Cusco	89H	Masc		7	Not	Not	Not	Not	Not	Not	90	1.75	Not	Not	Not	Not	Not	Not	Not	Not	Not	Not	Not	Always	Always	Never	Never	Never	Always	Always	Not	14 Sep 20	29.3878	<7a	9	Not	Not	Not
49	3	Cusco	3011	Fem	22	9	Not	Not	Not	Not	Not	Yes	50	1.54	Not	Not	Yes	Not	Not	Not	Not	Not	Not	Yes	Not	Frequently	Always	Never	Never	Sometimes	Always	Always	Not	14 Sep 20	21.0828	12a+	9	Yes	Not	Not
192	5	Quillabamba	192.1.10	Fem	18	6	Not	Not	Not	Not	Not	Not	54	1.65	Not	Not	Not	Not	Yes	Not	Not	Not	Yes	Not	Not	Always	Always	Sometimes	Never	Never	Always	Always	Not	14 Sep 20	19.8347	7-11a	6	Not	Yes	Yes
341	1	Periphery of Cusco	2507	Masc	21	2	Not	Not	Not	Not	Not	Not	65	1.64	Not	Not	Not	Not	Not	Not	Yes	Not	Yes	Not	Not	Frequently	Always	Never	Sometimes	Never	Frequently	Frequently	Not	25 Sep 20	24.1672	12a+	10	Not	Not	Not
145	3	Cusco	89G	Masc	63	6	Not	Not	Not	Not	Not	Not	70	1.58	Not	Not	Not	Not	Not	Not	Not	Not	Not	Not	Not	Always	Always	Sometimes	Always	Always	Always	Always	Not	14 Sep 20	28.0404	7-11a	7	Not	Not	Not
730	2	Cusco	45DR18	Masc	59	6	Not	Not	Not	Not	Not	Not	65	1.61	Not	Not	Not	Not	Not	Not	Not	Not	Not	Yes	Not	Always	Always	Never	Frequently	Never	Always	Always	Yes	27 Sep 20	25.0762	12a+	7	Not	Yes	Yes
391	1	Cusco	89	Fem	35	8	Not	Not	Not	Not	Not	Not	75	1.59	Not	Yes	Not	Not	Not	Not	Yes	Not	Yes	Not	Not	Always	Always		Always		Always	Always	Yes	27 Sep 20	29.6666	12a+	8	Not	Yes	Yes
146	4	Cusco	89H	Masc	21	7	Not	Not	Not	Not	Not	Not	60	1.7	Not	Not	Not	Not	Not	Not	Not	Not	Not	Not	Not	Always	Always	Sometimes	Always	Sometimes	Always	Always	Not	14 Sep 20	20.7613	<7a	9	Not	Not	Not
145	6	Cusco	89G	Fem	27	6	Not	Not	Not	Not	Not	Not	59	1.59	Not	Not	Not	Not	Not	Not	Not	Not	Not	Not	Not	Always	Always	Sometimes	Always	Always	Always	Always	Yes	14 Sep 20	23.3377	<7a	7	Not	Not	Not
1010 - 428	6	Quillabamba	q2	Fem	45	6	Not	Not	Not	Not	Not	Not	85	1.5	Not	Not	Not	Not	Not	Not	Not	Not	Not	Not	Not	Frequently	Frequently	Never	Never	Never	Frequently	Always	Yes	14 Sep 20	37.7778	12a+	7	Not	Yes	Not
615	2	Periphery of Cusco	25A26	Fem	67	3	Not	Not	Not	Not	Not	Not	70	1.56	Not	Yes	Yes	Not	Not	Not	Yes	Not	Not	Not	Not	Frequently	Frequently	Never	Sometimes	Never	Frequently	Frequently	Yes	26 Sep 20	28.764	<7a	10	Not	Yes	Yes
938	1	Quillabamba	47	Fem	18	9	Not	Not	Not	Not	Not	Not			Not	Not	Not	Not	Not	Not	Yes	Not	Yes	Not	Not	Always	Always	Never	Never	Never	Always	Always	Not	20 Sep 20			10	Not	Not	Not
1010 - 428	2	Quillabamba	q2	Masc	47	6	Not	Not	Not	Not	Not	Not	78	1.59	Not	Not	Not	Not	Not	Not	Not	Not	Not	Not	Not	Frequently	Frequently	Never	Never	Never	Frequently	Always	Yes	14 Sep 20	30.8532	<7a	7	Not	Yes	Not
154	8	Cusco	89P	Masc	24	8	Not	Not	Not	Not	Not	Not	76	1.6	Not	Not	Not	Not	Yes	Yes	Not	Not	Not	Not	Not	Always	Always	Sometimes	Always	Sometimes	Always	Always	Yes	14 Sep 20	29.6875	<7a	9	Not	Not	Not
144	6	Cusco	89F	Fem	62	6	Not	Not	Not	Not	Not	Not	80	1.71	Not	Not	Not	Yes	Yes	Not	Not	Yes	Yes	Not	Not	Always	Always	Never	Frequently	Never	Frequently	Always	Yes	14 Sep 20	27.3588	<7a	8	Not	Not	Not
61	1	Periphery of Cusco	22.1B	Masc	28	4	Not	Not	Not	Not	Not	Not	68	1.59	Yes	Yes	Yes	Not	Not	Not	Not	Not	Yes	Not	Not	Sometimes	Always	Sometimes	Never	Never	Always	Always	Not	14 Sep 20	26.8977	7-11a	8	Not	Not	Not
370	2	Periphery of Cusco	25A13	Fem	47	3	Not	Yes	Not	Not	Not	Not	60	1.68	Yes	Yes	Yes	Yes	Yes	Yes	Not	Yes	Yes	Yes	Not	Always	Always	Never	Sometimes	Sometimes	Always	Always	Yes	26 Sep 20	21.2585	7-11a	6	Not	Not	Not
76	3	Periphery of Cusco	423	Fem	23	5	Not	Not	Not	Not	Not	Not	47	1.55	Not	Not	Not	Not	Not	Not	Not	Not	Not	Not	Not	Always	Always	Never	Always	Never	Always	Always	Not	14 Sep 20	19.563	12a+	8	Not	Not	Not
142	2	Cusco	89D	Fem	46	4	Yes	Not	Not	Not	Not	Not	74	1.55	Not	Not	Not	Not	Not	Not	Not	Not	Not	Not	Not	Frequently	Frequently	Never	Never	Sometimes	Frequently	Frequently	Not	14 Sep 20	30.8012	7-11a	6	Not	Not	Not
212	3	Quillabamba	Q212	Fem	42	4	Yes	Not	Not	Not	Not	Not	66	1.55	Not	Not	Not	Not	Not	Not	Not	Not	Not	Not	Not	Always	Always	Always	Always	Never	Always	Always	Not	14 Sep 20	27.4714	12a+	6	Not	Yes	Yes
513	5	Cusco	513.1.10	Fem		5	Not	Not	Not	Not	Not	Not	45	1.4	Yes	Yes	Yes	Not	Not	Not	Not	Not	Yes	Not	Not	Always	Always	Always	Always	Always	Always	Always	Not	20 Sep 20	22.9592	7-11a	8	Not	Not	Yes
395	5	Cusco	89	Masc	18	9	Not	Not	Not	Not	Not	Not	55	1.65	Not	Not	Not	Not	Not	Not	Not	Not	Yes	Yes	Not	Always	Always	Sometimes	Sometimes	Never	Always	Frequently	Not	27 Sep 20	20.202	7-11a	6	Not	Not	Not
540	5	Cusco	45ER5	Masc	26	5	Not	Not	Not	Not	Not	Not	56	1.6	Not	Not	Not	Not	Not	Not	Not	Not	Not	Not	Not	Always	Always	Sometimes	Sometimes	Never	Always	Always	Yes	20 Sep 20	21.875		6	Not	Not	Not
378	4	Periphery of Cusco	25A10	Fem	25	4	Not	Not	Not	Not	Not	Not	72	1.6	Yes	Not	Not	Not	Yes	Yes	Not	Not	Yes	Yes	Not	Frequently	Sometimes	Never	Sometimes	Sometimes	Always	Always	Not	26 Sep 20	28.125	7-11a	8	Not	Not	Yes
350	4	Periphery of Cusco	29033	Fem	60	7	Not	Yes	Not	Not	Not	Not	59	1.6	Yes	Not	Not	Not	Not	Not	Not	Not	Yes	Not	Not	Always	Always	Always	Always	Never	Always	Always	Not	26 Sep 20	23.0469	12a+	8	Not	Not	Not
304	4	Cusco	45ER23	Fem	24	5	Not	Not	Not	Not	Not	Not	58	1.57	Not	Yes	Not	Not	Not	Yes	Not	Not	Not	Yes	Not	Always	Always	Sometimes		Never	Always		Yes	20 Sep 20	23.5304	12a+	8	Yes	Yes	Yes
262	2	Periphery of Cusco	77066	Masc	75	6	Not	Not	Not	Not	Not	Not	75	1.65	Not	Not	Not	Not	Not	Not	Not	Not	Not	Not	Not								Not	19 Sep 20	27.5482	12a+	7	Not	Not	Not
226	2	Periphery of Cusco	s-226	Masc	42	4	Not	Not	Not	Not	Not	Not	55	1.58	Yes	Yes	Yes	Not	Not	Yes	Yes	Yes	Yes	Yes	Not	Always	Always	Never	Always	Never	Always	Always	Not	18 Sep 20	22.0317	12a+	9	Not	Not	Not
938	7	Quillabamba	47	Masc	31	9	Not	Not	Not	Not	Not	Not			Not	Yes	Not	Not	Not	Not	Not	Not	Not	Yes	Not	Always	Always	Never	Never	Never	Always	Always	Not	20 Sep 20		12a+	10	Not	Not	Not
357	1	Cusco	452B16	Fem	55	4	Not	Not	Not	Not	Not	Not	69	1.65	Not	Not	Yes	Not	Not	Not	Not	Not	Not	Not	Not	Always	Always	Never	Frequently	Never	Always	Always	Yes	26 Sep 20	25.3443	12a+	8	Not	Yes	Yes
1017 - 437	5	Quillabamba	N9	Masc	29	7	Not	Not	Not	Not	Not	Not	60	1.49	Not	Not	Not	Not	Not	Not	Not	Not	Not	Not	Not	Frequently	Frequently	Never	Never	Never	Always	Frequently	Not	14 Sep 20	27.0258	7-11a	8	Not	Not	Not
1017 - 437	6	Quillabamba	N9	Fem	42	7	Not	Not	Not	Not	Not	Not	76	1.6	Not	Not	Not	Not	Not	Not	Not	Not	Not	Not	Not	Frequently	Frequently	Never	Never	Never	Always	Frequently	Yes	14 Sep 20	29.6875	12a+	8	Not	Not	Not
263	1	Periphery of Cusco	66103	Fem	56	8	Not	Yes	Not	Not	Not	Not	60	1.54	Not	Not	Not	Not	Not	Not	Not	Not	Yes	Not	Not	Always	Always	Always	Always	Always	Always	Always	Not	19 Sep 20	25.2994	12a+	10	Not	Yes	Yes
723	4	Cusco	45DR25	Masc	53	5	Not	Not	Not	Not	Not	Not	87	1.68	Yes	Not	Not	Not	Not	Not	Not	Not	Not	Not	Not	Always	Always	Never	Always	Never	Always	Always	Not	27 Sep 20	30.8248	7-11a	8	Not	Not	Not
517	1	Cusco	_	Masc	60	5	Not	Not	Not	Not	Not	Not	90	1.68	Not	Yes	Yes	Not	Yes	Not	Not	Not	Yes	Not	Yes	Frequently	Always	Never	Frequently	Never	Always	Frequently	Not	20 Sep 20	31.8878	<7a	8	Not	Yes	Not
144	4	Cusco	89F	Masc	19	6	Not	Not	Not	Not	Not	Not	73	1.73	Not	Not	Not	Not	Not	Not	Not	Not	Not	Not	Not	Always	Always	Never	Always	Never	Always	Always	Yes	14 Sep 20	24.3911	<7a	8	Not	Not	Not
523	1	Cusco	45 ANT 01	Masc	44	3	Not	Not	Not	Not	Not	Not	90	1.65	Not	Not	Yes	Not	Not	Not	Not	Not	Yes	Not	Not	Sometimes	Sometimes	Never	Sometimes	Never	Frequently	Frequently	Yes	20 Sep 20	33.0579	7-11a	7	Not	Not	Not
263	7	Periphery of Cusco	66103	Fem	29	8	Not	Not	Not	Not	Not	Not	83	1.55	Not	Not	Not	Not	Not	Not	Not	Not	Yes	Not	Not	Always	Always	Always	Always	Always	Always	Always	Not	19 Sep 20	34.5474	12a+	10	Not	Yes	Yes
708	4	Periphery of Cusco	45ME05B	Masc	23	5	Not	Not	Not	Not	Not	Not	63	1.6	Not	Not	Not	Not	Not	Not	Yes	Not	Yes	Not	Not	Frequently	Frequently	Never	Sometimes	Never	Always	Always	Yes	27 Sep 20	24.6094	12a+	8	Not	Not	Not
568	5	Periphery of Cusco	5351	Masc	42	5	Not	Not	Not	Not	Not	Not	82	1.73	Not	Yes	Not	Not	Not	Not	Not	Not	Yes	Not	Not	Always	Frequently	Frequently	Sometimes	Never	Always	Always	Not	20 Sep 20	27.3982	12a+	8	Not	Not	Yes
1015	3	Quillabamba	n8	Masc	54	6	Not	Not	Not	Not	Not	Not	85	1.55	Not	Not	Not	Not	Not	Not	Not	Not	Not	Not	Not	Frequently	Frequently	Never	Never	Never	Frequently	Frequently	Yes	14 Sep 20	35.3798	7-11a	9	Not	Not	Not
1019- 440	1	Quillabamba	NC12	Masc	59	5	Not	Not	Not	Not	Not	Not	80	1.65	Yes	Not	Yes	Not	Not	Yes	Not	Yes	Not	Not	Not	Always	Always	Sometimes	Sometimes	Sometimes	Frequently	Frequently	Yes	14 Sep 20	29.3848	12a+	10	Not	Yes	Yes
822	5	Cusco	45kg06	Fem	39	5	Not	Not	Not	Not	Not	Not	60	1.5	Not	Yes	Not	Not	Not	Not	Not	Yes	Yes	Not	Not	Always	Always	Always	Always	Sometimes	Always	Always	Not	27 Sep 20	26.6667	7-11a	8	Not	Not	Not
714	1	Periphery of Cusco	45ME11	Masc	36	2	Not	Not	Not	Not	Not	Not	95	1.7	Yes	Not	Not	Not	Not	Yes	Not	Not	Not	Not	Not	Frequently	Frequently	Sometimes	Sometimes	Never	Frequently	Frequently	Not	27 Sep 20	32.872	7-11a	6	Not	Not	Not
1019- 440	2	Quillabamba	NC12	Fem	50	5	Yes	Not	Not	Not	Not	Not	84	1.46	Yes	Not	Not	Not	Not	Yes	Not	Not	Yes	Not	Not	Frequently	Frequently	Never	Sometimes	Never	Sometimes	Frequently	Not	14 Sep 20	39.407	<7a	10	Not	Yes	Yes
823	1	Cusco	45kg07	Fem	66	3	Yes	Not	Not	Not	Not	Not	49	1.5	Not	Not	Not	Not	Not	Not	Not	Not	Not	Not	Not	Always	Always		Always		Always	Always	Yes	27 Sep 20	21.7778	7-11a	7	Not	Not	Not
299	4	Cusco	45ER23	Fem	28	5	Not	Not	Not	Not	Not	Not	63	1.54	Not	Not	Not	Not	Not	Not	Not	Not	Not	Not	Not	Always	Always	Never	Sometimes	Never	Always	Always	Yes	20 Sep 20	26.5643	7-11a	8	Not	Yes	Yes
350	6	Periphery of Cusco	29033	Fem	29	7	Not	Not	Not	Not	Not	Not	63	1.6	Not	Not	Not	Not	Not	Not	Not	Not	Yes	Not	Not	Always	Always	Sometimes	Never	Never	Always	Always	Not	26 Sep 20	24.6094	12a+	8	Not	Not	Not
263	5	Periphery of Cusco	66103	Masc	42	8	Not	Not	Not	Not	Not	Not	72	1.72	Not	Not	Yes	Not	Yes	Not	Yes	Not	Not	Not	Not	Frequently	Always	Always	Frequently	Frequently	Frequently	Always	Yes	19 Sep 20	24.3375	7-11a	10	Not	Yes	Yes
64	3	Periphery of Cusco	222	Fem	31	4	Not	Not	Not	Not	Not	Not	75	1.6	Yes	Not	Not	Not	Not	Not	Not	Not	Not	Not	Not	Always	Always	Never	Sometimes	Never	Always	Always	Not	14 Sep 20	29.2969	12a+	6	Not	Not	Not
378	1	Periphery of Cusco	25A10	Fem	19	4	Not	Not	Not	Not	Not	Not	48	1.6	Not	Not	Not	Not	Not	Not	Not	Not	Not	Not	Not	Always	Always	Never	Always	Never	Always	Always	Yes	26 Sep 20	18.75	12a+	8	Not	Not	Yes
116	4	Periphery of Cusco	3893	Masc	45	5	Not	Not	Not	Not	Not	Not	94	1.8	Not	Not	Not	Not	Not	Not	Not	Not	Yes	Not	Not	Frequently	Always	Always			Frequently	Frequently	Not	14 Sep 20	29.0124	12a+	9	Not	Not	Not
7	4	Periphery of Cusco	22231	Fem	85	5	Yes	Yes	Not	Not		Not	59	1.55	Yes	Not	Yes	Not	Yes	Not	Not	Not	Not	Not	Not	Always	Frequently	Never	Never	Never	Frequently	Frequently	Not	14 Sep 20	24.5577	12a+	8	Not	Not	Not
314	2	Cusco	45DR2	Fem	60	5	Not	Not	Not	Not	Not	Not	75	1.55	Not	Not	Yes	Not	Not	Yes	Not	Not	Not	Yes	Not	Always	Always	Always	Never	Never	Always	Always	Not	20 Sep 20	31.2175	7-11a	7	Not	Yes	Yes
815	3	Periphery of Cusco	4452	Fem	28	3	Not	Not	Not	Not	Not	Not	68	1.62	Not	Not	Not	Not	Not	Not	Not	Not	Not	Not	Not		Always						Not	26 Sep 20	25.9107	12a+	6	Not	Yes	Not
630	7	Periphery of Cusco	4413	Masc	57	7	Not	Not	Not	Not	Not	Not		1.65	Yes	Not	Yes	Yes	Yes	Yes	Not	Yes	Yes	Yes	Yes	Frequently	Always	Always	Frequently	Never	Frequently	Always	Yes	26 Sep 20		12a+	10	Yes	Yes	Yes
246	1	Periphery of Cusco	5562	Masc	24	3	Not	Not	Not	Not	Not	Not	60	1.78	Not	Not	Not	Not	Not	Not	Not	Not	Not	Not	Not	Frequently	Always	Never	Always	Never	Never	Always	Not	19 Sep 20	18.937	12a+	8	Not	Not	Not
1016 - 436	5	Quillabamba	N6	Masc	48	6	Not	Not	Not	Not	Not	Not	60	1.55	Not	Not	Not	Not	Not	Not	Not	Not	Not	Not	Not	Frequently	Frequently	Never	Never	Never	Always	Always	Not	14 Sep 20	24.974		8	Not	Not	Not
395	2	Cusco	89	Fem	28	9	Not	Not	Not	Not	Not	Not	55	1.52	Not	Not	Not	Not	Not	Not	Not	Not	Not	Not	Not	Always	Always		Sometimes	Never	Always	Always	Not	27 Sep 20	23.8054	12a+	6	Not	Not	Not
34	1	Periphery of Cusco	3881	Masc	22	6	Not	Not	Not	Not	Not	Not	65	1.6	Not	Not	Yes	Not	Not	Not	Yes	Not	Yes	Not	Not	Frequently	Always	Never	Frequently	Sometimes	Always	Always	Not	14 Sep 20	25.3906	12a+	9	Not	Not	Not
901	2	Quillabamba	10	Masc	51	3	Yes	Not	Not	Not	Not	Not	95	1.75	Not	Not	Not	Not	Not	Not	Not	Not	Not	Not	Not	Always	Always	Never	Never	Never	Always	Always	Yes	20 Sep 20	31.0204	12a+	6	Not	Not	Not
398	4	Cusco	89	Fem	49	5	Not	Not	Not	Not	Not	Not	60	1.57	Not	Not	Not	Not	Not	Not	Not	Not	Not	Not	Not	Always	Always	Frequently	Always	Sometimes	Always	Always	Not	27 Sep 20	24.3418	7-11a	6	Not	Not	Not
263	6	Periphery of Cusco	66103	Fem	76	8	Not	Yes	Not	Not	Not	Not	58	1.56	Yes	Not	Not	Not	Not	Not	Not	Not	Not	Not	Not	Always	Always	Sometimes	Frequently	Never	Always	Always	Not	19 Sep 20	23.833	7-11a	10	Not	Yes	Yes
5	1	Periphery of Cusco	22222	Masc	31	5	Not	Not	Not	Not	Not	Not	102	1.73	Yes	Yes	Yes	Not	Yes	Not	Yes	Yes	Yes	Not	Yes	Frequently	Always	Never	Never	Never	Always	Frequently	Yes	14 Sep 20	34.0807	12a+	6	Yes	Yes	Not
708	3	Periphery of Cusco	45ME05B	Fem	47	5	Not	Not	Not	Not	Not	Not	90	1.5	Not	Not	Yes	Not	Not	Yes	Yes	Not	Not	Not	Yes	Frequently	Frequently	Never	Sometimes	Never	Always	Frequently	Yes	27 Sep 20	40	<7a	8	Not	Not	Not
7	5	Periphery of Cusco	22231	Masc	80	5	Not	Not	Not	Not	Not	Yes	75	1.65	Yes	Not	Yes	Not	Not	Not	Not	Not	Not	Not	Not	Always	Frequently	Never	Never	Never	Always	Always	Not	14 Sep 20	27.5482	7-11a	8	Not	Not	Not
744	1	Cusco	45JL04	Fem	52	5	Not	Not	Not	Not	Not	Not	69	1.6	Not	Not	Yes	Not	Not	Not	Not	Not	Not	Yes	Not	Always	Always	Never	Frequently	Never	Always	Always	Yes	27 Sep 20	26.9531	7-11a	7	Not	Yes	Yes
66	3	Periphery of Cusco	223	Masc	25	5	Not	Not	Not	Not	Not	Not	68	1.7	Not	Not	Not	Not	Not	Not	Not	Not	Yes	Not	Not	Always	Always	Sometimes	Sometimes	Never	Always	Always	Not	14 Sep 20	23.5294	12a+	6	Not	Not	Not
395	1	Cusco	89	Masc	54	9	Not	Not	Not	Not	Not	Not		1.64	Not	Not	Yes	Not	Yes	Yes	Not	Not	Yes	Not	Not	Always	Always	Always	Always	Frequently	Frequently	Always	Not	27 Sep 20		12a+	6	Not	Not	Not
723	3	Cusco	45DR25	Fem	48	5	Not	Not	Not	Not	Not	Yes	85	1.65	Not	Not	Not	Not	Not	Not	Not	Not	Not	Not	Not	Always	Always	Frequently	Frequently	Never	Always	Always	Not	27 Sep 20	31.2213	7-11a	8	Not	Not	Not
145	4	Cusco	89G	Fem	55	6	Not	Not	Not	Not	Not	Not	67	1.62	Not	Not	Not	Not	Not	Not	Not	Not	Not	Not	Not	Always	Always	Never	Always	Never	Always	Always	Yes	14 Sep 20	25.5296	<7a	7	Not	Not	Not
606	2	Periphery of Cusco	29-JR-03	Fem	25	6	Not	Not	Not	Not	Not	Not	51	1.58	Not	Yes	Not	Not	Not	Not	Not	Not	Not	Not	Not	Always	Always		Frequently		Always	Always	Not	27 Sep 20	20.4294	12a+	10	Not	Not	Not
409	4	Periphery of Cusco	50KG1	Fem	18	4	Not	Not	Not	Not	Not	Not	60	1.65	Not	Not	Not	Not	Not	Not	Not	Not	Yes	Yes	Not	Always	Always	Sometimes	Sometimes	Never	Always	Always	Not	27 Sep 20	22.0386	12a+	6	Not	Not	Not
615	1	Periphery of Cusco	25A26	Fem	44	3	Not	Not	Not	Not	Not	Not	67	1.59	Not	Yes	Not	Not	Not	Not	Not	Not	Not	Not	Yes	Always	Frequently	Sometimes	Sometimes	Never	Frequently	Frequently	Yes	26 Sep 20	26.5021	12a+	10	Not	Yes	Yes
387b	1	Cusco	89	Masc	66	5	Not	Not	Not	Not	Not	Not	83	1.68	Not	Not	Not	Not	Not	Not	Not	Not	Not	Not	Not	Frequently	Always	Sometimes	Always	Sometimes	Always	Always	Yes	27 Sep 20	29.4076	7-11a	8	Not	Not	Not
1016 - 436	4	Quillabamba	N6	Fem	32	6	Not	Not	Not	Not	Not	Not	60	1.6	Not	Not	Not	Not	Not	Not	Not	Not	Not	Not	Not	Frequently	Frequently	Never	Never	Never	Always	Frequently	Not	14 Sep 20	23.4375	<7a	8	Not	Not	Not
801	4	Periphery of Cusco	4432	Masc	20	5	Not	Not	Not	Not	Not	Not	82	1.7	Not	Not	Not	Not	Yes	Not	Not	Not	Yes	Yes	Not	Frequently	Always	Frequently	Always	Never	Always	Always	Not	26 Sep 20	28.3737	7-11a	6	Not	Not	Not
411	3	Periphery of Cusco	50KG03	Masc	32	5	Not	Not	Not	Not	Not	Not	85	1.79	Not	Not	Not	Not	Not	Not	Not	Not	Yes	Not	Not	Frequently	Frequently	Sometimes	Sometimes	Never	Frequently	Frequently	Not	27 Sep 20	26.5285	12a+	9	Not	Not	Not
1022- 432	4	Quillabamba	N1	Masc	28	5	Not	Not	Not	Not	Not	Not	58	1.5	Not	Not	Not	Not	Not	Not	Not	Not	Not	Not	Not	Frequently	Frequently	Never	Never	Never	Frequently	Always	Not	14 Sep 20	25.7778	7-11a	8	Not	Yes	Not
357	4	Cusco	452B16	Masc	34	4	Not	Not	Not	Not	Not	Not	75	1.69	Not	Not	Yes	Not	Not	Not	Not	Not	Not	Not	Not	Always	Always	Sometimes	Never	Never	Always	Always	Yes	26 Sep 20	26.2596	12a+	8	Not	Yes	Yes
38	5	Periphery of Cusco	3862	Fem	32	5	Not	Not	Not	Not	Not	Not	63	1.53	Not	Yes	Yes	Not	Not	Not	Not	Not	Yes	Yes	Not	Always	Always	Never	Always	Never	Always	Always	Not	14 Sep 20	26.9127	12a+	8	Not	Yes	Yes
1010 - 428	5	Quillabamba	q2	Masc	39	6	Not	Not	Not	Not	Not	Not	80	1.51	Not	Not	Not	Not	Not	Not	Not	Not	Not	Not	Not	Frequently	Frequently	Never	Never	Never	Frequently	Always	Not	14 Sep 20	35.0862		7	Not	Yes	Not
810	3	Periphery of Cusco	4453	Fem	20	4	Not	Not	Not	Not	Not	Not	80	1.61	Not	Not	Not	Not	Yes	Not	Not	Not	Yes	Not	Not	Frequently	Frequently	Never	Frequently	Sometimes	Frequently	Frequently	Not	26 Sep 20	30.863	12a+	7	Not	Not	Not
123	1	Periphery of Cusco	9624	Fem	52	3	Not	Not	Not	Not	Not	Not	63		Not	Not	Not	Not	Not	Not	Not	Not	Not	Not	Not	Always	Always		Always		Always	Always	Not	14 Sep 20			6	Not	Not	Not
105	3	Cusco	3161	Masc	29	3	Not	Not	Not	Not	Not	Not	64	1.69	Yes	Yes	Not	Not	Not	Yes	Yes	Not	Not	Not	Not	Always	Always	Sometimes	Sometimes	Never	Frequently	Frequently	Yes	14 Sep 20	22.4082	12a+	6	Not	Not	Not
20	2	Periphery of Cusco	55	Masc	30	3	Not	Not	Not	Not	Not	Not	102	1.86	Not	Not	Not	Not	Not	Not	Not	Not	Not	Not	Not	Frequently	Frequently	Frequently	Frequently	Never	Frequently	Frequently	Not	14 Sep 20	29.4832	12a+	8	Not	Not	Not
806	1	Periphery of Cusco	4474	Masc	78	2	Not	Not	Not	Not	Not	Not	51	1.56	Not	Not	Not	Not	Not	Not	Not	Not	Not	Not	Not	Always	Always	Never	Always	Never	Always	Always	Not	26 Sep 20	20.9566	12a+	6	Not	Not	Not
1018- 439	1	Quillabamba	N11	Fem	28	6	Not	Not	Not	Not	Not	Not	54	1.62	Not	Not	Not	Not	Not	Not	Not	Not	Not	Not	Not	Frequently	Frequently	Sometimes	Frequently	Frequently	Always	Always	Not	14 Sep 20	20.5761	12a+	6	Not	Yes	Yes
357	2	Cusco	452B16	Fem	20	4	Not	Not	Not	Not	Not	Not	59	1.6	Not	Not	Yes	Not	Not	Not	Not	Yes	Yes	Not	Not	Always	Always	Never	Frequently	Never	Always	Always	Yes	26 Sep 20	23.0469	12a+	8	Not	Yes	Yes
35	4	Periphery of Cusco	3831	Fem	35	4	Not	Not	Not	Not	Not	Not	62	1.6	Yes	Not	Yes	Yes	Not	Yes	Not	Yes	Yes	Yes	Yes	Always	Always	Always	Always	Never	Always	Always	Yes	14 Sep 20	24.2188	12a+	6	Not	Not	Not
252	2	Periphery of Cusco	62141	Fem	19	2	Not	Not	Not	Not	Not	Not	60	1.6	Yes	Yes	Not	Not	Yes	Yes	Yes	Yes	Yes	Not	Not	Always	Always	Never	Sometimes	Never	Always	Always	Not	19 Sep 20	23.4375	12a+	7	Not	Not	Not
938	9	Quillabamba	47	Fem	27	9	Not	Not	Not	Not	Not	Not			Not	Yes	Yes	Not	Not	Yes	Yes	Not	Yes	Not	Not	Always	Always	Never	Never	Never	Always	Always	Yes	20 Sep 20		12a+	10	Not	Not	Not
347	1	Periphery of Cusco	2516	Fem	55	1	Not	Not	Not	Not	Not	Not	60	1.5	Not	Not	Not	Not	Yes	Not	Not	Not	Not	Not	Not	Frequently	Never	Sometimes	Sometimes	Never	Frequently	Frequently	Yes	25 Sep 20	26.6667	<7a	6	Not	Not	Not
395	4	Cusco	89	Masc	25	9	Not	Not	Not	Not	Not	Not	74		Not	Not	Not	Not	Not	Not	Not	Not	Not	Not	Not	Frequently	Always	Frequently	Always	Sometimes	Always	Always	Not	27 Sep 20		12a+	6	Not	Not	Not
540	3	Cusco	45ER5	Fem	47	5	Not	Not	Not	Not	Not	Not	65	1.51	Yes	Yes	Yes	Yes	Not	Yes	Not	Yes	Yes	Yes	Yes	Always	Always	Sometimes	Sometimes	Never	Never	Always	Yes	20 Sep 20	28.5075	12a+	6	Not	Not	Not
408	4	Periphery of Cusco	50ME08	Fem	38	7	Not	Not	Not	Not	Not	Not	85	1.72	Not	Not	Not	Not	Not	Not	Not	Not	Not	Not	Not	Frequently	Frequently	Never	Sometimes	Never	Frequently	Frequently	Yes	27 Sep 20	28.7318	12a+	9	Not	Not	Not
146	5	Cusco	89H	Fem	30	7	Not	Not	Not	Not	Not	Not	68	1.75	Not	Not	Not	Not	Not	Not	Not	Not	Not	Not	Not	Always	Always	Frequently	Always	Always	Always	Always	Not	14 Sep 20	22.2041	<7a	9	Not	Not	Not
408	1	Periphery of Cusco	50ME08	Masc	40	7	Not	Not	Not	Not	Not	Not	90	1.75	Not	Not	Not	Not	Not	Not	Not	Not	Yes	Not	Not	Frequently	Frequently	Never	Never	Never	Frequently	Frequently	Yes	27 Sep 20	29.3878	12a+	9	Not	Not	Not
391	2	Cusco	89	Fem	55	8	Not	Not	Not	Not	Not	Not	65	1.5	Yes	Yes	Yes	Not	Not	Not	Not	Not	Yes	Not	Not	Always	Always	Always	Always	Sometimes	Frequently	Always	Not	27 Sep 20	28.8889	<7a	8	Not	Yes	Yes
285	2	Periphery of Cusco	1712B	Masc	23	2	Not	Not	Not	Not	Not	Not	74	1.72	Yes	Not	Not	Not	Not	Not	Not	Not	Not	Not	Not	Always	Always	Frequently	Never	Always	Always	Always	Yes	19 Sep 20	25.0135	12a+	10		Not	Not
145	1	Cusco	89G	Fem	34	6	Not	Not	Not	Not	Not	Not	62	1.49	Not	Not	Not	Not	Not	Not	Not	Not	Not	Not	Not								Yes	14 Sep 20	27.9267	<7a	7	Not	Not	Not
408	6	Periphery of Cusco	50ME08	Masc	89	7	Not	Not	Not	Not	Not	Not	70	1.65	Not	Not	Not	Not	Not	Not	Not	Not	Not	Not	Not	Frequently	Frequently	Never	Sometimes	Never	Frequently	Frequently	Not	27 Sep 20	25.7117		9	Not	Not	Not
744	3	Cusco	45JL04	Masc	59	5	Not	Not	Not	Not	Not	Not	80	1.58	Not	Yes	Not	Not	Not	Not	Not	Not	Not	Not	Not		Always		Always		Always		Not	27 Sep 20	32.0461	7-11a	7	Not	Yes	Yes
630	3	Periphery of Cusco	4413	Fem	53	7	Not	Not	Not	Not	Not	Not	53	1.6	Not	Yes	Not	Yes	Not	Not	Not	Yes	Yes	Not	Yes	Frequently	Always	Always	Sometimes	Never	Frequently	Always	Yes	26 Sep 20	20.7031	12a+	10	Yes	Yes	Yes
271	3	Periphery of Cusco	66063	Fem	33	5	Not	Not	Not	Not	Not	Not	70	1.59	Not	Yes	Not	Not	Not	Not	Not	Not	Yes	Not	Not	Frequently	Always				Always	Always	Yes	19 Sep 20	27.6888	12a+	7	Not	Not	Yes
117	2	Periphery of Cusco	4413	Fem	67	4	Not	Not	Not	Not	Not	Not	83	1.56	Not	Not	Not	Not	Not	Not	Not	Not	Yes	Not	Not	Always	Sometimes	Never	Never	Never	Always	Always	Yes	14 Sep 20	34.1058	<7a	6	Not	Not	Not
540	4	Cusco	45ER5	Masc	33	5	Not	Not	Not	Not	Not	Not	75	1.6	Not	Not	Not	Not	Not	Not	Not	Not	Not	Not	Not	Always	Always	Never	Sometimes	Never	Always	Always	Not	20 Sep 20	29.2969	7-11a	6	Not	Not	Not
1017 - 437	3	Quillabamba	N9	Masc	85	7	Not	Not	Not	Not	Not	Not	58	1.5	Not	Not	Not	Not	Not	Not	Not	Not	Not	Not	Not	Frequently	Frequently	Never	Never	Never	Sometimes	Sometimes	Yes	14 Sep 20	25.7778	<7a	8	Not	Not	Not
367	2	Cusco	452B26	Fem	62	6	Not	Not	Not	Not	Not	Not	62	1.45	Not	Not	Not	Not	Not	Not	Not	Not	Not	Not	Not	Always	Always	Frequently	Frequently	Never	Always	Always	Not	26 Sep 20	29.4887	12a+	9	Not	Yes	Yes
506	3	Cusco	21roc02	Masc	28	3	Not	Not	Not	Not		Not	67	1.54	Not	Not	Not	Not	Not	Not	Not	Not	Not	Not	Not	Always	Always	Never	Always	Never	Always	Always	Not	20 Sep 20	28.251	12a+	6	Not	Not	Not
154	5	Cusco	89P	Fem	42	8	Not	Not	Not	Not	Not	Not	65	1.53	Not	Not	Not	Not	Not	Not	Not	Not	Not	Not	Not	Always	Always	Sometimes	Always	Sometimes	Always	Always	Yes	14 Sep 20	27.7671	<7a	9	Not	Not	Not
192	2	Quillabamba	192.1.10	Fem	39	6	Not	Not	Not	Not	Not	Not	62	1.57	Not	Not	Not	Not	Not	Not	Not	Not	Not	Not	Not	Always	Always	Never	Frequently	Never	Always	Always	Not	14 Sep 20	25.1532	7-11a	6	Not	Yes	Yes
938	4	Quillabamba	47	Masc	23	9	Not	Not	Not	Not	Not	Not			Yes	Yes	Yes	Not	Yes	Yes	Yes	Yes	Yes	Yes	Yes	Always	Always	Never	Never	Never	Always	Always	Not	20 Sep 20		12a+	10	Not	Not	Not
350	3	Periphery of Cusco	29033	Masc	21	7	Not	Not	Not	Not	Not	Not	64	1.77	Not	Not	Not	Not	Not	Not	Not	Not	Not	Yes	Not	Frequently	Always	Frequently	Never	Never	Always	Always	Not	26 Sep 20	20.4284	12a+	8	Not	Not	Not
37	1	Periphery of Cusco	3863	Masc	81	5	Not	Not	Yes	Not	Not	Not	58	1.57	Not	Not	Yes	Not	Not	Yes	Not	Yes	Not	Not	Not	Sometimes	Sometimes	Sometimes	Never	Never	Sometimes	Sometimes	Not	14 Sep 20	23.5304	<7a	8	Not	Not	Not
192	3	Quillabamba	192.1.10	Fem	77	6	Yes	Yes	Not	Not	Not	Yes	52	1.5	Yes	Not	Not	Not	Not	Not	Not	Not	Yes	Not	Not	Frequently	Always	Never	Sometimes	Never		Always	Not	14 Sep 20	23.1111	<7a	6	Not	Yes	Yes
314	5	Cusco	45DR2	Masc	40	5	Not	Not	Not	Not	Not	Not	74	1.66	Not	Yes	Not	Not	Not	Not	Not	Not	Yes	Not	Not	Frequently	Always	Never	Never	Sometimes	Always	Always	Not	20 Sep 20	26.8544	12a+	7	Not	Yes	Yes
630	1	Periphery of Cusco	4413	Fem	28	7	Not	Not	Not	Not	Not	Not	43	1.53	Yes	Yes	Yes	Not	Yes	Yes	Not	Not	Yes	Yes	Not	Always	Always	Never	Sometimes	Never	Always	Always	Not	26 Sep 20	18.369	12a+	10	Yes	Yes	Yes
395	9	Cusco	89	Fem	24	9	Not	Not	Not	Not	Not	Not	56	1.58	Not	Not	Not	Not	Not	Not	Not	Not	Not	Not	Not	Always	Always	Always	Sometimes	Never	Always	Always	Yes	27 Sep 20	22.4323	12a+	6	Not	Not	Not
7	1	Periphery of Cusco	22231	Fem	55	5	Not	Not	Not	Not	Not	Not	62	1.64	Not	Yes	Not	Not	Not	Not	Not	Not	Yes	Not	Not	Always	Always	Never	Frequently	Never	Frequently	Always	Not	14 Sep 20	23.0517	12a+	8	Not	Not	Not
513	4	Cusco	513.1.10	Masc	33	5	Not	Not	Not	Not	Not	Not	65	1.5	Not	Not	Not	Not	Not	Not	Yes	Not	Not	Not	Not	Always	Always		Always		Always		Not	20 Sep 20	28.8889	7-11a	8	Not	Not	Yes
29	1	Periphery of Cusco	4411	Masc	38	4	Not	Not	Not	Not	Not	Not	68	1.7	Not	Not	Not	Not	Not	Not	Not	Not	Not	Not	Not	Always	Always	Never	Sometimes	Never	Always	Always	Not	14 Sep 20	23.5294	12a+	6	Not	Not	Not
1010 - 428	3	Quillabamba	q2	Fem	65	6	Not	Not	Not	Not	Not	Not	65	1.5	Not	Not	Not	Not	Not	Not	Not	Not	Not	Not	Not	Frequently	Frequently	Never	Never	Never	Frequently	Always	Not	14 Sep 20	28.8889	<7a	7	Not	Yes	Not
617	1	Periphery of Cusco	23A28	Masc	28	3	Not	Not	Not	Not	Not	Not	80	1.8	Yes	Not	Not	Not	Not	Yes	Yes	Not	Yes	Not	Not	Always	Always	Sometimes	Sometimes	Sometimes	Always	Always	Yes	26 Sep 20	24.6914	12a+	9	Not	Not	Not
519	3	Cusco	_	Masc	18	6	Not	Not	Not	Not	Not	Not		1.71	Not	Not	Not	Not	Not	Not	Not	Not	Not	Not	Not	Always	Always				Always	Always	Not	20 Sep 20			8	Yes	Yes	Not
519	2	Cusco	_	Fem	39	6	Not	Not	Not	Not	Not	Not	63	1.6	Not	Yes	Not	Not	Yes	Not	Not	Not	Yes	Not	Not	Always	Always	Never		Never	Always	Always	Not	20 Sep 20	24.6094	7-11a	8	Yes	Yes	Not
568	1	Periphery of Cusco	5351	Fem	50	5	Not	Not	Not	Not	Not	Not	71	1.58	Yes	Not	Not	Not	Not	Yes	Yes	Yes	Yes	Yes	Not	Always	Always	Sometimes	Sometimes	Never	Always	Always	Not	20 Sep 20	28.441	12a+	8	Not	Not	Yes
815	2	Periphery of Cusco	4452	Fem	22	3	Not	Not	Not	Not	Not	Not	50	1.62	Not	Not	Not	Not	Yes	Not	Not	Not	Not	Not	Not	Always	Always	Sometimes	Always	Never	Always	Always	Yes	26 Sep 20	19.052	12a+	6	Not	Yes	Not
142	1	Cusco	89D	Masc	56	4	Not	Not	Not	Not	Not	Not	74	1.56	Not	Not	Not	Not	Not	Not	Not	Yes	Not	Not	Not	Always	Always	Never	Frequently	Sometimes	Sometimes	Always	Yes	14 Sep 20	30.4076	12a+	6	Not	Not	Not
7	3	Periphery of Cusco	22231	Fem	19	5	Not	Not	Not	Not	Not	Not	59	1.63	Not	Yes	Not	Not	Not	Not	Yes	Yes	Yes	Not	Not	Frequently	Always	Never	Never	Never	Always	Frequently	Not	14 Sep 20	22.2063	12a+	8	Not	Not	Not
298	4	Cusco	45DR4	Fem	31	4	Not	Not	Not	Not	Not	Not	60	1.5	Not	Not	Not	Not	Not	Not	Not	Not	Not	Not	Not	Always	Always		Always	Never	Always	Always	Not	20 Sep 20	26.6667	12a+	9	Not	Not	Yes
74	5	Periphery of Cusco	442A	Fem	27	6	Not	Not	Not	Not	Not	Not	54		Not	Not	Not	Not	Not	Not	Not	Not	Not	Not	Not	Sometimes	Frequently	Frequently	Sometimes	Frequently	Frequently	Frequently	Not	14 Sep 20		12a+	7	Not	Yes	Yes
398	5	Cusco	89	Fem	81	5	Not	Not	Not	Not	Not	Not	60	1.52	Not	Not	Not	Not	Not	Not	Not	Not	Not	Not	Not	Always	Always	Always	Always	Always	Always	Always	Not	27 Sep 20	25.9695	<7a	6	Not	Not	Not
569	4	Periphery of Cusco	5261	Fem	74	5	Not	Not	Not	Not	Not	Not	60	1.5	Yes	Yes	Yes	Yes	Yes	Yes	Yes	Not	Yes	Yes	Yes	Never	Always	Never	Never	Never	Always	Always	Yes	20 Sep 20	26.6667	<7a	7	Not	Not	Yes
314	3	Cusco	45DR2	Fem	36	5	Not	Not	Not	Not	Not	Not	60	1.6	Yes	Yes	Not	Not	Yes	Yes	Not	Not	Yes	Yes	Not	Always	Always	Always	Sometimes	Sometimes	Always	Always	Not	20 Sep 20	23.4375	12a+	7	Not	Yes	Yes
254	4	Periphery of Cusco	1722	Fem	58	5	Not	Not	Not	Not	Not	Not	74	1.55	Not	Not	Not	Not	Not	Not	Not	Not	Yes	Not	Not	Always	Always	Sometimes	Sometimes	Never	Always	Always	Not	19 Sep 20	30.8012	12a+	7	Not	Not	Not
1015	5	Quillabamba	n8	Masc	29	6	Not	Not	Not	Not	Not	Not	65	1.6	Not	Not	Not	Not	Not	Not	Not	Not	Not	Not	Not	Frequently	Frequently	Never	Never	Never	Frequently	Always	Not	14 Sep 20	25.3906		9	Not	Not	Not
94	4	Periphery of Cusco	22253	Fem	36	5	Not	Not	Not	Not	Not	Not	60	1.53	Not	Not	Not	Not	Not	Not	Not	Not	Not	Not	Not	Frequently	Frequently	Never	Frequently	Never	Frequently	Frequently	Yes	14 Sep 20	25.6312	12a+	6		Not	Not
357	3	Cusco	452B16	Masc	48	4	Not	Not	Not	Not	Not	Not	82	1.63	Not	Not	Not	Not	Not	Not	Not	Not	Not	Not	Not	Always	Always	Sometimes	Frequently	Never	Always	Always	Yes	26 Sep 20	30.863	12a+	8	Not	Yes	Yes
387b	3	Cusco	89	Masc	46	5	Not	Yes	Not	Not	Not	Not	81	1.52	Not	Not	Not	Not	Not	Not	Not	Not	Yes	Not	Not	Always	Always		Always		Always	Always	Not	27 Sep 20	35.0589		8	Not	Not	Not
183	2	Quillabamba	4	Fem	24	2	Not	Not	Not	Not	Not	Not	57	1.58	Yes	Yes	Not	Not	Not	Not	Yes	Not	Not	Not	Not	Sometimes	Always	Sometimes	Never	Never	Always	Always	Yes	14 Sep 20	22.8329	12a+	7	Not	Yes	Yes
411	2	Periphery of Cusco	50KG03	Masc	23	5	Not	Not	Not	Not	Not	Not	64	1.6	Not	Not	Not	Not	Not	Not	Not	Not	Yes	Yes	Not	Always	Always	Sometimes	Sometimes	Never	Always	Always	Yes	27 Sep 20	25	12a+	9	Not	Not	Not
58	2	Periphery of Cusco	9622	Fem	38	4	Not	Not	Not	Not	Not	Not	65	1.55	Not	Not	Not	Not	Not	Not	Not	Not	Yes	Not	Not	Frequently	Always		Sometimes		Always	Always	Not	14 Sep 20	27.0552	12a+	6	Not	Not	Not
527	2	Cusco	45ANT03	Fem	41	3	Not	Not	Not	Not	Not	Not	69	1.55	Not	Not	Not	Not	Not	Not	Not	Not	Yes	Not	Not	Frequently	Always	Never	Sometimes	Sometimes	Always	Frequently	Not	20 Sep 20	28.7201	12a+	7	Not	Not	Not
37	4	Periphery of Cusco	3863	Fem	23	5	Not	Not	Yes	Not	Not	Yes	50	1.5	Yes	Not	Not	Yes	Not	Not	Not	Not	Not	Not	Not	Sometimes	Frequently	Sometimes	Sometimes	Sometimes	Always	Frequently	Not	14 Sep 20	22.2222	12a+	8	Not	Not	Not
34	4	Periphery of Cusco	3881	Fem	40	6	Not	Not	Not	Not	Not	Not	63	1.56	Not	Not	Not	Not	Not	Not	Not	Yes	Not	Not	Not	Frequently	Always				Frequently	Frequently	Yes	14 Sep 20	25.8876	12a+	9	Not	Not	Not
609	5	Periphery of Cusco	25-A-20	Masc		5	Not	Not	Not	Not	Not	Not	60	1.7	Not	Not	Not	Not	Not	Not	Not	Not	Not	Not	Not	Frequently	Frequently	Never	Never	Never	Always	Always	Yes	26 Sep 20	20.7613	7-11a	7	Not	Not	Not
409	2	Periphery of Cusco	50KG1	Fem	47	4	Not	Not	Not	Not	Not	Not	64	1.54	Not	Not	Not	Not	Not	Not	Not	Not	Not	Not	Not	Always	Always	Never	Sometimes	Never	Always	Always	Not	27 Sep 20	26.986	7-11a	6	Not	Not	Not
804	1	Periphery of Cusco	4434	Fem	39	2	Not	Not	Not	Not	Not	Not	67	1.65	Not	Not	Not	Not	Not	Not	Not	Yes	Not	Not	Not	Always	Always	Never	Always	Never	Always	Always	Not	26 Sep 20	24.6097	12a+	6	Not	Not	Not
387b	2	Cusco	89	Masc	34	5	Not	Not	Not	Not	Not	Not	75	1.72	Not	Not	Not	Not	Not	Not	Not	Not	Not	Not	Not	Always	Always	Sometimes	Always	Sometimes	Always	Always	Yes	27 Sep 20	25.3515	12a+	8	Not	Not	Not
272	3	Periphery of Cusco	77021	Fem	50	3	Not	Not	Not	Yes	Not	Not	68	1.64	Not	Not	Not	Not	Not	Not	Not	Not	Not	Not	Not	Always	Always	Never	Always	Never	Always	Always	Yes	19 Sep 20	25.2826	12a+	6	Yes	Yes	Yes
271	1	Periphery of Cusco	66063	Fem	78	5	Yes	Yes	Not	Not	Not	Not	60	1.5	Yes	Not	Yes	Not	Not	Not	Not	Not	Yes	Not	Not		Always				Always	Always	Yes	19 Sep 20	26.6667	<7a	7	Not	Not	Yes
1014- 433	3	Quillabamba	N2	Fem	55	5	Not	Not	Not	Not	Not	Not			Not	Not	Not	Not	Not	Not	Not	Not	Not	Not	Not	Frequently	Frequently	Never	Never	Never	Frequently	Frequently	Yes	14 Sep 20		7-11a	7	Not	Yes	Not
609	3	Periphery of Cusco	25-A-20	Masc	71	5	Not	Not	Not	Not	Not	Not	58	1.52	Yes	Not	Yes	Not	Yes	Yes	Not	Yes	Yes	Yes	Not	Always	Always	Never	Sometimes	Never	Always	Always	Yes	26 Sep 20	25.1039	7-11a	7	Not	Not	Not
272	1	Periphery of Cusco	77021	Masc	24	3	Not	Not	Not	Not	Not	Not	71	1.76	Yes	Yes	Not	Not	Not	Not	Not	Not	Yes	Not	Not	Always	Always	Never	Never	Never	Always	Always	Yes	19 Sep 20	22.921	12a+	6	Yes	Yes	Yes
821	1	Cusco	45kg05	Masc	78	3	Not	Not	Not	Not	Not	Not	58	1.59	Yes	Yes	Yes	Not	Yes	Yes	Not	Yes	Yes	Yes	Not	Always	Frequently	Never	Sometimes	Sometimes	Always	Frequently	Not	27 Sep 20	22.9421	12a+	7	Not	Not	Not
382	2	Periphery of Cusco	25A02	Fem	28	2	Not	Not	Not	Not	Not	Not	48	1.53	Not	Not	Not	Not	Not	Not	Not	Not	Not	Not	Not	Always	Always	Never	Never	Never	Always	Always	Not	26 Sep 20	20.5049	12a+	8	Not	Not	Not
183	1	Quillabamba	4	Fem	65	2	Not	Yes	Not	Not	Not	Not	75	1.6	Not	Not	Yes	Not	Not	Not	Not	Not	Yes	Not	Not	Always	Always	Never	Always	Never	Always	Always	Not	14 Sep 20	29.2969	7-11a	7	Not	Yes	Yes
568	3	Periphery of Cusco	5351	Fem	32	5	Not	Not	Not	Not	Not	Not	69	1.5	Not	Yes	Not	Not	Yes	Yes	Yes	Yes	Yes	Yes	Not	Frequently	Always	Sometimes	Sometimes	Never	Frequently	Always	Not	20 Sep 20	30.6667	12a+	8	Not	Not	Yes
5	3	Periphery of Cusco	22222	Fem	65	5	Not	Not	Not	Not	Not	Not	68	1.69	Yes	Not	Yes	Not	Yes	Not	Not	Not	Yes	Not	Not	Always	Always	Never	Sometimes	Never	Always	Frequently	Yes	14 Sep 20	23.8087	12a+	6	Yes	Yes	Not
630	6	Periphery of Cusco	4413	Masc	29	7	Not	Not	Not	Not	Not	Not	65	1.7	Not	Not	Not	Yes	Yes	Yes	Not	Yes	Yes	Yes	Yes	Always	Always	Always	Sometimes	Never	Frequently	Always	Yes	26 Sep 20	22.4914	12a+	10	Yes	Yes	Yes
22	4	Periphery of Cusco	493A1	Fem	19	4	Not	Not	Not	Not	Not	Not	70	1.63	Not	Yes	Not	Yes	Yes	Not	Not	Not	Yes	Not	Yes	Always	Always	Sometimes	Sometimes	Sometimes	Frequently	Frequently	Yes	14 Sep 20	26.3465	12a+	6	Not	Yes	Yes
49	5	Cusco	3011	Fem	30	9	Not	Not	Not	Not	Not	Not	72	1.71	Not	Yes	Not	Not	Not	Not	Not	Not	Not	Not	Not	Always	Always	Never	Always	Never	Always	Always	Not	14 Sep 20	24.623	12a+	9	Yes	Not	Not
276	1	Periphery of Cusco	66032	Fem	61	4	Yes	Not	Not	Not	Not	Not	50	1.5	Not	Not	Not	Not	Yes	Not	Not	Yes	Not	Not	Not	Frequently	Always	Never	Frequently	Sometimes	Always	Always	Not	19 Sep 20	22.2222	12a+	8	Not	Not	Yes
154	1	Cusco	89P	Fem	49	8	Not	Not	Not	Not	Not	Not	60	1.5	Not	Not	Not	Not	Not	Not	Not	Not	Not	Not	Not	Always	Always	Sometimes	Always	Sometimes	Always	Always	Yes	14 Sep 20	26.6667	<7a	9	Not	Not	Not
609	1	Periphery of Cusco	25-A-20	Masc	22	5	Not	Not	Not	Not	Not	Not	63	1.7	Not	Not	Not	Not	Not	Not	Not	Not	Not	Not	Not	Always	Always	Never	Sometimes	Frequently	Always	Always	Yes	26 Sep 20	21.7993	12a+	7	Not	Not	Not
737	6	Cusco	45JL10	Masc	22	6	Not	Not	Not	Not	Not	Not	56	1.68	Not	Not	Not	Not	Not	Yes	Not	Not	Yes	Not	Not	Always	Always	Never	Frequently	Never	Always	Always	Yes	27 Sep 20	19.8413	12a+	10	Not	Yes	Yes
74	6	Periphery of Cusco	442A	Fem	80	6	Yes	Yes	Not	Not	Not	Not	90	1.63	Not	Not	Not	Not	Not	Not	Not	Not	Not	Not	Not	Sometimes	Sometimes	Sometimes	Sometimes	Never	Always	Always	Not	14 Sep 20	33.8741	7-11a	7	Not	Yes	Yes
705	3	Cusco	45ME15	Masc	50	3	Not	Not	Not	Not	Not	Not	78	1.7	Not	Yes	Yes	Not	Yes	Yes	Yes	Not	Yes	Not	Not	Frequently	Frequently	Never	Sometimes	Sometimes	Frequently	Frequently	Yes	27 Sep 20	26.9896	12a+	7	Not	Not	Not
144	5	Cusco	89F	Fem	52	6	Not	Not	Not	Not	Not	Not	57	1.5	Not	Not	Not	Not	Not	Yes	Not	Not	Yes	Yes	Yes	Always	Always	Frequently	Always	Never	Always	Always	Yes	14 Sep 20	25.3333	<7a	8	Not	Not	Not
308	2	Cusco	45ER17	Masc	55	2	Not	Not	Not	Not	Not	Not	60	1.65	Not	Not	Not	Not	Not	Not	Not	Not	Not	Not	Not	Always	Always	Sometimes	Sometimes	Never	Always	Always	Not	20 Sep 20	22.0386	12a+	8	Not	Not	Not
744	2	Cusco	45JL04	Masc	28	5	Not	Not	Not	Not	Not	Not	87	1.83	Not	Not	Not	Not	Not	Not	Not	Not	Not	Not	Not	Always	Always		Sometimes	Never	Always	Always	Not	27 Sep 20	25.9787	12a+	7	Not	Yes	Yes
519	5	Cusco	_	Masc	66	6	Not	Not	Not	Not	Not	Not	74	1.66	Not	Not	Yes	Not	Not	Not	Yes	Yes	Not	Not	Not	Always	Frequently		Sometimes		Frequently	Frequently	Not	20 Sep 20	26.8544	12a+	8	Yes	Yes	Not
503	2	Cusco	21 ROC05	Fem	46	3	Not	Not	Not	Not	Not	Not	59	1.55	Not	Not	Not	Not	Not	Not	Not	Not	Yes	Not	Not	Always	Always	Never	Always	Never	Always	Always	Yes	20 Sep 20	24.5577	7-11a	8	Not	Yes	Yes
212	1	Quillabamba	Q212	Fem	67	4	Not	Not	Not	Not	Not	Not	78	1.54	Not	Not	Not	Not	Not	Not	Not	Not	Not	Not	Not	Frequently	Frequently	Frequently	Frequently	Sometimes	Always	Always	Not	14 Sep 20	32.8892	12a+	6	Not	Yes	Yes
815	1	Periphery of Cusco	4452	Masc	32	3	Not	Not	Not	Not	Not	Not	78	1.74	Not	Not	Not	Not	Not	Not	Not	Not	Not	Not	Not	Always	Always	Always	Frequently	Never	Always	Always	Not	26 Sep 20	25.763	12a+	6	Not	Yes	Not
398	1	Cusco	89	Masc	25	5	Not	Not	Not	Not	Not	Not	70	1.75	Not	Not	Not	Not	Not	Not	Not	Not	Not	Not	Not	Frequently	Always	Frequently	Frequently	Sometimes	Always	Always	Not	27 Sep 20	22.8571	12a+	6	Not	Not	Not
58	4	Periphery of Cusco	9622	Masc	26	4	Not	Not	Not	Not		Not	61	1.65	Not	Not	Not	Not	Not	Not	Not	Not	Not	Not	Not	Always	Frequently	Never	Sometimes	Never	Always	Always	Not	14 Sep 20	22.4059	12a+	6	Not	Not	Not
128	3	Periphery of Cusco	6361	Fem	32	4	Not	Not	Not	Not	Not	Not	78	1.62	Not	Yes	Not	Yes	Not	Yes	Not	Not	Yes	Yes	Not	Frequently	Always	Always	Always	Sometimes	Always	Always	Not	14 Sep 20	29.7211	7-11a	6	Not	Not	Not
304	1	Cusco	45ER23	Fem	51	5	Not	Not	Not	Not	Not	Not	72	1.58	Yes	Yes	Yes	Yes	Not	Yes	Yes	Not	Yes	Yes	Yes	Always	Always	Sometimes	Always	Always	Always	Always	Yes	20 Sep 20	28.8415	12a+	8	Yes	Yes	Yes
66	1	Periphery of Cusco	223	Fem	65	5	Not	Not	Not	Not	Not	Not	73	1.5	Yes	Yes	Yes	Not	Not	Not	Not	Not	Yes	Not	Not	Always	Always	Never	Sometimes	Sometimes	Always	Always	Not	14 Sep 20	32.4444	7-11a	6	Not	Not	Not
826	4	Cusco	45kg10	Fem	31	6	Not	Not	Not	Not	Not	Not	70	1.55	Not	Not	Not	Not	Not	Not	Not	Not	Not	Not	Not	Always	Always		Always	Sometimes	Always	Always	Yes	27 Sep 20	29.1363	12a+	10	Not	Yes	Yes
409	1	Periphery of Cusco	50KG1	Fem	25	4	Not	Not	Not	Not	Not	Not	80	1.45	Not	Not	Not	Not	Not	Not	Not	Not	Not	Not	Not	Always	Always	Sometimes	Sometimes	Never	Always	Always	Yes	27 Sep 20	38.0499	7-11a	6	Not	Not	Not
938	6	Quillabamba	47	Masc	25	9	Not	Not	Yes	Not	Not	Not			Not	Not	Not	Not	Not	Not	Not	Not	Not	Not	Not	Always	Always	Never	Never	Never	Always	Always	Not	20 Sep 20		7-11a	10	Not	Not	Not
723	1	Cusco	45DR25	Masc	30	5	Not	Not	Not	Not	Not	Not	80	1.7	Yes	Not	Yes	Not	Not	Not	Not	Yes	Yes	Not	Not	Always	Always	Never	Never	Never	Always	Always	Not	27 Sep 20	27.6817	12a+	8	Not	Not	Not
1017 - 437	2	Quillabamba	N9	Fem	52	7	Not	Not	Not	Not	Not	Not	68	1.6	Not	Not	Not	Not	Not	Not	Not	Not	Not	Not	Not	Frequently	Frequently	Never	Never	Never	Frequently	Always	Yes	14 Sep 20	26.5625		8	Not	Not	Not
15	1	Periphery of Cusco	37	Fem	39	2	Not	Not	Not	Not	Not	Not	63	1.64	Not	Yes	Yes	Not	Not	Not	Yes	Not	Not	Not	Not	Always	Always		Frequently		Frequently	Frequently	Not	14 Sep 20	23.4236	12a+	8	Not	Yes	Yes
154	4	Cusco	89P	Masc	47	8	Not	Not	Not	Not	Not	Not	64	1.84	Not	Not	Not	Not	Not	Not	Not	Not	Not	Not	Not	Always	Always	Sometimes	Always	Always	Always	Always	Not	14 Sep 20	18.9036	<7a	9	Not	Not	Not
398	3	Cusco	89	Fem	18	5	Not	Not	Not	Not	Not	Not	49	1.58	Yes	Yes	Yes	Not	Yes	Not	Yes	Yes	Yes	Not	Not	Frequently	Always	Sometimes	Sometimes	Sometimes	Frequently	Frequently	Not	27 Sep 20	19.6283	7-11a	6	Not	Not	Not
228	1	Periphery of Cusco	S-228	Fem	23	3	Not	Not	Not	Not	Not	Not	48	1.56	Not	Not	Not	Not	Not	Not	Not	Not	Not	Not	Not	Always	Always		Sometimes		Always	Always	Not	18 Sep 20	19.7239	12a+	6	Not	Not	Not
350	1	Periphery of Cusco	29033	Masc	31	7	Not	Not	Not	Not	Not	Not	77	1.74	Not	Not	Not	Not	Not	Not	Not	Yes	Not	Not	Not	Frequently	Always	Always	Never	Never	Frequently	Always	Not	26 Sep 20	25.4327	12a+	8	Not	Not	Not
207	1	Quillabamba	Q207	Fem	44	1	Not	Not	Not	Not	Not	Not	68	1.6	Not	Not	Not	Not	Not	Not	Not	Not	Not	Not	Not	Frequently	Frequently	Never	Never	Never	Frequently	Always	Not	14 Sep 20	26.5625	7-11a	6	Not	Not	Not
391	5	Cusco	89	Masc	28	8	Not	Not	Not	Not	Not	Not	63	1.67	Not	Yes	Yes	Not	Not	Not	Not	Yes	Not	Not	Not	Frequently	Always	Always	Sometimes	Never	Frequently		Not	27 Sep 20	22.5895	12a+	8	Not	Yes	Yes
408	7	Periphery of Cusco	50ME08	Fem	36	7	Not	Not	Not	Not	Not	Not	80	1.65	Yes	Not	Not	Not	Not	Not	Not	Not	Not	Not	Not	Always	Always	Never	Frequently	Never	Always	Always	Yes	27 Sep 20	29.3848	7-11a	9	Not	Not	Not
263	4	Periphery of Cusco	66103	Fem	32	8	Not	Not	Not	Not	Not	Not	97	1.58	Not	Not	Not	Not	Yes	Not	Yes	Not	Yes	Yes	Yes	Always	Always	Frequently	Frequently	Sometimes	Always	Always	Yes	19 Sep 20	38.8559	12a+	10	Not	Yes	Yes
350	2	Periphery of Cusco	29033	Fem	70	7	Yes	Not	Not	Not	Not	Not	66	1.58	Not	Yes	Not	Not	Not	Not	Not	Not	Not	Yes	Not	Always	Always	Always	Always		Always		Not	26 Sep 20	26.4381	<7a	8	Not	Not	Not
226	3	Periphery of Cusco	s-226	Fem	24	4	Not	Not	Not	Not	Not	Yes	74	1.6	Not	Not	Not	Not	Not	Not	Yes	Not	Yes	Yes	Not	Always	Always	Never	Sometimes	Sometimes	Always	Always	Not	18 Sep 20	28.9062	12a+	9	Not	Not	Not
314	4	Cusco	45DR2	Masc	30	5	Not	Not	Not	Not	Not	Not	92	1.73	Not	Not	Not	Not	Not	Not	Not	Not	Yes	Not	Not	Always	Always	Always	Never	Sometimes	Always	Always	Not	20 Sep 20	30.7394	12a+	7	Not	Yes	Yes
262	4	Periphery of Cusco	77066	Fem	40	6	Not	Not	Not	Not	Not	Not	57	1.6	Not	Not	Not	Not	Not	Not	Not	Not	Yes	Not	Not	Always	Always	Sometimes	Always	Sometimes	Always	Always	Not	19 Sep 20	22.2656	12a+	7	Not	Not	Not
128	2	Periphery of Cusco	6361	Fem	36	4	Not	Not	Not	Not	Not	Not	45	1.5	Not	Not	Yes	Not	Not	Not	Not	Not	Not	Not	Not	Always	Always	Sometimes	Always	Sometimes	Sometimes	Always	Not	14 Sep 20	20	12a+	6	Not	Not	Not
280	1	Periphery of Cusco	1723	Fem	29	1	Not	Yes	Not	Not	Not	Not	60	1.62	Yes	Not	Not	Not	Not	Not	Not	Not	Not	Not	Not	Always	Always	Sometimes	Sometimes	Never	Always	Always	Yes	19 Sep 20	22.8624	12a+	7	Not	Not	Yes
133	3	Cusco	3114	Fem	45	5	Not	Not	Not	Not	Not	Not	75	1.6	Yes	Yes	Not	Not	Not	Not	Not	Yes	Not	Not	Not	Always	Always	Frequently	Frequently	Frequently	Always	Always	Not	14 Sep 20	29.2969		10	Not	Yes	Yes
64	2	Periphery of Cusco	222	Fem	54	4	Not	Not	Not	Not	Not	Not	73	1.48	Not	Not	Not	Yes	Not	Not	Not	Not	Not	Not	Not	Sometimes	Frequently		Sometimes	Sometimes	Frequently	Always	Not	14 Sep 20	33.3272	7-11a	6	Not	Not	Not
367	4	Cusco	452B26	Masc	61	6	Not	Not	Not	Not	Not	Not	80	1.6	Not	Yes	Not	Not	Not	Yes	Not	Not	Yes	Not	Not	Always	Always	Sometimes		Sometimes	Always	Always	Yes	26 Sep 20	31.25	12a+	9	Not	Yes	Yes
540	1	Cusco	45ER5	Fem	71	5	Not	Yes	Not	Not	Not	Not	60	1.42	Not	Not	Not	Not	Not	Not	Not	Not	Not	Not	Not	Always	Always	Never	Sometimes	Never	Always	Always	Not	20 Sep 20	29.756	<7a	6	Not	Not	Not
299	1	Cusco	45ER23	Fem	54	5	Not	Not	Not	Not	Not	Not	58	1.52	Yes	Yes	Not	Not	Yes	Not	Not	Not	Yes	Not	Not	Always	Always	Sometimes	Sometimes	Never	Always	Always	Yes	20 Sep 20	25.1039	7-11a	8	Not	Yes	Yes
378	3	Periphery of Cusco	25A10	Fem	40	4	Not	Not	Not	Not	Not	Not	60	1.59	Yes	Yes	Yes	Yes	Not	Not	Not	Not	Yes	Yes	Not	Always	Sometimes	Never	Sometimes	Never	Always	Always	Yes	26 Sep 20	23.7332	<7a	8	Not	Not	Yes
271	4	Periphery of Cusco	66063	Fem	23	5	Not	Not	Not	Not	Not	Not	44	1.53	Yes	Not	Not	Not	Not	Not	Not	Yes	Yes	Not	Yes	Always	Always	Frequently	Sometimes	Never	Always	Always	Yes	19 Sep 20	18.7962	12a+	7	Not	Not	Yes
145	2	Cusco	89G	Fem	32	6	Not	Not	Not	Not	Not	Not	67	1.53	Not	Not	Not	Not	Not	Not	Not	Not	Not	Not	Not	Always	Always	Never	Always	Always	Always	Always	Yes	14 Sep 20	28.6215	<7a	7	Not	Not	Not
22	3	Periphery of Cusco	493A1	Fem	36	4	Not	Not	Not	Not	Not	Not	82	1.64	Yes	Yes	Yes	Yes	Not	Yes	Not	Not	Yes	Not	Yes	Sometimes	Sometimes	Sometimes	Sometimes	Sometimes	Sometimes	Frequently	Yes	14 Sep 20	30.4878	12a+	6	Not	Yes	Yes
630	2	Periphery of Cusco	4413	Masc	84	7	Not	Not	Not	Not	Not	Not	43	1.6	Yes	Not	Yes	Yes	Yes	Yes	Not	Not	Yes	Yes	Yes	Frequently	Always	Always	Sometimes	Never	Frequently	Always	Yes	26 Sep 20	16.7969	7-11a	10	Yes	Yes	Yes
606	4	Periphery of Cusco	29-JR-03	Masc	86	6	Yes	Not	Not	Not	Not	Not			Not	Not	Not	Not	Not	Yes	Not	Yes	Yes	Not	Not	Always	Always	Never	Sometimes	Never	Frequently	Always	Not	27 Sep 20		<7a	10	Not	Not	Not
29	3	Periphery of Cusco	4411	Masc	65	4	Not	Not	Not	Not	Not	Not	55	1.55	Not	Not	Not	Not	Yes	Not	Not	Not	Not	Not	Not	Always	Always	Never	Always	Never	Always	Always	Not	14 Sep 20	22.8928	7-11a	6	Not	Not	Not
826	1	Cusco	45kg10	Fem	57	6	Not	Not	Not	Not	Not	Not	74	1.48	Not	Not	Not	Not	Not	Not	Not	Not	Not	Not	Not	Frequently	Always		Always	Never	Always	Always	Yes	27 Sep 20	33.7838	7-11a	10	Not	Yes	Yes
192	6	Quillabamba	192.1.10	Masc	69	6	Not	Not	Not	Not	Not	Not	69	1.5	Not	Not	Not	Not	Not	Not	Not	Not	Not	Not	Not	Frequently	Frequently	Never	Never	Never	Frequently	Always	Yes	14 Sep 20	30.6667	7-11a	6	Not	Yes	Yes
801	1	Periphery of Cusco	4432	Fem	67	5	Yes	Not	Not	Not	Yes	Not	70	1.58	Not	Yes	Yes	Not	Not	Yes	Not	Yes	Not	Yes	Not	Always	Frequently	Never	Never	Never	Frequently	Always	Not	26 Sep 20	28.0404	12a+	6	Not	Not	Not
503	1	Cusco	21 ROC05	Fem	44	3	Not	Not	Not	Not	Not	Not	69	1.67	Not	Not	Not	Not	Not	Not	Not	Not	Yes	Not	Not	Always	Always	Never	Always	Never	Always	Always	Yes	20 Sep 20	24.7409	12a+	8	Not	Yes	Yes
337	2	Periphery of Cusco	2510	Fem	41	2	Not	Not	Not	Not	Not	Not			Not	Yes	Not	Not	Not	Yes	Not	Not	Yes	Not	Not	Frequently	Always	Frequently	Frequently	Never	Frequently	Frequently	Not	25 Sep 20		<7a	6	Not	Not	Not
133	4	Cusco	3114	Masc	19	5	Not	Not	Not	Not	Not	Not	78	1.82	Not	Yes	Yes	Not	Not	Not	Not	Yes	Not	Not	Not	Always	Always		Sometimes	Sometimes	Always	Always	Not	14 Sep 20	23.5479	7-11a	10	Not	Yes	Yes
725	3	Cusco	45DR23	Masc	69	3	Not	Not	Not	Not	Not	Not	87	1.65	Not	Yes	Not	Not	Not	Not	Not	Not	Yes	Yes	Not	Always	Always	Sometimes	Sometimes	Frequently	Always	Always	Not	27 Sep 20	31.9559	7-11a	6	Not	Not	Not
34	5	Periphery of Cusco	3881	Fem	20	6	Not	Not	Not	Not	Not	Yes	51	1.52	Yes	Yes	Yes	Not	Yes	Yes	Yes	Not	Yes	Yes	Not	Always	Always		Sometimes		Always	Always	Not	14 Sep 20	22.0741	12a+	9	Not	Not	Not
569	3	Periphery of Cusco	5261	Fem	47	5	Not	Not	Not	Not	Not	Not	55	1.45	Yes	Yes	Yes	Yes	Yes	Yes	Not	Not	Yes	Yes	Yes	Always	Always	Sometimes	Sometimes	Never	Always	Always	Yes	20 Sep 20	26.1593	7-11a	7	Not	Not	Yes
706	2	Periphery of Cusco	45ME14	Fem	42	5	Not	Not	Not	Not	Not	Not	79	1.6	Yes	Yes	Not	Not	Not	Not	Not	Not	Not	Not	Not	Sometimes	Sometimes	Never	Sometimes	Never	Frequently	Always	Yes	27 Sep 20	30.8594	7-11a	7	Not	Not	Not
627	2	Cusco	212B31	Fem	28	5	Not	Not	Not	Not	Not	Not	60	1.53	Not	Not	Not	Not	Yes	Not	Not	Not	Not	Not	Not	Always	Always	Never	Never	Never	Always	Always	Not	26 Sep 20	25.6312	12a+	6	Not	Not	Not
146	1	Cusco	89H	Masc	25	7	Not	Not	Not	Not	Not	Not	95	1.7	Not	Not	Not	Not	Not	Not	Not	Not	Not	Not	Not	Always	Always	Never	Always	Never	Always	Always	Not	14 Sep 20	32.872	<7a	9	Not	Not	Not
901	1	Quillabamba	10	Fem	43	3	Not	Not	Not	Not	Not	Not	84	1.57	Not	Not	Not	Not	Not	Not	Not	Not	Not	Not	Not	Always	Always	Never	Never	Never	Always	Always	Not	20 Sep 20	34.0785	12a+	6	Not	Not	Not
229	5	Periphery of Cusco	8363	Fem	32	5	Not	Not	Not	Not	Not	Not	67	1.63	Not	Yes	Not	Not	Not	Not	Not	Not	Yes	Not	Not	Always	Always	Frequently	Frequently	Never	Always	Always	Not	18 Sep 20	25.2174	12a+	8	Not	Not	Not
519	1	Cusco	_	Masc	33	6	Not	Not	Not	Not	Not	Not	85	1.66	Not	Not	Not	Not	Not	Not	Not	Not	Not	Not	Not	Frequently	Always	Always	Never	Never	Always	Always	Yes	20 Sep 20	30.8463	12a+	8	Yes	Yes	Not
744	4	Cusco	45JL04	Fem	33	5	Not	Not	Not	Not	Not	Not	53	1.53	Not	Not	Not	Not	Not	Not	Not	Not	Yes	Not	Not	Always	Always	Never	Always	Never	Always	Always	Yes	27 Sep 20	22.6409	7-11a	7	Not	Yes	Yes
49	8	Cusco	3011	Masc	20	9	Not	Not	Not	Not	Not	Not	84	1.81	Not	Not	Not	Not	Not	Not	Not	Not	Not	Not	Not	Always	Always	Never	Always	Never	Always	Always	Not	14 Sep 20	25.6402	12a+	9	Yes	Not	Not
264	4	Periphery of Cusco	66061	Fem	51	4	Not	Not	Not	Not	Not	Not	62	1.55	Not	Not	Yes	Not	Yes	Yes	Not	Not	Yes	Yes	Not	Frequently	Always	Always	Always	Always	Always	Always	Yes	19 Sep 20	25.8065	12a+	6	Not	Yes	Yes
272	2	Periphery of Cusco	77021	Masc	25	3	Not	Not	Not	Not	Not	Not	70	1.73	Yes	Yes	Not	Not	Not	Not	Not	Not	Not	Not	Yes	Always	Always	Never	Always	Never	Always	Always	Yes	19 Sep 20	23.3887	12a+	6	Yes	Yes	Yes
61	4	Periphery of Cusco	22.1B	Fem	66	4	Not	Yes	Not	Not	Not	Not	58	1.45	Not	Not	Yes	Not	Not	Not	Not	Not	Not	Not	Not	Always	Always	Frequently			Always	Always	Not	14 Sep 20	27.5862	<7a	8	Not	Not	Not
1018- 439	3	Quillabamba	N11	Fem	56	6	Not	Not	Not	Not	Not	Not	76	1.58	Not	Not	Not	Not	Not	Not	Not	Not	Not	Not	Not	Frequently	Frequently	Never	Never	Never	Always	Frequently	Not	14 Sep 20	30.4438	7-11a	6	Not	Yes	Yes
144	1	Cusco	89F	Masc	70	6	Yes	Not	Not	Not	Not	Not	68	1.5	Not	Not	Not	Not	Not	Not	Not	Not	Not	Not	Not	Always	Always	Never	Sometimes	Sometimes	Always	Always	Not	14 Sep 20	30.2222	7-11a	8	Not	Not	Not
98	3	Periphery of Cusco	22271	Masc	22	4	Not	Not	Not	Not	Not	Not	65	1.66	Not	Not	Not	Not	Not	Not	Not	Not	Not	Not	Not	Frequently	Frequently	Never	Sometimes	Never	Frequently	Always	Not	14 Sep 20	23.5883	12a+	7	Not	Not	Not
117	1	Periphery of Cusco	4413	Masc	70	4	Not	Not	Not	Not	Not	Not	82	1.59	Not	Yes	Not	Not	Not	Not	Not	Not	Not	Not	Not	Always	Always	Never	Sometimes	Sometimes	Always	Always	Yes	14 Sep 20	32.4354	7-11a	6	Not	Not	Not
113	2	Periphery of Cusco	3813	Fem	27	3	Not	Not	Not	Not	Not	Not	70	1.57	Not	Not	Not	Not	Yes	Yes	Yes	Not	Yes	Yes	Yes	Always	Always		Frequently	Sometimes	Always	Always	Yes	14 Sep 20	28.3987	12a+	6	Not	Yes	Yes
38	1	Periphery of Cusco	3862	Fem	77	5	Not	Yes	Not	Not	Not	Not	50	1.43	Yes	Yes	Yes	Not	Yes	Yes	Yes	Not	Not	Yes	Not	Always	Always	Always		Never	Always	Always	Yes	14 Sep 20	24.4511	<7a	8	Not	Yes	Yes
271	2	Periphery of Cusco	66063	Masc	53	5	Not	Not	Not	Not	Not	Not	68	1.6	Yes	Not	Not	Not	Not	Not	Not	Yes	Yes	Not	Not	Frequently	Always	Always	Always	Always	Always	Always	Not	19 Sep 20	26.5625	7-11a	7	Not	Not	Yes
336	2	Periphery of Cusco	2502	Fem	54	2	Not	Not	Not	Not	Not	Not	63	1.5	Yes	Yes	Yes	Not	Yes	Yes	Not	Yes	Yes	Yes	Yes	Sometimes	Frequently	Sometimes	Sometimes	Sometimes	Frequently	Frequently	Yes	25 Sep 20	28	7-11a	6	Not	Yes	Yes
391	8	Cusco	89	Fem	27	8	Not	Not	Not	Not	Not	Not	53	1.5	Yes	Yes	Yes	Not	Not	Yes	Yes	Yes	Yes	Yes	Yes	Frequently	Always	Always	Sometimes	Never	Always	Frequently	Yes	27 Sep 20	23.5556	12a+	8	Not	Yes	Yes
617	2	Periphery of Cusco	23A28	Masc	53	3	Not	Not	Not	Not	Not	Not	70	1.72	Not	Not	Not	Not	Yes	Not	Yes	Not	Yes	Not	Not	Frequently	Always	Always	Always	Never	Always	Frequently	Yes	26 Sep 20	23.6614	7-11a	9	Not	Not	Not
367	5	Cusco	452B26	Fem	21	6	Not	Not	Not	Not	Not	Not	58	1.58	Not	Not	Not	Not	Yes	Not	Yes	Not	Yes	Not	Not	Always	Always	Frequently	Sometimes	Frequently	Always	Always	Yes	26 Sep 20	23.2335	12a+	9	Not	Yes	Yes
57	2	Periphery of Cusco	9653	Masc	24	7	Not	Not	Not	Not	Not	Not	58	1.6	Not	Not	Not	Not	Not	Not	Not	Not	Not	Not	Yes	Always	Always	Frequently	Frequently	Never	Sometimes	Sometimes	Yes	14 Sep 20	22.6562	12a+	7	Not	Yes	Yes
826	2	Cusco	45kg10	Fem	32	6	Not	Not	Not	Not	Not	Not	54	1.51	Not	Not	Not	Not	Not	Not	Not	Not	Not	Not	Not	Frequently	Always		Always	Never	Always	Always	Yes	27 Sep 20	23.6832	12a+	10	Not	Yes	Yes
1016 - 436	1	Quillabamba	N6	Masc	59	6	Not	Not	Not	Not	Not	Not	86	1.55	Not	Not	Not	Not	Not	Not	Not	Not	Not	Not	Not	Frequently	Frequently	Never	Never	Never	Frequently	Frequently	Not	14 Sep 20	35.7961	7-11a	8	Not	Not	Not
154	3	Cusco	89P	Fem	24	8	Not	Not	Not	Not	Not	Not	62	1.62	Not	Not	Not	Not	Not	Not	Not	Not	Not	Not	Not	Always	Always	Sometimes	Always	Sometimes	Always	Always	Yes	14 Sep 20	23.6244	<7a	9	Not	Not	Not
142	4	Cusco	89D	Masc	30	4	Not	Not	Not	Not	Not	Not	60	1.55	Not	Yes	Not	Not	Not	Not	Not	Not	Not	Not	Not	Always	Always	Never	Always	Frequently	Always		Not	14 Sep 20	24.974	7-11a	6	Not	Not	Not
408	3	Periphery of Cusco	50ME08	Fem	57	7	Not	Not	Not	Not	Not	Not	90	1.65	Not	Not	Not	Not	Not	Not	Not	Not	Not	Not	Not	Sometimes	Sometimes	Never	Never	Never	Frequently	Frequently	Not	27 Sep 20	33.0579	7-11a	9	Not	Not	Not
535	3	Cusco	45ER12	Masc	23	4	Not	Not	Not	Not	Not	Not	75	1.78	Not	Not	Not	Not	Not	Yes	Not	Not	Not	Not	Not	Always	Always	Always	Always	Always	Always	Always	Not	20 Sep 20	23.6713	12a+	7	Not	Not	Not
606	6	Periphery of Cusco	29-JR-03	Fem	57	6	Not	Not	Not	Not	Not	Not	62	1.6	Not	Not	Not	Not	Not	Not	Not	Not	Not	Not	Not	Always	Always		Frequently	Sometimes	Always		Yes	27 Sep 20	24.2188	12a+	10	Not	Not	Not
76	2	Periphery of Cusco	423	Fem	36	5	Not	Not	Not	Not		Not	70	1.61	Not	Not	Not	Not	Not	Not	Not	Not	Not	Not	Not	Always	Always	Never	Always	Never	Always	Always	Yes	14 Sep 20	27.0051	12a+	8	Not	Not	Not
285	1	Periphery of Cusco	1712B	Fem	50	2	Not	Not	Not	Not	Not	Not	82	1.52	Yes	Not	Yes	Not	Not	Not	Not	Not	Yes	Not	Not	Sometimes	Always	Never	Frequently	Never	Always	Always	Yes	19 Sep 20	35.4917	12a+	10		Not	Not
513	2	Cusco	513.1.10	Fem	53	5	Not	Not	Not	Not	Not	Not	62	1.55	Not	Not	Not	Not	Not	Not	Not	Not	Not	Not	Not	Always	Always	Always	Always	Always	Always	Always	Not	20 Sep 20	25.8065	12a+	8	Not	Not	Yes
113	3	Periphery of Cusco	3813	Masc	30	3	Not	Not	Not	Not	Not	Not	64	1.64	Yes	Yes	Not	Not	Not	Yes	Yes	Yes	Not	Not	Not	Frequently	Always	Never	Sometimes	Never	Always	Always	Yes	14 Sep 20	23.7954	12a+	6	Not	Yes	Yes
23	2	Periphery of Cusco	4951	Fem	46	3	Not	Yes	Not	Not	Not	Not	71	1.56	Not	Not	Not	Not	Not	Not	Not	Not	Yes	Not	Not	Always	Always	Always	Always	Sometimes	Always	Always	Not	14 Sep 20	29.1749	12a+	6	Not	Not	Yes
607	4	Periphery of Cusco	29-JR-04	Fem	41	6	Not	Not	Not	Not	Not	Not	65	1.5	Not	Not	Yes	Not	Not	Yes	Not	Not	Yes	Yes	Not	Always	Always	Always	Always	Always	Always	Always	Not	27 Sep 20	28.8889	<7a	6	Not	Yes	Yes
1019- 440	3	Quillabamba	NC12	Fem	30	5	Not	Not	Not	Not	Not	Not	64	1.51	Not	Not	Not	Not	Not	Not	Not	Not	Not	Not	Not	Frequently	Frequently	Never	Never	Never	Always	Frequently	Not	14 Sep 20	28.0689	7-11a	10	Not	Yes	Yes
229	1	Periphery of Cusco	8363	Masc	59	5	Not	Not	Not	Not	Not	Not	83	1.79	Not	Not	Not	Not	Not	Not	Not	Not	Not	Not	Not	Always	Always		Frequently	Never	Always	Always	Not	18 Sep 20	25.9043	12a+	8	Not	Not	Not
822	1	Cusco	45kg06	Masc	47	5	Not	Not	Not	Not	Not	Not	60	1.67	Not	Not	Not	Not	Not	Yes	Not	Not	Not	Not	Not	Always	Always	Always	Always	Sometimes	Always	Always	Yes	27 Sep 20	21.5139	7-11a	8	Not	Not	Not
568	4	Periphery of Cusco	5351	Fem	37	5	Not	Yes	Not	Not	Not	Not	65	1.59	Not	Yes	Not	Not	Yes	Not	Not	Not	Yes	Not	Not	Frequently	Always	Sometimes	Sometimes	Never	Always	Frequently	Not	20 Sep 20	25.711	12a+	8	Not	Not	Yes
517	5	Cusco	_	Fem	60	5	Yes	Not	Not	Not	Not	Not	69	1.55	Not	Not	Not	Not	Not	Not	Not	Not	Not	Not	Not	Frequently	Always	Never	Always	Never	Always	Always	Not	20 Sep 20	28.7201	<7a	8	Not	Yes	Not
387b	5	Cusco	89	Fem	53	5	Not	Not	Not	Not	Not	Not	85	1.57	Not	Yes	Yes	Not	Yes	Yes	Not	Not	Yes	Yes	Not	Always	Always		Always		Always	Always	Not	27 Sep 20	34.4842	7-11a	8	Not	Not	Not
304	2	Cusco	45ER23	Fem	31	5	Not	Not	Not	Not	Not	Not	64	1.6	Yes	Yes	Yes	Not	Not	Not	Not	Not	Yes	Yes	Not	Always	Always	Frequently		Never	Always	Always	Yes	20 Sep 20	25	12a+	8	Yes	Yes	Yes
730	4	Cusco	45DR18	Masc	34	6	Not	Not	Not	Not	Not	Not	61	1.67	Not	Not	Not	Not	Yes	Yes	Not	Not	Yes	Not	Not	Always	Always	Sometimes	Sometimes	Sometimes	Always	Always	Yes	27 Sep 20	21.8724	12a+	7	Not	Yes	Yes
569	5	Periphery of Cusco	5261	Masc	41	5	Not	Not	Not	Not	Not	Not	80	1.64	Yes	Yes	Yes	Yes	Yes	Yes	Yes	Not	Yes	Yes	Yes	Always	Always	Never	Never	Never	Always	Always	Yes	20 Sep 20	29.7442	7-11a	7	Not	Not	Yes
37	2	Periphery of Cusco	3863	Fem	58	5	Not	Not	Not	Not	Not	Not	58	1.55	Not	Not	Yes	Not	Not	Not	Not	Not	Not	Not	Not		Always	Never					Not	14 Sep 20	24.1415	7-11a	8	Not	Not	Not
139	1	Cusco	89A	Masc	33	4	Not	Not	Not	Not	Not	Not	74	1.61	Not	Not	Not	Not	Not	Not	Not	Not	Not	Not	Not	Frequently	Always	Never	Always	Never	Always	Frequently	Not	14 Sep 20	28.5483	12a+	6	Not	Not	Not
339	1	Periphery of Cusco	2512	Fem	38	1	Not	Not	Not	Not	Not	Not	83	1.55	Not	Not	Not	Not	Not	Not	Not	Not	Not	Not	Not	Frequently	Always	Never	Sometimes	Sometimes	Always	Always	Yes	25 Sep 20	34.5474	12a+	6	Yes	Yes	Not
13	1	Periphery of Cusco	33	Masc	19	2	Not	Not	Not	Not	Not	Not	60	1.75	Not	Not	Not	Not	Not	Not	Not	Not	Not	Not	Not	Frequently	Always	Never	Frequently	Never	Sometimes	Frequently	Not	14 Sep 20	19.5918	12a+	7	Not	Not	Not
1022- 432	5	Quillabamba	N1	Fem	21	5	Not	Not	Not	Not	Not	Not	60	1.64	Yes	Yes	Not	Not	Not	Yes	Not	Not	Yes	Not	Not	Frequently	Frequently	Never	Sometimes	Never	Frequently	Always	Not	14 Sep 20	22.3082	12a+	8	Not	Yes	Not
609	2	Periphery of Cusco	25-A-20	Masc	38	5	Not	Not	Not	Not	Not	Not	69	1.51	Not	Not	Yes	Not	Not	Not	Not	Not	Yes	Not	Yes	Sometimes	Sometimes	Never	Sometimes	Never	Always	Always	Yes	26 Sep 20	30.2618	12a+	7	Not	Not	Not
299	5	Cusco	45ER23	Fem	19	5	Not	Not	Not	Not	Not	Not	57	1.55	Not	Not	Not	Not	Not	Not	Not	Not	Not	Yes	Not	Always	Always	Never	Sometimes	Never	Always	Always	Yes	20 Sep 20	23.7253	7-11a	8	Not	Yes	Yes
737	2	Cusco	45JL10	Fem	35	6	Not	Not	Not	Not	Not	Not	68	1.5	Yes	Not	Yes	Not	Yes	Not	Not	Not	Yes	Not	Not	Frequently	Frequently	Sometimes	Frequently	Never	Frequently	Always	Not	27 Sep 20	30.2222	12a+	10	Not	Yes	Yes
298	2	Cusco	45DR4	Fem	26	4	Not	Not	Not	Not	Not	Not	63	1.65	Not	Yes	Not	Not	Not	Not	Not	Not	Not	Not	Not	Frequently	Always	Never	Always	Sometimes	Always	Always	Not	20 Sep 20	23.1405	12a+	9	Not	Not	Yes
307	1	Cusco	45ER16	Masc	34	2	Not	Not	Not	Not	Not	Not	55	1.6	Not	Yes	Not	Not	Not	Yes	Yes	Not	Not	Not	Not	Always	Always	Sometimes	Sometimes	Never	Always	Always	Not	20 Sep 20	21.4844	12a+	6	Not	Yes	Yes
254	2	Periphery of Cusco	1722	Fem	29	5	Not	Not	Not	Not	Not	Not	62	1.64	Not	Yes	Not	Not	Not	Not	Not	Not	Yes	Not	Not	Always	Always	Never	Frequently	Sometimes	Always	Always	Not	19 Sep 20	23.0517	12a+	7	Not	Not	Not
606	5	Periphery of Cusco	29-JR-03	Fem	54	6	Yes	Not	Not	Not	Not	Not	70	1.57	Not	Yes	Not	Not	Not	Yes	Not	Not	Yes	Not	Not	Always	Always	Sometimes	Always	Sometimes	Always	Always	Not	27 Sep 20	28.3987	<7a	10	Not	Not	Not
1015	4	Quillabamba	n8	Fem	26	6	Not	Not	Not	Not	Not	Not	76	1.5	Not	Not	Not	Not	Not	Not	Not	Not	Not	Not	Not	Frequently	Frequently	Never	Never	Never	Frequently	Frequently	Not	14 Sep 20	33.7778	7-11a	9	Not	Not	Not
406	1	Periphery of Cusco	50ME05B	Fem	44	1	Not	Not	Not	Not	Not	Not	70	1.6	Not	Yes	Not	Not	Not	Yes	Not	Not	Yes	Not	Not	Frequently	Sometimes	Never	Sometimes	Never	Frequently	Frequently	Yes	27 Sep 20	27.3438	12a+	8	Not	Not	Not
826	3	Cusco	45kg10	Masc	24	6	Not	Not	Not	Not	Not	Not	71	1.6	Not	Not	Not	Not	Not	Not	Not	Not	Not	Not	Not	Always	Always	Never	Always	Sometimes	Always	Always	Yes	27 Sep 20	27.7344	12a+	10	Not	Yes	Yes
64	4	Periphery of Cusco	222	Masc		4	Not	Not	Not	Not	Not	Not	82	1.64	Yes	Not	Yes	Not	Not	Yes	Yes	Not	Not	Not	Yes	Always	Always		Sometimes		Always	Always	Yes	20 Sep 20	30.4878	7-11a	6	Not	Not	Not
812	1	Periphery of Cusco	4461	Masc	48	1	Not	Not	Not	Not	Not	Not	80	1.74	Yes	Not	Not	Not	Not	Not	Not	Not	Not	Not	Not	Always	Always	Never	Always	Never	Always	Always	Not	26 Sep 20	26.4236	12a+	6	Not	Not	Not
262	5	Periphery of Cusco	77066	Fem	45	6	Not	Not	Not	Not	Not	Not	60	1.57	Not	Yes	Not	Not	Not	Not	Not	Not	Not	Not	Not	Always	Always		Always	Sometimes	Always	Always	Not	19 Sep 20	24.3418		7	Not	Not	Not
83	4	Periphery of Cusco	411A	Masc	47	6	Not	Not	Not	Not	Not	Not	74	1.7	Not	Not	Not	Not	Not	Not	Not	Not	Not	Not	Not	Always	Always	Never	Sometimes	Never	Always	Always	Not	14 Sep 20	25.6055	12a+	8	Not	Not	Yes
523	3	Cusco	45 ANT 01	Fem	18	3	Not	Not	Not	Not	Not	Not	65	1.56	Not	Not	Not	Not	Not	Not	Not	Not	Not	Not	Not	Frequently	Always	Always	Frequently	Never	Always	Always	Yes	20 Sep 20	26.7094	12a+	7	Not	Not	Not
37	5	Periphery of Cusco	3863	Fem	60	5	Not	Not	Not	Not	Not	Not	75	1.58	Not	Not	Not	Not	Not	Not	Not	Not	Not	Not	Not	Always	Always	Never	Never	Never	Always	Always	Not	14 Sep 20	30.0433		8	Not	Not	Not
569	1	Periphery of Cusco	5261	Masc	23	5	Not	Not	Not	Not	Not	Not	69	1.7	Not	Not	Not	Not	Yes	Yes	Yes	Not	Yes	Yes	Not	Sometimes	Always	Never	Never	Never	Always	Always	Not	20 Sep 20	23.8754	12a+	7	Not	Not	Yes
396	1	Cusco	89	Fem	22	2	Not	Not	Not	Not	Not	Not	55	1.55	Yes	Not	Not	Yes	Yes	Yes	Yes	Yes	Yes	Not	Yes	Sometimes	Always	Sometimes	Sometimes	Never	Always	Always	Yes	27 Sep 20	22.8928	12a+	8	Yes	Not	Yes
624	1	Periphery of Cusco	25A35	Masc		1	Not	Not	Not	Not	Not	Not	68	1.69	Not	Not	Not	Not	Not	Not	Not	Not	Not	Not	Not	Frequently	Always	Never	Frequently	Never	Always	Always	Not	26 Sep 20	23.8087	7-11a	6	Yes	Not	Not
606	1	Periphery of Cusco	29-JR-03	Masc	57	6	Not	Not	Not	Not	Not	Not	75	1.69	Yes	Yes	Yes	Not	Not	Yes	Not	Not	Yes	Not	Not	Always	Always	Never	Frequently	Never	Always	Always	Not	27 Sep 20	26.2596	12a+	10	Not	Not	Not
938	8	Quillabamba	47	Fem	26	9	Not	Not	Not	Not	Not	Not			Not	Not	Not	Not	Not	Not	Not	Not	Not	Not	Not	Always	Always	Never	Never	Never	Always	Always	Not	20 Sep 20		12a+	10	Not	Not	Not
627	1	Cusco	212B31	Fem	51	5	Yes	Not	Not	Not	Not	Not	70	1.56	Not	Not	Not	Not	Not	Not	Not	Not	Not	Not	Not	Always	Always	Never	Never	Sometimes	Always	Always	Not	26 Sep 20	28.764	12a+	6	Not	Not	Not
76	1	Periphery of Cusco	423	Masc	65	5	Yes	Not	Not	Not	Not	Not	96	1.63	Not	Not	Not	Not	Not	Not	Not	Not	Not	Not	Not	Frequently	Sometimes	Never	Sometimes	Never	Always	Always	Not	14 Sep 20	36.1323	7-11a	8	Not	Not	Not
188	1	Quillabamba	Q188	Masc	41	1	Not	Not	Not	Not	Not	Not	96	1.74	Not	Yes	Yes	Not	Not	Yes	Yes	Not	Yes	Yes	Not	Always	Always	Frequently	Sometimes	Sometimes	Always	Always	Not	14 Sep 20	31.7083	12a+	7	Not	Yes	Yes
378	2	Periphery of Cusco	25A10	Fem	43	4	Not	Not	Not	Not	Not	Not	100	1.6	Yes	Yes	Yes	Not	Not	Not	Not	Not	Yes	Yes	Not	Frequently	Frequently	Never	Always	Never	Always	Always	Not	26 Sep 20	39.0625	<7a	8	Not	Not	Yes
705	2	Cusco	45ME15	Fem	37	3	Not	Not	Not	Not	Not	Not	80	1.62	Yes	Yes	Not	Not	Yes	Yes	Not	Not	Yes	Yes	Not	Frequently	Frequently	Never	Frequently	Never	Frequently	Frequently	Yes	27 Sep 20	30.4832	12a+	7	Not	Not	Not
117	3	Periphery of Cusco	4413	Masc	34	4	Not	Not	Not	Not	Not	Not	82	1.72	Not	Not	Not	Not	Not	Not	Not	Yes	Not	Not	Not	Always	Always	Always	Never	Never	Always	Sometimes	Yes	14 Sep 20	27.7177	7-11a	6	Not	Not	Not
49	6	Cusco	3011	Masc	58	9	Not	Not	Not	Not	Not	Not	122	1.86	Not	Not	Not	Not	Not	Not	Not	Not	Not	Not	Not	Always	Always	Never	Always	Sometimes	Always	Always	Not	14 Sep 20	35.2642	12a+	9	Yes	Not	Not
337	1	Periphery of Cusco	2510	Fem	20	2	Not	Not	Not	Not	Not	Not	52	1.52	Yes	Yes	Not	Not	Not	Not	Not	Not	Yes	Not	Not	Always	Always	Sometimes	Frequently	Never	Always	Always	Not	25 Sep 20	22.5069	12a+	6	Not	Not	Not
821	2	Cusco	45kg05	Masc	53	3	Not	Not	Not	Not	Not	Not	78	1.69	Not	Yes	Yes	Not	Not	Not	Not	Yes	Yes	Not	Not	Always	Always		Always		Always	Always	Not	27 Sep 20	27.31	12a+	7	Not	Not	Not
810	1	Periphery of Cusco	4453	Fem	41	4	Not	Not	Not	Not	Not	Not	78	1.57	Not	Not	Not	Not	Not	Not	Not	Not	Not	Not	Not	Always	Always	Never	Always	Never	Always	Always	Not	26 Sep 20	31.6443	12a+	7	Not	Not	Not
229	4	Periphery of Cusco	8363	Fem	30	5	Not	Not	Not	Not	Not	Not	62	1.64	Not	Not	Not	Not	Not	Not	Not	Not	Not	Not	Not		Always	Frequently	Frequently	Never	Always	Always	Not	18 Sep 20	23.0517	12a+	8	Not	Not	Not
102	1	Cusco	3162	Masc	33	2	Not	Not	Not	Not	Not	Not	80	1.8	Not	Not	Not	Not	Not	Not	Not	Not	Not	Not	Not	Always	Always	Always			Always	Always	Not	14 Sep 20	24.6914	12a+	8	Not	Not	Not
830	1	Cusco	45kg12	Fem	44	1	Not	Not	Not	Not	Not	Not	58	1.48	Not	Not	Not	Not	Not	Not	Not	Not	Not	Not	Not	Frequently	Always	Always	Always	Frequently	Always	Always	Yes	27 Sep 20	26.4792	12a+	6	Not	Not	Not
535	4	Cusco	45ER12	Fem	47	4	Not	Not	Not	Not	Not	Not	80	1.62	Not	Not	Not	Not	Not	Not	Not	Not	Yes	Not	Not	Always	Always	Always	Always	Always	Always	Always	Not	20 Sep 20	30.4832	12a+	7	Not	Not	Not
370	1	Periphery of Cusco	25A13	Masc	48	3	Not	Not	Not	Not	Not	Not	65	1.65	Yes	Yes	Yes	Not	Yes	Yes	Not	Not	Yes	Yes	Not	Always	Sometimes	Never	Sometimes	Never	Always	Always	Yes	26 Sep 20	23.8751	12a+	6	Not	Not	Not
113	1	Periphery of Cusco	3813	Fem	50	3	Not	Not	Yes	Not	Not	Not	80	1.58	Yes	Yes	Yes	Not	Yes	Yes	Not	Yes	Yes	Yes	Not	Frequently	Always	Never	Frequently	Sometimes	Always	Always	Yes	14 Sep 20	32.0461	7-11a	6	Not	Yes	Yes
408	2	Periphery of Cusco	50ME08	Fem	36	7	Not	Not	Not	Not	Not	Not	83	1.65	Not	Not	Not	Not	Not	Not	Not	Not	Not	Not	Not	Frequently	Frequently	Never	Sometimes	Never	Frequently	Frequently	Not	27 Sep 20	30.4867	12a+	9	Not	Not	Not
263	2	Periphery of Cusco	66103	Fem	18	8	Not	Not	Not	Not	Not	Not	55	1.53	Yes	Yes	Yes	Not	Not	Yes	Yes	Yes	Yes	Yes	Yes	Always	Always	Sometimes	Frequently	Sometimes	Frequently	Frequently	Yes	19 Sep 20	23.4952	7-11a	10	Not	Yes	Yes
1018- 439	5	Quillabamba	N11	Fem		6	Not	Not	Not	Not	Not	Not	20	1.05	Not	Not	Not	Not	Not	Not	Not	Not	Not	Not	Not	Always	Never	Never	Never	Never	Frequently	Always	Not	14 Sep 20	18.1406	7-11a	6	Not	Yes	Yes
540	2	Cusco	45ER5	Masc	21	5	Not	Not	Not	Not	Not	Not	76	1.66	Not	Not	Not	Not	Not	Not	Not	Not	Not	Not	Not	Always	Always	Never	Sometimes	Never	Always	Always	Not	20 Sep 20	27.5802	7-11a	6	Not	Not	Not
627	4	Cusco	212B31	Fem	23	5	Not	Not	Not	Not	Not	Not	50	1.58	Not	Not	Not	Not	Not	Not	Not	Not	Not	Not	Not	Always	Always	Sometimes	Never	Never	Always	Always	Not	26 Sep 20	20.0288	12a+	6	Not	Not	Not
612	1	Periphery of Cusco	25-A-28	Fem	20	1	Not	Not	Not	Not	Not	Not	70	1.53	Not	Not	Not	Yes	Not	Not	Not	Yes	Yes	Not	Not	Frequently	Frequently	Never	Sometimes	Never	Frequently	Always	Not	26 Sep 20	29.903		6		Not	Not
74	3	Periphery of Cusco	442A	Fem	51	6	Yes	Not	Not	Not	Not	Not	86		Not	Yes	Yes	Not	Not	Not	Not	Not	Not	Not	Not	Frequently	Frequently	Frequently	Frequently	Never	Sometimes	Sometimes	Yes	14 Sep 20		12a+	7	Not	Yes	Yes
304	5	Cusco	45ER23	Masc	25	5	Not	Not	Not	Not	Not	Not	70	1.75	Not	Yes	Yes	Not	Not	Yes	Not	Not	Yes	Not	Not	Always	Always	Sometimes	Never	Never	Always	Always	Yes	20 Sep 20	22.8571	7-11a	8	Yes	Yes	Yes
257	2	Periphery of Cusco	77011	Masc	44	4	Not	Not	Not	Not	Not	Not	95	1.65	Not	Not	Not	Not	Not	Yes	Not	Not	Yes	Not	Not	Always	Always	Never		Never	Always	Always	Not	19 Sep 20	34.8944	<7a	6	Not	Not	Not
527	3	Cusco	45ANT03	Fem	47	3	Not	Not	Not	Not	Not	Not	67	1.55	Not	Not	Not	Not	Not	Not	Not	Yes	Not	Not	Not	Frequently	Always	Never	Never	Never	Always	Always	Yes	20 Sep 20	27.8876	7-11a	7	Not	Not	Not
708	5	Periphery of Cusco	45ME05B	Masc	18	5	Not	Not	Not	Not	Not	Not	80	1.7	Yes	Not	Not	Not	Not	Not	Not	Not	Not	Not	Yes	Frequently	Frequently	Never	Sometimes	Never	Frequently	Frequently	Yes	27 Sep 20	27.6817	7-11a	8	Not	Not	Not
15	2	Periphery of Cusco	37	Masc	64	2	Yes	Not	Not	Not	Not	Not	80	1.65	Yes	Not	Not	Not	Not	Not	Not	Not	Not	Not	Not		Always		Frequently		Always	Always	Not		29.3848	7-11a	8	Not	Yes	Yes
61	3	Periphery of Cusco	22.1B	Fem	32	4	Not	Not	Not	Not	Not	Not	55	1.5	Yes	Yes	Yes	Not	Not	Not	Not	Not	Not	Not	Not	Always	Always		Always	Never	Always	Always	Not	14 Sep 20	24.4444	12a+	8	Not	Not	Not
94	5	Periphery of Cusco	22253	Masc	35	5	Not	Not	Not	Not	Not	Not	62	1.69	Not	Not	Not	Not	Not	Not	Not	Not	Not	Not	Not	Frequently	Frequently	Never	Frequently	Never	Frequently	Always	Yes	14 Sep 20	21.7079	7-11a	6		Not	Not
523	2	Cusco	45 ANT 01	Fem	45	3	Not	Not	Not	Not	Not	Not	60	1.55	Not	Not	Yes	Not	Not	Not	Not	Not	Not	Yes	Not	Always	Always	Sometimes	Frequently	Never	Always	Frequently	Yes	20 Sep 20	24.974	12a+	7	Not	Not	Not
1020- 438	2	Quillabamba	N10	Masc	48	7	Not	Not	Not	Not	Not	Not	82	1.49	Not	Not	Not	Not	Not	Not	Not	Not	Not	Not	Not	Frequently	Frequently	Never	Never	Never	Frequently	Always	Not	14 Sep 20	36.9353	7-11a	12	Not	Yes	Not
327	2	Cusco	89-FAMEXT	Fem	27	3	Not	Not	Not	Not	Not	Not	67	1.5	Not	Not	Not	Not	Not	Not	Not	Not	Not	Not	Not	Always	Always	Always	Always	Always	Always	Always	Not	20 Sep 20	29.7778	12a+	13	Not	Not	Yes
328	1	Cusco	2114	Fem	48	4	Not	Not	Not	Not	Not	Not	69	1.55	Not	Not	Yes	Not	Yes	Not	Not	Yes	Yes	Yes	Not	Always	Always		Never	Never	Always	Always	Yes	20 Sep 20	28.7201	12a+	15	Not	Yes	Yes
4	6	Periphery of Cusco	22212	Masc	19	7	Not	Not	Not	Not	Not	Not	59	1.6	Not	Not	Not	Not	Not	Not	Not	Not	Not	Not	Not	Always	Always	Never		Sometimes	Always	Always	Yes	14 Sep 20	23.0469	7-11a	15	Not	Yes	Not
356	6	Cusco	212B01	Fem	23	7	Not	Not	Not	Not	Not	Not	68	1.65	Not	Not	Not	Not	Not	Not	Not	Yes	Not	Yes	Not	Always	Always	Frequently	Sometimes	Never	Always	Always	Yes	26 Sep 20	24.977	12a+	13	Not	Yes	Yes
704	1	Cusco	45ME16	Masc	48	6	Not	Not	Not	Not	Not	Not	75	1.8	Not	Not	Not	Not	Not	Not	Not	Not	Not	Not	Not	Frequently	Frequently	Never	Sometimes	Never	Frequently	Frequently	Yes	27 Sep 20	23.1482	12a+	11	Not	Not	Not
28	2	Periphery of Cusco	4412	Fem	70	8	Not	Not	Not	Not	Not	Not	56	1.6	Not	Not	Not	Not	Not	Not	Not	Not	Not	Not	Not	Always	Always	Never	Always	Never	Always	Always	Not	14 Sep 20	21.875	12a+	13	Not	Not	Not
364	1	Cusco	452B23	Masc	64	6	Not	Not	Not	Not	Not	Not	79	1.66	Not	Not	Not	Not	Not	Not	Not	Not	Yes	Not	Not	Always	Always	Never	Frequently		Always	Always	Yes	26 Sep 20	28.6689	12a+	11	Yes	Yes	Yes
325	2	Cusco	89	Masc	35	8	Not	Yes	Not	Not	Not	Not	58	1.61	Not	Yes	Not	Not	Not	Not	Not	Not	Not	Not	Not							Sometimes	Yes	20 Sep 20	22.3757	12a+	13	Not	Not	Not
326	5	Cusco	89-FAMEXT	Fem	26	8	Not	Not	Not	Not	Not	Not	54		Not	Not	Not	Not	Not	Not	Not	Not	Not	Not	Not	Always	Always	Always	Always	Always	Always	Always	Not	20 Sep 20		<7a	13	Not	Not	Yes
1020- 438	3	Quillabamba	N10	Fem		7	Not	Not	Not	Not	Not	Not	70	1.6	Not	Not	Not	Not	Not	Not	Not	Not	Not	Not	Not	Frequently	Frequently	Never	Never	Never	Frequently	Always	Not	14 Sep 20	27.3438	7-11a	12	Not	Yes	Not
392	2	Cusco	sector 4	Fem	40	2	Not	Not	Not	Not	Not	Not	85	1.6	Not	Not	Not	Not	Not	Not	Not	Not	Not	Not	Not	Always	Always	Always	Always	Sometimes	Frequently	Always	Not	27 Sep 20	33.2031	7-11a	13	Not	Not	Not
4	5	Periphery of Cusco	22212	Fem	18	7	Not	Not	Not	Not	Not	Not	57	1.58	Not	Not	Not	Not	Not	Not	Not	Not	Not	Not	Not	Always	Always	Never		Sometimes	Always	Always	Yes	14 Sep 20	22.8329	7-11a	15	Not	Yes	Not
355	2	Periphery of Cusco	29031	Masc	39	4	Not	Not	Not	Not	Not	Not	88	1.8	Not	Not	Not	Not	Not	Not	Not	Not	Not	Not	Not	Always	Always	Always	Sometimes	Never	Always	Always	Not	26 Sep 20	27.1605	12a+	12	Not	Not	Not
293	4	Periphery of Cusco	293-1.10	Fem	42	10	Not	Not	Not	Not	Yes	Not	65	1.65	Yes	Yes	Not	Not	Not	Yes	Not	Yes	Yes	Yes	Not	Always	Always	Always	Always		Always	Always	Not	20 Sep 20	23.8751	12a+	13	Not	Not	Not
393	2	Cusco	89	Fem	26	3	Not	Not	Not	Not	Not	Not	65	1.56	Not	Not	Yes	Not	Not	Yes	Not	Not	Yes	Yes	Not	Frequently	Always		Always	Frequently	Frequently	Always	Not	27 Sep 20	26.7094	12a+	11	Not	Not	Not
107	3	Periphery of Cusco	3821	Fem	20	10	Not	Yes	Not	Not	Not	Not	45	1.64	Not	Not	Not	Not	Yes	Yes	Not	Not	Yes	Yes	Not	Always	Always		Frequently	Never	Always	Always	Yes	14 Sep 20	16.7311	7-11a	14	Not	Yes	Yes
325	6	Cusco	89	Fem	34	8	Yes	Not	Yes	Not	Not	Not	64	1.55	Yes	Yes	Yes	Not	Not	Yes	Not	Not	Yes	Yes	Not	Always	Frequently	Sometimes	Sometimes	Sometimes	Frequently	Always	Yes	20 Sep 20	26.6389	7-11a	13	Not	Not	Not
4	2	Periphery of Cusco	22212	Fem	42	7	Not	Not	Not	Not	Not	Not	68	1.59	Not	Not	Yes	Not	Yes	Not	Not	Not	Yes	Not	Yes	Frequently	Frequently	Frequently	Frequently	Frequently	Frequently	Frequently	Yes	14 Sep 20	26.8977	7-11a	15	Not	Yes	Not
827	2	Cusco	45kg11A	Masc	21	7	Not	Not	Not	Not	Not	Not	70	1.68	Not	Not	Not	Not	Not	Not	Not	Not	Yes	Not	Not	Frequently	Always	Frequently	Frequently	Sometimes	Always	Always	Not	27 Sep 20	24.8016	12a+	11	Yes	Yes	Yes
355	1	Periphery of Cusco	29031	Masc	63	4	Not	Not	Not	Not	Not	Not	83	1.64	Not	Not	Not	Not	Not	Not	Not	Not	Not	Not	Not	Always	Always	Always	Always	Never	Always	Always	Not	26 Sep 20	30.8596	12a+	12	Not	Not	Not
364	6	Cusco	452B23	Fem	33	6	Not	Not	Not	Not	Not	Not	82	1.66	Not	Not	Yes	Not	Not	Not	Not	Not	Yes	Not	Not	Always	Always	Never	Never	Never	Always	Always	Not	26 Sep 20	29.7576	12a+	11	Yes	Yes	Yes
364	5	Cusco	452B23	Fem	37	6	Not	Not	Not	Not	Not	Not	68	1.65	Yes	Yes	Not	Not	Not	Yes	Not	Not	Yes	Not	Not	Always	Always	Never	Frequently	Never	Always	Always	Yes	26 Sep 20	24.977	12a+	11	Yes	Yes	Yes
266	1	Periphery of Cusco	77052	Fem	39	3	Not	Not	Not	Not	Not	Yes	56	1.57	Yes	Not	Not	Yes	Not	Not	Not	Not	Not	Not	Not	Always	Always	Never	Always	Never	Always	Always	Not	19 Sep 20	22.719	12a+	12	Not	Not	Not
410	1	Periphery of Cusco	50DR31	Masc	40	8	Not	Not	Not	Not	Not	Not	60	1.68	Not	Not	Not	Not	Not	Not	Not	Not	Yes	Not	Not	Always	Always	Never	Never	Never	Always	Always	Not	27 Sep 20	21.2585	12a+	12	Yes	Yes	Yes
107	9	Periphery of Cusco	3821	Masc	56	10	Not	Not	Not	Not	Not	Not	80	1.7	Yes	Yes	Not	Not	Yes	Yes	Not	Not	Not	Not	Yes	Always	Always		Always		Always	Always	Yes	14 Sep 20	27.6817	12a+	14	Not	Yes	Yes
328	3	Cusco	2114	Masc	30	4	Not	Not	Not	Not	Not	Not	80	1.65	Not	Not	Not	Not	Not	Not	Yes	Not	Yes	Yes	Not	Always	Always	Never	Sometimes	Never	Always	Always	Not	20 Sep 20	29.3848	12a+	15	Not	Yes	Yes
293	10	Periphery of Cusco	293-1.10	Fem	76	10	Not	Not	Not	Not	Yes	Not			Not	Not	Not	Not	Not	Not	Not	Yes	Not	Yes	Not	Always	Always		Always		Always	Always	Not	20 Sep 20		7-11a	13	Not	Not	Not
410	4	Periphery of Cusco	50DR31	Masc	73	8	Yes	Not	Not	Not	Not	Not			Not	Not	Not	Not	Not	Not	Not	Not	Not	Not	Not	Always	Always	Never	Frequently	Sometimes	Always	Always	Yes	27 Sep 20		12a+	12	Yes	Yes	Yes
704	5	Cusco	45ME16	Fem	41	6	Not	Not	Not	Not	Not	Not	75	1.6	Not	Not	Not	Not	Not	Not	Not	Not	Yes	Not	Not	Always	Always	Never	Frequently	Never	Always	Always	Not	27 Sep 20	29.2969	12a+	11	Not	Not	Not
501	8	Cusco	2115	Masc	60	8	Not	Not	Yes	Not		Not	65	1.65	Not	Not	Not	Not	Not	Not	Not	Not	Yes	Not	Not	Frequently	Always	Always	Always		Always	Frequently	Not	20 Sep 20	23.8751	12a+	15	Not	Not	Not
293	1	Periphery of Cusco	293-1.10	Masc	79	10	Not	Not	Not	Not	Not	Not	65	1.65	Not	Not	Not	Not	Not	Not	Not	Yes	Not	Yes	Not	Always	Always	Never	Always		Always	Always	Not	20 Sep 20	23.8751	12a+	13	Not	Not	Not
354	6	Periphery of Cusco	29011	Fem	40	9	Not	Not	Not	Not	Not	Not	65	1.65	Not	Yes	Not	Not	Not	Not	Not	Not	Yes	Not	Not	Frequently	Always	Never	Frequently	Sometimes	Always	Always	Not	26 Sep 20	23.8751	12a+	12	Not	Yes	Yes
354	2	Periphery of Cusco	29011	Fem	39	9	Not	Not	Not	Not	Not	Not	56	1.57	Not	Not	Yes	Not	Not	Not	Yes	Not	Not	Yes	Yes	Frequently	Always	Always	Frequently	Sometimes	Always	Always	Yes	26 Sep 20	22.719	12a+	12	Not	Yes	Yes
325	1	Cusco	89	Masc	53	8	Not	Not	Not	Not	Not	Not	70	1.7	Not	Not	Not	Not	Yes	Not	Not	Not	Not	Not	Not	Always	Always	Frequently	Sometimes		Always	Always	Not	20 Sep 20	24.2215	12a+	13	Not	Not	Not
356	7	Cusco	212B01	Masc	66	7	Not	Not	Not	Not	Not	Not	70	1.65	Not	Not	Not	Not	Not	Not	Not	Not	Not	Not	Not	Always	Always	Sometimes	Sometimes	Never	Always	Always	Yes	26 Sep 20	25.7117	7-11a	13	Not	Yes	Yes
704	6	Cusco	45ME16	Masc	25	6	Not	Not	Not	Not	Not	Not	82	1.78	Not	Not	Not	Not	Not	Not	Not	Not	Yes	Not	Not	Frequently	Frequently	Never	Never	Never	Frequently	Frequently	Not	27 Sep 20	25.8806	12a+	11	Not	Not	Not
266	2	Periphery of Cusco	77052	Masc	40	3	Not	Not	Not	Not	Not	Not	42	1.53	Not	Yes	Not	Not	Not	Yes	Not	Not	Yes	Not	Not	Frequently	Always	Never	Frequently	Never	Frequently	Frequently	Yes	19 Sep 20	17.9418	7-11a	12	Not	Not	Not
168	1	Quillabamba	19	Masc	27	3	Not	Not	Not	Not	Not	Not	78	1.72	Yes	Not	Not	Not	Not	Not	Not	Not	Not	Not	Not	Always	Always	Never	Frequently	Never	Always	Always	Yes	14 Sep 20	26.3656	12a+	16	Not	Yes	Not
107	10	Periphery of Cusco	3821	Masc	40	10	Not	Not	Not	Not	Not	Not	80	1.78	Not	Yes	Not	Not	Not	Yes	Not	Not	Yes	Yes	Not	Always	Always	Always	Always		Always	Always	Yes	14 Sep 20	25.2493	12a+	14	Not	Yes	Yes
355	3	Periphery of Cusco	29031	Fem	38	4	Not	Not	Not	Not	Not	Not	65	1.57	Not	Yes	Not	Not	Not	Not	Yes	Not	Yes	Yes	Not	Always	Always	Frequently	Sometimes	Sometimes	Always	Always	Not	26 Sep 20	26.3702	12a+	12	Not	Not	Not
704	2	Cusco	45ME16	Fem	74	6	Not	Not	Not	Not	Not	Not	67	1.6	Not	Not	Not	Not	Not	Not	Not	Not	Not	Not	Not	Frequently	Frequently	Never	Sometimes	Never	Frequently	Frequently	Not	27 Sep 20	26.1719	<7a	11	Not	Not	Not
24	1	Periphery of Cusco	493A3	Masc	54	6	Not	Not	Not	Not	Not	Not	73	1.68	Yes	Not	Not	Not	Yes	Not	Not	Not	Yes	Not	Not	Always	Always	Always	Frequently	Never	Frequently	Frequently	Not	14 Sep 20	25.8645	7-11a	16	Not	Not	Yes
3	2	Periphery of Cusco	22213	Masc	64	9	Not	Not	Yes	Not	Not	Not	70	1.55	Not	Not	Yes	Not	Not	Not	Not	Not	Not	Not	Not	Frequently	Frequently	Never	Never	Never	Frequently	Frequently	Yes	14 Sep 20	29.1363	7-11a	20	Not	Yes	Not
4	7	Periphery of Cusco	22212	Masc	41	7	Not	Not	Not	Not	Not	Not	78	1.7	Not	Not	Not	Not	Not	Not	Not	Not	Not	Not	Not	Always	Always	Never	Always	Never	Always	Always	Yes	14 Sep 20	26.9896	7-11a	15	Not	Yes	Not
129	1	Periphery of Cusco	4452B	Masc	39	7	Not	Not	Not	Not	Not	Not	64	1.58	Yes	Not	Not	Not	Not	Not	Not	Not	Not	Not	Not	Always	Always	Sometimes	Always	Never	Always	Always	Yes	14 Sep 20	25.6369	<7a	13	Not	Not	Not
827	1	Cusco	45kg11A	Masc	51	7	Not	Not	Not	Not	Not	Not	78	1.68	Not	Yes	Yes	Yes	Yes	Yes	Yes	Yes	Not	Yes	Not	Always	Always	Always		Always	Always	Always	Yes	27 Sep 20	27.6361	7-11a	11	Yes	Yes	Yes
129	3	Periphery of Cusco	4452B	Masc	37	7	Not	Not	Not	Not	Not	Not	64	1.68	Not	Not	Not	Not	Not	Not	Not	Not	Not	Not	Not	Always	Always	Never	Always	Never	Always	Always	Yes	14 Sep 20	22.6757	7-11a	13	Not	Not	Not
40	8	Cusco	3054A	Masc	45	11	Not	Not	Not	Not	Not	Not	130	1.82	Not	Not	Not	Not	Not	Not	Not	Not	Not	Not	Not						Always	Always	Not	14 Sep 20	39.2465	12a+	14	Not	Not	Yes
827	6	Cusco	45kg11A	Masc	40	7	Not	Not	Not	Not	Not	Not	98	1.7	Not	Yes	Yes	Yes	Yes	Yes	Yes	Not	Yes	Yes	Yes	Frequently	Always	Sometimes	Sometimes	Sometimes	Always	Always	Yes	27 Sep 20	33.91	12a+	11	Yes	Yes	Yes
41	1	Cusco	3054B	Masc	70	2	Yes	Not	Not	Not	Not	Not	82	1.75	Not	Not	Not	Not	Not	Not	Not	Not	Not	Not	Not	Always	Always	Never	Always	Never	Always	Always	Not	14 Sep 20	26.7755	12a+	14	Not	Not	Yes
129	5	Periphery of Cusco	4452B	Masc	28	7	Not	Not	Not	Not	Not	Not	60	1.58	Not	Not	Not	Not	Not	Not	Not	Not	Not	Not	Not	Always	Always	Always	Always	Never	Always	Frequently	Yes	14 Sep 20	24.0346	12a+	13	Not	Not	Not
356	1	Cusco	212B01	Fem	40	7	Not	Not	Not	Not	Not	Not	78	1.68	Yes	Not	Yes	Not	Not	Not	Not	Not	Yes	Not	Not	Always	Always	Sometimes	Frequently	Sometimes	Always	Always	Yes	26 Sep 20	27.6361	12a+	13	Not	Yes	Yes
3	4	Periphery of Cusco	22213	Fem	30	9	Not	Not	Not	Not	Not	Not	59	1.55	Not	Not	Not	Not	Not	Not	Not	Not	Yes	Not	Yes	Always	Always	Always	Frequently	Never	Always	Always	Yes	14 Sep 20	24.5577	12a+	20	Not	Yes	Not
410	6	Periphery of Cusco	50DR31	Fem	44	8	Not	Not	Not	Not	Not	Not	85	1.57	Not	Yes	Yes	Not	Not	Not	Not	Not	Yes	Not	Not	Always	Always	Never	Frequently	Never	Always	Always	Yes	27 Sep 20	34.4842	12a+	12	Yes	Yes	Yes
726	2	Cusco	45DR22	Masc	51	5	Yes	Yes	Not	Not	Not	Not	67	1.67	Not	Not	Not	Not	Not	Not	Not	Not	Not	Not	Not	Always	Always	Never	Frequently	Never	Always	Always	Not	27 Sep 20	24.0238	7-11a	12	Not	Yes	Yes
237	1	Periphery of Cusco	5543	Fem	56	8	Not	Not	Not	Not	Not	Not	90	1.55	Not	Yes	Yes	Not	Not	Not	Not	Not	Yes	Not	Not	Always	Always	Frequently	Sometimes	Frequently	Always	Always	Not	19 Sep 20	37.461	12a+	17	Not	Yes	Yes
534	4	Cusco	45ERI4	Fem	34	4	Not	Not	Not	Not	Not	Not	52	1.6	Yes	Not	Not	Not	Not	Not	Not	Yes	Not	Not	Not	Always	Always	Sometimes	Sometimes	Never	Always	Always	Yes	20 Sep 20	20.3125	12a+	11	Not	Not	Yes
40	4	Cusco	3054A	Masc	22	11	Not	Not	Not	Not	Not	Not	69	1.67	Not	Not	Not	Not	Not	Yes	Not	Not	Yes	Not	Not	Always	Always	Always	Always	Never	Always	Always	Not	14 Sep 20	24.7409	12a+	14	Not	Not	Yes
354	3	Periphery of Cusco	29011	Masc	75	9	Yes	Yes	Not	Not	Not	Not			Not	Not	Not	Not	Not	Not	Not	Not	Not	Yes	Not	Sometimes	Frequently	Frequently	Sometimes	Never	Always	Always	Not	26 Sep 20		<7a	12	Not	Yes	Yes
238	2	Periphery of Cusco	5543	Masc	39	2	Not	Not	Not	Not	Not	Not	115	1.74	Not	Not	Yes	Not	Not	Not	Not	Not	Yes	Not	Not	Always	Always	Frequently	Sometimes	Sometimes	Always	Always	Not	19 Sep 20	37.9839	12a+	16	Not	Yes	Yes
305	1	Cusco	45ER24	Fem	40	3	Not	Not	Not	Not	Not	Not	50	1.5	Not	Not	Not	Not	Not	Not	Yes	Not	Yes	Not	Yes	Always	Always	Never	Frequently	Never	Always	Always	Yes	20 Sep 20	22.2222	12a+	12	Not	Not	Not
354	9	Periphery of Cusco	29011	Masc	42	9	Not	Not	Not	Not	Not	Not			Not	Yes	Not	Not	Not	Not	Not	Not	Yes	Not	Not	Frequently	Always		Sometimes	Sometimes	Always	Always	Not	26 Sep 20		12a+	12	Not	Yes	Yes
1021 - 435	4	Quillabamba	N7	Masc	33	5	Not	Not	Not	Not	Not	Not	65	1.55	Not	Not	Not	Not	Not	Not	Not	Not	Not	Not	Not								Not	14 Sep 20	27.0552	7-11a	12	Not	Not	Not
40	6	Cusco	3054A	Fem	57	11	Yes	Yes	Not	Not	Not	Not	89	1.67	Not	Yes	Not	Not	Not	Not	Not	Not	Yes	Not	Not						Always	Always	Not	14 Sep 20	31.9122	12a+	14	Not	Not	Yes
3	3	Periphery of Cusco	22213	Fem	62	9	Not	Yes	Not	Not	Not	Not	60	1.5	Not	Not	Not	Not	Not	Not	Yes	Not	Not	Not	Not	Frequently	Always	Never	Never	Never	Always	Frequently	Not	14 Sep 20	26.6667	<7a	20	Not	Yes	Not
1502	1	Quillabamba	2002	Fem	50	2	Not	Not	Not	Not	Not	Not	76	1.51	Not	Not	Not	Not	Not	Not	Not	Not	Not	Not	Not	Frequently	Frequently	Sometimes	Frequently	Sometimes	Frequently	Always	Not	14 Sep 20	33.3319	12a+	18	Not	Not	Not
356	4	Cusco	212B01	Masc	49	7	Not	Not	Not	Not	Not	Not	80	1.72	Yes	Not	Yes	Not	Not	Yes	Not	Not	Yes	Not	Yes	Always	Always	Sometimes	Frequently	Never	Always	Always	Yes	26 Sep 20	27.0417	12a+	13	Not	Yes	Yes
354	7	Periphery of Cusco	29011	Masc	21	9	Not	Not	Not	Not	Not	Not	64	1.73	Yes	Yes	Yes	Yes	Not	Not	Not	Yes	Yes	Not	Yes	Always	Always	Always	Sometimes	Never	Always	Frequently	Yes	26 Sep 20	21.3839	7-11a	12	Not	Yes	Yes
326	6	Cusco	89-FAMEXT	Fem	23	8	Not	Not	Not	Not	Not	Not	63	1.67	Not	Not	Yes	Not	Not	Not	Yes	Not	Yes	Not	Not	Always	Always		Sometimes	Never	Always	Always	Not	20 Sep 20	22.5895	12a+	13	Not	Not	Yes
827	3	Cusco	45kg11A	Fem	50	7	Not	Not	Not	Not	Not	Not	70	1.55	Not	Not	Yes	Not	Yes	Not	Not	Not	Yes	Not	Not	Sometimes		Frequently	Frequently	Always	Always	Always	Yes	27 Sep 20	29.1363	7-11a	11	Yes	Yes	Yes
326	1	Cusco	89-FAMEXT	Masc	59	8	Yes	Not	Not	Yes	Not	Not	62	1.66	Yes	Not	Not	Not	Not	Not	Not	Not	Not	Not	Not	Always	Always	Always	Always		Always	Always	Not	20 Sep 20	22.4996	7-11a	13	Not	Not	Yes
315	2	Cusco	45DR3	Fem	38	2	Not	Not	Not	Not	Not	Not		1.52	Not	Not	Not	Not	Not	Not	Not	Not	Not	Not	Not		Frequently				Frequently		Yes	20 Sep 20		7-11a	11	Not	Not	Not
1020- 438	5	Quillabamba	N10	Fem	43	7	Not	Not	Not	Not	Not	Not	80	1.53	Not	Not	Not	Not	Not	Not	Not	Not	Not	Not	Not	Frequently	Frequently	Never	Never	Never	Always	Frequently	Yes	14 Sep 20	34.1749		12	Not	Yes	Not
28	4	Periphery of Cusco	4412	Fem	48	8	Not	Not	Not	Not	Not	Not	57	1.57	Not	Not	Not	Not	Not	Not	Not	Not	Not	Not	Not	Always	Always	Never	Always	Never	Always	Always	Not	14 Sep 20	23.1247	7-11a	13	Not	Not	Not
180	1	Quillabamba	7	Fem	64	5	Yes	Not	Not	Not	Not	Not	82	1.56	Not	Yes	Not	Not	Not	Not	Not	Not	Not	Not	Not	Always	Always	Never	Never	Never	Always	Always	Not	14 Sep 20	33.6949	<7a	11	Not	Yes	Not
129	6	Periphery of Cusco	4452B	Fem	24	7	Not	Not	Not	Not	Not	Not	55	1.55	Not	Not	Not	Not	Not	Not	Not	Yes	Not	Not	Not	Always	Always	Always	Always	Never	Always	Always	Not	14 Sep 20	22.8928	7-11a	13	Not	Not	Not
410	5	Periphery of Cusco	50DR31	Masc	47	8	Not	Not	Not	Not	Not	Not	70	1.7	Not	Not	Not	Not	Not	Not	Not	Not	Not	Not	Not	Always	Always	Sometimes	Frequently	Never	Always	Always	Not	27 Sep 20	24.2215	12a+	12	Yes	Yes	Yes
501	3	Cusco	2115	Masc		8	Not	Not	Not	Not	Not	Not	70	1.7	Not	Not	Not	Not	Not	Not	Not	Not	Not	Not	Not	Always	Always	Always	Always		Always	Always	Not	20 Sep 20	24.2215	12a+	15	Not	Not	Not
28	1	Periphery of Cusco	4412	Masc	75	8	Yes	Not	Not	Yes	Not	Not	62	1.65	Not	Not	Not	Not	Not	Not	Not	Yes	Not	Not	Not	Always	Always	Never	Never	Never	Always	Always	Not	14 Sep 20	22.7732	12a+	13	Not	Not	Not
534	1	Cusco	45ERI4	Fem	55	4	Not	Not	Not	Not	Not	Not	55	1.55	Not	Not	Not	Yes	Not	Yes	Yes	Not	Yes	Yes	Not	Always	Always	Sometimes	Sometimes	Never	Always	Always	Yes	20 Sep 20	22.8928	7-11a	11	Not	Not	Yes
237	8	Periphery of Cusco	5543	Masc	57	8	Not	Not	Not	Not	Not	Not	91	1.7	Not	Not	Yes	Not	Not	Not	Not	Not	Yes	Not	Not	Always	Always	Frequently	Sometimes	Sometimes	Always	Always	Not	19 Sep 20	31.4879	12a+	17	Not	Yes	Yes
40	9	Cusco	3054A	Fem	19	11	Not	Not	Not	Not	Not	Not	53	1.65	Yes	Not	Not	Not	Not	Not	Not	Not	Yes	Not	Not	Always	Always	Never	Never	Never	Always	Sometimes	Not	14 Sep 20	19.4674	12a+	14	Not	Not	Yes
3	5	Periphery of Cusco	22213	Masc	20	9	Not	Not	Not	Not	Not	Not	84	1.6	Yes	Not	Not	Not	Not	Not	Not	Not	Not	Not	Not	Always	Always	Sometimes	Always	Sometimes	Always	Frequently	Yes	14 Sep 20	32.8125	7-11a	20	Not	Yes	Not
40	2	Cusco	3054A	Fem	32	11	Not	Not	Not	Not	Not	Not	91	1.57	Not	Not	Not	Not	Not	Not	Not	Not	Yes	Not	Not	Always	Always	Never	Always	Never	Always	Always	Not	14 Sep 20	36.9183	12a+	14	Not	Not	Yes
24	4	Periphery of Cusco	493A3	Masc	21	6	Not	Not	Not	Not	Not	Not	66	1.75	Not	Not	Not	Not	Not	Not	Not	Not	Yes	Not	Not	Frequently	Always	Never	Never	Never	Always	Always	Not	14 Sep 20	21.551	7-11a	16	Not	Not	Yes
107	1	Periphery of Cusco	3821	Fem	46	10	Not	Not	Not	Not	Not	Not	54	1.61	Not	Not	Yes	Not	Not	Not	Not	Yes	Not	Not	Not	Always	Always	Sometimes	Sometimes	Never	Always	Always	Not	14 Sep 20	20.8325	12a+	14	Not	Yes	Yes
293	8	Periphery of Cusco	293-1.10	Fem	50	10	Not	Not	Not	Not	Not	Not	68	1.55	Not	Not	Not	Not	Not	Not	Not	Yes	Yes	Not	Not	Always	Always	Never	Always	Never	Always	Always	Not	20 Sep 20	28.3039	12a+	13	Not	Not	Not
325	7	Cusco	89	Fem	25	8	Not	Not	Not	Not	Not	Not	51		Not	Not	Not	Not	Not	Not	Not	Not	Yes	Not	Not	Frequently	Always	Never	Always	Frequently	Always	Always	Not	20 Sep 20		12a+	13	Not	Not	Not
1020- 438	6	Quillabamba	N10	Masc	23	7	Not	Not	Not	Not	Not	Not	58	1.64	Not	Not	Not	Not	Not	Not	Not	Not	Not	Not	Not	Frequently	Frequently	Never	Never	Never	Frequently	Always	Not	14 Sep 20	21.5645	7-11a	12	Not	Yes	Not
326	2	Cusco	89-FAMEXT	Fem	56	8	Yes	Yes	Not	Not	Not	Not	65	1.65	Not	Not	Not	Not	Not	Not	Not	Not	Yes	Not	Not	Always	Always		Always		Always	Always	Yes	20 Sep 20	23.8751	<7a	13	Not	Not	Yes
726	3	Cusco	45DR22	Fem	32	5	Not	Not	Not	Not	Not	Not	65	1.61	Not	Not	Not	Not	Yes	Not	Not	Not	Not	Not	Not	Always	Always	Frequently	Frequently	Never	Always	Always	Yes	27 Sep 20	25.0762	12a+	12	Not	Yes	Yes
325	5	Cusco	89	Fem	38	8	Yes	Not	Not	Not	Not	Not	49	1.5	Not	Not	Yes	Not	Not	Not	Not	Yes	Yes	Yes	Yes	Sometimes	Always	Never	Sometimes	Never	Frequently		Yes	20 Sep 20	21.7778	12a+	13	Not	Not	Not
3	1	Periphery of Cusco	22213	Masc	35	9	Not	Not	Not	Not	Not	Not	70	1.58	Not	Not	Yes	Not	Not	Not	Not	Yes	Not	Not	Not	Always	Always	Never	Sometimes	Sometimes	Always	Frequently	Yes	14 Sep 20	28.0404	7-11a	20	Not	Yes	Not
393	3	Cusco	89	Fem	50	3	Not	Not	Not	Not	Not	Not	63	1.55	Not	Yes	Not	Not	Not	Not	Not	Yes	Yes	Not	Not	Sometimes	Always		Sometimes	Never		Frequently	Not	27 Sep 20	26.2227	7-11a	11	Not	Not	Not
4	1	Periphery of Cusco	22212	Masc	77	7	Not	Not	Not	Not	Not	Not	70	1.75	Not	Not	Not	Not	Not	Not	Not	Not	Not	Not	Not	Frequently	Always	Never	Sometimes	Never	Frequently	Frequently	Yes	14 Sep 20	22.8571	<7a	15	Not	Yes	Not
501	4	Cusco	2115	Fem	32	8	Not	Not	Not	Not	Not	Not	60	1.65	Yes	Not	Yes	Not	Not	Yes	Not	Yes	Not	Not	Not	Always	Always		Always	Never	Always	Always	Not	20 Sep 20	22.0386	12a+	15	Not	Not	Not
28	3	Periphery of Cusco	4412	Masc	53	8	Not	Not	Yes	Not	Not	Not	67	1.67	Not	Yes	Not	Not	Not	Not	Not	Not	Not	Not	Not	Always	Always	Never	Always	Never	Always	Always	Not	14 Sep 20	24.0238	12a+	13	Not	Not	Not
3	9	Periphery of Cusco	22213	Masc	44	9	Not	Not	Not	Not	Not	Not			Not	Not	Yes	Not	Not	Yes	Not	Not	Not	Not	Not	Frequently	Always	Sometimes	Frequently	Never	Frequently	Frequently	Yes	14 Sep 20		7-11a	20	Not	Yes	Not
168	3	Quillabamba	19	Fem	45	3	Not	Not	Not	Not	Not	Not	48	1.55	Yes	Yes	Not	Not	Not	Not	Yes	Not	Yes	Yes	Not	Always	Always	Never	Sometimes	Never	Always	Always	Not	14 Sep 20	19.9792	12a+	16	Not	Yes	Not
107	7	Periphery of Cusco	3821	Fem	19	10	Not	Not	Not	Not	Not	Not	53	1.52	Not	Not	Not	Not	Not	Not	Not	Yes	Not	Not	Not	Always	Always	Always	Always		Always	Always	Yes	14 Sep 20	22.9398	12a+	14	Not	Yes	Yes
28	6	Periphery of Cusco	4412	Fem	33	8	Not	Not	Not	Not	Not	Not	48	1.6	Not	Not	Not	Not	Not	Not	Not	Not	Yes	Not	Not	Always	Always	Never	Always	Never	Always	Always	Not	14 Sep 20	18.75	12a+	13	Not	Not	Not
534	2	Cusco	45ERI4	Fem	31	4	Not	Not	Not	Not	Not	Not	57	1.59	Not	Not	Yes	Not	Not	Yes	Yes	Not	Yes	Not	Yes	Always	Always	Sometimes	Frequently	Sometimes	Always	Always	Not	20 Sep 20	22.5466	12a+	11	Not	Not	Yes
180	4	Quillabamba	7	Masc	58	5	Not	Not	Not	Not	Not	Not	90	1.66	Not	Not	Not	Not	Not	Not	Not	Not	Yes	Not	Not	Always	Always	Frequently	Never	Never	Always	Always	Not	14 Sep 20	32.6608	12a+	11	Not	Yes	Not
28	5	Periphery of Cusco	4412	Masc	33	8	Not	Not	Not	Not	Not	Not	76	1.73	Not	Not	Not	Not	Not	Not	Not	Not	Not	Yes	Not	Always	Always	Frequently	Always	Always	Always	Always	Not	14 Sep 20	25.3934	12a+	13	Not	Not	Not
180	3	Quillabamba	7	Fem	40	5	Not	Not	Not	Not	Not	Not	90	1.6	Not	Yes	Not	Not	Not	Not	Not	Not	Not	Not	Not	Always	Always	Never	Never	Never	Always	Always	Not	14 Sep 20	35.1562	12a+	11	Not	Yes	Not
315	1	Cusco	45DR3	Fem	78	2	Not	Not	Not	Not	Not	Not	37	1.48	Not	Not	Not	Not	Not	Not	Not	Not	Not	Not	Not		Frequently				Frequently		Not	20 Sep 20	16.8919	<7a	11	Not	Not	Not
40	3	Cusco	3054A	Masc	28	11	Not	Not	Not	Not	Not	Not	75	1.65	Yes	Yes	Not	Not	Not	Not	Not	Not	Yes	Not	Not	Always	Always	Always	Always		Always	Always	Not	14 Sep 20	27.5482	12a+	14	Not	Not	Yes
293	5	Periphery of Cusco	293-1.10	Masc	46	10	Not	Not	Not	Not	Not	Not	75	1.73	Not	Not	Not	Not	Not	Not	Not	Not	Not	Not	Not	Frequently	Always	Never	Always	Never	Sometimes	Always	Not	20 Sep 20	25.0593	12a+	13	Not	Not	Not
704	4	Cusco	45ME16	Fem	25	6	Not	Not	Not	Not	Not	Not	45	1.5	Not	Not	Not	Not	Not	Yes	Not	Not	Not	Not	Not	Frequently	Frequently	Never	Sometimes	Never	Frequently	Frequently	Not	27 Sep 20	20	12a+	11	Not	Not	Not
326	4	Cusco	89-FAMEXT	Masc	28	8	Not	Not	Not	Not	Not	Not			Not	Not	Not	Not	Not	Not	Not	Not	Not	Not	Not	Always	Always	Always	Always				Not	20 Sep 20		7-11a	13	Not	Not	Yes
4	4	Periphery of Cusco	22212	Fem	41	7	Not	Not	Not	Not		Not	67	1.55	Not	Not	Not	Not	Not	Not	Not	Not	Not	Not	Not	Always	Always	Never	Frequently	Never	Always	Always	Yes	14 Sep 20	27.8876	7-11a	15	Not	Yes	Not
326	7	Cusco	89-FAMEXT	Fem	21	8	Not	Not	Not	Not	Not	Not	54	1.57	Not	Not	Not	Not	Yes	Not	Not	Not	Yes	Not	Not	Always	Always		Frequently		Always	Always	Not	20 Sep 20	21.9076	12a+	13	Not	Not	Yes
237	5	Periphery of Cusco	5543	Masc	19	8	Not	Not	Not	Not	Not	Not	54	1.7	Yes	Not	Not	Not	Not	Not	Not	Not	Not	Not	Not	Always	Always	Never	Always	Never	Frequently	Frequently	Not	19 Sep 20	18.6851	7-11a	17	Not	Yes	Yes
726	4	Cusco	45DR22	Fem	28	5	Not	Not	Not	Not	Not	Not	57	1.62	Not	Not	Not	Not	Not	Not	Not	Not	Yes	Not	Not	Always	Always	Never	Frequently	Never	Always	Always	Not	27 Sep 20	21.7192	12a+	12	Not	Yes	Yes
827	7	Cusco	45kg11A	Masc	42	7	Not	Not	Not	Not	Not	Not	60	1.52	Not	Yes	Not	Not	Not	Not	Not	Not	Yes	Not	Not	Frequently	Always	Never	Frequently	Never	Always	Frequently	Yes	27 Sep 20	25.9695	12a+	11	Yes	Yes	Yes
364	4	Cusco	452B23	Masc	34	6	Not	Not	Not	Not	Not	Not	70	1.77	Not	Not	Not	Not	Not	Not	Not	Not	Not	Not	Not	Always	Always	Never	Never	Never	Always	Always	Not	26 Sep 20	22.3435	12a+	11	Yes	Yes	Yes
107	8	Periphery of Cusco	3821	Fem	41	10	Not	Not	Not	Not	Not	Not	55	1.6	Not	Yes	Not	Not	Not	Yes	Not	Not	Yes	Yes	Not	Always	Always	Always	Always		Always	Always	Yes	14 Sep 20	21.4844	12a+	14	Not	Yes	Yes
354	5	Periphery of Cusco	29011	Fem	43	9	Not	Not	Not	Not	Not	Not	72	1.7	Not	Not	Not	Not	Not	Not	Not	Not	Yes	Not	Not	Sometimes	Frequently	Never	Never	Never	Always	Always	Yes	26 Sep 20	24.9135	12a+	12	Not	Yes	Yes
356	2	Cusco	212B01	Masc	75	7	Yes	Not	Not	Not	Not	Not	65	1.66	Yes	Not	Not	Yes	Not	Yes	Yes	Not	Yes	Not	Yes	Always	Always	Sometimes	Sometimes	Never	Always	Always	Yes	26 Sep 20	23.5883	7-11a	13	Not	Yes	Yes
410	8	Periphery of Cusco	50DR31	Fem	31	8	Not	Not	Not	Not	Not	Not	52	1.56	Not	Not	Not	Not	Not	Yes	Not	Not	Not	Not	Not	Always	Always						Not	27 Sep 20	21.3675	12a+	12	Yes	Yes	Yes
827	4	Cusco	45kg11A	Masc	29	7	Not	Not	Not	Not	Not	Not		1.73	Not	Not	Not	Not	Not	Not	Not	Not	Not	Not	Not	Always	Always	Sometimes	Always	Always	Always		Not	27 Sep 20		12a+	11	Yes	Yes	Yes
410	3	Periphery of Cusco	50DR31	Fem	63	8	Yes	Not	Not	Not	Not	Not	105	1.67	Not	Yes	Not	Not	Not	Not	Not	Not	Not	Not	Not	Always	Always		Frequently	Never	Always	Always	Not	27 Sep 20	37.6493	7-11a	12	Yes	Yes	Yes
24	2	Periphery of Cusco	493A3	Fem	47	6	Not	Not	Not	Not	Not	Not	75	1.6	Yes	Yes	Yes	Not	Not	Not	Not	Yes	Yes	Not	Not	Always	Always	Always	Always	Never	Always	Always	Not	14 Sep 20	29.2969	12a+	16	Not	Not	Yes
326	3	Cusco	89-FAMEXT	Masc	33	8	Not	Not	Not	Not	Not	Not	65	1.72	Not	Not	Not	Not	Not	Not	Not	Not	Not	Not	Not	Frequently	Frequently	Sometimes	Sometimes	Never	Always	Always	Not	20 Sep 20	21.9713	12a+	13	Not	Not	Yes
356	5	Cusco	212B01	Masc	71	7	Not	Not	Not	Not	Not	Not	65	1.65	Not	Not	Not	Not	Not	Not	Not	Not	Not	Not	Not	Always	Always	Frequently	Frequently	Never	Always	Always	Yes	26 Sep 20	23.8751	7-11a	13	Not	Yes	Yes
4	3	Periphery of Cusco	22212	Fem	40	7	Not	Not	Not	Not	Not	Not	65	1.64	Not	Yes	Not	Not	Not	Yes	Not	Not	Yes	Yes	Not	Always	Always	Never	Always	Never	Always	Always	Yes	14 Sep 20	24.1672	7-11a	15	Not	Yes	Not
305	3	Cusco	45ER24	Masc	39	3	Not	Not	Not	Not	Not	Not	84	1.78	Not	Not	Yes	Not	Yes	Yes	Not	Not	Not	Not	Not	Always	Always	Never	Always	Never	Always	Always	Not	20 Sep 20	26.5118	12a+	12	Not	Not	Not
328	4	Cusco	2114	Masc	37	4	Not	Not	Not	Not	Not	Not	74	1.65	Not	Not	Yes	Not	Not	Not	Not	Not	Not	Not	Not	Always	Always	Never	Always	Never	Always	Always	Not	20 Sep 20	27.1809	12a+	15	Not	Yes	Yes
827	5	Cusco	45kg11A	Fem	37	7	Not	Not	Not	Not	Not	Not	67	1.56	Not	Not	Not	Not	Not	Yes	Yes	Not	Yes	Not	Not	Always		Sometimes	Sometimes	Sometimes	Always	Always	Yes	27 Sep 20	27.5312	7-11a	11	Yes	Yes	Yes
180	2	Quillabamba	7	Fem	45	5	Not	Yes	Not	Not	Not	Not	98	1.6	Not	Not	Yes	Not	Not	Not	Not	Not	Yes	Not	Not	Always	Always	Never	Never	Never	Always	Always	Not	14 Sep 20	38.2812	7-11a	11	Not	Yes	Not
392	1	Cusco	sector 4	Fem	42	2	Not	Not	Not	Not	Not	Not	75	1.6	Not	Not	Not	Not	Not	Not	Not	Not	Not	Not	Not	Sometimes	Always	Always	Frequently	Sometimes	Frequently	Sometimes	Not	27 Sep 20	29.2969	<7a	13	Not	Not	Not
237	7	Periphery of Cusco	5543	Masc	33	8	Not	Not	Not	Not	Not	Not	68	1.69	Not	Not	Not	Not	Not	Not	Not	Not	Not	Not	Not	Always	Always	Frequently	Sometimes	Sometimes	Always	Always	Not	19 Sep 20	23.8087	12a+	17	Not	Yes	Yes
1020- 438	1	Quillabamba	N10	Fem	46	7	Not	Not	Not	Not	Not	Not			Not	Not	Not	Not	Not	Yes	Not	Not	Yes	Yes	Not	Always	Always	Always	Always	Always	Always	Always	Not	14 Sep 20		12a+	12	Not	Yes	Not
237	3	Periphery of Cusco	5543	Fem	53	8	Not	Not	Not	Not	Not	Not	54	1.5	Not	Yes	Yes	Not	Not	Not	Not	Not	Yes	Yes	Not	Always	Always	Never	Always	Sometimes	Always	Always	Not	19 Sep 20	24	12a+	17	Not	Yes	Yes
1021 - 435	2	Quillabamba	N7	Masc	59	5	Not	Not	Not	Not	Not	Not	60	1.5	Not	Not	Not	Not	Not	Not	Not	Not	Not	Not	Not	Frequently	Frequently	Never	Never	Never	Frequently	Always	Not	14 Sep 20	26.6667		12	Not	Not	Not
237	2	Periphery of Cusco	5543	Masc	26	8	Not	Not	Not	Not	Not	Not	84	1.74	Yes	Not	Yes	Not	Yes	Not	Yes	Not	Yes	Yes	Not	Always	Always	Frequently	Frequently	Never	Always	Always	Not	19 Sep 20	27.7447	12a+	17	Not	Yes	Yes
266	3	Periphery of Cusco	77052	Fem	33	3	Not	Not	Not	Not	Not	Not	57	1.53	Yes	Yes	Yes	Not	Not	Not	Not	Yes	Yes	Not	Not	Always	Always	Sometimes	Sometimes	Sometimes	Always	Always	Yes	19 Sep 20	24.3496	12a+	12	Not	Not	Not
325	3	Cusco	89	Masc	37	8	Not	Not	Not	Not	Not	Not	54	1.6	Not	Yes	Yes	Not	Not	Not	Not	Not	Yes	Yes	Not	Always	Always	Always	Frequently	Always	Always	Always	Yes	20 Sep 20	21.0938	12a+	13	Not	Not	Not
293	6	Periphery of Cusco	293-1.10	Masc	49	10	Not	Not	Not	Not	Not	Not		1.66	Yes	Yes	Yes	Not	Not	Not	Yes	Yes	Yes	Yes	Not	Always	Always	Sometimes	Frequently	Always	Always	Always	Not	20 Sep 20		12a+	13	Not	Not	Not
1021 - 435	1	Quillabamba	N7	Masc	45	5	Not	Not	Not	Not	Not	Not	86	1.6	Not	Not	Not	Not	Not	Not	Not	Not	Not	Not	Not	Frequently	Frequently	Never	Never	Never	Frequently	Always	Yes	14 Sep 20	33.5938	12a+	12	Not	Not	Not
828	1	Cusco	45kg11A	Fem	22	1	Not	Not	Not	Not	Not	Not	52	1.52	Not	Not	Not	Not	Not	Not	Not	Not	Not	Not	Not	Always	Always	Always	Always	Never	Frequently	Always	Yes	27 Sep 20	22.5069	12a+	11	Yes	Yes	Yes
1020- 438	4	Quillabamba	N10	Masc	24	7	Not	Not	Not	Not	Not	Not	68	1.67	Not	Not	Not	Not	Not	Not	Not	Not	Not	Not	Not	Frequently	Frequently	Never	Never	Never	Frequently	Frequently	Not	14 Sep 20	24.3824	7-11a	12	Not	Yes	Not
237	6	Periphery of Cusco	5543	Masc	19	8	Not	Not	Not	Not	Not	Not	75	1.73	Not	Not	Not	Not	Not	Not	Not	Not	Not	Not	Not	Frequently	Always	Never	Frequently	Never	Always	Always	Not	19 Sep 20	25.0593	7-11a	17	Not	Yes	Yes
1021 - 435	5	Quillabamba	N7	Masc	77	5	Not	Not	Not	Not	Not	Not	78	1.61	Not	Not	Not	Not	Not	Not	Not	Not	Not	Not	Not	Frequently	Frequently	Never	Never	Never	Frequently	Always	Not	14 Sep 20	30.0914	7-11a	12	Not	Not	Not
40	1	Cusco	3054A	Masc	42	11	Not	Not	Not	Not	Not	Not	82	1.78	Not	Yes	Not	Not	Not	Not	Not	Not	Not	Not	Not	Always	Always	Always	Always	Sometimes	Always	Always	Not	14 Sep 20	25.8806	12a+	14	Not	Not	Yes
534	3	Cusco	45ERI4	Masc	28	4	Yes	Not	Not	Not	Not	Not	75	1.75	Not	Not	Yes	Not	Not	Yes	Not	Not	Yes	Yes	Not	Always	Always	Always	Always	Never	Always	Always	Not	20 Sep 20	24.4898	12a+	11	Not	Not	Yes
410	2	Periphery of Cusco	50DR31	Fem	30	8	Not	Not	Not	Not	Not	Not	65	1.58	Not	Not	Yes	Not	Not	Not	Not	Not	Not	Not	Not	Always	Always	Sometimes	Sometimes	Never	Always	Always	Not	27 Sep 20	26.0375	12a+	12	Yes	Yes	Yes
354	4	Periphery of Cusco	29011	Fem	26	9	Not	Not	Not	Not	Not	Not	70	1.3	Yes	Not	Not	Not	Yes	Not	Not	Not	Yes	Yes	Not	Frequently	Always	Frequently	Always	Sometimes	Always	Always	Not	26 Sep 20	41.4201	12a+	12	Not	Yes	Yes
129	7	Periphery of Cusco	4452B	Masc	24	7	Not	Not	Not	Not	Not	Not	64	1.68	Not	Not	Not	Not	Not	Not	Not	Not	Not	Not	Not	Frequently	Always	Sometimes	Sometimes	Never	Always	Frequently	Not	14 Sep 20	22.6757	7-11a	13	Not	Not	Not
180	5	Quillabamba	7	Masc	70	5	Not	Not	Not	Not	Not	Not	78	1.8	Not	Not	Not	Not	Not	Not	Not	Not	Yes	Not	Not	Always	Frequently	Always	Always	Never	Always	Always	Not	14 Sep 20	24.0741	12a+	11	Not	Yes	Not
501	6	Cusco	2115	Masc	80	8	Not	Not	Not	Not	Not	Not	55	1.5	Not	Not	Not	Not	Not	Not	Not	Not	Not	Not	Not	Always	Always	Never	Always	Never	Always	Always	Not	20 Sep 20	24.4444	7-11a	15	Not	Not	Not
364	3	Cusco	452B23	Masc	37	6	Not	Not	Not	Not	Not	Not	76	1.65	Yes	Not	Not	Not	Yes	Yes	Not	Not	Yes	Yes	Not	Always	Always	Never	Sometimes	Never	Always	Always	Yes	26 Sep 20	27.9155	12a+	11	Yes	Yes	Yes
410	7	Periphery of Cusco	50DR31	Fem	45	8	Not	Not	Not	Not	Not	Not	53	1.5	Not	Not	Not	Not	Not	Not	Not	Not	Not	Not	Not	Always	Always	Never	Sometimes	Never	Always	Always	Yes	27 Sep 20	23.5556	12a+	12	Yes	Yes	Yes
28	7	Periphery of Cusco	4412	Masc	44	8	Not	Not	Not	Not	Not	Not	82	1.7	Not	Not	Not	Not	Not	Not	Not	Not	Yes	Not	Not	Always	Always	Never	Always	Never	Always	Always	Not	14 Sep 20	28.3737	12a+	13	Not	Not	Not
41	2	Cusco	3054B	Fem	64	2	Not	Not	Not	Not	Not	Not	65	1.62	Not	Yes	Not	Not	Not	Yes	Not	Yes	Yes	Not	Not	Always	Always	Never	Sometimes	Never	Always	Always	Yes	14 Sep 20	24.7676	12a+	14	Not	Not	Yes
107	2	Periphery of Cusco	3821	Fem	70	10	Not	Not	Not	Not	Not	Not	58	1.45	Not	Not	Not	Not	Not	Not	Not	Not	Not	Not	Not	Always	Always	Always	Always	Never	Always	Always	Not	14 Sep 20	27.5862	12a+	14	Not	Yes	Yes
305	2	Cusco	45ER24	Masc	20	3	Not	Not	Not	Not	Not	Not	60	1.65	Not	Not	Not	Not	Not	Not	Not	Not	Not	Not	Not	Always	Always	Never	Frequently	Sometimes	Always	Always	Not	20 Sep 20	22.0386	12a+	12	Not	Not	Not
293	3	Periphery of Cusco	293-1.10	Masc	47	10	Not	Not	Not	Not	Not	Not	89	1.73	Not	Yes	Yes	Not	Not	Not	Not	Not	Not	Not	Not	Always	Always	Always	Always	Always	Always	Always	Not	20 Sep 20	29.737	12a+	13	Not	Not	Not
129	2	Periphery of Cusco	4452B	Fem	40	7	Not	Not	Not	Not	Not	Not	57	1.4	Not	Not	Not	Not	Not	Not	Not	Not	Not	Not	Not	Always	Always	Never	Sometimes	Never	Always	Always	Yes	14 Sep 20	29.0816	<7a	13	Not	Not	Not
24	6	Periphery of Cusco	493A3	Masc	40	6	Not	Not	Not	Not	Not	Not	70	1.6	Not	Not	Yes	Not	Not	Not	Not	Not	Not	Not	Not	Frequently	Always		Sometimes	Sometimes	Always	Always	Not	14 Sep 20	27.3438	12a+	16	Not	Not	Yes
168	2	Quillabamba	19	Fem	18	3	Not	Not	Not	Not	Not	Not	68	1.53	Not	Not	Not	Not	Not	Not	Not	Not	Not	Not	Not	Always	Always	Never	Sometimes	Never	Always	Always	Yes	14 Sep 20	29.0487	<7a	16	Not	Yes	Not
107	6	Periphery of Cusco	3821	Fem	49	10	Not	Not	Not	Not	Not	Not	56	1.6	Yes	Yes	Yes	Not	Yes	Yes	Not	Not	Yes	Yes	Not	Always	Always		Always			Always	Yes	14 Sep 20	21.875		14	Not	Yes	Yes
293	9	Periphery of Cusco	293-1.10	Masc		10	Not	Not	Not	Not	Not	Not	86	1.6	Not	Not	Not	Not	Not	Not	Not	Not	Not	Not	Not	Always	Always	Never		Never	Always	Always	Not	20 Sep 20	33.5938	7-11a	13	Not	Not	Not
501	1	Cusco	2115	Fem	68	8	Not	Yes	Not	Not		Not	63	1.57	Not	Not	Not	Not	Not	Not	Not	Not	Not	Not	Not	Always	Always	Never	Always	Never	Always	Frequently	Not	20 Sep 20	25.5588	7-11a	15	Not	Not	Not
237	4	Periphery of Cusco	5543	Masc	56	8	Not	Not	Not	Not	Not	Not	66	1.77	Not	Not	Not	Not	Not	Not	Not	Not	Not	Not	Not	Always	Always		Frequently	Never	Frequently	Frequently	Not	19 Sep 20	21.0667	12a+	17	Not	Yes	Yes
328	2	Cusco	2114	Fem	40	4	Not	Not	Not	Not	Not	Not	58	1.55	Not	Not	Yes	Not	Not	Not	Not	Yes	Not	Not	Not	Always	Always	Always	Always	Always	Always	Always	Yes	20 Sep 20	24.1415	12a+	15	Not	Yes	Yes
3	6	Periphery of Cusco	22213	Masc	32	9	Not	Not	Not	Not	Not	Not	82	1.56	Yes	Yes	Not	Not	Yes	Not	Not	Yes	Yes	Not	Not	Always	Always	Always	Frequently	Sometimes	Always	Frequently	Yes	14 Sep 20	33.6949	12a+	20	Not	Yes	Not
3	7	Periphery of Cusco	22213	Fem	26	9	Not	Not	Not	Not	Not	Not	56	1.56	Yes	Yes	Yes	Not	Not	Not	Yes	Not	Yes	Not	Yes	Frequently	Always	Never	Sometimes	Sometimes	Always	Frequently	Yes	14 Sep 20	23.0112	7-11a	20	Not	Yes	Not
704	3	Cusco	45ME16	Fem	49	6	Not	Not	Not	Not	Not	Not	54	1.6	Not	Not	Not	Not	Not	Not	Not	Not	Not	Not	Not	Frequently	Frequently	Never	Sometimes	Never	Frequently	Frequently	Not	27 Sep 20	21.0938	12a+	11	Not	Not	Not
1021 - 435	3	Quillabamba	N7	Fem	48	5	Not	Not	Not	Not	Not	Not	81	1.5	Not	Not	Not	Yes	Not	Not	Not	Not	Yes	Not	Not	Frequently	Frequently	Never	Sometimes	Never	Frequently	Always	Yes	14 Sep 20	36	7-11a	12	Not	Not	Not
356	3	Cusco	212B01	Fem	52	7	Yes	Not	Not	Not	Not	Not			Not	Not	Yes	Not	Not	Not	Not	Not	Not	Not	Yes	Always	Always	Frequently	Frequently	Never	Always	Always	Yes	26 Sep 20		7-11a	13	Not	Yes	Yes
325	8	Cusco	89	Fem	55	8	Not	Yes	Not	Not	Not	Not			Not	Not	Yes	Not	Not	Not	Not	Not	Not	Yes	Not	Sometimes	Frequently		Sometimes	Frequently	Frequently	Always	Yes	20 Sep 20			13	Not	Not	Not
40	10	Cusco	3054A	Fem	42	11	Not	Not	Not	Not	Not	Not	71	1.64	Not	Not	Not	Not	Not	Not	Yes	Not	Not	Yes	Not	Always	Always	Always	Always	Never	Always	Always	Not	14 Sep 20	26.398	12a+	14	Not	Not	Yes
354	8	Periphery of Cusco	29011	Fem	22	9	Not	Not	Not	Not	Not	Not	67	1.58	Not	Yes	Yes	Not	Not	Not	Yes	Not	Yes	Not	Not	Always	Always	Never	Always	Never	Always	Always	Not	26 Sep 20	26.8387	12a+	12	Not	Yes	Yes
354	1	Periphery of Cusco	29011	Fem	42	9	Not	Not	Not	Not	Not	Not	62	1.58	Yes	Yes	Yes	Yes	Yes	Yes	Yes	Yes	Yes	Yes	Not	Always	Always	Never	Always	Never	Always	Always	Yes	26 Sep 20	24.8358	12a+	12	Not	Yes	Yes
293	2	Periphery of Cusco	293-1.10	Fem	73	10	Yes	Not	Not	Not	Not	Not	90	1.56	Not	Not	Not	Not	Not	Not	Not	Not	Not	Not	Not	Always	Always	Never	Always	Sometimes	Always	Always	Not	20 Sep 20	36.9823	7-11a	13	Not	Not	Not
327	1	Cusco	89-FAMEXT	Fem	27	3	Not	Not	Not	Not	Not	Not	68	1.5	Not	Not	Yes	Yes	Not	Not	Yes	Not	Yes	Not	Not	Always	Always	Never	Sometimes	Never	Always	Always	Not	20 Sep 20	30.2222	7-11a	13	Not	Not	Yes
129	4	Periphery of Cusco	4452B	Fem	31	7	Not	Not	Not	Not	Not	Not	67	1.56	Yes	Not	Not	Not	Not	Not	Not	Not	Not	Not	Not	Always	Always	Never	Sometimes	Never	Always	Frequently	Yes	14 Sep 20	27.5312	7-11a	13	Not	Not	Not
327	3	Cusco	89-FAMEXT	Fem	23	3	Not	Not	Not	Not	Not	Not	62	1.64	Yes	Yes	Yes	Yes	Not	Yes	Not	Yes	Yes	Yes	Not	Always	Always	Sometimes	Always	Frequently	Always	Always	Yes	20 Sep 20	23.0517	12a+	13	Not	Not	Yes
238	1	Periphery of Cusco	5543	Masc	85	2	Not	Not	Not	Not	Not	Not	70	1.6	Yes	Not	Not	Not	Not	Yes	Not	Not	Yes	Not	Not	Always	Always	Frequently	Always	Sometimes	Frequently	Always	Not	19 Sep 20	27.3438	7-11a	16	Not	Yes	Yes
28	8	Periphery of Cusco	4412	Fem	38	8	Not	Not	Not	Not	Not	Not	60	1.56	Yes	Not	Not	Not	Not	Not	Not	Not	Not	Not	Not	Always	Always	Never	Always	Never	Always	Always	Not	14 Sep 20	24.6548	7-11a	13	Not	Not	Not
726	5	Cusco	45DR22	Fem	54	5	Not	Not	Not	Not	Not	Not	80	1.65	Yes	Yes	Not	Not	Not	Not	Not	Not	Yes	Yes	Not	Always	Always	Sometimes	Sometimes	Never	Always	Always	Not	27 Sep 20	29.3848	7-11a	12	Not	Yes	Yes
3	8	Periphery of Cusco	22213	Fem	40	9	Not	Not	Not	Not	Not	Not			Not	Not	Not	Not	Not	Not	Not	Not	Not	Not	Not	Frequently	Always	Never	Sometimes	Never	Frequently	Frequently	Yes	14 Sep 20		7-11a	20	Not	Yes	Not
107	5	Periphery of Cusco	3821	Masc	73	10	Not	Not	Not	Not	Not	Not	79	1.2	Not	Yes	Yes	Not	Not	Not	Not	Not	Yes	Not	Not	Always	Always	Always	Always		Always	Always	Not	14 Sep 20	54.8611	12a+	14	Not	Yes	Yes
107	4	Periphery of Cusco	3821	Fem	23	10	Not	Not	Not	Not	Not	Not	52		Not	Yes	Not	Not	Not	Not	Not	Not	Not	Not	Not	Frequently	Frequently		Frequently		Frequently	Always	Not	14 Sep 20		12a+	14	Not	Yes	Yes
501	5	Cusco	2115	Fem	31	8	Not	Not	Not	Not	Not	Not	53	1.53	Not	Not	Not	Not	Not	Yes	Not	Not	Not	Not	Not	Always	Always		Frequently	Never	Always	Always	Yes	20 Sep 20	22.6409	12a+	15	Not	Not	Not
355	4	Periphery of Cusco	29031	Fem	38	4	Not	Not	Not	Not	Not	Not	60	1.58	Not	Not	Not	Not	Not	Not	Not	Not	Not	Not	Not	Always	Always	Frequently	Frequently	Never	Always	Always	Not	26 Sep 20	24.0346	12a+	12	Not	Not	Not
501	7	Cusco	2115	Fem	80	8	Not	Not	Not	Not	Not	Not	52	1.45	Yes	Not	Yes	Not	Yes	Yes	Not	Not	Yes	Yes	Not	Frequently	Always	Frequently	Frequently	Never	Always	Always	Not	20 Sep 20	24.7325	12a+	15	Not	Not	Not
325	4	Cusco	89	Fem	79	8	Yes	Not	Not	Not	Yes	Not	47	1.5	Yes	Yes	Yes	Not	Yes	Yes	Not	Not	Yes	Yes	Not	Sometimes	Sometimes	Never	Sometimes	Never	Sometimes	Frequently	Yes	20 Sep 20	20.8889		13	Not	Not	Not
726	1	Cusco	45DR22	Masc	35	5	Not	Not	Not	Not	Not	Not	66	1.68	Not	Yes	Not	Not	Not	Not	Not	Not	Yes	Not	Not	Always	Always	Frequently	Frequently	Sometimes	Always	Always	Not	27 Sep 20	23.3844	7-11a	12	Not	Yes	Yes
393	1	Cusco	89	Fem	23	3	Not	Not	Not	Not	Not	Not	47	1.53	Not	Yes	Not	Not	Not	Not	Not	Yes	Yes	Not	Not	Frequently	Always	Sometimes	Sometimes	Never	Frequently	Frequently	Not	27 Sep 20	20.0778	12a+	11	Not	Not	Not
24	5	Periphery of Cusco	493A3	Fem	37	6	Not	Not	Not	Not	Not	Not	67	1.62	Not	Not	Not	Not	Not	Not	Not	Not	Yes	Not	Not	Always	Always		Always	Sometimes	Always	Always	Yes	14 Sep 20	25.5296	12a+	16	Not	Not	Yes
364	2	Cusco	452B23	Masc	75	6	Not	Not	Not	Not	Not	Not	83	1.65	Yes	Not	Not	Not	Not	Not	Not	Not	Not	Not	Not	Always	Always	Never	Frequently	Never	Always	Always	Yes	26 Sep 20	30.4867	7-11a	11	Yes	Yes	Yes
24	3	Periphery of Cusco	493A3	Fem	49	6	Not	Not	Not	Not	Not	Not	68	1.5	Not	Not	Not	Not	Not	Not	Not	Yes	Yes	Not	Not	Frequently	Always	Never	Never	Never	Always	Always	Not	14 Sep 20	30.2222	12a+	16	Not	Not	Yes
501	2	Cusco	2115	Fem	30	8	Not	Not	Not	Not	Not	Not	50	1.6	Not	Not	Not	Not	Not	Not	Not	Not	Not	Not	Not	Frequently	Always	Never	Always	Never	Always	Always	Yes	20 Sep 20	19.5312	12a+	15	Not	Not	Not
1020- 438	7	Quillabamba	N10	Fem	46	7	Not	Not	Not	Not	Not	Not	76	1.5	Not	Not	Not	Not	Not	Not	Not	Not	Not	Not	Not	Frequently	Frequently	Never	Never	Never	Frequently	Always	Not	14 Sep 20	33.7778	12a+	12	Not	Yes	Not
40	7	Cusco	3054A	Masc	60	11	Not	Not	Not	Not	Not	Not	83	1.63	Not	Not	Not	Not	Not	Not	Not	Not	Not	Not	Not	Always	Always	Frequently	Always	Never	Always	Always	Not	14 Sep 20	31.2394	12a+	14	Not	Not	Yes
40	5	Cusco	3054A	Fem	58	11	Not	Not	Not	Not	Not	Not	74	1.56	Not	Not	Not	Not	Not	Not	Not	Yes	Not	Not	Not	Always	Always	Always	Always	Never	Always	Always	Not	14 Sep 20	30.4076	12a+	14	Not	Not	Yes
476	7	Quillabamba	1026B	Masc	27	8	Not	Not	Not	Not	Not	Not	61	1.65	Not	Not	Not	Not	Not	Not	Not	Not	Yes	Yes	Not	Always	Always	Never	Never	Never	Always	Always	Not	19 Sep 20	22.4059	12a+		Not	Not	Not
476	4	Quillabamba	1026B	Fem	47	8	Not	Not	Not	Not	Not	Not	75	1.65	Not	Not	Yes	Not	Not	Not	Not	Not	Not	Not	Not	Always	Always	Never	Never	Never	Always	Always	Not	19 Sep 20	27.5482	12a+		Not	Not	Not
CHS40	1	Quillabamba	32	Masc		3	Not	Yes	Not	Not	Not	Not			Not	Not	Not	Not	Not	Not	Not	Not	Not	Not	Not	Always	Always	Never	Never	Never	Always	Always	Not	20 Sep 20
1005-423	3	Periphery of Cusco	1741	Masc	53	3	Not	Not	Not	Not	Not	Not	70	1.65	Not	Not	Not	Not	Not	Not	Not	Not	Not	Not	Not	Always	Always	Always	Never	Never	Always	Frequently	Not	19 Sep 20	25.7117	12a+		Not	Yes	Yes
469	4	Quillabamba	1019	Fem	73	8	Yes	Not	Not	Not	Not	Not			Not	Not	Not	Not	Not	Not	Not	Not	Yes	Not	Not	Always	Always	Never	Never	Never	Always	Always	Yes	19 Sep 20		<7a		Not	Not	Not
1005-423	1	Periphery of Cusco	1741	Masc	75	3	Not	Not	Not	Not	Not	Not	60	1.6	Not	Not	Not	Not	Not	Not	Not	Not	Not	Not	Not	Always	Always	Always	Sometimes	Never	Always	Always	Not	19 Sep 20	23.4375	7-11a		Not	Yes	Yes
321	4	Cusco	89	Masc	33	4	Not	Not	Not	Not	Not	Not	60		Not	Not	Not	Not	Not	Not	Not	Not	Not	Not	Not	Always	Always	Never	Always	Always	Always	Sometimes	Not	20 Sep 20		12a+		Not	Not	Not
476	8	Quillabamba	1026B	Masc	31	8	Not	Not	Not	Not	Not	Not	70	1.63	Not	Not	Not	Not	Not	Not	Not	Not	Not	Not	Not	Always	Always	Never	Never	Never	Always	Always	Not	19 Sep 20	26.3465	12a+		Not	Not	Not
199	2	Quillabamba	Q199	Fem	23	5	Not	Not	Not	Not	Not	Not	57	1.58	Not	Not	Not	Not	Not	Not	Not	Not	Not	Not	Not	Always	Always	Never	Sometimes	Sometimes	Always	Always	Not	14 Sep 20	22.8329	12a+
321	3	Cusco	89	Fem	20	4	Not	Not	Not	Not	Not	Not	58	1.5	Not	Not	Not	Not	Not	Not	Not	Not	Not	Not	Not	Always	Always	Never	Always	Always	Always	Sometimes	Not	20 Sep 20	25.7778	12a+		Not	Not	Not
476	5	Quillabamba	1026B	Fem	24	8	Not	Not	Not	Not	Not	Not	60	1.6	Not	Not	Yes	Not	Not	Not	Not	Not	Not	Not	Not	Always	Always	Never	Never	Never	Always	Always	Not	19 Sep 20	23.4375	12a+		Not	Not	Not
903	1	Quillabamba	12	Fem	62	1	Not	Not	Not	Not	Not	Not	65	1.42	Not	Not	Not	Not	Not	Not	Not	Not	Not	Not	Not	Always	Always	Never	Never	Never	Always	Always	Yes	20 Sep 20	32.2357	7-11a
330	2	Periphery of Cusco	2501	Fem	22	5	Not	Not	Not	Not	Not	Not	80	1.54	Not	Not	Not	Not	Not	Not	Not	Yes	Not	Not	Not	Frequently	Frequently	Never	Frequently	Sometimes	Always	Frequently	Yes	25 Sep 20	33.7325	12a+		Not	Yes	Yes
196	4	Quillabamba	Q196	Fem	22	7	Not	Not	Not	Not	Not	Not	57	1.59	Not	Not	Not	Not	Not	Not	Not	Not	Not	Yes	Not	Always	Always	Never	Sometimes	Never	Always	Always	Not	14 Sep 20	22.5466	12a+				Not
711	2	Periphery of Cusco	45ME04	Masc	38	2	Not	Not	Not	Not	Not	Not	80	1.77	Not	Not	Not	Not	Not	Not	Not	Not	Not	Not	Not	Always	Always	Sometimes	Sometimes	Sometimes	Always	Always	Not	27 Sep 20	25.5355	12a+		Not	Not	Not
222	1	Periphery of Cusco	-	Fem	63	1	Not	Not	Not	Not	Not	Not	65	1.5	Not	Not	Not	Not	Not	Not	Not	Not	Not	Not	Not	Always	Always				Always	Always	Not	18 Sep 20	28.8889	7-11a		Not	Not	Not
469	5	Quillabamba	1019	Masc	18	8	Not	Not	Not	Not	Not	Not			Not	Not	Not	Not	Not	Not	Not	Not	Not	Not	Not	Always	Always	Always	Sometimes	Sometimes	Never	Always	Not	19 Sep 20		<7a		Not	Not	Not
399	3	Periphery of Cusco	50ME02	Masc	41	3	Not	Not	Not	Not	Not	Not	95	1.72	Yes	Not	Not	Not	Yes	Yes	Not	Yes	Yes	Yes	Not	Always	Always	Never	Frequently	Never	Always	Always	Not	27 Sep 20	32.112	12a+		Not	Yes	Yes
469	3	Quillabamba	1019	Masc	35	8	Not	Not	Not	Not	Not	Not	51	1.5	Not	Not	Not	Not	Not	Not	Not	Not	Not	Not	Not	Always	Always	Never	Never	Never	Always	Always	Not	19 Sep 20	22.6667	7-11a		Not	Not	Not
469	1	Quillabamba	1019	Masc	34	8	Not	Not	Not	Not	Not	Not	67	1.65	Not	Not	Not	Not	Not	Not	Not	Not	Not	Yes	Not	Frequently	Frequently	Sometimes	Never	Never	Frequently	Frequently	Not	19 Sep 20	24.6097	7-11a		Not	Not	Not
476	2	Quillabamba	1026B	Masc	33	8	Not	Not	Not	Not	Not	Not	95	1.9	Not	Not	Yes	Not	Not	Not	Not	Not	Not	Not	Not	Frequently	Always	Frequently	Never	Never	Always	Frequently	Not	19 Sep 20	26.3158	12a+		Not	Not	Not
942	3	Quillabamba	52	Masc	19	3	Not	Not	Not	Not	Not	Not	59	1.6	Not	Not	Not	Not	Not	Yes	Yes	Not	Not	Not	Not	Always	Always	Never	Never	Never	Always	Always	Yes	20 Sep 20	23.0469	12a+
565	5	Periphery of Cusco	5341	Fem	34	8	Not	Not	Not	Not	Not	Not	70	1.68	Not	Not	Yes	Not	Not	Not	Not	Not	Not	Not	Not	Always	Frequently	Never	Frequently	Never	Always	Always	Not	20 Sep 20	24.8016	12a+		Not	Yes	Yes
199	3	Quillabamba	Q199	Masc	41	5	Not	Not	Not	Not	Not	Not	83	1.76	Not	Not	Not	Not	Yes	Yes	Yes	Yes	Not	Not	Not	Always	Always	Always	Never	Sometimes	Always	Always	Yes	14 Sep 20	26.7949	12a+
202	2	Quillabamba	Q202	Fem	40	3	Not	Not	Not	Not	Not	Not	56	1.57	Not	Not	Not	Not	Not	Not	Not	Not	Yes	Yes	Not	Always	Always	Never	Never	Never	Always	Always	Not	14 Sep 20	22.719	12a+
323	3	Cusco	89	Fem	52	3	Not	Not	Not	Not	Not	Not	54	1.55	Yes	Yes	Not	Not	Yes	Yes	Not	Not	Yes	Not	Not	Frequently	Frequently		Frequently		Always	Always	Not	20 Sep 20	22.4766	<7a
924	1	Quillabamba	33	Fem	49	3	Not	Not	Not	Not	Not	Not			Not	Not	Not	Not	Not	Not	Not	Not	Not	Not	Not	Always	Always	Never	Never	Never	Always	Always	Not	20 Sep 20
CHS40	3	Quillabamba	32	Fem		3	Not	Not	Not	Not	Not	Not			Not	Not	Not	Not	Not	Not	Not	Not	Yes	Not	Not	Always	Always	Never	Never	Never	Always	Always	Not	20 Sep 20		12a+
CHS40	2	Quillabamba	32	Masc		3	Not	Not	Not	Not	Not	Not			Not	Not	Not	Not	Not	Not	Not	Not	Not	Not	Not	Always	Always	Never	Never	Never	Always	Always	Not	20 Sep 20		7-11a
460	1	Quillabamba	1010	Masc	35	2	Not	Not	Not	Not	Not	Not	78	1.74	Not	Not	Not	Not	Not	Not	Not	Not	Not	Not	Not	Always	Always	Never	Never	Never	Always	Always	Not	19 Sep 20	25.763	12a+		Not	Not	Not
196	5	Quillabamba	Q196	Masc	24	7	Not	Not	Not	Not	Not	Not	50	1.59	Not	Not	Not	Not	Not	Not	Not	Not	Not	Not	Not	Always	Sometimes	Frequently		Never	Frequently	Always	Not	14 Sep 20	19.7777	12a+				Not
202	1	Quillabamba	Q202	Fem	21	3	Not	Not	Not	Not	Not	Not	65	1.52	Not	Yes	Not	Not	Not	Yes	Not	Not	Not	Not	Not	Always	Always	Never	Never	Never	Always	Always	Not	14 Sep 20	28.1337	12a+
287	1	Periphery of Cusco	62031	Masc	37	1	Not	Not	Not	Not	Not	Not	70	1.6	Not	Not	Not	Not	Not	Not	Not	Not	Not	Not	Not	Always	Always	Never	Sometimes	Never	Always	Always	Yes	19 Sep 20	27.3438	12a+	0	Not	Not	Not
937	1	Quillabamba	46	Fem	54	1	Not	Not	Not	Not		Yes			Not	Not	Not	Not	Not	Not	Not	Not	Not	Not	Not	Always	Always	Never	Never	Never	Always	Always	Yes	20 Sep 20
10	2	Periphery of Cusco	31	Masc	44	4	Not	Not	Not	Not	Not	Not	86	1.72	Not	Yes	Not	Not	Not	Not	Not	Not	Yes	Not	Not	Always	Always	Always	Sometimes	Never	Always	Always	Not	14 Sep 20	29.0698
196	3	Quillabamba	Q196	Fem	54	7	Not	Yes	Not	Not	Not	Not	50	1.5	Not	Not	Not	Not	Not	Not	Not	Not	Not	Not	Not	Always	Always	Sometimes	Sometimes	Never	Frequently	Always	Not	14 Sep 20	22.2222	12a+				Not
196	7	Quillabamba	Q196	Fem	30	7	Not	Not	Not	Not	Not	Not	58	1.5	Not	Not	Not	Not	Not	Not	Not	Not	Not	Not	Not	Always	Always	Frequently	Sometimes		Sometimes	Always	Not	14 Sep 20	25.7778	12a+				Not
196	2	Quillabamba	Q196	Masc	23	7	Not	Not	Not	Not	Not	Not	89	1.78	Not	Not	Not	Not	Not	Not	Not	Not	Not	Not	Not	Always	Always	Frequently	Never	Never	Always	Always	Not	14 Sep 20	28.0899	12a+				Not
565	8	Periphery of Cusco	5341	Fem	32	8	Not	Not	Not	Not	Not	Not	58	1.63	Not	Yes	Yes	Not	Not	Not	Not	Yes	Yes	Not	Not	Always	Always	Never	Always	Never	Always	Always	Not	20 Sep 20	21.83	12a+		Not	Yes	Yes
196	6	Quillabamba	Q196	Fem	27	7	Not	Not	Not	Not	Not	Not	61	1.7	Not	Not	Not	Not	Not	Not	Not	Not	Not	Not	Not	Always	Always	Never	Never	Never	Always	Always	Not	14 Sep 20	21.1073	12a+				Not
565	4	Periphery of Cusco	5341	Masc	23	8	Not	Not	Not	Not	Not	Not	86	1.75	Yes	Yes	Yes	Yes	Yes	Yes	Yes	Yes	Yes	Yes	Yes	Always	Frequently	Never	Frequently	Never	Always	Always	Yes	20 Sep 20	28.0816	12a+		Not	Yes	Yes
469	6	Quillabamba	1019	Masc	19	8	Not	Not	Not	Not	Not	Not	63	1.59	Not	Yes	Not	Not	Not	Not	Not	Not	Not	Not	Not	Always	Always	Never	Never	Never	Always	Always	Not	19 Sep 20	24.9199	12a+		Not	Not	Not
924	2	Quillabamba	33	Masc	51	3	Not	Yes	Not	Not	Not	Not			Not	Not	Not	Not	Not	Not	Not	Not	Not	Not	Not	Always	Always	Never	Never	Never	Always	Always	Not	20 Sep 20
565	7	Periphery of Cusco	5341	Masc	29	8	Not	Not	Not	Not	Not	Not	63	1.77	Yes	Yes	Yes	Not	Yes	Yes	Not	Yes	Yes	Yes	Yes	Always	Always	Never	Sometimes	Never	Always	Always	Yes	20 Sep 20	20.1092	12a+		Not	Yes	Yes
224	1	Periphery of Cusco	224-N-1.10	Masc	27	2	Not	Not	Not	Not	Not	Not	52	1.55	Not	Not	Not	Not	Not	Not	Not	Not	Not	Not	Not	Always	Always				Always	Always	Not	18 Sep 20	21.6441	12a+		Not	Not	Not
310	1	Cusco	45ER21	Fem	24	1	Not	Not	Not	Not	Not	Not	69	1.65	Not	Not	Not	Not	Not	Not	Not	Not	Yes	Not	Not	Always	Always	Never	Frequently	Never	Always	Always	Not	20 Sep 20	25.3443	12a+		Not	Not	Not
399	1	Periphery of Cusco	50ME02	Fem	23	3	Not	Not	Not	Not	Not	Not	78	1.56	Yes	Yes	Yes	Not	Not	Yes	Yes	Not	Yes	Yes	Not	Always	Always	Never	Sometimes	Never	Always	Always	Yes	27 Sep 20	32.0513	12a+		Not	Yes	Yes
227	1	Periphery of Cusco	-	Masc	72	1	Not	Not	Not	Not	Not	Not			Not	Not	Not	Not	Not	Not	Not	Not	Not	Not	Not	Always	Always		Sometimes		Always	Always	Yes	18 Sep 20		12a+
542	1	Cusco	45ER7	Masc	54	1	Not	Not	Not	Not	Not	Not	92	1.72	Not	Not	Not	Not	Not	Not	Not	Not	Not	Not	Not	Always	Always	Sometimes	Sometimes	Never	Always	Always	Yes	20 Sep 20	31.0979	7-11a	0	Not	Not	Yes
469	7	Quillabamba	1019	Fem	55	8	Not	Not	Not	Not	Not	Not	63	1.61	Not	Not	Not	Not	Yes	Yes	Yes	Not	Yes	Yes	Not	Always	Always	Always	Always		Never	Always	Not	19 Sep 20	24.3046	7-11a		Not	Not	Not
477	6	Quillabamba	1026	Masc	29	6	Not	Not	Not	Not	Not	Not	72	1.65	Yes	Not	Not	Not	Not	Not	Not	Not	Not	Not	Not	Always	Always	Never	Never	Never	Always	Always	Yes	19 Sep 20	26.4463	12a+		Not	Not	Not
942	2	Quillabamba	52	Fem	19	3	Not	Not	Not	Not	Not	Not	46	1.54	Not	Not	Not	Not	Not	Not	Not	Not	Yes	Not	Not	Always	Always	Never	Never	Never	Always	Always	Not	20 Sep 20	19.3962	12a+
330	4	Periphery of Cusco	2501	Masc	40	5	Not	Not	Not	Not	Not	Not	75	1.65	Not	Not	Not	Not	Not	Not	Not	Not	Not	Not	Not	Always	Always	Never	Never	Never	Always	Always	Not	25 Sep 20	27.5482	7-11a		Not	Yes	Yes
185	1	Quillabamba	2A	Fem	57	2	Not	Not	Not	Not	Yes	Not	57	1.55	Not	Not	Not	Not	Not	Not	Yes	Not	Not	Not	Not	Never	Never	Never	Never	Never	Never	Never	Not	14 Sep 20	23.7253	7-11a			Not
477	3	Quillabamba	1026	Masc	49	6	Not	Not	Not	Not	Not	Not	80	1.72	Not	Not	Not	Not	Not	Not	Not	Not	Not	Not	Not	Always	Always	Never	Never	Never	Never	Always	Not	19 Sep 20	27.0417	12a+		Not	Not	Not
484	1	Quillabamba	1033	Fem	26	1	Not	Not	Not	Not	Not	Not	80	1.6	Not	Yes	Not	Not	Not	Not	Not	Not	Yes	Not	Not	Always	Always	Never	Never	Never	Always	Always	Not	19 Sep 20	31.25	7-11a
917	1	Quillabamba	26	Masc	23	1	Not	Not	Not	Not	Not	Not	68	1.61	Not	Not	Yes	Not	Not	Not	Not	Not	Not	Not	Not	Always	Always	Sometimes	Never	Never	Always	Always	Not	20 Sep 20	26.2336	12a+
916	1	Quillabamba	25	Fem	52	1	Not	Yes	Not	Not	Not	Not	54	1.57	Not	Not	Not	Not	Yes	Not	Not	Not	Not	Not	Not	Always	Always	Never	Never	Never	Always	Always	Yes	20 Sep 20	21.9076	7-11a
549	1	Cusco	45ER10	Fem	57	2	Not	Not	Not	Not	Not	Not	50	1.5	Not	Not	Not	Not	Not	Yes	Not	Not	Yes	Not	Not	Always	Always	Never	Sometimes	Never	Always	Always	Not	20 Sep 20	22.2222	7-11a	0	Not	Not	Not
1503	1	Quillabamba	2003	Fem	45	1	Not	Not	Not	Not	Not	Not	70	1.58	Yes	Not	Yes	Not	Not	Yes	Not	Not	Yes	Yes	Yes	Frequently	Always	Sometimes	Frequently	Sometimes	Always	Always	Not	14 Sep 20	28.0404	12a+
476	6	Quillabamba	1026B	Masc	32	8	Not	Not	Not	Not	Not	Not	74	1.7	Not	Not	Not	Not	Not	Not	Not	Not	Not	Not	Not	Always	Always	Never	Never	Never	Always	Always	Not	19 Sep 20	25.6055	12a+		Not	Not	Not
549	2	Cusco	45ER10	Masc	28	2	Not	Not	Not	Not	Not	Not	72	1.63	Not	Yes	Not	Not	Not	Not	Not	Not	Not	Not	Not	Always	Always	Never	Sometimes	Never	Always	Always	Not	20 Sep 20	27.0993	12a+	0	Not	Not	Not
321	1	Cusco	89	Fem	48	4	Not	Not	Not	Not	Not	Not	60		Not	Not	Not	Not	Not	Not	Not	Not	Not	Not	Not	Always	Always	Never	Always	Always	Always	Sometimes	Not	20 Sep 20		<7a		Not	Not	Not
164	2	Quillabamba	23	Fem	22	2	Not	Not	Not	Not	Not	Not	55	1.68	Not	Not	Not	Not	Not	Not	Not	Not	Not	Not	Not	Frequently	Always	Never	Never	Never	Always	Always	Yes	14 Sep 20	19.487	7-11a
477	4	Quillabamba	1026	Masc	51	6	Not	Not	Not	Not	Not	Not	78	1.6	Yes	Yes	Not	Not	Not	Not	Yes	Not	Not	Not	Not	Always	Always	Never	Never	Never	Always	Always	Not	19 Sep 20	30.4688	7-11a		Not	Not	Not
185	2	Quillabamba	2A	Fem	28	2	Not	Not	Not	Not	Not	Not	68	1.59	Not	Yes	Not	Not	Not	Not	Not	Not	Not	Not	Not	Always	Always	Never	Never	Never	Always	Always	Not	14 Sep 20	26.8977	12a+			Not
477	1	Quillabamba	1026	Masc	32	6	Not	Not	Not	Not	Not	Not	78	1.65	Yes	Yes	Not	Not	Not	Not	Yes	Not	Yes	Not	Not	Always	Always	Never	Never	Never	Always	Always	Not	19 Sep 20	28.6501	12a+		Not	Not	Not
330	5	Periphery of Cusco	2501	Fem	53	5	Not	Not	Not	Not	Not	Not	70	1.55	Not	Not	Yes	Not	Not	Not	Not	Not	Yes	Not	Not	Always	Always	Never	Always	Sometimes	Always	Always	Yes	25 Sep 20	29.1363	<7a		Not	Yes	Yes
1005-423	2	Periphery of Cusco	1741	Fem	73	3	Not	Not	Not	Not	Not	Not	60	1.54	Not	Not	Not	Not	Not	Not	Not	Not	Not	Not	Not	Always	Always	Always	Frequently	Never	Always	Always	Not	19 Sep 20	25.2994	<7a		Not	Yes	Yes
330	3	Periphery of Cusco	2501	Fem	23	5	Not	Not	Not	Not	Not	Not	55	1.56	Not	Not	Not	Not	Not	Not	Not	Not	Not	Yes	Not	Frequently	Always	Never	Frequently	Sometimes	Always	Always	Yes	25 Sep 20	22.6003	<7a		Not	Yes	Yes
164	1	Quillabamba	23	Fem	52	2	Not	Not	Not	Not	Not	Not	95	1.65	Not	Not	Not	Not	Not	Not	Not	Not	Yes	Not	Yes	Sometimes	Always	Never	Never	Never	Always	Frequently	Yes	14 Sep 20	34.8944	7-11a
477	5	Quillabamba	1026	Masc	30	6	Not	Not	Not	Not	Not	Not	67	1.68	Not	Not	Not	Not	Not	Not	Not	Not	Not	Not	Not	Always	Always	Never	Never	Never	Always	Always	Not	19 Sep 20	23.7387	12a+		Not	Not	Not
565	6	Periphery of Cusco	5341	Fem	34	8	Not	Not	Not	Not	Not	Not	51	1.57	Yes	Yes	Yes	Yes	Yes	Yes	Not	Yes	Yes	Yes	Yes	Always	Always	Never	Frequently	Never	Always	Always	Yes	20 Sep 20	20.6905	12a+		Not	Yes	Yes
CHS39	2	Quillabamba	31	Fem		4	Not	Not	Not	Not	Not	Not	70	1.5	Not	Not	Not	Not	Not	Not	Not	Not	Not	Not	Not	Always	Always	Never	Never	Never	Always	Always	Not	20 Sep 20	31.1111	7-11a
399	2	Periphery of Cusco	50ME02	Fem	42	3	Not	Not	Not	Not	Not	Not	100	1.58	Yes	Yes	Yes	Not	Not	Yes	Yes	Not	Yes	Yes	Not	Always	Always	Never	Sometimes	Never	Always	Always	Yes	27 Sep 20	40.0577	7-11a		Not	Yes	Yes
921	1	Quillabamba	30	Masc	37	3	Not	Not	Not	Not	Not	Not	60	1.65	Not	Not	Not	Not	Not	Not	Not	Not	Not	Not	Not	Always	Always	Never	Never	Never	Always	Always	Not	20 Sep 20	22.0386	12a+		Not	Not	Not
10	3	Periphery of Cusco	31	Masc	71	4	Not	Not	Yes	Not	Not	Not	68	1.64	Not	Yes	Not	Not	Not	Not	Not	Not	Not	Not	Not	Always	Always		Always		Always		Not	14 Sep 20	25.2826	12a+
931	1	Quillabamba	40	Fem	76	1	Not	Not	Not	Not	Not	Not			Not	Not	Not	Not	Not	Not	Not	Not	Not	Not	Not	Always	Always	Never	Never	Never	Always	Always	Yes	20 Sep 20		<7a
CHS39	1	Quillabamba	31	Fem		4	Not	Not	Not	Not	Not	Not	70	1.5	Not	Not	Yes	Not	Not	Not	Not	Not	Yes	Not	Not	Always	Always	Never	Never	Never	Always	Always	Not	20 Sep 20	31.1111	12a+
199	4	Quillabamba	Q199	Masc	18	5	Not	Not	Not	Not	Not	Not	60	1.6	Not	Not	Not	Not	Not	Not	Not	Not	Not	Not	Not	Always	Always	Never	Sometimes	Never	Always	Always	Not	14 Sep 20	23.4375	12a+
476	3	Quillabamba	1026B	Fem	32	8	Not	Not	Not	Not	Not	Not	61	1.58	Not	Not	Not	Not	Not	Not	Not	Not	Not	Not	Not	Always	Always	Never	Never	Never	Always	Always	Not	19 Sep 20	24.4352	12a+		Not	Not	Not
565	1	Periphery of Cusco	5341	Masc	62	8	Not	Not	Not	Not	Not	Not	79	1.65	Not	Not	Yes	Not	Yes	Yes	Not	Not	Yes	Yes	Not	Frequently	Always	Never	Frequently	Never	Always	Always	Yes	20 Sep 20	29.0175	7-11a		Not	Yes	Yes
942	1	Quillabamba	52	Masc	38	3	Not	Yes	Not	Not	Not	Not	61	1.5	Not	Not	Yes	Not	Not	Not	Not	Not	Not	Not	Not	Always	Always	Never	Never	Never	Always	Always	Yes	20 Sep 20	27.1111	<7a
469	8	Quillabamba	1019	Masc	59	8	Not	Yes	Not	Not	Not	Not	71	1.5	Not	Yes	Yes	Not	Not	Not	Not	Not	Yes	Not	Not	Always	Always	Never	Never	Never	Always	Always	Not	19 Sep 20	31.5556	12a+		Not	Not	Not
196	1	Quillabamba	Q196	Masc	33	7	Not	Not	Not	Not	Not	Not	75	1.62	Not	Not	Not	Not	Not	Not	Not	Not	Not	Not	Not	Always	Always	Sometimes	Never	Never	Always	Always	Not	14 Sep 20	28.578	12a+				Not
224	2	Periphery of Cusco	224-N-1.10	Masc	20	2	Not	Not	Not	Not		Not	53	1.62	Not	Not	Not	Not	Not	Not	Not	Not	Not	Not	Not	Always	Always				Always	Always	Yes	18 Sep 20	20.1951	12a+		Not	Not	Not
715	1	Periphery of Cusco	45ME09A	Fem	36	1	Not	Not	Not	Not	Not	Not	78	1.65	Not	Not	Not	Not	Not	Not	Not	Not	Not	Not	Not	Always	Always	Sometimes	Always	Never	Always	Always	Not	27 Sep 20	28.6501	12a+
CHS39	4	Quillabamba	31			4	Yes	Not	Not	Not	Not	Not			Yes	Yes	Not	Not	Not	Not	Not	Not	Not	Not	Not	Always	Always	Never	Never	Never	Always	Always	Not	20 Sep 20		7-11a
2210	1	Quillabamba		Fem	31	1	Not	Not	Not	Not	Not	Not	63	1.65	Not	Not	Not	Not	Not	Not	Not	Not	Yes	Not	Not	Always	Always	Always	Always	Always	Always		Not	14 Sep 20	23.1405	12a+
10	1	Periphery of Cusco	31	Fem	62	4	Yes	Yes	Not	Not	Not	Not	71	1.55	Not	Yes	Not	Not	Not	Not	Not	Not	Not	Not	Not	Always	Always		Always		Always		Not	14 Sep 20	29.5526
485	1	Quillabamba	1034	Fem	24	1	Not	Not	Not	Not	Not	Not	65	1.51	Not	Not	Yes	Not	Not	Not	Not	Not	Yes	Not	Not	Always	Always	Never	Never	Never	Always	Always	Yes	19 Sep 20	28.5075	7-11a
565	3	Periphery of Cusco	5341	Fem	58	8	Not	Not	Not	Not	Not	Not			Yes	Yes	Yes	Not	Yes	Yes	Not	Yes	Yes	Yes	Yes	Never	Always	Never	Sometimes	Never	Always	Always	Yes	20 Sep 20		7-11a		Not	Yes	Yes
469	2	Quillabamba	1019	Masc	72	8	Not	Not	Not	Not	Not	Not	65	1.61	Not	Not	Not	Not	Not	Not	Not	Not	Not	Not	Not	Always	Always	Never	Never	Never	Always	Always	Not	19 Sep 20	25.0762	7-11a		Not	Not	Not
10	4	Periphery of Cusco	31	Masc	32	4	Not	Not	Not	Not	Not	Not			Not	Not	Not	Not	Not	Not	Not	Not	Not	Not	Not	Always	Always	Sometimes	Sometimes	Sometimes	Always	Always	Not	14 Sep 20
199	1	Quillabamba	Q199	Masc	22	5	Not	Not	Not	Not	Not	Not	62	1.73	Not	Not	Not	Not	Not	Not	Not	Not	Not	Not	Not	Always	Always	Never	Never	Sometimes	Always	Always	Not	14 Sep 20	20.7157	12a+
186	1	Quillabamba	1	Fem	49	1	Not	Yes	Not	Not	Not	Not	64	1.58	Not	Not	Not	Not	Not	Not	Not	Not	Yes	Not	Not	Always	Always	Always	Never	Never	Always	Always	Not	14 Sep 20	25.6369	7-11a			Not
460	2	Quillabamba	1010	Masc	49	2	Not	Not	Not	Not	Not	Not	92	1.68	Not	Not	Not	Not	Not	Not	Not	Not	Not	Not	Not	Always	Frequently	Never	Never	Never	Always	Always	Not	19 Sep 20	32.5964	12a+		Not	Not	Not
202	3	Quillabamba	Q202	Masc	66	3	Not	Yes	Not	Not	Not	Not	90	1.65	Not	Not	Not	Not	Not	Not	Not	Not	Not	Not	Not	Always	Always	Never	Never	Never	Always	Always	Not	14 Sep 20	33.0579	12a+
199	5	Quillabamba	Q199	Masc	37	5	Not	Not	Not	Not	Not	Not	75	1.68	Not	Yes	Not	Not	Yes	Not	Not	Not	Not	Not	Not	Always	Always	Never	Never	Never	Always	Always	Not	14 Sep 20	26.5731	12a+
477	2	Quillabamba	1026	Masc	38	6	Not	Not	Not	Not	Not	Not	80	1.73	Not	Not	Not	Not	Not	Not	Not	Not	Not	Not	Not	Always	Always	Never	Never	Never	Always	Always	Yes	19 Sep 20	26.7299	12a+		Not	Not	Not
544	1	Cusco	45ER8	Masc	27	1	Not	Not	Not	Not	Not	Not	56	1.56	Not	Yes	Not	Not	Not	Yes	Not	Not	Not	Yes	Not	Always	Always	Sometimes	Never		Always	Always	Not	20 Sep 20	23.0112	7-11a	0	Not	Not	Not
565	2	Periphery of Cusco	5341	Masc	39	8	Not	Not	Not	Not	Not	Not	84	1.74	Yes	Not	Yes	Not	Yes	Yes	Yes	Not	Yes	Not	Not	Always	Always	Never	Frequently	Never	Always	Always	Not	20 Sep 20	27.7447	12a+		Not	Yes	Yes
323	1	Cusco	89	Masc	42	3	Not	Not	Not	Not	Not	Not	68	1.62	Yes	Not	Yes	Not	Not	Not	Yes	Not	Yes	Yes	Yes	Frequently	Frequently	Sometimes	Sometimes	Sometimes	Always	Always	Yes	20 Sep 20	25.9107	12a+
330	1	Periphery of Cusco	2501	Fem	37	5	Not	Not	Not	Not	Not	Not	77	1.56	Not	Not	Not	Not	Not	Not	Not	Not	Not	Not	Not	Frequently	Frequently		Frequently		Frequently	Frequently	Yes	25 Sep 20	31.6404	7-11a		Not	Yes	Yes
711	1	Periphery of Cusco	45ME04	Fem	31	2	Not	Not	Not	Not	Not	Not	58	1.6	Not	Not	Not	Not	Not	Not	Not	Not	Not	Not	Not	Always	Always		Sometimes	Never	Always	Always	Yes	27 Sep 20	22.6562	12a+		Not	Not	Not
CHS39	3	Quillabamba	31	Masc		4	Not	Not	Not	Not	Not	Not	67	1.62	Yes	Yes	Not	Not	Not	Not	Yes	Yes	Not	Not	Not	Always	Always	Never	Never	Never	Always	Always	Not	20 Sep 20	25.5296	12a+
321	2	Cusco	89	Masc	20	4	Not	Not	Not	Not	Not	Not	58	1.65	Not	Not	Not	Not	Not	Not	Not	Not	Not	Not	Not	Always	Always	Never	Always	Always	Always	Sometimes	Not	20 Sep 20	21.304	7-11a		Not	Not	Not
476	1	Quillabamba	1026B	Masc	61	8	Yes	Not	Not	Not	Not	Not	85	1.69	Not	Not	Not	Not	Not	Not	Not	Not	Not	Not	Not	Always	Always	Never	Never	Never	Always	Always	Not	19 Sep 20	29.7609	12a+		Not	Not	Not
182	1	Quillabamba	5	Fem	65	1	Not	Not	Not	Not	Not	Not	63	1.5	Not	Not	Not	Not	Not	Not	Not	Not	Not	Not	Not	Always	Always	Never	Never	Never	Always	Always	Not		28	<7a		Not	Yes	Yes
